# Supplementary material
Source: publisher figshare collection journal article supplement (https://gsajournals.figshare.com/ndownloader/files/24866537)
Supplement: Supplementary file 1 [file 24866537]

## Sheet: Table S1
Table S1. Features of the preliminary P.ostreatus PC9 assemblies obtained with Canu, Falcon, and Quiver (polishing). nt, nucleotides.
Features	Canu	Canu+Quiver	Falcon	Falcon+Quiver
Total nt	36056011	36058485	36394568	36404395
Scaffolds	32	32	47	47
ACGT nt	36056011	36058485	36394568	36404395
GC%	50.8	50.8	50.51	50.51
Scaffold N50 nt	2884572	2884610	2946748	2947601
Scaffold N90 nt	1116861	1116922	1098381	1098853
Scaffold max nt	4834601	4834751	4859598	4860115
Scaffold min nt	1971	1971	9168	9168

## Sheet: Table S2
Table S2. Features of the merged P. ostreatus PC9 assemblies constructed in Quickmerge, using the Canu assembly as reference and the Falcon assembly as donor (Canu-Falcon) or vice versa (Falcon-Canu). nt, nucleotides.
Features	Canu-Falcon	Falcon-Canu
Total nt	36454866	36097392
Scaffolds	40	29
ACGT nt	36454866	36097392
GC%	50.46	50.79
Scaffold N50 nt	3310143	2947616
Scaffold N90 nt	1369931	1116922
Scaffold. max nt	4860115	4860865
Scaffold min nt	9168	1971

## Sheet: Table S3
Table S3. Information on 10 merged contigs of the PC9_AS assembly (identity>99%, overlap length>10-kb).
Scaffold	Contig	Length (bp)	Contig	Length (bp)	Merge length (bp)	Overlap length (bp)	Identity %
scaffold_7	000004F|arrow|pilon	2947565	000014F|arrow|pilon	353851	3254697	46719	99.07
scaffold_2	000017F|arrow|pilon	148646	000001F|arrow|pilon	4411733	4530594	29795	99.87
scaffold_4	tig00000114|arrow|pilon	1116895	tig00000062|arrow|pilon	2400614	3505455	12066	99.15
scaffold_6	tig00000057|arrow|pilon	2427394	tig00002981|arrow|pilon	892613	3309613	10406	99.69
scaffold_13	tig00000121|arrow|pilon	827676	tig00002975|arrow|pilon	93950	93884	28837	99.02

## Sheet: Table S4
Table S4. PC9 genome annotation table.
GeneID	Feature	Contig	Start	Stop	Strand	Name	Product	BUSCO	PFAM	InterPro	EggNog	COG		GO Terms	Secreted	Membrane	Protease	CAZyme	Notes	Translation
PC9H_000001	CDS	scaffold_1	49237	49667	+		hypothetical protein						7192							MNPATSLPYSLPPAPKYEKQSHNPKLDGTNYASWKDHVTAFFYAQDLGSILEPAPPVAGAAASASASDADKGPNPAESLFSGLSKTAQMQSDTKAYGLIFFFDHQPS
PC9H_000002	CDS	scaffold_1	51038	51665	-		hypothetical protein													MPSATNTEHDECTISIMGRVVEMIGKACLTPNVVPDNLWHHLPEVSTTEGMKDVLVVCAVGRLLPVFFSQHVECQDEVAVISSNALRVARQIQASDKFRFSFAGRPLSFIGDIYEVYLQQVCRIYCHLLSEQGYPIPLEQIRRLRECDDFEPGFRGGPGGGKAPKQPDSLSDLRLDLAVECFIDFVLEK
PC9H_000003	CDS	scaffold_1	51838	54711	-		hypothetical protein				ENOG410Q43A					1 (i46-64o)				MSLAHVDLALSPQQKTSLVNQITSAEREIKHWIENPFSKDSHNSKAALVIGIIATYSLLTAIQLNPTLSHNTCGPSPQPDGCIKLAGNSTDSIVKLYDWPVMVKKALSSLGQMLENPKEQEKANQFFSALEQGDDDLGYLYGIFQKSKNSSKASRIVANFALAAAGLRAALEGKEIPEKWGRADKQTGAEYLQQHRGANPSVGPQALLLPLHQALAVSPLLLLQTRDAMGKHVARHWHLLMWKHLGCQRPPLLGLIENIIWTTLCQVAVRPKEIPQAMASLYERLKEMTRYDKENNAFELEVEPECHEFYKSLEPLFYVPTSVDDGPALAQPALAPGTPPTPPSNTSYHPPAAGPSGLNAPRENSPPPDGPLSNAGKGDDAEDEDDNDNDNDNDNDNDK…
PC9H_000004	CDS	scaffold_1	69716	70026	-		hypothetical protein													MASTRPCVRWITTATVSRPVRAYEIRGSMNMSTSAGTVVATSNFCNAAYPSVSSARIQIPPAAAQDPYPDTVNQNGKWSPLVT
PC9H_000005	CDS	scaffold_1	71401	71941	-	KIN1_1	serine/threonine-protein kinase KIN2				ENOG410PFZJ	T:(T) Signal transduction mechanisms								MLPPVQPVPSPTSPTFQTHPQPRASDAGLPVPLSPATMPSSPTQPMSPVASAAATIKLKQVQMQEVGVRPPTGTTNAGGTKTMPRAPPASTHRQSHSLRQRPKVLRGWSNMFGGGEHGEEGRNIPDGPRTANAKHQHHVNALSHSRPLTHAPTQLDSANPPFLPSSHNSPSPRTHDRLG
PC9H_000006	CDS	scaffold_1	73275	74271	-		hypothetical protein		PF11807	IPR021765	ENOG410PPT2	S:(S) Function unknown		GO:0043386		1 (i59-77o)				MSYSKLASNDGLTVFDDRVNIEHGDYLQEQLLGLGEQHRRSRDEYCISRWCTRIINSPIVLWCIVLLQFVTIGVLVWRTDLPEENSLFSPANEAISYKYHRFFNGFGRNVSPFQVPSSKELDDLWEDLYNLGISRIPTSQAKRLPNATEAIPGDEDNYIVELDVFHELHCLVNHYPDMRLSLPGNQAHMSHYLDSIRQSLMCSADVSLIVWKWDDEAGQSFPRGDVVHRCRDFDKIKEWAAERQLMGNFNVSVHVVNDLPSPPLLY
PC9H_000007	CDS	scaffold_1	75426	75766	-		hypothetical protein													MSPIILVRCVVFPSAFTRASFARFMSSGASSKNPLKQSKNTGKEAREKLNNPVDAVSPQHMEKPSKDATGNKEGIGMVDQVGSQSSTAKKNQGKSSK
PC9H_000008	CDS	scaffold_1	76425	76794	-		hypothetical protein													MDEASKHERGVDLGWFFFRLRYEDRSKRRNFQNLRLLLVWGNCVTGKEKCTVADIFEELPGLECFEAMMDDVRCTRDARDGTTRVVRWRCQKNEAWRRDWAKGVSTVDPDSPLILFSDLWCQ
PC9H_000009	CDS	scaffold_1	80411	81326	+		hypothetical protein													MDLGFVWIHSVAMNLSGSRFCAAHRDFSGDRPVAVVSMESTTCETMTEPVENSDERSPFAKISSDERTSDERFLFARDIKSKQVSRTVPVRKASTGWYTNGTPWRDCVLMPHPEKWKDFYGFGTAHPLSKRSQWAGTKWINLAHSRNFLRCPGRVPLMNGHPCTSLIVFSSRFNVTPYRQCAQLLATKCPGQACTPVLWAQMLVSYERSPLREWPKLYQPRPALGCASDKKNKMKDMNTHDIHNRAQVHIHAFPSELFTERGTACAHQRPAERRRRVDAIREARYALYEPQSGRAVLKANRRNA
PC9H_000010	CDS	scaffold_1	81937	82210	+		hypothetical protein		PF08991	IPR009069;IPR027179	ENOG410Q40V	S:(S) Function unknown								MPKNPEACQTEACDLQSCLGKNTYTPEKCEHHLKRLYLCCQNMHKEGGDKAQSTACPQSNVVTRWLKDHP
PC9H_000011	CDS	scaffold_1	84868	85126	+		hypothetical protein													MSMPMEWGDGLGLVITYSPIRQQNTPGAQRGDRSVLQTALSAHSPAPCDDESVVSIDAYGVTPNPL
PC9H_000012	CDS	scaffold_1	85146	85825	-		hypothetical protein													MLALTSGCELSQISTGWTTLTHLYLYSEPDKAHREPSQPDGSSVHLSSALARMSSWADLDMRGAIPPHTCTSAPSGIQAIDLPRRALLAIRDVASSHYADYEHGESRYYLLQMCRQHMAAVFKRTPVSHIALANRPDEFLVQGSRGRLRKPTDVRDSAFAAVLRRWGARFPCRNHRSGAAAPQTGVGSEGVDGLDLAFPA
PC9H_000013	CDS	scaffold_1	86049	86718	-		hypothetical protein													MRLARRPPSPHSANHLAALAAPRERRGINTLPFALLRQILKRAFTDHFTHEERTVPPARALVALTHVCGARRTIIPQLWEIVCRVEPPAMIRETVTRSRGMPLLMCSLRKSTTMRTGGDGQADRDEDEDEGADEDEDETEEWRRSEDDGDDEHVEDRHGIGRHEDEDKADELHGVYGHESSRGESDGSDDSGDNEWR
PC9H_000014	CDS	scaffold_1	87098	88131	+		hypothetical protein													MDIYGEDGDDDVDFALNLAYPDEEAPPPLLPLPPATIDIDSTINTDAASSCNKETLMAFEDPGEETENGEDWGEGEEDLLMYLAYPDEGSPSASANAISLRDSPSRPPPSSSASISGPASASPSKRKRKRNGWIRRKRSTGQRGKSSRAPPAPVSATENMTYEEWCRSVLSSVTGSRRRCGSSHVSGVRADSVGTASTSCDGEIANSKEPEGVGRHGPDWEGKDAAGEGAASMEALPSDDRKKPSEPLKIRIKIPSSLSLKSLLPPLPSPRPSVDSPLRPSYQPTSLPLLYLYQRSPRWLSPLHPPHLNLK
PC9H_000015	CDS	scaffold_1	88919	90220	+		hypothetical protein		PF02469	IPR000782;IPR036378;IPR040200	ENOG410PTFB	S:(S) Function unknown				1 (i132-150o)				MNAISVHPIIPVYASTSTSWPKPDEILPGSTPETSRNNGTKPSMHIVPSSNPNPRPVCVNTTQRDTPPKLESNQHSLAHCPPKRTLNINTRVLRVILSVTILDDPSHPCLEFAPMNPYPSPSRAALTLTMKLQSLIAVLLPFLAISYASIDEQLPMANAHHQASFEPLTSSKPTLADLLTIESSASIFYSYARELELCAIFSDKGVNNTLLVPTNKAVMALHRKPHQGPETVSGDVTISEEEFDSISKRNVEKWISAHIIPESPITLESKTYPTLLHRKTVSFTALPKSDPKAAEWTRVLVNGDVHIIGMKEALNGVLYLIDGTISVD
PC9H_000016	CDS	scaffold_1	90736	93271	-		hypothetical protein			IPR036570										MLNGAQQRATGSGGITGSSRRDANVEGEEAVMLAFCLKLFLVITSARTTIIEPCIPDHVENSFETESAIPARLDRQRSESSGLLPLSTTMSEKILNPERLIPTSTHELCIETFLVFPPELTRSESICKILEDPLLSTIFMQTRLDYTKRCILVEEHILTFEPTKTATPAHDQTARSGPSLFGPPIKASHKEQGAAFFRGICYYLDSLPAARLCQRLKQYCGNLNVNILVSVRDGTREDVLGFDDDVLDPRHPRESYLGYSPPMTFWQPRGTYALSSRYLQDPMKLYKQIHRLLFSMVHELNPKPPAHLSIGFWMWPLPRPRPRCITNASNESDSESSPTPGGDRGRRPSRRRLPFLRRSRSLRSLREFKSTPSPPPSAPSTDNEERSSTTRKEKDGAIG…
PC9H_000017	CDS	scaffold_1	94990	95418	-		hypothetical protein		PF03259	IPR004942	ENOG410PSFY	S:(S) Function unknown								MSTPELDHTLSLLSSHRTVLGYILMSRGHPYGIVRQSGVIFDGEHGRKYAAAIGKIMENVQSSLEELSDEPNDGDEVKFLRIRTKRHEVMISPDDKYLLAVLHDPAS
PC9H_000018	CDS	scaffold_1	95986	98082	-		hypothetical protein		PF00128	IPR006046;IPR006047;IPR006048;IPR013780;IPR017853;IPR031319	ENOG410PJX1	G:(G) Carbohydrate transport and metabolism		GO:0003824;GO:0043169;GO:0005975	SignalP(1-15)			GH13_15;GH13_24;GH13_32;GH13_27;GH13;GH13_2;GH13_1		MNWVLLLSLAAAYLALDIPAASPSIDSNVKKEVIIQMFQWDWDSIGEECAEFIGPAGYGFVQVNPPSEHVQGSQWWTDYQPVSYKIASKHGNRDQFKRMVEKCHTAGVKVITDTLFNHMSAMQGPATGTAGSTFSKYDYPGLYSYKDFHHNCGTPNNDILNFNNRNQLQNCELLGLADLDTKSDVVRARLVEYAKDLKSLGVDGFRIDAAKHIPADELEAILSKVPGFRSPSLYITQEVFGGTQPGEEVRATEYLGNGDVHVFEYANEIKAAFLSGNIASLKDLDSRGWIPSASANVFVVNHDKERLDESLNAHSPSNTYTLGHVFSLAYPYGHISVLSSYESGIDNHDVGPPNGGWLCQHRWTAIAGMTRFRNAVRDTKLENWQSPQGDRIAFSRGNA…
PC9H_000019	CDS	scaffold_1	98930	100974	+		hypothetical protein		PF00128	IPR006046;IPR006047;IPR006048;IPR013780;IPR017853;IPR031319	ENOG410PJX1	G:(G) Carbohydrate transport and metabolism		GO:0003824;GO:0043169;GO:0005975	SignalP(1-21)			GH13_15;GH13_24;GH13_32;GH13_27;GH13;GH13_2		MAIAITILYLLAAIALNRVGATPLANAPTDSEATKPDLSSVDKKVIIQLFQWNWKSVADECEHFIGPAGYGYVQVSPPNEHITGTEWWKDYQPVSYKIESRRGNREQFRQMVTKCHAAGVKVITDTLFNHMSSLSSGKGTGGSTFDKYNYPGLYSYQDFHHKCGSSDEVIHDFRSRKEVQTCELLGLADLATGNENVQRRLRAYATDLRSLGVDGFRLDAAKHIPANDLKSILSSVPGFGTPSFYVTQEVVGGTKDDDSEVKATEYVQNGDVQVFEYSKKIREAFMKGSFMILKDLGRDWVPSAHANVFVVNHDKERDGEALNANAPSNIYILAHIFSLAYPYGRVSVLSSYEGGLGDKDVGGPNQGNAKCSGSARNGNGGWMCQHRWVAIGGMTRFRN…
PC9H_000020	CDS	scaffold_1	101535	102820	+		hypothetical protein	EOG092R0HTG	PF03061	IPR006683;IPR029069	ENOG410PMV5	S:(S) Function unknown				1 (i57-75o)				MSFFIRSSLRRAALGPLGRVSRPPASFSTAASSTGSSSSTSDSQQPQNKRGLSTTSTILLASLIAATSYTIGSIFPPPPFTILFPRAAPPPPSNPDSEESKRYTEDLESKLHTLPSVQAHRTSEAQEWYETRPYANFPEERRVNNLTAGALRGPGKLALKPLVRARKDETEALVWIHLGRGLCGHDGIVHGGLLATLLDETLARQAISNLPDKVGVTAQLSINYKAPTRADQFILIKTKLVEAKGRKARVSGVVEDLEGNILVEATATFVQPRYAKLLKPEVLKHAMGEPAHSHEPVLIADGEKMRGPHDDGVTK
PC9H_000021	CDS	scaffold_1	103176	105481	-		hypothetical protein				ENOG410Q4B1					6 (o12-30i51-74o94-112i124-147o159-185i206-227o)				MAFTEGQTLDNMLGSLFVGSLLAGVLYGVTSLQAYSYYHWFYGRDSLVHRIAVGLLWCLDTLHFVLVVHGVYYYCVSSFGSSVHLSVLVWSMKLQIVINVIIILLVQGLYAYRVWLLGGYHNKIIAYITVAIVSIAFGVGMVLAHYVYTLTDIADHESIGWAIIASLATATFVDFFIAGAMVYYLRRSRGLQSRVNSKLSTMMHMSLTSGVLTSACSMTALIVYVTMPKTLIFMGVESFLTKRQSPPPAFSLPGSAHSPLLPFAHPPVYINSFLAMLNARERQQHTLTHAHVHHSDPAQHADASHSHPHSHSRLSTSLSVHIPGFSVPFKSPAPTFPSSPQAKSAPLGPSFMTPVPVPMKLSPSLSISLGGFEKGKAGNELGIGGGIGMGMIGIGVETT…
PC9H_000022	CDS	scaffold_1	109690	111766	-		hypothetical protein		PF06985	IPR010730	ENOG410PP66	S:(S) Function unknown								MLPTSDDGFVSKVSHPLCGNCRAIFAAIPFHIPGRYEGEHHLTVRDLEESAGNDCQLCIIALNGTTHETLESWRCSDLNTSLTPIRWSIAFSKKWPDFFTIRWTKSDFLDVRLSFEETEEGTTPPAAGTSDSTGSEEALTCARRWLTDCTKTHEQCCARTSKGWLPTRLIHVGGEANATTLRLCIRAEVPSESTYMTLSHCWGSPAKDQLKLLQHNIEELQRQIPFGKLPKTWVDAITVTRAMGCEYLWIDSLCIIQDSVDDWRRECSIMGLVYKNGWCSIAASAAKNGSEGCFMSRHPTCFHPLIVEVESTRMSAAYSCSARRFHVNRLAQDVESPLYQRGWVIQEWFLAPRILFFARQMIHWECASGAASEALPTVNKTKSVLSFATKLRARYERAP…
PC9H_000023	CDS	scaffold_1	113351	115966	+		hypothetical protein				ENOG410PZ51				SignalP(1-28)					MRPGKPERQRLFLIFTFVATRLAVSVSAAPANDWSKPCFNGECAYDLPEHSNSGLGALKISGSPKSITDITSAAGWVVLDCDPHMLEQEIRLVCQSDDDVDDSACNHVFEHWGPQDKIVRLPESCGSGPFARIAAASVATNQDLPAHAEGKVVRRSGTPPVIHSFKIDTNFDLVDVEKVGPINFAFVGLTSPSPSETFTNPDIDLNFEFVDSWFDNAFQSVGTWVSNAATTTAQAVTGAAKDVAKAAERVGTTVAKVAGSVFKKIEEVGGLLENATHFEFEPTVALVPVKYNGSASLIDYHPQGCPGGGGPATGGVVTGALKVDVTGVGNGNVKAGIIVDGAIVPPKIHNFAAFAGLSFDIDASVTIKAAVFGGYDSGKVSIIKPLSLPGFSIPGVLAV…
PC9H_000024	CDS	scaffold_1	116711	119558	-		hypothetical protein			IPR008266;IPR011009;IPR040976				GO:0004672;GO:0006468						MAHHIISQTTPVKKTKPPAVNRRQMSDIVDRTGYLTPSATFSSLRLHKSTTRSFATILNDKELLQLVNQFRATGQTDYGLLAQLLSRASVLIRLKYAKGKDLVVFRDNHSRSPKYHPNDTEAGAPDLVGLLEAISLLLDDDDTARIPWHHILTIIEEKGKADRKDAPRHSVPYLASANQARPDLVGMYGVAISPVGYIIQYSCPAGLQTSEEFPWSDLVPLVSYVYTLYVPHPDFATRDPSVTLADTGDVLGPPAWNIRDGDKVYENCVVRVVGDPWHRMTWVAKVGDTPITIKDSYRDVHSSFREGELYDILHKEGPAPGFLRVKKEYEVQWKRGCPITVTVDSTTRIKTRLIMHTWGESLRKCPSLIDFLKCMYDILEAHRWAVMERNIIHRDISHG…
PC9H_000025	CDS	scaffold_1	122481	123217	-		hypothetical protein				ENOG410Q3Z8				SignalP(1-21)					MLAKLALQFVALSSLLVGVISTPVLYGSGSSDSLARRGNSISFNHWGGHASLDNFDRFYGVDNFDGSVHFSQVVEQESQVVCHTQAIEIIQQRLVVLQEMAKRIITEQICEVETQTIVFQQFHASFGSFNHDLRRISGHRVGFDSRIANHFSELVDERGLISTHDFGFSGLDVGKHTVVVGGHNWDDFRSPYTVELAHRAARNAIVSIH
PC9H_000026	CDS	scaffold_1	125380	125997	-		hypothetical protein				ENOG410PZ57				SignalP(1-17)					MKFSLAVVASLFAAAQAASIPPVNETLTNTDPCPRPHTEVYFFRAFNPSRVDHFYTTSVQELTSATHVSGYASEGIQGFIFPSPEASTVPLYRLFHPARTDHFYTTNEAEAISATGLGWNRQGIAGYVLDRPICGSAPLFRLYNAGNVDHFYTTSAAERDNFLRSRLYVDEGIAAFIYV
PC9H_000027	CDS	scaffold_1	129873	131264	-		hypothetical protein		PF01408	IPR000683;IPR036291	ENOG410PJSM	S:(S) Function unknown		GO:0016491						MSGIAILGAGIFAKEAHLPALAKLGANTPILRAVYSRSEKSAHDFATAAAATLKLDPAPTVYHDGGDPSVSLDALLTTRSDIDAVIVVLPITLQPSIIIKALAAGKHVLSEKPVAPDTSSGLSLIAKYNEEYKPKGLVWRVAENFEAEPGFQAAATAIRDGKIGKVSFFDVRVVNYIDKESKWYKTPWRTVPDYQGGFLTYCAIKQLDGGVHTAAALRVMLPSPLTHLSGFASLNKDYLPPHDTIHAIAKSIAKDSTTTFHGTASLTWASPTASKSVPDGITITGSDGWLSATTIYAEGVVRITIKSVVHAAGKPDEEREEIIDKPIQGVQRELESFFAATKGTDDGLGDPLGALRDVAFIQAGLDSNGALVDLEKLISSD
PC9H_000028	CDS	scaffold_1	131606	134259	+	BGL1B	Beta-glucosidase 1B		PF00232	IPR001360;IPR017853;IPR018120;IPR033132	ENOG410PKAP	G:(G) Carbohydrate transport and metabolism		GO:0004553;GO:0005975		1 (o525-547i)		GH5_19		MAAPVSKLPKDFLWGFATAAFQIEGSTSVDGRGPSIWDSYSRIPGKTLDGRSGDVATDSYRLWKEDQALLAEYGVKAYRFSLSWSRIIPLGGRNDPVNPQGIKFYSDFIDGLLEKGITPFVVRVFHPLSLSSLLTGVPMPHMKTLYHWDLPQALHDRYGGWLNKDEVVKDYTRYAKVCFEAFGDRVKHWLTINEPWCVSILGYGRGVFAPGRSSDRSRSLEGDSSTEPWIVGHSIILAHAHAVKAYREEFKPKQRGQIGITLNGDWEMPYDDSPENVAAAQHALDFAIGWYADPIYLGHYPPYMRTVLGNRMPDFTPAEWKVVKGSSDFYGMNTYTTNLARAGGDDEFQGLVDYTFTRPDGSQLGVQAECAWLQDYPDGFRSLLNYLWKRYKTPIFVTE…
PC9H_000029	CDS	scaffold_1	134594	136582	+		hypothetical protein		PF00172	IPR001138;IPR036864	ENOG410PH9D	S:(S) Function unknown		GO:0005634;GO:0008270;GO:0000981;GO:0006355						MATFTTYAEAAQQSSQSQAAVVGNNTIASTSAYTNGPEPPVASSQSKDGDEDGGKKKKARRRKVNHACLYCRRSHMTCDEGRPCQRCIKREIGHLCHDEQRQKSTDKHPLPPQPKADATRAYGAGANAYSTPVSTANPSWPLTGPFIYQPETLGNEFSVLTDFLETLDERSFFTPPPTVTSSLMAPNTFPPPLPDTFTNGSITSGTPASTVQVGATATSQPAAQSADVNGNNQKPSDDAPPILPAATKTEKFLLTAADQESGSRDERLNRVIRSKYEAGLLKPYNYVKGYARLSRWMDRNVSQESKSQILQPLSVLRPKFRAVAQSLRDIDLVFIEEAFERMLLDYDRVFSAMGVPACLWRRTGEIYKANREFAELVGIDGYMMRDGRLCIYELMAEES…
PC9H_000030	CDS	scaffold_1	137990	138960	+		hypothetical protein													MSDPSYRIFLRKIQIRVKPAAHVANPIHNMPMSITISLEASDSILGQKDIRTWRDLDWKFRPPVEIHADSEVSIVISPALSAATQSDKQVLATVSFADVLALPRRNSRRVHLQLEHQLATIRISFTVAVNQETSVPLWDSLKRRFLRHFRALFGVDERLDFAPVTAPPASDLEIPEQQPVPPARPGWFRPPVGGHVRPPPNQLHGEFIPQESHIHSEDDFNAVPVDSAKIQYTMVGTKRPKPR
PC9H_000031	CDS	scaffold_1	139359	140989	-		hypothetical protein													MEPATYPELPPEIWRNILRWYTADQDNNILFIRDVNRLFYDVAMDHRFERLDLRDLNAGGAFELQRIRDPWLTKRLKWISLSTWTLVQILTEECYRSEHLLPSALQNHRDETTHIITPSSTVASMLAAPLIECLLDVLASAKNLRKVVVEVQSPPQADFRYITFPRKFLRAAFARLASGASTTTLALRVHYEMLAMLLDELALVQIRSLTELALVIEPREKERVEPIGPVKGQAFFENLGQFPLESLRVFTKQRAVIASQISSILDHNVILPSVRRLDIATTFDDIQPIKSLRTNYPFLTVLILHIIAPDSGSSVPLSALDLPNLLDLRLSLKGAFEGPTFWSGHLNAPRLTQLTVAGALRERMGLPKLQRTVLQVCTFFASGAVEQLEIHAGVLERFL…
PC9H_000032	CDS	scaffold_1	142042	142778	+		hypothetical protein				ENOG410Q3Z8				SignalP(1-21)					MFAKVALQFVALSSLLVGVISTPVLYGSGSSDGLARRGNSISFNHWGGHASLDNFDRFYGVDNFDGSVHFSQVVEQESQIVCHTQAIEIIQQRLVVLQEMAKRIITEQICEVETQTIVFQQFHASFGSFNHDLRRISGHRVGFDSRIANHFTELVDESGLISTHDFGFSGLDVGKHTVVVGGHNWDDFRSPYTVELAHRAARNAIVSIP
PC9H_000033	CDS	scaffold_1	147623	151319	-		hypothetical protein		PF00098;PF08284;PF13650	IPR001878;IPR021109;IPR036875	ENOG41KOG0017	C:(C) Energy production and conversion		GO:0003676;GO:0008270						MSRYPLRNRTASQAAPSNGESELSSPHADPISLEPSPTLGASTLNNERSYADVAGARVLAANRSAADASRVGNDVADGGMSHDDAANPDAGIARNIEPQDGVNESDNGGQWIPVGRGCRRHSAPSIDRLRSGVSPISSNNTIDLAYENLTNSQRKILERRERLLRSNDPDVPEQRVEPNIEPSGDKGKYPDPRNWGDVDFDGENLDPEAQAEALKLYNLLLKRNKNKKLFQEPEVLTRNNQTDPPAVDPDVVSLKQRMAELEAENNQLRRLTRSSRTPVTEGIRDHIEKSTKKAKQKLAEPRISRKSNYLPSQQIPAGSFVGKALKSLADRKHHRPEDPDDSSESSSTSASSSNGSSDSSRNARRKKRSKKKRHAKKKGKSLLKPVPPKRYNGEANLTL…
PC9H_000034	CDS	scaffold_1	154467	157319	+		hypothetical protein			IPR008266;IPR011009;IPR040976				GO:0004672;GO:0006468		1 (o570-588i)				MAHHIISQTTPVKKTKPPAVNRRQMSDIVDRTGYLTPSATFSSLRLHKSTTRSFATILNDKELLQLVNQFRATGQTDYGLLAQLLSRASVLIRLKYAKGKDLVVFRDNHSRSPKYHPNDTEAGAPDLVGLLEAISLLLDEDDTARIPWHHILTIIEEKGKADRKDGPRQSGAYLAFANQSRPDLVGMYGLSISPAGYIIQYSCPAGLQTSEEFPWSDLVPLVSYVYTLYVPHPDFATRDPSVTLADTGDVLGPPAWNIRDGDKVYENCVVRVVGDPWHRMTWVAKVGDTPITIKDSYRDVHSSFREGELYDILHKEGPAPGFLRVKKEYEVQWKRGCPITVTVDSTTRIKTRLIMHTWGESLRKCPSLIDFLKCMYDILEAHRWAVMERNIIHRDISHG…
PC9H_000035	CDS	scaffold_1	157642	158051	-		hypothetical protein													MNHWFERLDLRDLNAGGSFELQRIRDPWLTKRLKWISLSTWTLVQILTEECYRSETLRNAAKTNLAGHTFLSGCRSNRARFVVWR
PC9H_000036	CDS	scaffold_1	162501	163391	+		hypothetical protein		PF00271	IPR001650;IPR027417	ENOG410PYSK	A:(A) RNA processing and modification								MTQAYREEELEKFRQDEVWGICSTDAFGMGMDLPDIKLVVQWRATCGLNTLFQRFGRAARGKGETGVGILLVDKKDLDDENGQRGSSKRKATNQNGPTPKRRALTSNVGQQAATESRCEPSNGDLMEVDMADSVDSSHVTATPSKLHTPVSMDPNECRKRYQKQGGNLGDRSAVGKGRLARGNDLGSPMDDYINAHLRGVCCQRIIPSTFFGNDRRSKSICRWLSKVGSNFIPKKAMTRTLPVTPTIVQAVVVVVPHQKVIAVSSVPRRHSRSTPSCT
PC9H_000037	CDS	scaffold_1	164194	166893	-		hypothetical protein				ENOG410PYQ5					1 (o493-515i)				MVLTTPQLNNVLNTLRDDFNTSPGEVFLLFLCNTANGEDQRGVSAGIIEYAPKILTAMESHQSLSRVFFDKAKELVVCRCTNEVAELSLKVHNGHFNAKTMTEEQIRAYKVGEAVEKTSRLAPVLWQFLMSLLSSDEDIRIRRIELARRRHEKRSGSERKTERSGDIEMSNDGGEEGGEEDNDDDRYFEDSNDEWDDGIDQAMGRRQKLMKIRGLLCASIFLKSTNQHCNAFQSVVGMFLNATNTPETVREFLSSLGVSITTSSINLAVQSLSTGARKRMEELGRSFRVLFAYDNLDMEMKQSVPTVETEQDNLVHLTTGTMLPLHPDVTQEDLDCSEELWERCPPGKPSGVPWMNLAKIHANPADSEGLLQRDRFNRWKFLYDLVHHGPEYFRQFKSN…
PC9H_000038	CDS	scaffold_1	168002	170198	-		hypothetical protein				ENOG410Q4B1					5 (o12-36i48-72o92-109i147-167o179-205i)				MPPGQTLDNTLGSLYVGSLCSAVLYGVTSIQTYAYYHWFFKRDSWVHRIAVGLLWSLDTIHFILVVHGVYYYCVESFENPLKLLTLVWSMKLQIVINVVVILLVQGCASPPPESHMLLMFERRMADYTLTASGYASPLPSSFPHPSWIVVFITAGGFAVGMALAHAVYTLTFVSDHVRISWAIIASLATATFVDFFIAGAMVYYLRRSRGLQQRCRELEDLDDDANVAHLGHTHQYVALPKTLIFMGIESFLTKLYINSFLAMLNARERHHDLAPHHSEHHSSHTHSSRLGVSVHIHSLSRPGGISTATTASKSDSSNPRTSLSLYKSSLAPVSPLESQMELTSLADFSDAHDVHRKGRDVLDIKHSDEDRDTDADGDGEGEGEGARRGKDGDKDKVYSW
PC9H_000039	CDS	scaffold_1	174352	174622	-		hypothetical protein													MPFTCNASTLVAGSTSSSSSPSPSFDSFSSGKTVAWWKESSLSPSPSSHSEASVPPSRYGGLQRSMAIGRKRGAEIARRWSDSKGVIYV
PC9H_000040	CDS	scaffold_1	175296	177896	-		hypothetical protein				ENOG410PX8N					7 (o85-105i125-145o157-182i194-213o245-266i314-335o355- 375i)				MPLGHQSLFQMAQKQSHLRRHTLHGKRRQCDHYVWAWLLTNVQMGMLGCTTTPSYLHDTLRTMDAFSSLRKRASITLEQADALGVLAYACTIPGTILCFLVLLAYGAAALSPKGRPHLDRVSFRLLCYSLFFNILYGIAFSVTAAQTGPGSLCNFGAFAVNFTLNFATFFTTCIAINLQLVLVHRVNGKAMEKYYVIVVSLLSIVLTVPAFGLNQFGWDEANFTCWFKNPDEHTKVQWLIGTQSFWIALAATIETICSVTVLVWMAKFQLNTRFIQKASDPSFLHTSGATGHRSEASSSAQTILSIQARKYRGVIIRIANSNLALYPIVSLLINYPTIGLDIFGSIKGVHTELDYRLLVADLVLYGLRPFAYALLACNDPSFVRAVQDIRGVKIPSSES…
PC9H_000041	CDS	scaffold_1	179089	179397	+		hypothetical protein			IPR000192;IPR015421;IPR015424	ENOG410QDDG	E:(E) Amino acid transport and metabolism		GO:0003824						MLKTGRIYVDNAGGSQIPQDVVNRIAETCLVQAIGVQEGKEAATKLLNATSLDGIVFEGSSTANMDVLMKRLEAEGEIGSGDEIIVMAGEHEGG
PC9H_000042	CDS	scaffold_1	179779	181821	-		hypothetical protein		PF07690	IPR011701;IPR020846;IPR036259	ENOG410QE36	P:(P) Inorganic ion transport and metabolism		GO:0016021;GO:0055085		14 (i79-104o116-135i147-166o172-193i205-230o236-258i270- 290o302-320i341-366o372-391i403-422o428-456i468-489o509- 529i)				MSSAQVSRTPTLTNDCPPAKEKPPTSSPSSSSIVINGRIELPHPDSDNTKTEARRDSEIATDGEVEGALYASLSPRRKLVLLGVFCSAQFFDVFNASAVLVSLPSLGADLHFAPGALQWILSAYTLTFASFMLVAGTLADIFHPKPIFCLGFAFVGVFNIPVGASVHPVMAIVFRALQGMGAAMNVPSGIAMIRTTFPDPIERSVAYASYSLAATVGNISGFVVGGILTARTSWRWVHYLCAIMVIPMSVAAWFLLPAHTTPPKSERRSVDIPGVLTLTAGLILFVYAISDAVDAGWASPQVIATLILSVIAFIAFFIIESIVAHPALPPRTWRNKNFTPLFFYALSPYWWCLGCELQLVSIFLNLWHDSPLIAALRCLPIGVAGGVASYLIGRVLPYL…
PC9H_000043	CDS	scaffold_1	182675	185521	-		hypothetical protein			IPR008266;IPR011009;IPR040976				GO:0004672;GO:0006468						MAHHIISQTTPVKKTKPPAVNRRQMSDIIDRTGYLTPSATFSSLRLHKSTTRSFATILNDKELLQLVNQFRATGQTDYGLLAQLLSRASVLIRLKYAKGKDLVVFRDNHSRSPKYHPNDTEAGAPDLVGLLEAISLLLDEDDTARIPWHHILTIIEEKGKADRKDGPRQSGAYLAFANQSRPDLVGMYGLSISPVGYIIQYSCPAGLQTSEEFPWSDLVPLVSYVYTLYVPHPDFATRDPSVTLADTGDVLGPPAWNIRDGDKVYENCVVRVVGDPWHRMTWVAKVGDTPITIKDSYRDVHSSFREGELYDILHKEGPAPGFLRVEKEYDVQWKRGCPITVTVESTTRIKTRLIMHTWGESLRKCPSLVDFLKCMYDILEAHRWAVMERNIIHRDISHG…
PC9H_000044	CDS	scaffold_1	189088	190982	-		hypothetical protein				ENOG410Q45Z									MAPPSKVNAEQKAFLESLIDTFLENRKKSTLHKFWPVLYRQWFERYPIVEDTSIQDAEERRKDLAAKVEKKREYLNRWYHNHASAKVRAVVLVTHQKKTRRPQLVQMYCKKYYSSRIKPLIVKELNGKVPTRKEFLALLHVHSTAAFDDETPAVKAQMNEEYQKRLSEPVEEPEEEITPSSYAAAIKSIPIHFNAFAQELNSRTGWSFTLFAGGPDPTNGGRINTAAFHSCENMAGLSFSDATPNFTSKLVTPFATFLRTVYTPEDCASRALNSTSQVPRPIQPQSEPSSPAEMPHSAASPIATITSMALTLGNHEETDLDNDLWQDFDPEQALAELTQTSTIPIGVNGFEGLGPPGKFPSMVEELFAPLPGLPYHHHAPLVTPPVAAFTPPTFGSAAT…
PC9H_000045	CDS	scaffold_1	191207	191959	+		hypothetical protein		PF01693	IPR009027;IPR011320										MDPATAAHITNLLDRLSVGTIVQAPVAAGFFECPSCHTIHPLTVAHTPAAAAVTAAAAAVPVAAAAVPAAADVAPAAPAAVPNAPAAAVPAAADVAPAAPAAVPNAPAAAVPAAADVAPAAPAAAVPAAAVPNAAAAAVPQPAPEHPPAGSNPNGPWYAVVTGRQVGLFQDWRRVVAPLVLGVPHWDSQRFSTYAQARRHYNDMLAAGLVHIHHE
PC9H_000046	CDS	scaffold_1	192043	192781	-		hypothetical protein													MPRGRPRIYKTPEDKARANREKSKRSYHKQKVAISSRRVARRYRHERVKNKPILGAAPAEAPPSAYPDPDDVPAWMALVSQVAAKTQELIKGSVRGYFQQICQCFIFSLLRNEIDDAAMEFESMKITIQRCGHALLQVVGVGDEYRAAEQVEREIDQVICCFDDIMCHLLVGKAELFDMYSSEQLMYQSLV
PC9H_000047	CDS	scaffold_1	193188	193713	+		hypothetical protein													MRNLLFWEVDEPNDLTRSIDAFTFEMLPYFTNAFDRGEHKDFFVAALPLFSDRFPTASSEQKRLFAKELIYQDGMTLLGGNVDPPAPFDGNWREAITLEADRERRRSYWRQHGEGDPIEHQYIIAFATIDGATDSYSQL
PC9H_000048	CDS	scaffold_1	193942	194525	+		hypothetical protein													MQRRKRAHMDIQVYEDWELGAGSSTPSQPPITESTTHRHVDYVARKRGISTKTSYYSTEALSTVITDDHGHDESSTYDSVWDETTGLHRIEHDRDDDEEVTCLPRTTRKRTMAGCGCMSAIPLFRNSYGWRDELTQMLGAPAFTQSLPVEKTRFSGVPNVSTLDCSARTA
PC9H_000049	CDS	scaffold_1	197846	199434	+		hypothetical protein													MPYVEETGINWSPGPTVSFHELTWDGEMGEELFVAKKCSKAFRWKPRQPKELALKREIVIKYVKDGYERNDLVVPYSLIEEMAERAEYNVNEEAHIKIKHTFSFGAATCWFKVERRRRYSHAGLRLNFVLEFANSEDCLSFIQHDLTKTKYKLPYCLFRSHANSELREMGYDTFLRTQDDEFSILKTVWQTLTPLASNCLNAQRVAIQRRLPKSQFEDEYPEPEAQLIRQRQQTSTQHNRPCYLILHLAVSFAAFNDTIGVDVATWSAINDPLAFIPPSNIFSSLKHFHVKIPLPTPPNYNYNSSLSGERLPKELALAISERGISFSTDSKPPANNVVLRIGGRYNGDDLRDISPSVLNDSEDLPLNENPQQELASVPANSARIQYTVVGTKRPKPNDSK
PC9H_000050	CDS	scaffold_1	201571	203019	-		hypothetical protein													MSYTTPLWRVNDNIIEHLRSRILLQSHRPSSTQITINHRDTGLRLRCPDRQNETSGHEIQVEFDCSWGAGATVALHGHNWWCNKPERLFVTRKCAKAFRWMPHRPKLLVLEGDVVIQYTKDKHERSDAVMPSYDVIRELAEGAAYDRDRARILHRYYPGLSVRANAVLEFGDSEDCLRFTRCLSGGWCHEYL
PC9H_000051	CDS	scaffold_1	203366	204370	+		hypothetical protein									1 (i89-111o)				MSSMSRLQRLRLRLGRSLDLPKIRPMRTPLTAFRRQSSLQCQPRPIHIPTRCYNSVPPPPPPPLPPPPLGPRPTNRLLHRADGTPRSKLAGLAIAAAATLAFLLYEALAVIDELDHGIHLLAALLHVQRADYRLFAATDLSDPPQLLRLYRALQAAVNPALEDIYGEVDKLLLLREGDEDGDENAGNDKEVYEEVYEEVCAVLRDACAGVHAILHDPLEEAHELAAAAKIVGLLDQSCAELLGILRRRAEAEVAAQTEAQASAGVGVRDVGERDVGVGHAADSRRRTAGEEVGEAGEEYEVVG
PC9H_000052	CDS	scaffold_1	205848	208627	+		hypothetical protein			IPR008266;IPR011009;IPR040976				GO:0004672;GO:0006468						MSDIIDRTGYLNPSATFSSLRLHKSTTRGFATILNDKELLQLVNQFRATGQTDYALLAQLLSRASVLIRVKYAKGKDLVVFRDNHSRPPKYHPNDTEAGAPDLVGLLEAISLLLDDDETARIPWHHILTIIEEKGKADRKDAPRQSVPYLASANQARPDLVGMYGVAISPVGYAIQYSCPAGLHTSEEFPWSDLVPLVSYVYTLYVPHPDFATRDPSVTLADTGDVLGPPAWNIRDGDKVYENCVVRVVGDPWHRMTWVAKVGDTPITIKDSYRDVRSSFREGELYDILHKEGPAPGFLRVKKEYEVQWKRGCPITVTVDSTTRIKTRLIMHTWGESLRKCPSLVDFLKCMYDILEAHRWAVMERNIIHRDISHGNIFVQAEDFKGEDEEEFKGTEYRP…
PC9H_000053	CDS	scaffold_1	208934	209438	-		hypothetical protein													MADQGTNNILFIRDVNRLFYDVAMDHRFERLDLRDLNAGGAFELQRIRDPWLTKRLKWISLSTWTLAQILTEECYRSETLRNAAKTNVRARRWFVRDWRSSYYYPDVGLIVLDLWSGDVGKHDD
PC9H_000054	CDS	scaffold_1	210057	210843	+		hypothetical protein													MSKHAKVLSRRSHVVGQKNAKSQNPLIGSISTRPPSGLDAIEELCCDFGDSRGWYNGARLSVTPPSSKPIDVDANTYTLGWLPYLIDDPLAIDGAGILIGFEDGHLIGEDLKHKQAMYLAANTKGNSYTYVYTPNGSIVYRLWKHDHRDDYVRHSQVERSKDAICAGEFRVSQAGHIESVVLMKNDSGEYDKPTGGKCLARISEKLESMGITTNDIDWYWK
PC9H_000055	CDS	scaffold_1	211271	212425	+		hypothetical protein													MYPAHHTRTNRSINFDKRQIRTLGNFPGFTGFGVIKNLMLPRPFPALDTVFSSIFPGHNLAAAASFNKPALGRLGTLPTELLVYIFNLSDFDGAAMLGATHAHLFVIGYASIRARIQSVKPRTSWAYDRIICFGDWACTLPHGFLSDAEKHRLMRWRIAHKDTLDIGMGAPLDALPERTETETAEEREERKHEVAGYEDQSFHLAAYASGMLRYELNSSSSYPSLSAKLVRRAHTSPVDQRRIRGLEDTLWRVADRELRSPRDDELREAVLVNATKREFVWARGREEGGRGEMTIEIALAVLTIWAGEDGDGEPDEKRYTLEGEWAGDRLAIVSQEEAERLMQTEEGWTEKKVKWEDTWLCDL
PC9H_000056	CDS	scaffold_1	214670	215645	-		hypothetical protein		PF14521	IPR024079;IPR029463	ENOG410Q33J			GO:0004222;GO:0008237	SignalP(1-22)		M35			MFSKSALLTILTISANCLAALAQPAGAALSERNADAPNNALANFPGCDAKQTETLRRAIPVAQRYQTEAWEYVWDSIPVGISHSYTHIAVVVRYFRKRGRNPPAPNTDMKSYTIWFGAYSPARYTIVYDRFERLSAYPLDQWSFQCMDSTDPDCGGMIDQYWTNAYSLPMGLDPHTRIATIRICKGFFNLLRSDDDNGQSIIHEASHFHLNGVAGTNNGRVEEDYGTTGCLALAKAHPDQAVDNADNYGYFAQYPDGCGKCYIQ
PC9H_000057	CDS	scaffold_1	217298	218188	+		hypothetical protein													MKTTVRASSGVWQPTAPADAGHNADNYAFFADYLDRATPSSHSKLMFNYLNSNSVVHLRDQGWDVPHQYHRSVDVPKMLTSEICLCLKLAIPIPTATERSSLGRWVVVELINHNGAFNDIAGNQVINTYHNPQIVTIESSRGGRCTVDPSLTTESISLPTSEPFKSFVALAVDVQRALFPIGYIVNEPGVFDPLKDDLMLIIKSAAFLSRNLELVQGNPYFPSLFGGDMMKTRCFMYSESLKRSLDEIRRYHDGLKFTLIVPIWRRGVGTLILRT
PC9H_000058	CDS	scaffold_1	219412	219895	+		hypothetical protein													MPRDTTKSLPSRPPPAPYPARRPLPETRTPTKEQATPTKPKSSAQARSKTNASPSRGAAALFIPKSHGRGAAVEGVQGSPSRTRRTIQSMRLELANRPFPAPAPPVEGLRGKDYTPSDITSPDGKKVLKKTLRPEPKCKTALKRFDSIMIMEAPREKGRA
PC9H_000059	CDS	scaffold_1	222717	224231	+		hypothetical protein		PF11327	IPR021476	ENOG410PPAV	S:(S) Function unknown			SignalP(1-19)					MKVIFQLVPLLAAALHVSAHGVITAVSGTNGVTGAGFGVVATTPRDGSRRNPFQQDSSIIRDKEISSGKADVCGRTLGGGVNNVQTMLAAASTAGLPTAAPDGSVQMTLHQVNGDGAGPYTCQVSADATGQNFVAMTVTTQVPGKNSRSNAKATDFPLVAQMPAGMTCTGGPNGDACLVRCRNAATAGPFGGCVAVTTADSANVAPAAAAGTATGVAATGAAAGSNVANGAGVVAANGANGVAAAAAPAGAALGNAGTAVAGTGAAAGAAGNAVAGAAGTAAAGLSGTAAGGAAGGVAGTAGSAVAGLPGVASSGNGGAAIAGDGGITTGSGSANGGAAVSGAGATGSATQAGATSGRTFANAQAGKAGFARAISRTQKKVVQAEETAIPDVSLEEADA…
PC9H_000060	CDS	scaffold_1	224507	225050	-		hypothetical protein									1 (o68-88i)				MPPHRSKHQKHSRRAYVVRDRYHPYPRPDYTNSIMRETASEQYNELEPPLRERNVEPEHEVVVGERRWVGIVLKLVVALMIVLACWAVKMALSTESSSDGDDPIAGEEA
PC9H_000061	CDS	scaffold_1	225868	228696	+	NUO78	NADH dehydrogenase (ubiquinone) 78K chain precursor, 5-prime end	EOG092R03LT	PF00111;PF00384;PF09326;PF10588;PF13510	IPR000283;IPR001041;IPR006656;IPR006963;IPR010228;IPR015405;IPR019574;IPR036010	ENOG410PH1J	C:(C) Energy production and conversion		GO:0016020;GO:0016491;GO:0051536;GO:0016651;GO:0008137;GO:0009055;GO:0055114;GO:0042773						MLRIASVVPRPTSTGLIGKVVGSQTNIRSISSTSSRQADITLTVDGKEVTVPQGSALIQACEAAGSTIPRFCYHDRLAIAGNCRMCLVEVERSPKPVASCAMPAMPGSKVWTNTPLVHEAREGVMEFLLANHPLDCPICDQGGECDLQDQSMRYGSDRTRFHEITGKRAVENKDLGPLVKTSMNRCIQCTRCVRFANEVAGVEELGTTGRGNDMQIGMYVEKTMDSELSGNIIDLCPVGALTSKPYAFHARPWELKNTESVDVMDAVGSNIRVDSRGVQVMRIQPRTNDDVNEEWISDKTRYAYDGLRFQRLTTPLIKQGDRFVPATWEEALLAVSNGLAASGAKGDEIQAIAGHLADTESLVSLKDLINKLGSDNLALDQVGGSSAPVHGVDVRSNFL…
PC9H_000062	CDS	scaffold_1	229165	230259	+		hypothetical protein		PF00651	IPR000210;IPR011333	ENOG410Q320	S:(S) Function unknown		GO:0005515						MEVRTASPPFDSSLADVILRSADGVHFHVVKAILRLASPIFNDMFTLPQRIPDADDVELSNADPTKVPQESTFQNPQIPIVDMAETSYVLDRLLRYCYPTVCPRVTDLQAYCETFAVARKFEMEFACQMLTRDFPGLDKAISDGPMKAYTLACKYRLGDVASLAAKEALRKSLDDLLAEDVDIDDMSTQEYDAILQYHRKCRIMCRDLVSQDDFRWLQNGGAYGLSICQCETSSRSFRVRFGATLASVTALPSTITPPHISAAAASFNLRRPKWWFDHIDKIADVFKHKSPLAPEIFDVSPTLKIIESSRCPHCQKTGPEELRTFTADLQREINDIATKGIPLNIAF
PC9H_000063	CDS	scaffold_1	232837	233481	+		hypothetical protein								SignalP(1-19)					MRLSAVFIAVATVVSGVRAGSINGNFSGNLEKALITEFGLDIFNGLKEKKCQPVPCALSVGKATPCVLTAVMGQKLLDIPACFNSDGNEFHLLCHCLDCYVKAIKDVLNNSEINYCPTSVISPDLFSRVYLNLASDEEKSKAKAWGFTPPPTTED
PC9H_000064	CDS	scaffold_1	234335	234944	-		hypothetical protein													MPRDKTGSLPYVPSPSPYPQLLPAAEIHEPTKRSAGSFRRHPTPGAPPAGGSPSSISKIHGRNSPTVGGTRGIQSVESPSDSLPFRPRTPVETLRYKLTNRSPIPSRPASPLHQNLRGDHHPADITTPDGKRILVRTLNPDLPPLVQYVPPGQIRNARALHRAQDGYSSSRSRSSSPVKGGRARLEKTMAELNRKAKQHKQV
PC9H_000065	CDS	scaffold_1	235572	235987	-		hypothetical protein		PF14521	IPR024079;IPR029463				GO:0008237;GO:0004222			M35			MAVSESNQLDGATNTASIEVCKGFWIRNALHKDDKLNVDAKGHTIFHEATHFHYTDHTGTDVPGTNHELKEDYEESFSRGLAANRPADAVQNADNYAYFAQHLDKIIP
PC9H_000066	CDS	scaffold_1	236153	236534	-		hypothetical protein								SignalP(1-22)					MFSKLSTILALAIFAGSSVVMGHPTESNIVGRNVDAKDSLSFADEVDANFPGCDTTQQATLQRAIDLLPTIRTPSGSER
PC9H_000067	CDS	scaffold_1	238473	244004	-	CFT1	mRNA cleavage and polyadenylation factor subunit	EOG092R01L3	PF03178;PF10433	IPR004871;IPR011047;IPR015943	ENOG410PFX4	A:(A) RNA processing and modification		GO:0005634;GO:0005515;GO:0003676						MGLHALHQEILPPSGVEFVVSLKLTPSTTQSSGIDDGTKVLCNVVVARTNLLRIFEVREQPPPTHSDEERDKKAKVRKGTEAVEGEVEMDEHGEGFINIAQSTGQKAAGSPTVTRLYFVREHKLHGIVTGLEAVRTLASIDDHLERLVVSFKDAKIALLEWSEPINDLQTVSIHTYERAPQLLSFEPSSFTAKLRSDPESRCVALSLPKDAIAILPFHQSQVDVDMLDPDPAQIRDIPYSPSFILDLGNEVDDSIRNVIDFTFLPGYNNPTLAVLFQTQQTWTGRMKEYKDTTKLMIFTLDLVHQHYPIISSVTGLPYDAFALLPCATLFAGVTILTGNAVIYVDASRRVALPVNGWAPRSTDMPLPNLSADEQTRSLHLEGSRAVFVDDKTLFVILKD…
PC9H_000068	CDS	scaffold_1	245273	247866	+		hypothetical protein				ENOG410Q49D									MFATVNPTTLPTPGIGGHGYSAKSFAMQIPKGFRIFKHPTMTSFPYASATAKFDVGYRPSTFSMGGDARPNPAWSSQRQDVDARMFSTGFYNHIQPSIATASLSSNMRTYDTRSGNTLPYYPIYQDPTKDTYIYERSDTYSLSEIDTPPAASSAFSPALSTDSTTSVKSSELPDRSLSRSSQRAVGPSGGSASSNPSAIQRQPSSSATSTSNALSIVRVASSRGSSQPESTIISSHSSASSANERPRTPNYLSQPAMRPTGQPLGNQYTNGFQAAPQMARVQSNSWKDYVEESMLDQSSETARLNATLNARASARASMLYAQDELPEDHTDYQSIPQVPLPPDDVGQYAPVMSSSPDSYFPHAADMGSRRTSPVSPNQPRQQPRRTSPQQTHVSPTGSL…
PC9H_000069	CDS	scaffold_1	248445	249173	-		hypothetical protein													MPLSLFKKVVSLFMPRISWLIPTYRPVHRYWRWLCHSTIPSDCNSGDGHICQSCSDPASKEVSGAKVTAAEEKQSRRLPDSTNIESDNDNRCSQHGLRGDDQQQHHRSSLMVDSFESLETLNEKRGGDRTKSSSNYRNPGWRPRNQTSPFPTCFHSDCTLQRQVPHIACRDWSSSHQRGLVRVTTFAPKLRCEPSDESRKAIKNAAVAPRFRPTDDGYRRGSW
PC9H_000070	CDS	scaffold_1	250399	251753	-		hypothetical protein		PF11327	IPR021476	ENOG410PPAV	S:(S) Function unknown			SignalP(1-19)					MKFIYQLVPLFVAALHVSAHGVITNVSGANGVAGQAFGVVATTPRTGSKRDPFQQDSSIIRDREISSGKAGVCGRTLGGGNNDVQAMLAAASSAGLPSVAADGSVQMTLHQVNGDGAGPYSCQVSADATGQNFVTMDVTQQVPGIASISLAKATPFPLVAQMPAGMTCTGGPTGDACIVRCRNVAIAGPFGGCVAVTNANGGNATAAAAGTAAGVAGTGVVAGTAAGTAASGVAGTGVGAGAPGAAGTAATGVAGTAAATGAAGASIANANGAAAAAKVGAGGTGIGAGVGSVVGSLLSKAGDAAGPLADVAGLAGIARALTKSQKQQQVSDVEDINDISIEEAEAALAKDLDRRQRVRRSRIVGRLAL
PC9H_000071	CDS	scaffold_1	253602	255718	-		hypothetical protein			IPR032675										MFFKAHDFTIKDSTFNDIAGDQHITTVTNTYHHSQIVAIPSSQTATPALTSITPIQDAIPLPTSEPFSSFISLVIEIQRALSPIGLLVDEMGLFRPLEDDLLVLIKSAAFLGRTLEILKSTGIASLFGAKTMANRLAMYTIPLQKAVGEIRRYQDGLKFTLIGPIWRRILWSAVWTMSSDADISKIVTTIRADLAHIRHPTTTYLRKLNLNLWWSVVERLPDHVVSELDSLRTTASKELPAINEAEIQTISIDFGPQCDTIELSLSPYATYQSLAMVLKYNCDHIVGDIAGFLDPSNDQVVELSQFEELVTSRSRHWHNGPAIVPIWSDNCGVYFEDQTDLCPYCGSPGEKNGLWIQCTWCKRQHRAVSQGASDDGTSGSRVLLPERARNLYNRNPMGY…
PC9H_000072	CDS	scaffold_1	256724	258416	-		hypothetical protein		PF00651	IPR000210;IPR011333	ENOG410Q320	S:(S) Function unknown		GO:0005515						MSTDAQAEQEITTTLSKALEPFDDQHADVILRSCNGTDFYVYKSILSLASPFFRAMFSLPDSHNTNPREGNKPVVDMHEDSTVLDPLLRFCYPTSPPKLSSRKIFDDVLSAAEKFEMQLCERIASSYIVDNIDRRDSPLECYALAHRFALRKLAKESARRCLELSLDKIVDLGRDADLSHMSSKDYNRLLHYCRECRDACQGFVNGQDFSWLSGPPASEYVFTTCTACKADSSRRRNSWISIQLGPRSRKDIYGKAWWFGHVERIAKAFTASGPGPLGVVKAIDFSEAMTDADPCDSCRSSAIKDLQNFSVALDRQINIEIDKPFDDENADTIFRFCEGVLIIHSSIFRDMFSLPDVPCVSQQECDKPVVDFQEPSSTLDTLLRFCYPAQVYPKISSKK…
PC9H_000073	CDS	scaffold_1	258857	259900	-		hypothetical protein		PF04193	IPR006603;IPR016817	ENOG410PJ42	S:(S) Function unknown				5 (o47-68i80-97o109-126i138-160o215-238i)				MTSITRNLPSFVKDLGVAVVGEKCYISLVENLEFGDVPCLKFAVSKVLGIGIVVGGSIVKVPQLLLIVNAKSAQGLSLESYILETLSYAITLVYSFRNELPFSTYGENLFLTIQNTLITLLIIAYAPSSSSRTPAPLAISTLVTAFAALARVPSGVLSYLQMATVPLSLASKLPQIIQNSQAKSTGQLSSFAVVAQIVGCLARLFTTATEVGDPILVAGFGMALLLNCVLGAQVWMYWGTKAAVEAKAKVKVGEVKAEAVEVAPIAEKIADKVKEEETAYSTTWTPSTPKNMQRMSTPPPSGGRKWARKVD
PC9H_000074	CDS	scaffold_1	260600	266766	+		hypothetical protein		PF00005;PF01061;PF06422;PF14510	IPR003439;IPR003593;IPR010929;IPR013525;IPR017871;IPR027417;IPR029481;IPR034001;IPR034003	ENOG410PFN7	Q:(Q) Secondary metabolites biosynthesis, transport and catabolism		GO:0016020;GO:0016021;GO:0005524;GO:0016887;GO:0042626;GO:0055085		12 (i673-695o710-730i751-777o783-800i807-831o922-943i1358- 1375o1387-1405i1426-1455o1467-1485i1497-1517o1617-1638i)				MECNVVTSPVGDNNPGIDYFDPTGVAELRRTLSASIPVAHHHHSIPDQPPLSTQDHLGHRDGERSNKVPTHSIAASSNETTVAFEGITDNAERQDDRELEFDFDLALQDYIVRRESAGIEPRVLGVLFEELEVIGLGASARHQPTLGSLFNPMEIWRGIQKKRHPPLKSIISGFEGVVRPGEMLLVLGRPGAGCSTLLKTLTNQTDSFHAINGDVAFSSLTPDLLASRFRGDVQYIPEDDLHFPTLTVEETIRFAARCRAPAGAARVPKGGPEGEAEGPARNHIIGARTREEYEKTLTEVYLALFGLRHVRDSVVGDEKLRGVSGGEKKRVSIAEAMAARALVSAWDNSTRGLDSSTALSYLMALRVATTHLQRTTMVCLYQASDAMYALFDKVCLIYE…
PC9H_000075	CDS	scaffold_1	267706	273968	-		hypothetical protein		PF00005;PF01061;PF06422;PF14510	IPR003439;IPR003593;IPR010929;IPR013525;IPR017871;IPR027417;IPR029481;IPR034001;IPR034003	ENOG410PFN7	Q:(Q) Secondary metabolites biosynthesis, transport and catabolism		GO:0016021;GO:0016020;GO:0005524;GO:0016887;GO:0042626;GO:0055085		12 (i728-750o765-785i806-832o838-859i866-886o977-998i1410- 1427o1439-1457i1478-1507o1519-1537i1549-1568o1669-1690i)				MECNIVTSPIGDNNPAIDYFDPIGVAELRRTLSASSPIAHHHTGLSDRPPLSITQDHLGHHDGDSQGRLNGQNVPAHSITAGSDETTVAPSEASNDGVERQDGQEVGFDFDEALRDYIIRRESAGIEPRRLGVLFEELEVIGLGASARHQPTLGSLFNPMEILRGIQSKRHPPLRSILSGFEGVVRPGEMLLVLGRPGAGCSTLLKTLTNQTDSFHAVNGDVAFSSLTPDLLASRFRGDVQYIPEDDLHFPTLTVEETIRFAARCRAPAGAARVPKGEPEEKAEEGQASENSKHIIGAHTREEYEKTVAEVYMTLFGLRHVRDSVVGDEKLRGVSGGEKKRVSIAEAMAARALVSAWDNSTRGLDSSTALSYLMALRVATTHLQRTTMVCLYQASDAMY…
PC9H_000076	CDS	scaffold_1	275641	277092	-		hypothetical protein		PF00172	IPR001138;IPR036864	ENOG410QDN9	S:(S) Function unknown		GO:0005634;GO:0008270;GO:0000981;GO:0006355						MLYQAPITPFDGCGGGQTRSDSSRVYYEHGRLLQSYPARRDTFFNSGISIAATKAHSNPRSTIHSCFSIVPDDCCTPEAVSPPPAYAPVDNLAYSSQNIPEYPAGVAGSSMNRSFWTSSPDDYEVIDSSDGYGGNHLITMPPTMSPMRIPGSGVSPSTTTHVHSTNAPLNNYSDNHGAAPKHQFERRSGVPSETALRSHGWGLDSADADVYGSYNEPVGPPSPQHEPVPLSSRSTYSTLAANIPYVSQTFAMPSPSSKTLGGATPPRRPSPLKTLEAARSWPRQLTPPPYTKGHATAHSKDPLLEFTPPKLSTIKKNAEKKQILACLFCRERKIACGRPPEGSEDPTCNQCARRSHKCEYPTESRRGLHRRAAYRNNKAHDVNGFN
PC9H_000077	CDS	scaffold_1	278651	282653	-		hypothetical protein		PF07971	IPR005887;IPR008928;IPR012939;IPR014718;IPR041371	ENOG410PIYN	G:(G) Carbohydrate transport and metabolism		GO:0030246;GO:0003824	SignalP(1-23)			GH92		MGRSRQKMAVLVGWLAYCGAGAGKVFISDPASFTNLFIGTTNGGHVFPGATLPHGMVKAGMDTDSPGNHAGYDADPQFNVTGFSQLHDSGTGGAVPLSNFKIFPFAECSSFDKCATSLDGRKTRRKILGNGSPDDFASPGYFATNLSTDIRVELTATRRTALHRYTFPPSSVRPRIAVDITNDGQRSSTNPSMVLDPETARVKGGASFAASFGPGRYSAFTCVDFKGEGFDLRKPMEFGAWLSDFPVQGMTDLRQLYTSFVDQLGALFTFSQPSDSRPTIILVRVGVSLISADQACANAEEEVPDFDFEGVHRAARQAWNDLLGRVQVDPTGVDTETVSLFYSSLYRSHISPADYTGENPKWNSTEPYYDSFYCNWDTYRTLYPLMSLHDPATFARIVR…
PC9H_000078	CDS	scaffold_1	283727	285047	+		hypothetical protein		PF00106;PF01370;PF08659;PF13561	IPR002347;IPR020904;IPR036291	ENOG410PICB	Q:(Q) Secondary metabolites biosynthesis, transport and catabolism		GO:0016491						MASQSKGFVINFAKKCVVVTGGNRGIGYAFTRAVAQAGANVAIIYRSSKDAEAVAEKVANEFSVNVKAYKCDVSDTDLVNKTFQKIDDEIGPITGLIANAGVSVVKPAFELSHEDFSRVYDVNVFGVFNTARAAAKLWVDRKHDGGSIVITSSMSSRIINQSEQNTPLTQVFYNSSKAAVSNLTKGLASEWSPYGIRVNALSPGYVNTDQTSHMDKNIRDHQASGIPLRRFAEPHEMTGQALLLLSEHATYMTGGEYFVDGGQLIW
PC9H_000079	CDS	scaffold_1	285388	287467	-		hypothetical protein			IPR011009;IPR040976	ENOG410Q32H									MDTVAGLWVGPCEVDKFFELTMPLGTETQENLPGIKPDFFAGLKPTKESDLYPRLVSYFPYNENFPEIKLVDTSAHPDPDSKPGAKVRPDVSGYDNNLEIDENPPTRLGDAQFGVEVKDTQVEPFHDGDRNLETIDGAPFETSTDIGKRTRGQLVTYAVEFCGRQHRTHLFLVYIYFPFARFIRFDRSGALVSKRFNFTKDCTPLIRFFHRFSKMTLAERGYDPTVRVASKKEYAYARALLNDWAPQHERPVFKMDVYDSKTNRIRQFLVWGSLADPESPLGRATRGYPAVEVTNGLLPGAQPMFLKEQWHSTALGQEIDTLRELNKEGVPYVPTLVCGGDLPGQTTRTQDYVSEIERRGDKHIECRVHVRFVVSEVGFPIERFSSSKQLFQVVYHAFQ…
PC9H_000080	CDS	scaffold_1	287824	291008	+		hypothetical protein			IPR011009;IPR040976	ENOG410Q32H									MPAKPDVFSPVSVEESVAQTKGVMRDMARETKGSWIGPCPVDHFFESMRISENDELTTQPGIPATYLQGMHVSCANDLCETLNTLINGAADYASPLPDYFMVDAFNHIDCVEDRAQIWPSSGCIEKGLVSKGTPKVVDLVVIACQGKSTDIVDDTMECTKPLPHDDCQAPYEINDTASTLIRGRLANYATQLSRSQHRTHIYMVYIFHPFVRFVRWDRSGGIVTKRVNYMKNSTPLMRFLYLFGRSDKAGRGFDCTVQHATPAEAVIAREYLKRWAPRMTHPVFKMNVASIDGGDFRQFLVWNTLAEPESSLGRATRGYPAVELINGVVSQKPMFLKDQWRDAKGRSEVETLLKLNKKTVEHVPTLVCGGDLPGQETRTHEIGDGDWRVGHNLIDRRVH…
PC9H_000081	CDS	scaffold_1	291234	291852	-		hypothetical protein													MLSLGTTFDRELNPLPIGYALQLSSNLPLKLCLDLQSGFGDASEDEDAGVPLQWDIVRKLISQIPRTSHLAVRLFWYHAEAFISELMQEAPLLVHMEIDGEYGYNSVILWTPTSPLSTYGLELLNNLKINGKHVREDIQLEMKCPAL
PC9H_000082	CDS	scaffold_1	292088	295063	+	PLC1_1	Phospholipase C		PF00168;PF00387;PF00388	IPR000008;IPR000909;IPR001192;IPR001711;IPR002048;IPR011992;IPR011993;IPR017946;IPR035892	ENOG410PJKK	I:(I) Lipid transport and metabolism		GO:0004435;GO:0008081;GO:0005509;GO:0035556;GO:0007165;GO:0006629						MADPQSSPLPAFDVSLSVPEQFKTGVVFTKINSDRKQKQVKFRLDVDQGQILWESKKYGAVLVETIKEFRTGSNAAYDLAQLGLQFSDLPRFISTIYIRSGSYKTLNMLAPTPEILRQWENAVRALYTTRRDLMRGLDNVEMREAVWQKMYWKGADAGGDNKLDLKEVENLCLRLNISAPPTVIKKLFDEADSQRTGFLDFESFKQFVKSIKRRPEIDALYARICDGSPSKIFDFQAFEMFMKGQQQSDCSADTLKAIFAKYATQPVEGQVPVLSTTAFTTFLLSSDNAVTASASGSHQVTQNMSHPLSHYYISSSHNTYLIGHQLIGESTVEGYIRALLAGCRSVELDIWDGGDNEEPVIKHGNTLTSDIPLRDICDAINRYAFVASPYPVIISAEVH…
PC9H_000083	CDS	scaffold_1	295300	300026	-	PLC1_2	Phospholipase C		PF00168;PF00388	IPR000008;IPR000909;IPR001192;IPR001711;IPR002048;IPR011992;IPR017946	ENOG410PJKK	I:(I) Lipid transport and metabolism		GO:0004435;GO:0008081;GO:0005509;GO:0035556;GO:0007165;GO:0006629						MTALENDIGATMDGTFVRRRSLKRAANLSSANEELVSVSRSPPSSPGHGIPNGGGGREGDLASRKRGEKLGASIKRKFFKAFVRGTSAGAQVDAHHAEAAHHGQLDASVRARAPRLGHTRSLSDQTASVSAKPTIVHSHTIPEEPTHMPSFSKAAVAISQGGAGATNSLTLDTRPLPQYTSHSTTSPTNDSFLAPPLKHNLTVDGDLPPTLESEALFSDGVADQLLADAAVPAILQRGLLLTKLSEKRTFDLPLDTFPFGKNSSVFSGRRLKRVLVRVDPDQGQIVYESGEDLVDDAGRGADGAPIMPGPAPKEARVIPIEAIREIRMGADAMASLAKGKPLEDDHDLASPMAATFPLVHTPSQHRPPYTASQSAPAVAGALDIAPPSPRSAPALLHSA…
PC9H_000084	CDS	scaffold_1	302294	305231	+		hypothetical protein		PF00646;PF12937	IPR001810;IPR032675;IPR036047	ENOG410Q382			GO:0005515						MGVIDNLPIELFSLVLKYLVYHDIGTPGNYQWYGDPVVLDVLSVAQVCKKWRQIALKTPSLWTTLNDVLHPFVIEYALEQSSNLPLKVCLDFRWYFIGSDDEDSDEDGFGHNGGDEIQWQAVQKLASQIPRTSHLVVRFHQGYAYSLIPFLSQDAPLLEHFEINNQENPWSNFEPLILPPAIFNGKCPSLRHLVLRCSEIQYDSPILLNLTTLMLIWSTLESSSQLLQMISKLKYLETFYFTGMFKTEDSGNLGTVVLPKLRQLSLIDIDDADVCTLLLTHVKCPYASLRIILRLKPTENLVDLFRACKRWLSFHDGHGVIDNIKIDGGHVCEDLQLEGFSSTEPAFRFSITVSEEVEPEDVDSDDEDDVIELDQIITVALSELPLDNVHTLHFYTMVR…
PC9H_000085	CDS	scaffold_1	305472	307692	+		hypothetical protein			IPR011009;IPR040976	ENOG410Q32H									MSPNSPHSPPRHVNSLAMYQSTPLKFKASGYKAHKIETAGFQENRKAMCKEMTGFWVGPCEVDKFFELTMPIAADTQETLPNIRTDFFSGLKPSKEKDLYPRLVEFCGEDNENFPEIKLVDTSAHPDPDSKPGAKVRPDVSGYDNNLEIDENAPTRLGDAQFGVEVKDTQVEPFHDGDRNLETIDGAPFETSTDIGKQTRGQLVTYAVEFCGRQHRTHLFLVYIYFPFARLIRFDRSGALVSKRFNFTKDCTPLIRFFHRFSKMTLAERGYDPTVRVASKKEYAYARALLNDWAPQHERPVFKMDVHDSKTNRIHQFLVWGSLADPESPLGRATRGYPAVEVTNGLLPGAQPMFLKEQWRSTALGQEIDTLRELNKEGVPYVPTLVCGGDLPGQTTRTQ…
PC9H_000086	CDS	scaffold_1	308582	309152	+		hypothetical protein		PF13521	IPR027417;IPR038727	ENOG410PSPR									MPTTSIYIVGPSSTGKTTLCRALAEKLGLNSDAIVGEVAREVMRRTGFTRNDVGRLEMQRAIMEAHLLEEEKKSGARIQLCDRSAIDPIVYALLTAIDEHDAKEKYERLTDSEAFQRALMRYRNAIFVLLAPVQEWLVDDGVRNTENQLEYFGLFKKTLAELDISFHEIGKEMMGLGDRVDRVLGIAQL
PC9H_000087	CDS	scaffold_1	309464	310656	+		hypothetical protein			IPR007855	ENOG410PKW2	A:(A) RNA processing and modification		GO:0003968						MMKAIVLRSDPTKDDAEWRFTVPPRALTPPPNAKVPYIKAIQFTANAITLQFERMPMNRVLNADDSSLFILASFATLRFPDAHLGDTADYILRLMTKGLFLNDVQYRFYHHSNSQLRSRSCFMRAARSDEELDRRIYAMGDFGRIMNVAKRAKRIGLLFSGAEIDWQLDPRYVLDIRDIKSGDELFSDGCGLISRKFLVQLSKAKRIIFRGSRYTPYRGYKGVLMLHPRLDKDGQSHVHFRDSMKKFTATSDNTFSVVGYSQPYAFGRLNNEIVTLLWSLGVSKERFVAKQEAYFEWIRKASEDWRRHMWEGEHRTVSTAYV
PC9H_000088	CDS	scaffold_1	316490	321220	+		hypothetical protein		PF13087;PF13245;PF13604	IPR007855;IPR027417;IPR041677;IPR041679	ENOG410PKW2	A:(A) RNA processing and modification		GO:0003968						MPGPVAKSIRKAQLSEVSNFRKNDKNRVRMMIQKSRLLYGVCDPFQVLKEGQVHIRITTARKGPSTPLNCSVLVVRNPCLHPGDCLKLRAVECSPLSHLVDCIVFASVARPGHHAAPSMSSGGDLDGDKFFVCWDPDLVPAKVAESYDYPPNKEQTRREVSRLDLAKHFAAYNGVGLAKVASLHNKWVRASAKGAMSPECQELNALHSQSVDGARVKIPDRLLTPPEPEEPFVIEVLANAAAEFAIGFSESESSRTQLSTVDEVDARNIITGLLKSKQNALSEYELFNMVLRHSRKHSIDVYTCLSYLDMGALSASEKYAIMASLNPGPGRTRDTEAWMFNSLFRSDILTSRDLYQRNLSQPFSIQRFYSSKLSGMSTFFKYLHMATQDFTRKLLLLKT…
PC9H_000089	CDS	scaffold_1	326759	328561	-		hypothetical protein		PF00319	IPR002100;IPR036879	ENOG410PMRQ	K:(K) Transcription		GO:0046983;GO:0003677		1 (i21-37o)				MGRRKIEIQPITRKNGLFKKAYELGVLCSVDVAVIIFEERPGHHLKLYQYCSTDIHDIVQRHVRYEGEKDTRGPNDFSGNAGTRADDNVDGEDDDVDDDDTQDMGGRGAKRRGDGKGKPEWAKPSTSLSDLGMGADMDYPLSQNRPLSIPQPPPISMHGNHLHHQLPPSHPTSSTRDALRGGSSLPSQSASNKRPRIAPNVNVNTHAVSHSRSSSDDPHSGGAGPSSGYYPSSATSSYPQRHPSGQQSQHQFGANYFPMTTPPPFPPFDYPPPSSSSRGPGSPASAGGGFSNTRYDTSSRGMGSRPHQSQGGGSGFPGFLDADEQARPPPNPSFKFTGLDWPVHSQSSGQSAPQPAFARVNGVGVAPSSATTSSSAGPEPNSTWFDFLASSSNSRSDIP…
PC9H_000090	CDS	scaffold_1	331833	334299	-		hypothetical protein			IPR011009;IPR040976	ENOG410Q32H									MSLPFQSTPPRKQTTLDLRRAESQATPITRKESGAQGQKIELDGFEKKREAMCREMSGRWVGPCKVADFFRLTMPIELKKGSKEQLPKINKKFFAGKKPASEKAMVKKTIEFFGTDNFAGIQLVDTSNHPDPNSKRGAKLRPDISIRDKSDVIDPNSPTQLDETPGGLEAKNYVVDILSDKGPLFESETFTAQQARGQLATYAVELCARQHRTHLFFVYLFYPYARFIRFDRAGALVSERFNFTLDCTPLIRFFSRFSKMSRVERGYDPTVQVADEPETKLARERLKEWAPDPKYERPVFKMEVYDHQSVNGAKMPNPRKFLVWGALAGPESPLGRATRGYPALEVTHGLDQAKEAPLMFLKEQWRSIALRPEIDTLRELKDKEVEHVPTLECGGDLPG…
PC9H_000091	CDS	scaffold_1	335379	336362	+		hypothetical protein		PF00651	IPR000210;IPR011333	ENOG410Q320	S:(S) Function unknown		GO:0005515						MGEGEKDIASSPFDDSEADIILRSSNNVNFHVYSVVLKLASPIFRDMFSIPQPATQTETPVVEMEEDSTTLDIMLRLCYPGPDPRVTTLARLTSILRVAEKYDLDGVVEKMGCSYAELVDFEEVPIEAFAMACRYRWKEVALTAAKASLGFTTDELLHQEAEALKVACNNVTKHIEWVGYYTSTGRFEVYSFERHASNTVPKPKRCSDVMQLGYRAFPSWWCNYMQEIGKEFMLQGPTSVCLIDSSILKTISASECKSCKDVANFGDIYRFLEQFRDRIDSTIKSVKLELSF
PC9H_000092	CDS	scaffold_1	336555	337532	+		hypothetical protein		PF00651	IPR000210;IPR011333	ENOG410Q320	S:(S) Function unknown		GO:0005515						MREANQDVASSPFDDPDADIILQSSNNVNFHVYSVILKLASPIFRDMFSIPQPATQATKPTIKMEEDSTTLDMMLRLCYPGPDPLVTEYKQVTSILRVAEKYDLDGVVEKMGRDYPQVLRVENSPVEAFAMACRYRWKEVAISAAKASLLYTTDELLELEAEALKSITGMDYHRLFQYHHACRQACQNLTTQVDWMFYSSISIDSYSFERHANSATPKAKRCSDVKQLRYRNFPSWWCNYMEGIGMQFMLQGPAAVRLTEKTLQDAVSSISGCKLCKDMDNFGDMYKFLERFRTQIDRAIASVELELSF
PC9H_000093	CDS	scaffold_1	337808	338681	-		hypothetical protein			IPR000719;IPR008266;IPR011009;IPR040976	ENOG410Q32H			GO:0004672;GO:0005524;GO:0006468						MEATFQDKKQRHTGSATLVGIGHKHIYKRVHTRFVVAEVGSPLEAFPSSKVMFGAIHDAFQAHKQAYEECGIIHRDVSGGNILILDNNEGLLNDWDLAKKEAEDQDATLVPDRTGTWQFMSFGLLQDPYKRHTARGDLESFFWLVLCYGLHYLSHSFTKNVPAIMADIFDKFTFTHPDGVARGGTTKVALVTANFNNGRRPRPLIKSDAYRFSILSFAENDPMGPTSSVLVLRLVKSDDENRSSRKRRKKRCPT
PC9H_000094	CDS	scaffold_1	339444	341568	+		hypothetical protein			IPR000719;IPR011009;IPR040976	ENOG410Q32H			GO:0004672;GO:0005524;GO:0006468						MNAPPEDDLSLGQPNVPATYFKDQRVTCEKDLYKSLPPLINGKAGYQSLLPDHTLVDTSNHADPNSEKGAKIRPDLGHYEHGVVSEEHPTMLDLIILAYEVKKARKEDIVNDTMKCTKPLPHDDCQAPYENTCQTSTITRGQLANYATQICRRQHRTHFYMVFIFHPFIRFIRWDRAGAIVTKRINYVEDCTPLVRFLYLFGRLDRAGKGFDPTVQPASQAEAEEAKKYLKRWEPKLERTVFKMDVPAANGKMRQFLVWGSLADPESPLGRTTRGYPAVEVIDGVVSAKPVFLKEQWRSVAVRPEVETLKELNEHGVLHVPTLLCGGDLPGQETKTHEISIGNWRVGHKRIDKRIHTRFVVAEVGQPLENFPSSKVMLGAIYNAFQGHDQAYNKCKIWH…
PC9H_000095	CDS	scaffold_1	341743	344446	-		hypothetical protein		PF07690	IPR011701;IPR020846;IPR036259	ENOG410PFT2	G:(G) Carbohydrate transport and metabolism		GO:0016021;GO:0055085		12 (i57-74o100-120i127-146o152-175i187-208o220-243i308- 329o341-361i373-391o397-419i431-448o468-488i)				MLMRTPRPSSVEKDNDSREEKVVSESSEEGLDFGGESRLPPPPVLTSEQEAKLWRKIDLRLMPILSLMYLFSFLDRGNIGNAKLQGLTTQLNLIGNEYNIALTMFFIPYCIFECPSNLVLKRLRPSRWLPGITVAWGTVMTLMGIVKTYPQLVGVRICLGVAEAGLFPGVVYYLTLWYPRHMLQYRIGIFFGAASVSGAFSGLLAFGISFMSGTKGLLGWSWIFILEGIATVAVGILAFFVLVDFPVSAKFLTPEERAFVVWRKSMSFSDSYSLKVRSSSTEYDSSSVGEEERFAARHIWAAFKDWQVWLHVFVYLSVITPLFGITLFLPSIINSFGHTAAISQLLTVPPYVFATIVLGFFAYYSDKLRLRSVFILAGLLMCLVGFAINISDAPSGVKY…
PC9H_000096	CDS	scaffold_1	345835	348418	+		hypothetical protein			IPR011009;IPR040976	ENOG410Q32H									MLTQEVEALVSPPRKRTIDPALVQATPVSRKYSGIIQTQTLDPDDFKKKRAGMCQEMSGYWVGPCEVDDFFELTMPLDLKEGEAEELPNIDEKFFARKKPANEDEVYAEFASFFMKTPEESHFEGLKMVDSSRHADPDSKAGSKVKPDVGIHKTDDASVTVATPTRLGSALSPAELKKRLLELFNDLAKKLGVSFEIDTDEARDARGQLATYAVEYCARQHRTHLFLVYIYFPHARFIRFDRCGALVSTKFDLSQDCTPLIRFYSRFSKMTDAQRGYDTTVALASDEETKLAQERLKEWEPKHERPVFKMDVYDDKVEEQAEDNDEAHIKAEVCVNDADVGPKTIQAADNDIKETPKPRKFLVWGSLADPESPLGRATRGYPALEVTDGLEKAKDAPIV…
PC9H_000097	CDS	scaffold_1	350278	352365	+		hypothetical protein		PF07690	IPR011701;IPR020846;IPR036259	ENOG410QDXM	U:(U) Intracellular trafficking, secretion, and vesicular transport		GO:0016021;GO:0055085		12 (i33-56o68-87i99-122o128-149i156-175o187-207i256-279o291- 315i336-358o364-389i401-421o427-449i)				MTTEETPLLRAEHISVDHDNVYDRFSPWKKRGILILVSLSGLLPLFASGTFIPAIPQIAHDLATSPEIVTFTISMSIFGAALGSMAMATYSGFYGRRPVYLAGLPFFCLGSYQIAVSQNIYYLIAWRFIQNVGISGGISLGAGVIGDIYKLEERGFAMGVFFGAVLLGPAIAPVTGGIATHYASWRMLQWGFLIYGLALLISMALWLPETSHPGTLGAEKAEDQQPQSNGGTRRQKWRWVWLNPFSCLGLLRSPNLMLVMLAGTAALVTDFVLLVPLAYTIGAKYGITNEALIGAVFIPCGVGNMVGAPLAGYISDRIIIAYRAKRGGDWYPEDRLRGTLFGAAFCVPLSVLFTGLTIEYVPGRMGLLLCLGWLFMNGIGAILSPSAAYNVDIVHMRSA…
PC9H_000098	CDS	scaffold_1	352432	353813	-		hypothetical protein		PF00149	IPR004843;IPR029052	ENOG410PNNZ	S:(S) Function unknown		GO:0016787						MSLRNHLKSLMGGRSGSPLLLHHDTEASTSSDIPYSPSSLTSADAIVHLEYDPAQIPAKPTQDGSWTRFICISDTHSRTFNVPDGDVLLHSGDLTPTGSVEHFKRTMEWLYKLPHAHKIIIAGNHDLPLHNDWYETNHDRWHTRGKQPLEPILDMLKGDKAKRHRIVYLQDERYEFRVDGRTWSVYGSPWSPEFFNWAFNYTSDEAEGIISRLPPTDILLTHGPPYKVFDRVKLGDNVGCQVLARRLPQLRPRLHVFGHIHEAHGAQIVDWDTTPDLANFVDDTEWDVSSDVTIHSAGSANEDIAMELQPKEPSGFTTPSETTSATDENTASGGRFTVFANAANWPSGARASRDGARVPFAGPGFQPIIVDLRN
PC9H_000099	CDS	scaffold_1	354152	358284	+		hypothetical protein			IPR041078	ENOG410Q372					1 (i102-122o)				MGVLPYYCLLMPPRDRLMDHHSLTVQRWDFVPHQLSSPTVPRLSRTVACALPAAAHLPLQPPLKTAGPQSAHSLHQVRSHPPSQSPSIAVAQYRSRSVPQSLIVPIPYVAVARLFAVAHLWASRFSPTPRCPLFLRPLIRLVVLEGWQTLVPAQQCHLKKTNRAKDTEFLAKEKLRAAQEILKARNRNQASSTSQITSLPPAVPAPNESLAFRPLDSPPSVPSYPPSPPPLDLHGAGVDSDSSRESTPGPSPVSEGDQIQPQIDDIKCNYHPSSQRPTTVHHFHEYGLNSKAQPDYIIDDEPWRPFRTRRDFEFASIALTQSLNENAVDTLLELTYGAVGRDPSRGALTLQSYKEMMNIWKLAANKMPGFTQHSVSDVYKGKVLSYDVWRRPVWDWVMK…
PC9H_000100	CDS	scaffold_1	359237	360906	+		hypothetical protein				ENOG410Q372									MPNPDSFSDSDPSDTDVAAVDLSLPGPEASPGTLRKRLEDMQLQLAALVVDKDKAARENATLVAENMDKRGRAKKSVSMSIPDADDAKELGKKLAIMCEAWSDSNSFLKPRPDLHPNSEERYSTFETYKLGITSAIYDFLPKKYHSFLQSRNDWCSLLRRKQGEGRADALKYLKRAAPLIFKEYPIPASDWASPATRASSTIIQSLLKFPGDKKYPEVPPLVYPNLEASPKRVFCNPIIGRVLRVILFGFASLDKPTVHTSTLGKLWGINELTPASLAFAVIAAVFLLSPDSSLNETGLVSLIPYREYYYKLKGTLMLHADSAPIRKAFRIHQEIVFAGITYDSAASEAVNAAPEGQHGVSSLCEALRDIDSDDDDDETILHTGTRHVELETFDLSNVT…
PC9H_000101	CDS	scaffold_1	361566	363729	-		hypothetical protein			IPR000719;IPR008266;IPR011009;IPR040976	ENOG410Q32H			GO:0004672;GO:0005524;GO:0006468						MAKKFTKKKREKLPRIDKKFFAGNKPASAEVMTQMFMEFFGRYNFPGIKLVESPARPGPDHDSEHGLKVRPVINVHEESSTMEVDGHLAGVGIDDTMIELFNDDEDDAPFEDDSYEAKRTRDQLAAYVVDLCARQHRTHLFIVYIYYPYARFIRFDRSGALVSERFDFTDDCTPLIRFFSRFSKMTQAGRGYNPTVQVADELETKVAHERLSEWAPNPRYERPVFKMEVHDDREQAGGKRPNKPRPRKFLVWGSFADPDLPLGRATRGYPALEVTDGVENAPKDAPIMFLKEQWRSTALRQEIDILRDLNDKGVEHVPTLICGGVLPGQVTQTGLYATGRSGEKEIAERAHVRFVVLEVGRPLERFSSSKEMFKAVYDAFQGIQAFEKCNLLHRDVSGG…
PC9H_000102	CDS	scaffold_1	365181	367937	+		hypothetical protein	EOG092R040D			ENOG410PRS2	S:(S) Function unknown				4 (i497-516o565-584i640-658o670-694i)				MHRRKSSRDEDDAHDIIKPSAATSVSFPDSDVDSSRTRVNSSPTHPPHINGYARPNVPSHPPSSAGPFRTAFVPARSPSLPTPNGHAANGIGRAPTSPLNNRTSPSHARTLSHSLTPTYIHSLNQPYGSAHGSAAHGPSLNGHTSAHSRTRSISTPFSPPISSPLASSFPPQSQSIPSLPTSAPPTKQSFPSFAASMAFPETEETPPPVQAPGSPKIGSGRRHARLHSRNLSIFFPRPGSLPTNSIAEDGAQEVEVHVEDIEAPVSTIPSAESNVSFPRSSRQPPTPLGAGFTFGARAPPGELPVPTAMSRSSSTGSESHSRRGHHHKHSMSHNFFSFLEPGANGHSHQGEEELHTQPTLTPVSPWTPISPFPNSATSMSPNPSPMSSVGTDLPPQTGD…
PC9H_000103	CDS	scaffold_1	368392	374537	-		hypothetical protein		PF00063;PF00173;PF03142;PF08766;PF13632;PF13641	IPR001199;IPR001609;IPR004835;IPR014876;IPR027417;IPR029044;IPR036037;IPR036400	ENOG410PFHC	M:(M) Cell wall/membrane/envelope biogenesis		GO:0016459;GO:0005524;GO:0003774;GO:0016758		6 (o916-935i955-975o1214-1236i1612-1633o1639-1660i1667- 1690o)				MNRQSTMSVHQQLEAVTDLSQLSHITEDVIVACLRERFMSDHIYTNIGSSALVAVNPHKYIASNSDAVLNKYAAEYRDTSEHKEKLPPHIFQLANNAYYHMRRTTQDQCILFSGETASGKSENRRLTIKTLLELSVSNPGKKGAKLATQVPASEFVLETFGNARTLFNPNASRFGKYTELQFSERGRLSGIKTLDYYLERNRVAGAPSGERNFHIFYYLVAGSSPEERQHLHLLDKMTYRYLGQRTAPKSANGRDDDAVRFDQLKVALKTIGLSKRLVAQTCQLVAAILHLGNLEFTIDRSRNEDAAIVRNTNILEVVADFLGVQPSALESTMSYKTKLVKKELCTVFLDPDGASDNRDDLAKTLYSLLFAWLNEYINQRLCRDDFSTFIGLFDLPGPQ…
PC9H_000104	CDS	scaffold_1	377364	377865	-		hypothetical protein													MHASSEALDTDRRIVDYPMLCGGRGISLDQGCPTKNLDFFVLFQSKHTLRAEQLINLHKKHSQTYTVPPVHIIPSDGLHSSLIAISRCYRALVNASDLDGDEDATAWMTPVVDEGAIVGETRRKKKTSAKSSHNCADPLLAYDDGRVDGVRRRKTSACQPRWRVVE
PC9H_000105	CDS	scaffold_1	378026	380268	+		hypothetical protein				ENOG410PZ51				SignalP(1-18)					MIALSLLSIPFLASLALALNDWSKPCFSGRCSYDLHGSVDGSMTIEGSPDAISDITPAAGWWIIGCDPQAEAQDIRIVCIHTDRCGHLFRNLGAQGKLVRLPEKCGKMAFARVVKSWVDDNQNVPMEVESKMQRRGADNPVRGLTLDTNFAAIDPSVTGPVHITIVGATVPGATGNATITRRAPTVIRRTKIGPRGSNFIESAFDRFTSFDLDSIKDLPPVHVNQNFPIIKKSFSCDIPGENSPSIKGSLEASIDASIHAVVQVGVAAEGTIIPPRIDSFGLFAALDADISGTLNIVASAAGTFDSGTINIFEQGIPGLEFPGILTVGPMFRLEAKASTTVEGSVDAKVGLTYRVEDAQLFFPKTDRKRPTGGFAPNNTPLKLFADPSISAKGSIGVHI…
PC9H_000106	CDS	scaffold_1	380576	382223	+		hypothetical protein		PF03171;PF14226	IPR005123;IPR026992;IPR027443	ENOG410PPKA	Q:(Q) Secondary metabolites biosynthesis, transport and catabolism		GO:0016491;GO:0055114						MPGVTLPVVPQYSPGPPTSEDLEYADLAIIDISKASTPEGRAELAVTVREAMTNLGFFYVVNHGYDQAQAARITDISDVLFAGVSQEEKEMYEGTMKTTGSYQGYKLRNYWHIDGGVRDQVEHYNINRDVTKREHPQPIRPFLPEIEAFARHNHFNVLHPILRLLALGLELDEETLVNIHGYNAPGETYVTLDPKKKKNERRTNGSSSPDVPWADFGSITILWSQPVAGLQILTPNGKWKWIKHIDNALVINAGDALEFLSGGYYRATIHRVVQPPTDQRSRPRLGAFYFCLTDDTVKLLPFVDSPVLQRVGIKRRFSDEQAPSMEAWRKGRTSAYGQTELKKAIDGVVEEEVINGVLVQHYN
PC9H_000107	CDS	scaffold_1	382756	385225	+		hypothetical protein			IPR011009;IPR040976	ENOG410Q32H									MLTQEVEALVSPPRKRTIDPALVQATPVSRKYSGLIQTQTLDPDDFKKKRAGMCLEMSGYWVGPCEVDDFFELTMPLDLKEGEVEELPNIDRKFFAGKKPGNEDEVYDEVASFFMKTPEESHFEGLKIMNSSRHADPDSKAGSKVKPDVGIHKTDDASVTVATPTRLGSALSPAELKNWFLELFNDLAKKLGVSFEIDTDEARDARGQLATYAVEYCARQHRTHLFLVYIYFPHARFIRFDRCGALVSTKFDLSQDCTPLIRFYSRFSKMTDAQRGYDATVTLASDEETKLAQERLKEWEPKHERPVFKMDVYDDKVEEQVEHHDKPQIKAEVCVNDADVGPKTIQAADNDIKETPKPRKFLVWGSLADPESPLGRATRGYPALEVTDGLEKAKDVPIM…
PC9H_000108	CDS	scaffold_1	386091	387698	+		hypothetical protein			IPR000719;IPR011009;IPR040976	ENOG410Q32H			GO:0004672;GO:0005524;GO:0006468						MPIELKKGSEEKLPKINKRFFAGKKPANERAITKTFIEFVGTDNFPEIQIVDTSAHPDPNSKSGAKLRPDLSVRDKQDVIDPNSPTQLDNPLCGGEVKDTLVEMFSDVGPLFELETFTAQQARGQLATYAVEFCARQHRTHLFFLYIYYPCARLIRFDRAGALVSARFNFTHDCTPLIRFFSRFSKMTSVQRGYDPTVQTADELETKLGLERLKEWAPDPKYERPVFKMEVYEDQKQAGGDNGAKKPNPRKFLVWGALADPESPLGRATRGYPALEVTDGLEKAKDAPIMFLKEQWRSKAIERGEMAILRELNKHGIKHVPTIVCGGDLPGQVTQTDVFANEIGRTGGKPIDQRAHVRFVVQEVGRPLECFSSSNEMFQAIHDAFQGHKQAFEVCGILH…
PC9H_000109	CDS	scaffold_1	387849	388320	+		hypothetical protein													MPLTKFVASILHKLNHWRSQARLALHAANADIILDENLPNPPSFEEHKHKDMEYIWDTTLRSCWPTNDAAKLQLVKKPQRATGQAPVEGTGGCGSKKRKSIDESDLESNDEDPKPKKVKSITSEALSHGPKERKSSKKMPSVATRRSTRLHMGSTN
PC9H_000110	CDS	scaffold_1	388731	390041	+		hypothetical protein				ENOG410Q3CQ									MTFLPQELIDIVIDHAHDQPETLRACSLVSSTLRPAAQFHLHQRVTLQPKASTTHIRAPNLQLGFDDRISTLLSTSSHLLPYTRSLIIREGAAPWLLRESLGLLTLLERLVSSATLVEVQLHNVEWQYITSPLQHALLRVLSLRSVQDVSLVECYIPTHVPWTKFVGPETKKLVLDRVKVHGDGVDPNSGSSGAVADVDRKVDTLSILAFGQPTTRLVAWIMHPREAKHTQRLKSLKLYCDRISVDPLNKLVKACTSLEYLRFEPFLFRWDHRDAFPFPITTHNHSLQTLQVSGLYTDQIRWLTSLVSDLSTSANHTLSLGTVYIDMTAQIPVLLSKDDYLHARIREIDEAATSREAPGQLDLVRLRLALPGITPDEVEKMTTRMKGFEKTLSVVKVDI…
PC9H_000111	CDS	scaffold_1	391893	394390	-	ACS1	acetyl-CoA synthetase	EOG092R044E	PF00501;PF13193;PF16177	IPR000873;IPR011904;IPR020845;IPR025110;IPR032387;IPR042099	ENOG410PGXP	H:(H) Coenzyme transport and metabolism		GO:0003824;GO:0003987;GO:0016208;GO:0019427						MAEAPEAIPIHPVASRILKGRKKPHVGPHFHAYKQAHEETVGHESDEWWAKTARDTLHWDRPFRTVRSGGFETGDITWFPEGGLNASYNCVDRWAFKHPNKTAIIYEADEPGEGREVTYSELLREVCSVANVLKSMGVKKGDTVSVYLPMTWHAVAAFLACARIGAVHSVVFAGFSAESLRDRAQDCKSRVLITADEGRRGGKTVATKAIVDAALKECPLVEHVLVLRRTGNEVPFTPGRDKWWHEETLKVPNYCPPEIMASEDPLFILYTSGSTGKPKGVVHTTGGYLLCAALTVKYVFDVHPDDKFACMADIGWITGHTYIVYGPLANGVSTMVFESTPVYPSPSRYWETVEKHKLTQFYSAPTAIRLLRRLGSHHVEKHDLSSLRVLGSVGEPINP…
PC9H_000112	CDS	scaffold_1	397611	398176	+		hypothetical protein		PF14226	IPR026992;IPR027443	ENOG410PPKA	Q:(Q) Secondary metabolites biosynthesis, transport and catabolism								MLVVEKPLPHYVPPPPSKENLEYADLAIIDLSKATTPEGRAELSRQVCEALTEVGFFYIINHGYTSAKTSRIFDIANATFDSVSDEEKQEYTQKEVGVYTGYKPMNDWHIASGVRDAIEHYNSSYPIPTLPRANAHTTGII
PC9H_000113	CDS	scaffold_1	398387	399199	+		hypothetical protein		PF03171	IPR005123;IPR027443	ENOG410PPKA	Q:(Q) Secondary metabolites biosynthesis, transport and catabolism		GO:0016491;GO:0055114						MSFKPQENPLVHEIVCSMSRLQGLDIDGLYSHPREATEEELTKSVWLKGHADIGSITILYSQPIGGLQILSRDNQWRWIKHIDNALVVNAGDAIEFLSGGYYKATRHRVIQPPADQRSIPRLGVFYFSMANDDAKLNPLLESPVLQRIGTTKYFEEGEAPTMEQWRRNRTALYGKSQLKPSEKEVGVEEEVIHGTVVKHYN
PC9H_000114	CDS	scaffold_1	399480	401098	+		hypothetical protein		PF03171;PF14226	IPR005123;IPR026992;IPR027443	ENOG410PPKA	Q:(Q) Secondary metabolites biosynthesis, transport and catabolism		GO:0016491;GO:0055114						MLPAQISPPLKAYIPPPPTAEDLDFADLAVIDLSKASTLEGQAELVQQTRKALSEVGFFYVVNHGYSPSQTARIFDIANLAFDQVSDEEKKEYARKDQAVYQGYKLRKEWVIDAGVRDEIEHYSIHRNVVAQEHPAVLRPFIPELAAFTRQNHYQVLHPILRLLAKGLELPEDTFTKMHGFDAPGYSSMRFQKYHPRADADEVLAKNVWLKGHTDIGTVTILYSQPIGGLQILSPDNKWRWIKHVDNALVVNVGNGIEFLSGGYYRATKHRVVQPPADQQNIPRLGVFYFSMANDDVKLSPLVQSPLLQREGIKKYFTDGEAPTMEEWRRERTSRYGTSQLKPSVTEEGVEEEIIHGTVIKHFN
PC9H_000115	CDS	scaffold_1	406480	407628	+		hypothetical protein		PF03171	IPR005123;IPR027443	ENOG410PPKA	Q:(Q) Secondary metabolites biosynthesis, transport and catabolism		GO:0016491;GO:0055114						MYPGVCDEIENYAVHRNVTAQDHPAILRPFLPELAAFTRHNHDNVLQSVLRLLSLSLELPEDTLTKLHDFEAAGQSAISFIKYHPRGECDAPEGNNVWLKGHTDIGTVTILYSQPIGGLQILSKDNKWRWIKHIDNALVINVGDGIEYLSGGYYPATRHRVIQPPVDQRNIPRLGVFYFAMANDSVRLSPLDHSPLLQKKGIKKYFEANMVPTMEEWRRERTSRYGRSELKPSATEERVEEERIRGTVIKHFN
PC9H_000116	CDS	scaffold_1	408173	409120	-		hypothetical protein			IPR040976	ENOG410Q32H									MAVNVEEVERGPRAHERTGTWAFMSIDLLRGERRPHKVSDDLESFFWVVLYYSLLYLPHNKVGKLDDVVPAIFEQYTFFGLGETKGGNGKLTVMEGDYIGDSTSSGSRLEFENCKPLSRFVTTFLRKLKLRRAYASLASASVPDEDGDPSDTDPPDEALPQLPASPKEHNHKDIEHIWNAALRSTSWPMEDAAKYQIVKGTEGHAPAEVAGGEGLKQSVPEYDLEGDDGEPKPTGGGGSKKRKSIPENDLQSDDEEPKLKKVKTITLETIADGPTERKSKKMPSATRRSTRLHKRSTN
PC9H_000117	CDS	scaffold_1	410407	411560	-		hypothetical protein			IPR040976	ENOG410Q32H									MSREMSGRWVSPCKVADFFKLTMPIKLRKGSIEKLPKIDKRFFAGQKPGNQKAMAKKTIEFFDTGNFTGIQLVDTSNYSDPNSKRGAKLRPGLSLRDKSTVIDPNSPTQLGEASCGFEVEDTMIEILSDRGPLFELETDTAQQARDQLATHAVGFCSRQHRTHLFFVYLYYPYARLIRFDRAGALVSERFKFTNDCTPLIRFFSRLSNMTPAQRGCDPTVRVADELETKLARERLKEWAPDPKYERPVFKMEVYDDPKGLPGDDTKKPNPRTFLVWGALADPGSPLGRATCGYPALEVTHGLDQAKEAPIMFLKEQWRSIALRPEIVTLRELKAKGVKHVPTLECGGDLPGQVTQTATYAAEIL
PC9H_000118	CDS	scaffold_1	412184	414901	-		hypothetical protein			IPR000719;IPR011009;IPR040976	ENOG410Q32H			GO:0004672;GO:0005524;GO:0006468						MSPSNTQADAATKLQAPLEEIDKKGNKLAITCAVTLFADPVARQARILLEVRPPPTSPPEPQSSTCGHNCSYIGKYSGLIEGQKLDPDDYQEKRAGMCQEMSGYWVGPCETNKFFELTMPLDLEEGAVEELPSIDPKFFAGKKPANEDEVFTEFSTFFMKTPEKSHFEGLKMVDSSRHADPDSKAGSKVKPDGGLHDEDDASVTIATPTRLGSALSGLELKKWLLELFEDLARKLGVSFEVDTIDARAARGQLATYATEYCARQHRTHLFLVYIYFPCARLIRFDRCGALVSEKIDLSVDCTPLIRFYSRFSKMTDAQRGYDPTVKLASDEETKLAQERLKEWEPMHHRPVFKMDVYDDVEEVMEDNNKAEVSTNDAGVGAETTQAADENVKKTPTPRK…
PC9H_000119	CDS	scaffold_1	415656	416846	-	CEL1_1	Esterase/lipase/thioesterase		PF03443	IPR005103	ENOG410PJHD	G:(G) Carbohydrate transport and metabolism			SignalP(1-19)			AA9		MILASALIVAVALVESVAAHGYVPQIKIGNQYIPGWNVPTDPYTTPQPLRVVRATKPDSGFISDPSSGDITCSIGNSFLPPGPITATVAAGGTVQMLWNTWPIGHYGPVLNYMAKCPGDCSVWKGDTGTPWFKTQQDVYSNGVWASDVLAQSNFTYTVKIPSNITPGNYLLRHENLALHGAANLGGAQFYPVCVQLTVTGGGSLNPSGLGFPGAYSATDPGIHFNPYQGEAANQAYVPPGGPVYPGLAF
PC9H_000120	CDS	scaffold_1	418050	418796	+	RHO1_1	GTP-binding protein Rho1		PF00025;PF00071;PF08477	IPR001806;IPR003578;IPR005225;IPR027417	ENOG410PFAP	S:(S) Function unknown		GO:0005525;GO:0003924;GO:0007264						MTAELRRKLVVVGDGACGKTCMLVVFSKGRFPEVHVPTVFENYVSDIHVDGRHVQLALWDTAGQEEYDRLRPLSYPDADVIMICFAIDYPDSLENVEETWIGEVRHNCPRIPVVLVGCKKDLRNEAEITRSGKRMISYGEGHNVAQRIGAMHFLECSAKTGEGLQEVFQYATRAALVSRMKQKHTKCVIF
PC9H_000121	CDS	scaffold_1	419095	420551	+	RRD2	Serine/threonine-protein phosphatase 2A activator 2		PF03095	IPR004327;IPR037218	ENOG410PFUQ	D:(D) Cell cycle control, cell division, chromosome partitioning;T:(T) Signal transduction mechanisms		GO:0019211						MSTSSSFQVPQKRILTQEQLAAFQSSKAHEDVLSYIQKLNDSVIGSKLSDECSTSPGVVGVLDILQRVEEIAKETPPVENAASRFGNPAFRTFYDKVGEVAGSLHGKIPNLSQEAIPEIAVYFKESWGNRQRIDYGSGMELNFLCWMICLDRQGVFAESDNQALVIRVFWKYIQVMRILQSTYWLEPAGSHGVWGLDDYHFLPFLWGSAQLRGHKYIRPKAIHDPEIVEEYAKEYIYFACIQFINSIKTASLRWHSPMLDDISAVKTWDKVNSGMIKMYLAEVLGKLPVIQHFLFGSILPYDGPAAPISASSQDDEHWGHAHTLGGAGGVGQREVGWGDCCGIPVPSAFAAAQADKEKLPGLRLAGPGIRPVPFD
PC9H_000122	CDS	scaffold_1	420694	422204	-		hypothetical protein		PF04935;PF15459	IPR007019;IPR029188;IPR029190	ENOG410Q109	S:(S) Function unknown								MSVVDAEIRASLERHNNIFESLLKLIPAKHYLVQDQNDEQIASKYQKHSKNQKASKQAIKEATKKAKRDKLDPANQKTIIEIQQGKLDSSRTDKKGKKSKQQQPREEDSDDDDDDDAIHVDVDVDEEEEDRETMDIDSDEKIVPMPHSSGVSELREKLHARMEQLRLGRRGQAANWGGEPGDKDELLEERRQQRAAMRERRRKETKEKIRRQEEMKNKGGKEKKDAKDSKTQGNITKTQLLVPDTSARGAQNGPQSSLTNIAFSSISGPSSASSSKKLAHLKTSSNPAQALEQLTARKEKLASLPEDKRKEIQEREKWQKAEARMDGVKVRDDETRLKKAVKKKEKEKLKSKKSWDERKEQLSNNLAAKQKKRQDNIAMRNERRSDKRKGVGKKGKARP…
PC9H_000123	CDS	scaffold_1	422710	423941	+	STE3_1	a-factor receptor		PF02076	IPR001499	ENOG410PJEA	T:(T) Signal transduction mechanisms		GO:0016021;GO:0004932;GO:0007186		7 (o6-23i35-53o73-89i110-130o163-181i202-226o267-285i)				MAYLHHVLTVCNFLAFLLVLSPLPWHIQSWNTGTCFYMFWCALGCLIHFINAIVYDGTLEVQSAIWCEMSGRLGAATSYGIPAAVLCINRRLFIISRGGSHQTPSRRKMVIADIAIAVLIPAVLTCLISLPQGHRSDLLEDIGCLQPYYNTVPAIMIQGLPPLLIGLASGVYGVLNVRVLYSRQTELKRLLSAGNITIDFSEYYRLFCLGTIDAIFTIPLATWTMYTLMTHTPFRPWIWADVKLNYNSIWLLPRPYWESYSSVQFKVGQWFNVLCALVFFAFFGCSKEARARYRCVVLWAIKPIYKPKPPPQIQFKE
PC9H_000124	CDS	scaffold_1	424770	429565	-		hypothetical protein		PF00005;PF00664	IPR003439;IPR003593;IPR011527;IPR017871;IPR027417;IPR036640;IPR039421	ENOG410PGKJ	Q:(Q) Secondary metabolites biosynthesis, transport and catabolism		GO:0016021;GO:0005524;GO:0016887;GO:0042626;GO:0055085		12 (i55-80o110-134i192-213o219-236i299-319o339-361i983- 1004o1024-1045i1097-1121o1127-1149i1217-1238o1244-1263i)				MRRTTTLEVDTASTTQPTTTVTIEHEDEQAAALPPTPTIQPSLKLLFSLLTRRQLLLFLLPAIIFAIISGGIAPFMTYVVGQAFDAFAKFPISLPTQQDKDNLLNGVGLAALQLLGLALASVALSSITSSFWIWTGEQNAMALRKKVYDEVVAKDMDWFDTKMGGDEQGPVGAGGLMAKFTRETDEVRMASSLASGMVLQYLTTTITCLVLAFIRSYQLTFVILSAVPLLTFIQGVSQATAGPLLSAEHGSIGIAGTLIDRAVSAIATVKAFNAQDFERLSLSKIFGNIHTIAKKLSTVWGITSGLSQFVMMSMFVQGFWFGSKLVREGKISPGDVMAVFWACLIATSNLQMCIPQFITLAKGKFAMVSLLTLIDETPSTPSSPSSPNPPSPLSPASVQ…
PC9H_000125	CDS	scaffold_1	430043	431316	-		hypothetical protein													MNHPYSNPACYMRTNEDDQFFSYARNDNVYDENYSYTAPRQYGKREVRGKDPYANMKSFAPSLSVDSIPLTSPRLSTPLRPANPIPLADPNVGDGGSYSGSGTTDRYVPPHPYGAQGIYTSHLNFDDDEGTIDIPPSHTASYSSAYSTSHSGHHSRPDHQHDSDRKEKRARKERRHSQKDGYLAPTTSFPSSSRERVGYPQNAPDPQSSRGIAVRPGRSASHSGTIRPQHNYSSFQRSTAKKVPGIMKFASEQHLPRQSVHFVAEVELETHQSQTRRVGIEEPVGDEKKGTWRMSLTKRIRRASRQVKSFFGGRLLKSQSMPSFPTSGYYDDPHVGSVRGRNTLVSSWPQASNFQSNAHSRTSQLSLL
PC9H_000126	CDS	scaffold_1	433428	435448	+		hypothetical protein			IPR040976	ENOG410Q32H									MPLGENAKETLADIPTSFFTGFQPKNEWDMYKKMAQFFGNSSAPNFPGIKIVDTSAHPDPASKPGAKVKPDMCVYHEQLRIKSTTPTRLANSLTGVEANDEYVEIFNDSTDPRVATMEDAPFEVDTDKAIVARGQLVTYAVEICARQHRTHLFLVYIYFPYARLIRFDRSGALVSERLNFTKDCTPLNRFFSRFCRMDDIAIGYDPTVHVTSEAEAKFARKHLAAWAPDPKLERSVFKMDVHDDQSGQARQFLVWGSLADPESPLGRATRGYPAMEWRSLALCPEIETLQKINKAGVHFVPTLVCGGDLPSQLTKTQDYASMFDGRIGDKRLDPRQHVRFVVKEVGSPLERFSSSKQMLQAVNHALQGHKEAYELCDGTGLLNDWDMAVVEKDIKDGPR…
PC9H_000127	CDS	scaffold_1	435867	437234	-		hypothetical protein				ENOG410PWWC				SignalP(1-20)					MAFIARVLLAFVLAAVTANAAVDKAQGVAIGHSKDAAQACFGDATPFLLPCCSPGQSWSGNQTTLVGGCCDRGQGWSQDKASGLGGCCAPSLVFVGDKATKTGGCCTAGMIWLNGKCAPPPPRPTCKDLADPVCGDEDDLGIQYGHCYILKFADGTQLGADHAAPTYSKDGFFKDIPFKVCRSTTDCALAEAVPTDGTFLLQDQMGRPEDATGAVGWVDNGAGGTHIKFNTNGAQAGVFKGVPACSGGKCFIRLGGGPTGNGSIGPTCPVPEHGLTFWPNPKATMLISFTETACSGPDAPFVPLNAANPAQGLLSAFGASRSRPAVAISQRPSSSLVASAAIGRVTATAATAARASSAAPARATAPSRVNARA
PC9H_000128	CDS	scaffold_1	438658	440029	-		hypothetical protein													MTMLVFLAGSPDMALDLWSPPQPPKGKAMLDNVVLDPSFHLRLLLRLLNGEFLDLFRYTLEHLHYLSSDVDVDAPGIPGWKSWYGVGPVIPSKAAGDDSDVDAPGIPGWNPHAGVGPVIPSAAPSKVVKRDSDVDVPGIPGWKPIYGVGPAIPSQTSERDEENAGIPGWKPWYGVGPVVPSQTAESDAGIPGWKPVYGVGPIVTASPNSAHD
PC9H_000129	CDS	scaffold_1	441690	442877	-	SPA2_1	component of the polarisome		PF08518	IPR013724;IPR039892	ENOG410PK5B	S:(S) Function unknown								MSRRYASLRSPAYQVEKLSAADLVPTTTKFSEERAILQLRHNELGETLAGCLALFVPGSRIKVRAPLEKLSTQQLLELSGDVYDEVVRRKYNLVHALNLREGFHPKRNQTRQRLALLSSSKFQDLCGDVHFEISRRYPEFQHVPIAIGQSSSRPSPGSHSHSPHHNALDATPSRAGSGGPSEDQVGNSTSNWYDRRLPTYESSLSTPMPPTGSVPTHNARGERDFALSERRVSLHSLSRGGDPMNTTVTRSLPITPTFSSGERPEHKGKRGALVRAFLDGDLDAVLLMWEDHEGRIRHLEDQLARAESVRNYFQLNKAG
PC9H_000130	CDS	scaffold_1	443146	444880	-		hypothetical protein				ENOG410Q4D0									MHRCPELKRLPKSPRFTSVIFRGQNPGSPAKLIDPGKQPCKTPKSTFLSPDHPATSLRKSDFPSFANSALRINAFPFAVLEKPPDPSKEPIARQFKYAHIPWKERIHVSGPRNSGTRIPMSFFIATSIKNTSKKGTIRSTIKHRLRTALNMIVARGAESGTDARGRQKLVLNEAKATEQGNKWLLHDWTYIFSPTLELYRMPYPVMVDTLSKALHSIRVRGLKLETGWQKTPCEEVPRMQVVQTVDQQKTARLVGTTQKRKSQMVPNATVTRAPPRSPAVLGIRKSRASSATALKEPRKATMVPVDQKLWVDRAARELTNVIEKRETGRGSRDDRGLRTELTDDRWSSDNDNGSANSKAARVNSETLFAERADTLPDLSSLFRKLNEHASEEEEQVELD…
PC9H_000131	CDS	scaffold_1	445002	446918	+	GWT1	Glucosaminyl phosphatidylinositol (GlcN-PI) nositol acylation protein	EOG092R0LP1	PF06423	IPR009447	ENOG410PH5V	G:(G) Carbohydrate transport and metabolism		GO:0016021;GO:0016746;GO:0006506		13 (o20-40i52-69o75-90i124-144o156-179i200-217o229-246i253- 275o295-316i358-378o390-413i434-455o461-481i)				MDNYKTSKEAFVSNMTGSSIGHINLVSSAALASIGLYSAFQSRWSPHISNHPLASCLILVLPLLLSMTFFADSPVTLALLLLLPTGFLLLKPRRDSSVVLPNSTPQQDSETTAKIEPFPAVTTYRAHMMLMTILAILAVDFPVFPRKLAKCETFGVSLMDIGVGSFVFSQGIVSAIPILKDPTYLTLPMWKKLPIVIRKTSPIILLGVIRVILVKGVEYPEHETEYGAHWNFFITLALLPILQVLLHPLILRLPVSLIGILVGIAHQFSLSWFGLENYVLHVPRTSIISANKEGIASLIGYLAIQLLGLSTGTIVLPPSPNHFRRQQQALSDRSSKRRDSTASPSITQRQNDKTATVLFSYAVLWWSFLGITKLLAVGTNVSRRMANLQYVLWVAAYNT…
PC9H_000132	CDS	scaffold_1	447081	449624	-		hypothetical protein			IPR000719;IPR011009;IPR040976	ENOG410Q32H			GO:0004672;GO:0005524;GO:0006468						MLTQEAVLVSPPRKRTIEPALVEATPPSKKYSGLIQSQKLNPDDFKKKRAGMCQEMSGYWVGPCEGDDFFELTMPLDLKEGEFEELPNIDRKFFAGKKPANEDEVYNEVADFFMKTPDESHFKGLKMMNSSRHADPDSKAGSKVKPDVGLHKTDDASVTIATPTRLGSALSPGEIKNWFLELFNDLAKKLGVSFESETNDAQDVRGQLATYATEYCARQHRTHLFLVYIYYPHVRFIRFDRCGALVSRKFDLSEDCTPLIRFYSRFSKMTDTQRGYDPTVTLASDDETKLAQDRLKAWKPKHVRPVFKMDVYDDNVEEEVEDNDKVQIKTEVCADDINVGAETLQAADENVKKTPKPRKFLVWGSLADPESPLGRATRGYPALEVTDGLEKAKDAPIMF…
PC9H_000133	CDS	scaffold_1	454329	455300	+		hypothetical protein				ENOG410Q3AB									MFQVAAHPTSFDSHKHGHGHRSSHSSSQHYHQQPAVSSSVQLPRTLARPPFADISREALTAASPELANVPSEYIRRRLRDTAPQMMAGIASLAPSHLPSTLPRSHLPSSLSIPIRSQSSHSTQPSYPTHILAIAPSKPSSSHSADALTIVPTHALVLASQCALLPRFPASSSANPGSPQIQLPVIPVSLPSPAAFQLLHPFLYTHNLGALLASLLPMPQGFVQAPGFGGDHVKHVLGSGQKLHELSVYLCQVSHSLSALTSHAAHIKELWQDCVALGIYDVELWDAMDLAWEVVLGAMNLAARQ
PC9H_000134	CDS	scaffold_1	458125	459148	+		hypothetical protein								SignalP(1-23)					MKNSVVFMLFSAVALSGASQSVAEGSSRDSEPNIEARKAADYAPAVGMAAKILGQALNLPSAQNGPPTMGMGYGMGMGMGMGMGYYKREVEELLGRALSDDKAEALEDLHAREEEYEELETRKAADYAPAAGMAAKILGQALNLPSAQNGPPTMGMGYGMGMGMGMGTGYYRRDVVEELLGRELSDHEAGVMDYLRVRDNEYEELEARKAADYAPAAGMAAKILGQALNLPSAQNGPPTMGMGYGMGMGMGMGMGYYKRDFEELLGRELSDDEASVLEGLQARDDDELEARDGDGADYASRQLEDLFERELLEMFDDSFI
PC9H_000135	CDS	scaffold_1	459830	461093	+		hypothetical protein		PF04678	IPR006769;IPR039055	ENOG410PJM8	S:(S) Function unknown		GO:0051560		2 (i233-252o264-282i)				MNVNHSRFLAEASPGAKWKSKPNETGSSNTGVFDPLNGNGFEKVAEGKGKLSPTSSHLFKLTLPLDRVQNDMEKRGNPKAARRAAPPTVLLLHPSQPLSHVSRLILASLAPSMPSISFQNKSTSGQTIQWSHSTDIGDFIKDAAREAEFSIHFTHEDNRTTTTAQTKNDDTCDTGEGGEGEQAETVIEVEVPTFADRTRFLRRKLEFVKERLREMEVLKKECDYAAHQGARRMALSGFGMLVVYWGLVARLTFWDFGWDVMEPITYLSGLSTVICGYLWFLYQGREVSYSSILSRSISTRREALYKSRGLDIERYVDLIAEEKAIKREISKIAEDYDEVRYERREEEQKVTEAEESDEDEKERRRNKEIEPLFGQGKD
PC9H_000136	CDS	scaffold_1	462678	464890	+		hypothetical protein		PF00135	IPR002018;IPR019819;IPR019826;IPR029058	ENOG410PN4W	T:(T) Signal transduction mechanisms			SignalP(1-23)		S09X			MVQTPLLALPLVSWLAGPQIQLGNTTLYGRNLSDSGLEFYGGIPYAEPPLGDLRLRPPVPKALDVPSFDASDFGLMCYQRDLPAEVMSEDCLTINVLRPAGISSDASLPVMAWVHGGGFDQGSASEYNGTAIVAQSVARGTPVIYVNFNYRLGPLGFPQGREAAEKRALNVGLRDMVLALNWIQDNIGVFGGDKAKVTVFGESAGAIALGTLMLGDTLDGLARAAIFQSGSAASTISVDTLDREADWHHFVTAIPACSMTAWTRDTFSCIRAADTSSLLPAVVAPLALSKQIFPWDNTIDGPGGFLPDLPSRLWERGLFAKIPFISGNNLDEGTLLTHPWVNSTEMLRETLIANYTPALMGERALNESVERLLELYPDVPALGSPFRTGNETFGLSSHF…
PC9H_000137	CDS	scaffold_1	465238	465991	+		hypothetical protein				ENOG410PMK6									MPSSNAPGEQFEVRQTGESADWKPDPSKSIPLPPNRQRLMDDVIALYSCQPTVERVKRYTADCVYDDQFVYANDRYKMAGQWFGLPMLFNKSENVGYQVVKNDPELIQFYNEQTWTFKGIPKTTTINALVSLSLDPATKDSDFVQIKYHKDQANEKDYSHKGIGFYFKKWQADHVSDWMDKTPEVQMFKEDSGDHLHEDVKVYKDGMSKEQVDTK
PC9H_000138	CDS	scaffold_1	466599	467058	+		hypothetical protein													MLPQYDPRIRCRKPWKGSWQNFKPVLEHPCPQSLKTPPSKNSFASRDFSGTYLVLYLTPDGQAKCTHFCLGPQIRITKISTNSVDDGDNGMLRELAIEIEDDDFELDSEINLNAPVLRALLRGEATPAAQSASQPPAAKTCASITVEEAWKF
PC9H_000139	CDS	scaffold_1	468357	469933	+		hypothetical protein													MVLWLNGLVRFTSSAPPEARASRFSCSTVHGDASLDAFHGVFVFEDCYKSRLDVLEIVHNQFLSLQSQYYNHKKPTLSTMSFSSLKFAVLVCVALAMQSTAAPTPSKRGDDAGIPGWKPWYGVVPVIPSTTAESNINAPGIPGWKPIYGVGPVIPSQTPTKVAERDVDVDAPGIPGWKPWYGVGPVIPSKAAGDDSDVDSPGIPGWNPHAGVGPVIPSATPTKVVKRDSDVDAPGIPGWKPIYGVGPAIPSQTSESDINAPGIPGWKPIYGVGPVVPSKHVERDEGNAGIPGWKPWYGVGPVVPSQTAESDAGIPGWKPIYGVGPVIPSETAQSDAPGIPGWKPIYGVGPVVTATPTPTHN
PC9H_000140	CDS	scaffold_1	471304	472672	+		hypothetical protein				ENOG410PWWC				SignalP(1-20)					MAFIARVLLAFVLAAVTANAAVDKAQGVAIGHSKDAAQACFGDATPFLLPGDPDKTVNCCIAPWSVTWFDQNAQIGECCAPGQSWSGNQTTLVGGCCDRGQGWSQDKASGLGGCCAPSLVFVGDKATKTGGCCTAGMIWLNGKCAPPPPRPTCKDLADPVCGDDDDLGIQYGHCYILKFADGTQLGADHAAPTYSKDGFFKDIPFKVCRSTTDCALGEAVPTDGTFLLQDQMGRPEDATGAVGWVDNGAGGTHIKFNTNGAQAGVFKGVPACSGGKCFIRLGGGPTGNGSIGPTCPVPEHGLTFWPNPKATMLISFTETACSGPDAPFVPLNAANPAQGLLSAFGASRSRPAIAVSQRPASSLVASAASGRVTATAATAARASSAAPVRATAPSRVNARA
PC9H_000141	CDS	scaffold_1	472950	473755	+		hypothetical protein		PF14519	IPR028071	ENOG410Q197									MGLQELSFIILDPSTSLTKALTSALDEHVPDSMRDRISVVNKKLSDLEPPQSHFDCIVSPANSYGRLDGGFDLVISRALAPKDDIDAITRIAQSVLYSRWKGYAPPGTCTMVPLQATVCENNPHKCAYIALVPTMRVPEEVTWNREIVYNCVWSLLNALTHHNESAEEGADKISTVLMTGLGTGVGYISPEVFGKQTALAFKHFLDSEAHPDKWSSLQWRDADAYSREVAETYRQPEKKARWFSGFQK
PC9H_000142	CDS	scaffold_1	473964	474944	+	MRPL24	39S ribosomal protein L24, mitochondrial	EOG092R0MZO	PF00830	IPR001383;IPR026569;IPR034704;IPR037147	ENOG410PJC5	J:(J) Translation, ribosomal structure and biogenesis		GO:0005840;GO:0003735;GO:0006412						MIPSAPLLEAVSQPFKRAQLGLFQGKSKQYGNNVPFSKHKTRRTWLPNVQHKYLFSETLEQEVRLKITTRALKTIKRAGGLDNYVLNTRADLLAWEGMRVRLLVQQRLAERQRELASPNAASSSKPAAANAKADTESAIAPDAVEATAASTEGQSVSQSVADALAEIEGVSPDSTLAPTNGEVETAAGADTSAATATKPSSTPSPKIKTDPTSTERLRLQLEAKARRAQQDYDGFMLGQRPTLADARKLRETARVIVGRSDARTAIAFLQTQQKERQHLSKPLTYA
PC9H_000143	CDS	scaffold_1	475312	477265	-		hypothetical protein		PF10358	IPR019448;IPR039931	ENOG410PT7F	S:(S) Function unknown								MSLQLADLGNSSGGPPRYRNSPRRPPPAPLPVYTNGTLSPLPTGGLPSDTPVPHTPTHGLLAQLNHLLPRHTIFHVRLHIHEIASVPLVSGEFAAKWRFKNVQAVPGSKQGFLGIGRKRNTSRSRTSSGQEQDEKTKASSEDGRDSGTTSPEVGSSEDTPSIPSVVVSRHPGGAATQPPTPISHTSPDWHPGPSLLSPSLSSSRIPTLSELSSSLYRQPEEQSTPSLTATTPVNGYASSRGMTTFGQLKEHKVVWDHTVDVVVKMDVERDTLELLPNELKLEVMQRVIPNDPSAPQNPRLGVLYLNLAQYASPSTPSVTRRYLLQKSKTNATLKLTVQLEFVGGERNFVAPPLPKGQILGGVKGVLDSDVLRLRPRIAGLERGMAMAMTGPMGFFPELG…
PC9H_000144	CDS	scaffold_1	477835	479054	-	SPA2_2	component of the polarisome		PF08518	IPR013724;IPR039892	ENOG410PK5B	S:(S) Function unknown								MSSRPATPCEARNSTEDHGSASDGGCVPPDYRKALKVHFDELYPHLVRHLTRSSIDARPRTRQKISQATEEQLWELSTDVYDEFMRRMSLQGAKFLPAQEGYHPKRNAARQKLASLPDERFEVLCGDVFQEISRRYPEFYDCESSDSSSETGLAFSCWLMRQEFPRGLQRARFPNKLRATAPAYGTACQAVEEKPVVAYQDGSELGTTHSVVTNSDHSEETLIASISQSEKPRQTTPSRRQRGKYGLCNLRPAWLQRLWKVLHHQPQTTARAQNEVKEGSQPAADSSRRQKLCLVGRLGLALHSLSCFVKPRLPPE
PC9H_000145	CDS	scaffold_1	480015	480798	+		hypothetical protein	EOG092R0K7J	PF01765	IPR002661;IPR023584;IPR036191	ENOG410PSJD	J:(J) Translation, ribosomal structure and biogenesis		GO:0006412						MRMYASKSKVKSTANMVPGSKQPLTSELALDEYAKAEEKMKSAVDWFKKECAAVETRASGRVTPAILDPVRVVLPDSKAAVRLDHIATVGVREGSTLLITLFEEKNMKHVEQALYASKIPNIVPQKQDDRTIKIPIPRPTVEARTAAYTAATRQAEESRVQLRKQLQASLKRGKFEKRSVEMEEFHKLLDKYIAEIDKNLLQLKKATAAK
PC9H_000146	CDS	scaffold_1	480804	483505	-		hypothetical protein		PF02133	IPR001248;IPR038271	ENOG410Q3C0	F:(F) Nucleotide transport and metabolism;H:(H) Coenzyme transport and metabolism		GO:0016020;GO:0022857;GO:0055085		12 (i35-54o60-87i107-129o167-183i190-212o237-259i279-303o330- 359i371-388o394-418i439-460o480-500i)				MKTVGGILPLLQVSTDSSPYQNPDVLPLPPSRRTWSIKVFIFFWLATAINIAEWSGASTALAIGLTVGQAIAVNAISTIIICMALVINGHGGGKWHISFAVINRTGWGVRGAWFSLCARIILSCCWYGVQAWYGGQMVKIMIGAIWPSFYRMRNTFAPDAAMKTNEFIAFIIFWTISLPIFLLRPEQYRIPAICSSVVVTIAAFALFIWALAKQGNVGPLWSNPEVVYGTGRLKGSVLSWAMMRMISSGIGGWAGGILYQSDFSRYAVKSGDQIWGQVFIIPVCLFGSNILGIITTSCARGFYPDEPLLWKLYDLLEAIQMHEGPGARAAVFFAAFAFFLSQVCVNVVACGVVGGMDLAALLPRYINIRRGSFIIAIIGICINPWKILNTANSFISAIS…
PC9H_000147	CDS	scaffold_1	484100	485795	+		hypothetical protein		PF03171;PF14226	IPR005123;IPR026992;IPR027443	ENOG410PPKA	Q:(Q) Secondary metabolites biosynthesis, transport and catabolism		GO:0016491;GO:0055114						MCSLSPTGAASPDQLDPWVFPPDTNAIPEDQYVDLEVLDISAFNVPDELVPGRASDTLLESHKELITRAFEAFRTIGFVAIKGHGLSHDDIRHQFNIGKLLNYGVSEEEKRTLHAQIWEGSWAGYKPQGYYNRPDGAFDYVEHYDLYPWTALRSRMPNIGQRLLKDIRQFIEHNHFIILRKILAILSLGLGLEIDTLWKIHHRGGVLDKGVLIDAPADHVKWQHTKDHLRYAMYHPPTEEDRIKRKYLWVPGHTDLGSVTFLYSQPIAGLQILTAPDEWRYVRHYPDHIIVDLGDSIEFLTGGILKASPHRVIEPPEDQRHLDRLGIFYFVPFLGDTVLKPIDHPSIHKFGIKDFFEEYYALGGQPITAEGVPPLFSSRYP
PC9H_000148	CDS	scaffold_1	486108	487474	-		hypothetical protein				ENOG410PWWC				SignalP(1-20)					MAFIARVLLAFVLAAVTANAAVDKAQGVAIGHSKDAAQACFGDATPFLLPCCSPGQSWSGNQTTLVGGCCNRGQDWSQDKASGLGGCCAPSLVFVGDKATKTGGCCTAGMIWLNGKCAPPPPRPTCKDLADPVCGDDDDLGIQYGHCYILKFTDGTQLGADHAAPTYSKDGFFKDIPFKVCRSTTDCALGEAVPTDGTFLLQDQMGRPEDATGAVGWVDNGAGGTHIKFNTNGAQAGVFKGVPACSGGKCFIRLGGGPTGNGSIGPTCPVPEHGLTFWPNPKATMLISFTETACSGPDAPFVPLNAANPAQGLLSAFGASRSRPAVAVSQRPASSLVASAASGRVTATAETAARASSAAPVRATAPSRVNARA
PC9H_000149	CDS	scaffold_1	488787	490172	-		hypothetical protein				ENOG410Q3MM				SignalP(1-23)					MSATRTHLPTLLLLPSLGKPAESSIPPERPIIAQTLLDIAPDREALFTSGKNVEEIRQTLKIHMNDAYGHWLTTTKRRQGTRYRDRTARTSRFLDKAPLANGNQIQDENEAPEDDVQIVRRVCSAGDLGSFMNSIDNKLNINVSPEGITFDIWGDLRLSSTEKVISPRPLGPTHILVVHQGPLQRTASRARNSQRESVPDSLELPINDLLFVLNVPNLSPPNRSLSEVPARILPHRLHKELPRVLLCVPHLYTFHELVVYLHTKNQAALFRKIIPEWIRDLMHPLPVAIPVCSSSIAQRSESGSLTPGLSMYQHAPLRKRSTLLSLFDSSSPIAEDANSSAESLLGLPLAMTASFNGSCSSLIDADRLTLSIAKEIADISMTNYANDDVLVRTVSGLDA…
PC9H_000150	CDS	scaffold_1	490906	492743	+		hypothetical protein		PF05426	IPR008397;IPR008929	ENOG410PQMY			GO:0042597;GO:0016829	SignalP(1-29)					MLPTLATSNTFFRVLAIFNLFASLTSVHAATSYANDFVDPDYILAKDYGSSGSPAKLTIAGWARELAAKGPWTVTNKTATPPTGDKRTYMSWAPYWWPDCSQAGNTTALSDEQVWTTCRYISRDGIFNPDARLVVNDVGAFQDLSDAVLYNAISWALSNATSNEYSKNVVNFVNTWFLDETTGMLPNLDYAQQIRGPGDPKGSHTGVLDLKGMSKIVSGILILRKGNCPDWTSELDARMDDWSKRYITWLETADLAIEEALSTNNHGSFYYNQLAALYLLVNNNPAARNVTDTFFRGIYMNQIEANGEQPLEAARTRPYHYRAYNLAAMITNARIGIYAAPDAPSPFQFKTSQGATIQSALDFAITFKASDSKEDNYASELNPNVAAVAAEYGDPDGKY…
PC9H_000151	CDS	scaffold_1	494629	495098	-		hypothetical protein													MSNTMIRPEGFENVVGGDEYDKRITAGINGGRGNNNKRIHMTDDDPEAQLALIKNSVSGDLPEAAAKAAFGQLLELRDTFDALKTRNLQLQSRLCLRKVKKTPTSNDTAGPDTAGTTSR
PC9H_000152	CDS	scaffold_1	495577	496964	-		hypothetical protein													MAPSRSTLNYLIKVCRTKVLHLSFYPNCYLSCSEDTFKLEISSGSKYWVGDKFGEICGGTNGGRGNINQEITMPKANMSAILAKYEGMVGAMPVALRWQVSGELDQMLDKIDKAKELTEGLLQDLTAKYGFDPAQAWRALNLQQQLLLTSL
PC9H_000153	CDS	scaffold_1	499757	502711	+		hypothetical protein				ENOG410Q35B									MPNLQPPAPPRRMTMPSSSPRPPSPLRNGFVYDTSTGIDPDVQSDSGSEDDGSDDSDGYHRPRGGRRGSRSPSPSASVTQLAANLAHRVGSLVSSTMTPRSPSASSAQLQFPNPPSHHPGLSAAEIESEAERERDRTRREAERILTAEAEERKRVEERVLALLHKTNATNTLPPPPARSQTLPPSPTPSQKEGLGGWWQAAKNKLTPTKEPLTPAQQVIQEAKSREKEERKRAKEREKEGGGYSSESKGKEREWPTNPNTKYSDPILLKLNTPQIPRKPPPQAPSPSSPTPSRGMFGSSPQPTSDALLPPLSASPKLMSPSTSPRPHASPSVPSLSSNLASPNLLASPANKTSAANSPTSRQPTPLPIYATFTPSGTLDVPSTVLAIARRFEKLERWTV…
PC9H_000154	CDS	scaffold_1	503031	504913	-	LCB1	serine palmitoyltransferase component	EOG092R07K7	PF00155	IPR004839;IPR015421;IPR015422;IPR015424	ENOG410PGFC	O:(O) Posttranslational modification, protein turnover, chaperones		GO:0003824;GO:0030170;GO:0009058	SignalP(1-26)	1 (n13-22c26/27o50-67i)				MSFVGPSSSFDPLFAFLSFSLLKVEAAFYSLPGSSVIARYVKSSHQNDPGRTVLELILVVFAIRTLLQSRTRNEKQQKHFIEFDEKEIDELVAEWTPEPLTPQLTATEKSDLAAIPIISGANGAKPRVTKMAKPVLNLASYNFTGLAGNEHITSRAVETLRRYGLGSCGPSGFYGTIDVHTKFEETVASFLGTEAAILYAQSMATIESVIPAFCKRGDLIIADKHSSFAIRKGLEISRATVRWYEHNDLASLEEVLMTIEKEEKRRLRRRGCLSRLFGRSRIQVKYIVTEGIFERDGAMVDLPKLIELKQKYKYRLILDENMSFGSVGRTGRGLTELYNVPATKIDMIVGSAAIGLGAGGGFCAGTQAVIDHQRSNGMAFVFSASLPALLAVSATEAIQ…
PC9H_000155	CDS	scaffold_1	505426	508429	+	ATG1	Serine/threonine-protein kinase	EOG092R0LIS	PF00069;PF07714;PF12063	IPR000719;IPR008271;IPR011009;IPR017441;IPR022708	ENOG410PHHV	T:(T) Signal transduction mechanisms		GO:0004672;GO:0005524;GO:0004674;GO:0006468		1 (o659-682i)				MPPTVPQSQRNGRSSSGMTSKSSEEDEAKPYVIVSEIGKGSFATVFKGYHEDTHQQVAVKAVKRDKLSAKLFDNLQSEIEILKSLSHRHITRLLDIVRGERNIFLIIEYCAGGDLTNYIKKRGRVEGLEYVPSPGAAPQYYVHPRTGGLDEIVVRSFLRQLARALKFLRQRNLIHRDIKPQNLLLNPASPEELARGHPIGVPILKIADFGFARSLPNTMMAETLCGSPLYMAPEILRYQKYNAKADLWSVGAVLYEMSVGKAPFRAQNHIELLKKIDQSKGIKFPDEDPRNEGNEDIVTVPIDVKQLIRALLKRDPVERATFDDFFKSLALAKSKFPRPRESAQLDGSNNSAGASMGGSATPEAHRIIPPEVLDPNTIIPPSKFHFRKRESTDGAAAVP…
PC9H_000156	CDS	scaffold_1	508716	509695	-		hypothetical protein	EOG092R0LOV	PF04252	IPR007364	ENOG410PHK1	S:(S) Function unknown		GO:0008168						MEEDEPASSSSKTIPPWVELEYAHMRILAGPKAQVRFTHLSRSSCKSLEEALKPSSSPEDLAAFSCHSEGILECMKNAGLPIDKVCLLDPKAEAELSPDDGDGRFAWFLFGGILGDDPPRDRTSELRSLGFPTRHLGPTQMTTDTALGVTKIVVDDKVPLDKIPYVNYPSIVFNPKESVEMPFKYIADADGNPKLPPGMRELLHEDLNKGFEF
PC9H_000157	CDS	scaffold_1	510105	511032	-		hypothetical protein	EOG092R0OYT	PF04669	IPR008476;IPR021148;IPR023139	ENOG410PN7W	S:(S) Function unknown								MSGKFDPKNAQNLMEIEKQFAVKAVEQAQTYWNLLEKVAPKDLRLTKYDDEIFEHVMKDFPELAEEPYDKLVKIDEELMKSPEGKERWRKFIAEYEKKIKDFNFGSLIRTDATQEYGETNTIFVTRIQFYAYEICRNKLGLNDRAHELAKAEAEKERLEKEKAATKKGKKNGKS
PC9H_000158	CDS	scaffold_1	511298	512623	-		hypothetical protein		PF00249	IPR001005;IPR009057;IPR017930;IPR018247;IPR037830	ENOG410Q37A	K:(K) Transcription		GO:0003677						MDKTCAETHAALQRFIASQKAFLERTQSDIDRLKRLKAEAAVDPDRFCSNISNNLNDSAYKLSKRLEGWTDPPDVDWDTFVGCDPSALKALGSDARSSYANRNQPHTSQRSELSELQKLVKRAKCQILDPVVDKLTSQGCFDRDEDDEIDMEEMKREIERERMMRLKKKKIRCGGLTISISARVPTDVVVRKDLEDESGDVEISIGDDRKACDPASSLQSAVDDIPSISHTSSAPPFVTSSSNIVKATRVRRAPARTQEQDAGLNDTRPLKKAKLKAEPEEPLTIAPTTAANTKRSRDASRPKSETYKQAWSTSEQHLLEKLLEDIPDGEKNRWQKISQAMDGRRTPRQVASRVQKYFEKLKRFGVGLNGS
PC9H_000159	CDS	scaffold_1	512897	514194	+	POL30	proliferating cell nuclear antigen	EOG092R0HUD	PF00705	IPR000730;IPR022648;IPR022649;IPR022659	ENOG410PINW	L:(L) Replication, recombination and repair		GO:0030337;GO:0003677;GO:0006275						MLEAKLQEAGLLKKLLDAIKELVTDANFDCNEEGINLQAMDNSHVALVVVKMESTGFKKYRCDRPMPLGVNLASLTKVLKCAKDDDTCTLKAGDGLDSLNLVYEAKNSDRIAEYDMKLMDIDAEQLGIPDTDYDARITLPAAEFTRIVKDLSLLGESVRIEVNKEGIRFVSDGEAANGSVLLKPTDGKVKIGDDDEEEEEEKEDEEDEDEDSAKAKKKAKKQKKVKKESNDDVEMNGDEENGNEEFTAKSDDEGEDEKEDDEEESEGSSKKRKKASSSKSKKPAKKAKTKKDDDEYSGGVDIAMNQHVTLTFSLKYLVNFSKSSSLSDSVQLMMSNDVPLLVSYSFESGYIRYYLAPKIGDD
PC9H_000160	CDS	scaffold_1	514504	516439	-	CAP64	Cap64p				ENOG410PKVK	S:(S) Function unknown				1 (i49-67o)				MRNTRRQFSPAMLLRRAAHIRPPRSPPLTMGSEEKPRLAQRSLGVTNRIWLIVGLIIVVLTLTHFILPSTSSQTAPVQKILKSKNYLNASQNDPNPFPFCPLYGPGDDIGNKYGALALSQSRMHLGSGARIQRVLQRALSGQPVTISVIGGSISACHGAGDDPISPKCYPTIFFNWWNSIFPHPATELTNGAVRRTNSHYFGYCHSQHIPDVTDLVIIELDTEDTPDRDSMEHFEVLVRSILLRPDQPAVVLLGHFSPQVQVQYGFAGPDHWHDVVAQYYDVPHISTKPALYPSYLASPSSISKFYADAVLASPAGHQVLADVLSAYIQSQVCAAWDIAMGLAFDSSSADGVFDAAVGAEGGVGSPNANGNGGGLFGGLGQRKGVPEPENPNKKAGEEV…
PC9H_000161	CDS	scaffold_1	516757	517541	-		hypothetical protein									4 (i9-30o42-64i76-95o115-138i)				MSLLEARTAFYFLLVLVGLAETVLGAFVVIGASNDFFSTPFYATGAALAAITSIWTVVLVIFGLNPQWKHALSKPGAHVTSTLVFTIVWVVYGIASAISMSSKCRHIQGNYCALAGAFTGLAFLLFTLTSAAMCLFCCTPRTRRGQEDGDSDIPSHELTLRAPKSRTVNV
PC9H_000162	tRNA	scaffold_1	518054	518157	-		tRNA-Ala
PC9H_000163	CDS	scaffold_1	523835	525151	+		hypothetical protein			IPR004827	ENOG410Q45C			GO:0003700;GO:0006355						MDERPKNMAKEYPHLYSGRHSRMDYNVTGHHSTALSERPERSRNAKAQARHRAKRKAYIEQLEQTVTKLQTALGFSPDQVAALPPPLIKIKELEQENARLQRENDEMRRMLSDPTRTSPLELTRRTSITTYQEARACDRDFKRRKTGIDDLYLSPTDPTPHNPDIARPPPLTIPQSMAHSSYSSMPHSGAHSSQNSAPMFSMHASSFQMPDTPSGSSSTSSPPFSPAQMQQTSHSPVQQRPSMPSHQYYGSVKMEEDNYAVRRQSSYYVAPDLTDSHRLPITITMPHLSTLNISINIIPCQIPMAMRQRETTWTHGTRIRRGDQIFIAESHLLSSI
PC9H_000164	CDS	scaffold_1	525825	527404	+		hypothetical protein		PF00923	IPR001585;IPR004730;IPR013785	ENOG410Q3RP	G:(G) Carbohydrate transport and metabolism		GO:0005737;GO:0003824;GO:0004801;GO:0005975;GO:0006098						MSSTKSPSGSNKKANDNSLPLAARDEHMPAVRKLSSEISFCQLQKILRKRNIAITGGTIDLSALMTHNLDGTMVDPRKVMSMLGTKEIYYHLWVATKSVVDNTESIQAMKSKDSLAEEVLAAFLVELGVALLDCVPGPHLTFVNPKNYASTSKMVKDARRIHSGFIKKGTTNERVVISIPGTAEGAAAAKILQERYSIHTNITHITSLIHAIACMEAKPTVVSIPVGRILEWHEARRRKVYSDLLDHPGVEAIEAIGIYVKLHDMKTKLLGTAFRRPQETLYLENLDAVSLTKMQLDRLDAHNISTDSAPPPSWPALDTTRASFRARQAQYPTSFLSAKSGFTSCFSIESKSALSNVLYWELGRATVTMDKLENAVEEELARQLTLKFLDIQTLYGISP…
PC9H_000165	CDS	scaffold_1	528710	530006	+		hypothetical protein		PF00702;PF13242;PF13344	IPR006349;IPR006357;IPR023214;IPR036412	ENOG410PFJB	P:(P) Inorganic ion transport and metabolism		GO:0016791						MSTTLSSDDDYAGLLDRYDVFMFDCDGVLWQGDELIDGAVEVLAMLRRRKKQIVFVTNNATKSRKTYKKKFDHLGVEAHVDEIYGSAFASAVYISSVIKLPKDKKVFVIGMEGMEEELRDEGISYIGGTDPEDCTFEPLSLTEFKPDPAVGAVICGLDTHMTYRKLSKAFQYLTRNPGCHFLASNEDSTYPVAGGRLLGAGAISAPLRFALGKDPISIGKPATTMLDCIKAKIDFDPKRTIMIGDRLNTDILFGQNGGLATLLVLTGITSEADISGPNASPIVPDFVTRSIGDLRVLETLN
PC9H_000166	CDS	scaffold_1	530267	530728	-	RPL34	60S ribosomal protein L34	EOG092R0RFG	PF01199	IPR008195;IPR018065;IPR038562	ENOG410PPQN	J:(J) Translation, ribosomal structure and biogenesis		GO:0005840;GO:0003735;GO:0006412						MAQRVTLRKRTPYNTTSNRRRVVKTPGGKLVYHHLKKPASGPKCGDCGVGLPGIPALRPRQYATISKRQKTICRAYGGSRCGSCVKSRILRAFLVEEAKIVKKVIKSQQKTVRK
PC9H_000167	CDS	scaffold_1	532135	533354	+		hypothetical protein		PF06699	IPR009580	ENOG410PSP5	G:(G) Carbohydrate transport and metabolism		GO:0005789;GO:0006506		6 (i34-55o94-111i150-172o178-198i232-252o264-290i)				MAPKHKGGTRPARPPPDQFALDSKLSVSPMKFPFAGYTSIVGVHSTLLLFVALFLPRTTILLDPSLAPKPVASQLTSRDKPQHPFLAPLTLNPTWTMACVCAGAVVLQAWWGGWIRRWWIELVVLNGTDDQVEKRDKVIQKKLKDIRDGWIATLLASVAFHIILVLFGAPITSHVLQTYLLGLLLSIMVVFPPAYTLGIPFSKGDTESFVIRMTWVRLFAEFSSRNSVERAMVYPALGAVAGSWVGVIPIALDWDRPWQAWPLTPAFGIVSGYVIGSIAALTVSGTINLADEHVRAVKSKTQ
PC9H_000168	CDS	scaffold_1	533870	535414	-		hypothetical protein				ENOG410PS31					4 (i31-48o60-80i92-114o171-192i)				MDYSRPAPPQGPPPTYAFVTRYYKRTLRPRIPRCTMVALLIGFFRAINIEKAEHPQLSTFSIALGALYMAVCVIEIIGVVGSAMQKLALVRIYALASVLAFVIVLAAGIMRIVIHFQFKDVLIKECSDSTNGRTIVFRYGLFGPITSDTINPEEADRWCRRAWDRDSWGEIVSLLIILFLAGMFASIAFAYYRQVLDPSSPANASRAPSSQVRAAGYPTYYNPPYNASAVPNLGYSQPPQQYPPPPGPPPQHRDETFVPPYDGKPPGYGAGDSGDFIGGKDDKENPFADFDERDVTSRPGPGGRDAF
PC9H_000169	CDS	scaffold_1	536168	537953	+		hypothetical protein				ENOG410Q494					4 (i51-71o111-137i149-171o222-244i)				MSTHRMVRPPPLHLRFDNRYSHPALRRTEPRCPTLTCTPTFSRIYTFSWRAPVILVSSLNVLRYLNSYVFIPNPQASMHAVDRISFILHLLVPAFNDFHVDKHLGFSELAILSYVTTIIYITLCTVELFGSVVNLLPRRLHLIETYTRLVDISAILVAVAGLTYSGTYLVYKDELISECVHSSIHDEGLLRSTFRLNPWPTSNDSGAVDCTSAYSADTLTHLLALPISFLLPMILQLIVAHTYYRQSTDPLHKSNLCHQYQHPNSHTATHPPRLPSSSSSNATQVGWLHFPSQSPFARLRAMLPWHRRTFFGYQRLSTEPHTQRQHDHISLHKLQSVPSLHPIKEAPEVPSPVSPEAGLTPGPPSFGGGHGYNLHNGHLSAFTIGSLDTGMEDDAF
PC9H_000170	CDS	scaffold_1	538540	539175	-		hypothetical protein		PF05730	IPR008427					SignalP(1-19)					MFTQVLSVALFAFSLVARAQDLPSCALTCLSSTSGSSCSQTDIPCLCRDNAFISSTAQCILTACPADQIAAATQAAQGLCGAAGVSVSIPSVAPSSSGSSSVSGSATPTAPTASVSVTGTPSTTSSGAAPAQTSNGAVSQSANAVAGMVAFGLAALAL
PC9H_000171	CDS	scaffold_1	540117	540724	-		hypothetical protein		PF05730	IPR008427	ENOG410Q0UD	S:(S) Function unknown			SignalP(1-17)					MRYTIAAVALFAASAVAQSIPSCAMGCVASPSTLGGCDQNDMKCLCGSKEFIAATTTCLNTACPADELEAARGVAISLCQAAGITLDLPESAAASSGASTAAAASATVPTSSSAAAAAATSNAAASVGANAFAGIAALGLAALAL
PC9H_000172	CDS	scaffold_1	541422	542014	+	RPL31	60S ribosomal protein L31	EOG092R0QZV	PF01198	IPR000054;IPR020052;IPR023621	ENOG410PP8V	J:(J) Translation, ribosomal structure and biogenesis		GO:0005840;GO:0003735;GO:0006412						MAPAQKKKTGGKTRSALQDVVTREYTIHLHKRVHGRSFKKRAPWAVKSVVEFAQKAMGTKDVRVDPKLNQELWSRGIKSVPHRMRVKLERKRNDEENAKEKLFTYASFVPVESFKGLQTTVVDAE
PC9H_000173	CDS	scaffold_1	542310	543823	+		hypothetical protein			IPR036514	ENOG410PXW7							CE16		MTAVLTDGVQLETLLATVFHARLGASSHLNVLRQSGGNDGVHLAIGPRCGSLGGSFADVSAGVVLSNYRTIVAFGDSYTDGGKHDGSPLDPPVLVPPDVLAGGRSTNGLVWVEHLANDVSATIKDYAIAGACTDLSLWPSNPRKVDFLMEMDTFLGQNNNLDPDTTLYAIFFGINDFGDYNSDGNHMPQAAQVVLDQIRILSSPPTNGRSFLVADVYGLQVHSTDGELWKQQIFDGLSQFHANNGLNVAFIDFSRIWDAVLNPQVPPGFRAFGFTSTDPCCAVSQCTVSGECADPDHAFYWLVNHPSKETHRIMADYVEEVLDNCAV
PC9H_000174	CDS	scaffold_1	543898	547843	-	TOF1	Topoisomerase 1-associated factor 1	EOG092R02BW	PF04821	IPR006906	ENOG410PGK4	L:(L) Replication, recombination and repair								MADPEVIEIFDDEDADDDTQYDRRALFEPVVRRVVDALGGREDGRYRLGDEVTSCLKDLKKLWRKDDTDDERTIARILWDTRVLPNDLVPILLETAGKGLVEDKRAIYCADLVTAMTWPIDMAEELKELDDELDRGTDYTQLLLSHLHYKAALLRPGVLQAMLGILLPPLAKPPKERKERDGQIVSVVLHLIRNLAFVKDLPSNSHLSSDQAEFSKLQTKLVLMLQDTNILALLVTIAANSTNDPMFTDLNALVLEIFYLLLRGVKPSALTLDQAKQPKENLHRLLAAEAQNRKAVARMASSRHSRFGTTIAVKLNPNKKRQVDGEAAAPPAEPSTRSIVLHRQQALTHDSGSIMDMVKKQKFRKGKTVDALTREDNLSVEAKNILKSLAKDFVEGCFN…
PC9H_000175	CDS	scaffold_1	548834	550107	-		hypothetical protein				ENOG410Q4F1									MAKRHKRPRSGLSGGDTFALYQNVLHVQEILKRMIPIPEDEAANPDDDDSQDLTPVDDMVETIRKLLEPKLNSRPVLSLSSLRQEEIEKLHLTEGPHLILVANPGRLDEERVIGENQLWSHETFYRHLCLLQSSVTQTEASARTFIDAFFYRAAAILSSRSSEGKRVVLGLEVPVNATVGKEEATLKGFVDYAILFAGDTRATSFIREPLLSKIRLHSDFVLFITEAKAVDVSLYHQLPQALGEMYACSAAVNKKIIRGALTNGRAWLFLILKVLPDGRGGEYSVSKEISIMTPGVDFTLEVNSNSCAQISVIIASWIENSFKDLDSSDWYRANV
PC9H_000176	CDS	scaffold_1	550974	552640	-	CAP59	capsular associated protein		PF11735	IPR021047	ENOG410PJH9	S:(S) Function unknown				1 (i21-41o)		GT69		MERSRSAAGEIPTTILQQLRRIPTPLALLIGIIFGFIVSRFQPTFFSTSPIAYTKSRQQTRQPIALPTLEQRLRVLDLVTSLSPHYTKECTRNSQPMYWQQTYERYAPLIGHKSPKNPSWFSSVFTTSSAQQPLYARNKASDQDLTEHKYFFAINLYNSFDVIPDLFATLFRVAAILGYHNVFISIYENGSTDQTKALLRIFDALTRSLGMRITIRTSQRTRGAFNHRIEYLAEVRNAAFVPLHELRDSEGEYFDSIIFMNDILPCVDDLLELVWQSRNNNAGITCAADYMYHDEIQAPVFYDNWVARDINGTALENAPFESIFHHADSSMRFQRHLPVQVQSCWNGIAVLDPAPFYEPPHVRFRMARITNGECSASECSLICNDYWEAGYGRIMMVPR…
PC9H_000177	CDS	scaffold_1	555065	557801	+		hypothetical protein		PF13347	IPR020846;IPR036259	ENOG410PKCY	G:(G) Carbohydrate transport and metabolism				12 (i34-53o73-94i106-125o145-165i185-205o217-239i281-303o341- 361i394-415o421-445i571-591o639-659i)				MTGFASLPIADEGAGHDDPMREFGGVSKIIGPRWAHLPTITVGLLGVQIFWSVEMSYASPYLLSLGLSKSNMAVVFLAGPLSGLIMQPIIGVLADNSTSRFGRRRPYMIGGSIVCACAMLLLGYTRAFASIFTGKDSDATDILTIWLAVLAIYLIDFSINAVQAVDRALLVDTLPSIEQPAGNAWAARMLGVGSVVGFFVGNIDLPSILPFLGSGQLQVLSAVGSFLLLATHSVTAMFVKERRLLSISRVSSRQAKENRIVREIKDIFSNMLSLPRVIRQILTFIESAWIGWFPILFYTTIYVGDLYKRAHSSSLPPSSSPDFPQAQADLDATATRLGSRALFYSSLLSLAANILLPFFVAEASDGSDEFNSRHVSGIRAKLLKLGALLTRKKVHLASL…
PC9H_000178	CDS	scaffold_1	558030	559797	-		hypothetical protein		PF01399;PF10602	IPR000717;IPR019585;IPR033008;IPR036390	ENOG410PGAD	O:(O) Posttranslational modification, protein turnover, chaperones;T:(T) Signal transduction mechanisms		GO:0008180;GO:0000338						MDVDAPEDLPQTSTAPKSGKRHTIVPVDDAHPFDLESYIANYTGRTVIDRLTHIIVSCPSIAPEAFNLAIQHIHQSRDPSQYQIVLDAYEHAAAASTSPLPNPNDIASLDGQWAEETLSKNQAERTKLEVELKTYSNNMIKESIRMGYRDLGDFYRSVGDYGSALKQYTKSREYCTTSQHVLDMCLSVLELLILQRNYSHISTYVFKADAALDAATASGSGSGSTGSSNKKGSPEREKVQSKLDFATALSHLGQSNYEKAAYYFLRLGPSKQLGDWAGKLVGPGDIAIYGTLCALSKLSRSAIKAQVVDNNTFAGYLEQEPYVRELIGSYMNSNFKTCLEILSRYSTRHFIDIHLSSHVTGLTNLIRDWAVVLYFQPFATIKLERMSAAFGWTVEEVER…
PC9H_000179	CDS	scaffold_1	560020	561391	-		hypothetical protein									7 (o12-34i46-71o91-110i122-143o172-198i210-233o253-276i)				MGAITATESLIVSLFFVSFLEGVFVMLMATGVYLAQAQHQRKDRKWTGLGVCGVTFFLSTVHFIMVFYQYYGLLGGSERYSPSDLQGYARFNLASYPVAYLNVMVACLILTWKAWTLYDQSWAIVAGGVTGTVALAVASYGFVAVSYQEVPNLVGSAIDDFYSVARTEPIRAWALSSIVLTVVTSVALTGLIMAKLIAQQRAMREYSSAVFDLLLFFESGALFASGWIIYLVLFLVDNQATILTFDSMSQLSGIVPSLIIILTSAGATIVTPRVYTDRRPTIASSRVETSMQFGGPADTGFSVSMGGDSTELETKISSKKSKERLYVN
PC9H_000180	CDS	scaffold_1	562437	564130	-		hypothetical protein		PF07767	IPR011687	ENOG410PKBP	S:(S) Function unknown								MAATSLPLRSNVPESSKQKNKKNPTSTIGAPAQRSQSSRKGKRAWRKNIDIDQVEERLEELRTEEREFGKPLQKHDDSELFQIDVTGDADIRKRLPRYSKAQLTSTKILSQRSAVPAVVSRTTTSSKKRKSPLSQEDKARLLRMGKRMRRGPFNSVMDPTEFGNGSGLLELSEAVKKSGTYDAWATENEEEDIVMEGGFGTETVNKPKVKPPPVPHPKDKIEVPAIAEPHQGTSYNPLASAYQDLLLKAHETEERRVNEIAKVAAVKDKMAEARHNDDDADNIGLPRGMKLDTPLEDDTEAEGEVLLPKKQPERKTKAQRNKAAKALAERRILAAKAARKQLLVAIDGAKTLRKSTEQSFAARQQERLLKRQILLDNLKYGLAGTRLGKHKVPEGNLDV…
PC9H_000181	CDS	scaffold_1	565216	566546	+		hypothetical protein				ENOG410Q3B1	S:(S) Function unknown				7 (o6-21i33-55o75-99i111-130o165-184i205-226o238-257i)				MSFLQGIFTVLLGAAVYFVVIRRSGKREKGINWLGLSVVVIMYMISTTHYVMVVYQDLTEFGGKVDPATRDVKAFARFGLAQIAIEFLNCIMADTLLVWRAWVIYNRDWRVTVLPIALVSGVIMTFYGYIGSSYAGLNDLKGNDLQEVFSQAQKHPIRTWQVTGISFSTTTNVFLTSMMAIKLIMHHRTMKRVHGFSTLIFESLVIIESGALYTFAWIAYLVLFALGHNAVSIALDTISQMAGIVPALIIVTISAGLSPVSPPSGKRSTFAAARGAGTSATDIAFTTHVSLNVARETHQDSIIGDPNHKDPEAVSPSS
PC9H_000182	CDS	scaffold_1	566872	568339	+		hypothetical protein		PF00248	IPR020471;IPR023210;IPR036812	ENOG410PG0V	C:(C) Energy production and conversion		GO:0016491;GO:0055114						MTLPTRKVGDVNVSALGFGAMGISAFYGPTEPDEERFKVLDAAYEAGCRFWDTADVYMDSEELLGKWFKRTGKRDEIFLATKFGLRSSPTRLINGDPEYVKASIEKSLKRLGVDYVDLYYFHRADPTVPIEASIWLWFRTVGAMSELVKEGKVKYIGLSECSAKTLRRAHAVHPITALQVEYSPFTLDIESEKVGLLATARELGVKIVAYSPLGRGLLTGVYKSPDDLDPNDYRRRVARYSKENFPNILKIADGLKAVGERHGGASAGQVALAWLLAQGDDIIPIPGTKRIKYLHDNLGAATLKLSSEDVAEVRAMATAADAAQGERYPPDMAAILFADTPEL
PC9H_000183	CDS	scaffold_1	570813	572810	-		hypothetical protein		PF07690	IPR011701;IPR020846;IPR036259	ENOG410IMT0	U:(U) Intracellular trafficking, secretion, and vesicular transport		GO:0016021;GO:0055085		12 (i48-69o89-108i115-136o142-165i177-198o210-229i250- 277o289-309i321-339o345-365i377-395o415-437i)				MADNSYNASPTLACVSMPDIGRPEKLDVENKAGESPPPSGPPDGGRDAWLTIIGGFLVQFCAFGYMNSFGVYQDYYTRDFLSNKTPSDISWIGSFQLFIMYALGVVVGHAFDSGYFHHTMIFGSVFYVFSMFMVSLAKPHHYYQVFLSQGVGMGIGQGILFLPSLTIVGHHFKRRRALASGIVVSGASVGGVVFPIMLSKIAQRTTFANSIRATAALVAVLLFIANLLMKTRLPDRTVGRPAPRPEVKGILSDWTFVIAVLGAFLTNLGLFFPYFYLQLYAVAQGIDPSVAFYALTILNSGSMIGRLLPNFLADSLGVYNMLIPFIVISAGLIFSLLGIHSFPSIIAFGALYGFSSGAYVSLVAPLLGQLSSHVGELGIRMGIAFSIVSIAMLIGTPVE…
PC9H_000184	CDS	scaffold_1	574150	575632	-		hypothetical protein		PF00582	IPR006016;IPR014729	ENOG410PHAI	T:(T) Signal transduction mechanisms								MSDYGHTHQPLPPAPLRSALKNRDSAHPTPTATPDLRSSRPTTPSGTISPASDSPYITRLPLPGSQSSPTALDGPVALPPLSSTRLRNSLPAATGSGGLFSQSRQQVSSPPPGPAVPPSPLPSLLGLPPSSSLPNPLSPTASIAAQGYTPKVSFDTFENPVASMFSFTLQVKADGYKRTRSTRVFLCASSPDESGREALDWALESLVQDGDELIVCRGVDEDVLEKDHDIIREEAREFMRHIQEKAVETEPDRKLSLILEYVPGKITDTLDRLIALYRPDSVVVGTRGRSVWQNMSIPGMSGMGSIGVGSVSKYCLTHSPVPIIVVRPERKVRKAVEKRRADPKRGRHFDGDHTKPPPLSRPTTRSAPVSMSPPTMSSPVDGGD
PC9H_000185	CDS	scaffold_1	575757	576570	+		hypothetical protein		PF00397	IPR001202;IPR036020	ENOG410Q0FY	S:(S) Function unknown		GO:0005515						MADNPDVTQKTEEIATKAPTPEPVPSTEKESNAAESSKSTSTSPSPEEGAEPTSTSGSSPTPSQPAWQAIYSPQHNAYYFYNAETQETTWTNPLEPAASTSQEPSDVPSTTPSASTSSYKAREAAALAAGIDPSLAHLDPSLAYAGIPGASTAPNGQPLFTAKFNARTGAFTANNARDPTHLSEYERAKRMSEFYFDVNQWEQDLATRQEEDKDEAGKKRKRPTKKDLVCPFFQTQARADSQSITGTVQGAETVEEDSKDCVVASVNLFH
PC9H_000186	CDS	scaffold_1	577246	578642	+	DNAJC2	DnaJ (Hsp40), sub C, member 2	EOG092R0FRL	PF00226	IPR001623;IPR036869	ENOG41KOG2368	C:(C) Energy production and conversion;E:(E) Amino acid transport and metabolism;O:(O) Posttranslational modification, protein turnover, chaperones								MASVLTLPVTVPPLLPSYSAPSTSTSILSQPKPRTLLPAGPAHLKHLRLLHHHDSSFDRHDEHHSALQEKEDEERRRLAQLGATDDLGVGDEDESNELLSLDPKEWKKHDYYAVLGLSKLRFKANQDQIKIAHRKKVLKHHPDKKAAPTDNSTTSLLYGTVNTNDDAFFKCISKAYEVLSHAEKRRQFDSVDPEFQDRWDDAPTAAELKAKMSKAKDPNEAFFKEMAPFFELYSRFSRTQPVPQLGSPDASKEEVEGFYDFWYNIDSWRSFEWLDKEINEGSDNRDDKRYTEKKNKTERARRKKEDTAKVRGLVDLALSVDPRIKRIKQEEKAAREAKKAASRSGTPGVNGKVNGKPSKEEEERKKKEEEEKKAAEEVAKAEAKKAKAAAANAAKKARR…
PC9H_000187	CDS	scaffold_1	579225	581861	+		hypothetical protein				ENOG410PZ51				SignalP(1-25)					MVSRPSQRILPVVILALSLVSATSAFNDWSVPCFHGECAYDTSSSSVGSGTVQLFGSPKGMTDITPAAGWVILDCDPNALDQTIRLVCMNEDEEACGHLFAHGGPQDKVVRLPESCGAGPFARIAHLSTAEDQSIPAHVSPKIVRRDGATPQVISLGVDANWLSIDTENRGEIQFRIAGINGELPAGHFHDGGLHSREDSKTWFQSALVKVAKAAVVLAEHLKDKPFFASDANGVEASKTFDKTIPIFEKNATCGPLKGTLKVEVGAKGSIKGNIGFVAAGKLGKEPETDDMATLYRLTLDADASFTVLAKVAGNEKRSIHLLDLPLGPFSIPGIANFGPKIVLDALGEAELQLTSDSVIGGNFNIDRNQHVKDVLKQDAITQPRDSKFSLKAATNIAG…
PC9H_000188	CDS	scaffold_1	585141	588486	+		hypothetical protein		PF00487	IPR005804	ENOG4112P1U	I:(I) Lipid transport and metabolism		GO:0006629		4 (o46-65i72-94o100-122i272-291o)				MLWYQIFQDGPEYEARKRKSSFEPPNIALKDVRDAVPPELFERNTLISLFYVIRHVMIVLLFYHLATKIDAVAAFAAASLHGYGGLVTSFTSVWLRTVLWLLYAAWQGIALAGLWCLGDYLLRHIPKRMHTDTSSTNSGHEAGHGNLSPHALVNSALGLLTHSFVLVPYYAWRSTHRTHHKATNHLDREETHYPATRRTFNLPHGRVAVKMDYQEILEETPAFTLFKMFMRQFFGYQLYLIHNRKGNPKYPKGTSHYKPSSMLFTPEQRTSIIISNIGMCAMLALLAAYAYHHGRSSLWCYYVLPWLPYVTPSIPALPALHRPLHPVSDPDVNADDVSSNRIVTFTYLQHSDPTIPYYRKDQWTFARGALSTVDRPVFGWVGRALLYNIGHDHVAHHLF…
PC9H_000189	CDS	scaffold_1	590379	594237	+		hypothetical protein		PF03061	IPR006683;IPR029069;IPR039355	ENOG410Q3W0	S:(S) Function unknown		GO:0003700;GO:0008270						MRRTAGITASAATSISSYSHPSHSPSPSPSSSPSPPHTPPNPNPNPALANTSSPPLSTSPHPSSSSASSHSSPSLAAPTTPTTSVIRSRSSTPARDSVSAHPPIPIPPSVASSDPSFATSAAYGTHTPASKTKTKPKAGYRPTNAASASALAMPTTTPSLTASTPKTPTPPPPTPTTTPHSSHQPHQPHPPKTPHQPHQPTEKKPWIDPAALPSHGSVAHIAGNAPEHIKRLTQNTFFAYGVGAPPPPPAAARASSRSRDSSRSRDSGRASGRASVRSLGEGDRHGNDGADEGDAEADEEADGGGDGGVGAWSGDDFFGYAVGRRVRLVDISVYPSHSPPTNSATSTFTEDVSGAERRNGVERSGDVERSVESSVGVERGMGVSGEGGMGMERLEASTT…
PC9H_000190	CDS	scaffold_1	598025	599565	-		hypothetical protein		PF07690	IPR011701;IPR020846;IPR036259	ENOG410PGZ4	G:(G) Carbohydrate transport and metabolism		GO:0016021;GO:0055085		7 (o15-32i44-65o71-93i105-125o179-198i271-291o297-316i)				MHWPRTSPDDGRRPVYLAGLPFSCLGSYQIAVSQSIYHLIFWRFVQNVGMSGGMSLGAGVIGDIYKLEERGFAMGVFYGASLLGPAIAPLTGGKCIATHYSSWRMLQWGFLIYGLALLVLMVLWLPETSHPGTLGIEKVFDDQNQQVPRCTPSRRHWRWISVRRFSAFLRNATRPLTRSPIAVLLVPLAFTIGAKYGITNEALIGAVFIPCGIGNVGDTDSHQTTVGAPLAGLLSDRIVRTSRSKCSKRSESGRAGAEGGWYPEDRLRTTLIGAAACVPLSVLLAGLAIAYVPGRTGLIVCLGCLFLNGIGVRVSLSLSPRLHMPMPMCAWYGSDD
PC9H_000191	CDS	scaffold_1	604962	609998	-		hypothetical protein				ENOG410Q48C									MDPLFNPNNSQPDYGAHDMSMMVDDAEIAPGASQPIADSNFFCSSPAALHQSDDEYATPPHHKIPLEDVDTMMSIYDQTAATDPSRLFDGDDTNSTPNDPPAGSSDTSDEDYKPSDLGAGDEAGDEENDEEQDEEPPAGSSDAGDDDAGDEEQGDNEELQEDDHEPSDFGDRDGEGEDEEDADAVSDTDTEDPAALPQHGGGKRDVLDPNDILKDGAKRTIKLTPRATRTTQASAAQRDPIGKIPALRLDPDGEEMMSPPPSPSPQRPRASALSSAPLDHGEIHWSPSPRASPPALAPLDHGEIHWSDGPEGPVISLRIVNTAEDDPEHDVYKIPITDIREQPKSGLLAVSRYLLDHVAGQKNDPADYGIILPKRPIALRTADEIDDDREEEEEYDVNQ…
PC9H_000192	CDS	scaffold_1	610898	611571	+		hypothetical protein													MGRASKFHTIEERHSGRKAASKAYSAANRSQLCERKRALYRKSRSRKGTPYINKDTAIQSLPTALLALASEPLPTSPLFLEASESADNLDESEITQFDGDPPYVAQPPSTEPDGDYLEKMLDVMSGRRARHERQRDAEMECKSHECIERELIDELGEWEALATILETYEASASHNAMARNRLWWRARIVNNLFVAASKIRARGSGE
PC9H_000193	CDS	scaffold_1	611648	612423	-		hypothetical protein		PF02902	IPR003653;IPR038765	ENOG410PXAI			GO:0008234;GO:0006508						MVGRYSMYPDSIRLLFSPESWLDDVCINACASLLQDSLSAPQLPSSDASRACAIFSTHDLVRVRHNTADEYFWGQVRATEYWNKATWIIPIHRPSPENHWVLCIALPHSHTLYLFDSFGHRGSWDQDVEDVMKLVTRLVLMANRQYKSCRVITEGWTAKPTCVQAMQTNGYDCGVWVLAGIAAALQGFHVPALTELEVRELRHHLYRAVMAQPVYVPRSQRCNQ
PC9H_000194	CDS	scaffold_1	612522	616279	-		hypothetical protein			IPR040521;IPR041320	ENOG410PXAI									MPKSQRKSQIVVPGLGQHYTSPKKAAPRRPTVLRPLGHDLKKRRLTDELNRLLANPGATITAVPDTAVPDVPSGEHDDRAHNASDALDNLAAQMITNMDMDPPTPRGTAPPPPKASGEASSKLYSSWASLLPTLVEPLLEYERQSIGKPLTSPSSILRGCTNGRNIDCEFRTLNMLCLFPDHFRMLEVQGCKCQTIPQRLVTHGLFPTSPAQPRIAISIDLLNLFHSLFEESCDAVHAMSHALKKYYLRRGYMLTSNQTGDEVKEPFRRSLGYAMQWHDTLRLLSAISTTVEPHNTSSPPDISSELPNEVLANHGIDQAPSLPARELQIRCPACFGGDKFGVPFSEGGDFHVAVDGNFHHRHRRSAGDSARFHKPEYFLSKEQVDRVGVHIHKARKGKP…
PC9H_000195	CDS	scaffold_1	622431	625980	-		hypothetical protein		PF05199	IPR000172;IPR007867;IPR036188	ENOG410PJHS	E:(E) Amino acid transport and metabolism		GO:0016614;GO:0050660;GO:0055114				AA3		MPQPYIHSFAHIPTVRSTFPPGTSSDSHTRQSGGGHGHGHGDVDGGVDVVGHGGNDGDDGHGALPQEFDFIVVGGGPSGCALATRLYARTQGRASVLLVEAGMHPAESPELNNCVPRILQTRALHRSAFDYAYPTHHEHEREHEDDHEREHGHEHGHEHERHHEHGNTEDTEDNKDGEGGAAQGTEHGANPNPKPKPKQLVLNSGKVLGGSTCINFGIWTKGAKADYDLWAALVGCDEFSWAGMGACFDRAVSPSLPNPTPPHPTPTNPPTPTPTHPAPAPTPTPPIKTRRISQSPRLHRWSGVARRALEERGFRVLDSAVDRVYGVDDGVNGGLGVNGVNGGLGELGGSDTGARVGGGVGGEGGGREGVADVFGELTECVDAAQARSTALGYFEAIVD…
PC9H_000196	CDS	scaffold_1	627504	628055	+		hypothetical protein													MTIPIEIRKDGEELDAETSSARVNARLDETTAEMREAWRTAAMRRSSRPRHAITEKHIFVAVPPMHGLSEFAHPGNCCNITSDSYGAGASPTSPTSPTRNAAGTIVGYSISAQPLYQHHQQQR
PC9H_000197	CDS	scaffold_1	629453	631228	+	NDH51	NADH dehydrogenase [ubiquinone] flavoprotein 1, mitochondrial	EOG092R08FD	PF01512;PF10531;PF10589	IPR001949;IPR011537;IPR011538;IPR019554;IPR019575;IPR037207;IPR037225	ENOG410PK2H	C:(C) Energy production and conversion		GO:0051539;GO:0010181;GO:0051287;GO:0016651;GO:0008137;GO:0055114						MLSVASSLKSIPRPARAKLGRLSARSFATVTDPPVRRYGGLKDQDRIFTNVFCKHDHGLKGAQSRGDWHKTKDILLKGDSWIIQTMKDSGLRGRGGAGFPSGLKWSFMNKPGWEKDPRPRYLVVNADEGEPGTCKDREIMRGDPHKLIEGCLVAGRGMNATAAYIYIRGEFYQEASHVQQAINEAYAAGLLGKDACGSGYAFDVYLHRGAGAYICGEETALIESLEGKQGKPRLKPPFPADVGLFGCPTTVANVETVAVAPTICRRGGSWFASFGRERNQGTKLFCISGHVNNPCVVEEEMSIPLKELVEKHCGGIRGGWDNLLGIIPGGCSVPVLPIDKCAEVLMDYDSLKDAQSGLGTGAVIVMDKSTDIIKAIARFSAFYKHESCGQCTPCREGTT…
PC9H_000198	CDS	scaffold_1	631783	633268	+		hypothetical protein			IPR038753	ENOG410Q0JE			GO:0007249						MMFAFFRSPGKAPTPARGSHTPVARSARPPPGPSSAQFARNIRHCDEKLARAAGPSHPYTRTLRRQGSLKAQPSLRKGASRPTDRNGRRGALMPGGIHSVASFPAIGGVAPVAKPSTTPATLATPAWMPGGLQPVALPSFMEANATFVLPGAADPVFGRPSGQMEPAMNEDEDEIFRRQMASMMRAHHATKGLMEQREEVERALAERKKEAKMARKMKARQERERLARAELARREAERLELERLAREEAQRAEIERLHRERMAREAAEREARRQEQERQRLAREAEAKARAEQERLAKEAEAKARAEQERLAKEAEAKARAEQERLVKEAEAKARAEQEKLAREAEEKARAEQERLAMLAAMQAERERAEKEAAELLQARFSLYEAKWKVLRDGVSSGF…
PC9H_000199	CDS	scaffold_1	633946	634676	-		hypothetical protein									3 (n4-12c17/18o27-47i68-86o92-110i)				MTYTTVATLILLSYDGACIVSSVPWHVVWFGATAIITQAIISIAGLSPTAIRDLRRQSTLFAIITRDSFFTFLLVTTLSAIIITHASLLAPIIPSLFITTLSISGCRMIINMLETEARSGRTLQTGSVHLTSLLNALGSTSSGGSVEQDPSQVVQNSSPHNPSTA
PC9H_000200	CDS	scaffold_1	636042	638973	-		hypothetical protein													MTVSPAGTKAGSDRGGVVNQVPSGKSLELPDVNANNMPPRIQPSTARKSSTGGSHDCDTLSSYLNPSQKSPIPPRERSLLRRFSLLPQPVEPICLHRHSLAVEPVRNLNHKFSSPRGQLNQIHTTSRHSLHRPILSSPLTEVAFSSTNTSSTSLTKCDSDMPERPKFKPSRISSSPDIPSTVEAIYRPRGSRASSYTSPRRPSSINSLASSSSTLDVASPPESSAAAAPQPRPRPRPRPRPSTHRTRYSYTNNPYLTHPQSNKRPIWSPNHKPFYDRYPPSPSPRLSTSLYRNSSQSLGSRPPSFHPIPPALGPIRRSHSLNSSNASLQPATNSSQRPSSHATPAKAKEPLTADQHWNLAHAFAFTPRFSRLGLKGEGVILPIHAKDFRKARRNTSMKS…
PC9H_000201	CDS	scaffold_1	640446	641093	-		hypothetical protein	EOG092R0OHG	PF00111	IPR001041;IPR001055;IPR012675;IPR018298;IPR036010	ENOG410PN2J	C:(C) Energy production and conversion		GO:0009055;GO:0051537;GO:0051536						MRKGSNGLGWSLRRREFHSSCARLHGHLTRPEPGTGIKVTFKDSKGELIKTVEANDGDDLLSLAHEHDIDLEGACERSCACSTCHVILPQELYDILPEPEDDENDMLDMAFGLTDTSRLGCQVYVTKEMKEMGERGEIVATLPSATRNMFVDGEPIQ
PC9H_000202	CDS	scaffold_1	641780	642441	-		hypothetical protein									3 (n2-13c18/19o28-48i69-87o93-111i)				MITYTTVATLLVLSYDGACIVSDIPQQVTWFGALAILSQLIVTFLGMSPSVLKEILRQSSLIATMSRDSFLMFGIITVFSAIIIRYAALMAHVIPQFFLSTLSVIGCRMILNMLETASREGDTIRTASVHLSMFLDGSFVSGEMESL
PC9H_000203	CDS	scaffold_1	643804	645391	-		hypothetical protein		PF04193	IPR006603	ENOG410PIXB	S:(S) Function unknown				7 (o12-29i49-70o90-109i146-170o186-206i218-242o248-271i)				MSDTCTPAHDWFTATLTAGLCVGLMISYAPQHFRIINKQSSEGLSPWFLLLGSTSSASGFLNMVALQWGIVKCCRYVSVGSCAEITLGVVQVGLQWFLFTMIMVLYMIYYPPYLKYVAANEHEDNHDTRPSSSPIKKPMKRAEWSLSIILSWVVVVHIILISFTTFFLLLTATPSPSPSLPLPKQVLSWATFLGVSSAILAAIQYAPQIAHTYRHKVVGALSIPMMCIQTPGAILMVTSIALRPGTNWTSWITFAVAGVMQGTLLVMCIFWKVRQQRLGIDDFGHSLAPPSPSASGGSTYDSNSRGEEEVPGLVTGEGDDPTAVSMALAAALESAVETDLRAHSDSRIDAAQAEDSERTPLLGNPTKDNEAGGHETNHGWFGWLRR
PC9H_000204	CDS	scaffold_1	645546	647172	+	AP1M1	AP-1 complex subunit mu-1		PF00928;PF01217	IPR001392;IPR011012;IPR018240;IPR022775;IPR028565;IPR036168	ENOG410PGQF	U:(U) Intracellular trafficking, secretion, and vesicular transport		GO:0030131;GO:0006886;GO:0016192						MASLIAILDLKGKPLIQRSYRDDVPSSYIERFLPLVLDFEEEGQQVTPCFSSQGINYMHIRHSNLYILALSKRNSNAAEIILFLHRLTSVLVEYFKELEEESIRDNFVIIYELLDEMMDFGYPQTTESKILQEYITQESHKLEIQVRPPMAVTNAVSWRTEGIRYRKNEVFLDVIESVNLLVNANGNVVRSEILGAVKMKCYLSGMPELRLGLNDKVMFESTGRTARGKAIEMEDVKFHQCVRLSRFENDRTISFIPPDGEFELMSYRLSTPVKPLIWVEAAVEHHKGSRVEYMVKCKAQFKRRSTANNVEIYVPVPDDADSPKFRASTGSVQYAPDKSAFVWKIKQLGGGREFLMRAHFGLPSVKSEADVEKRAPITVKFEIPYFTVSGIQVRYLKIV…
PC9H_000205	CDS	scaffold_1	647938	650716	+		hypothetical protein		PF00082;PF09286	IPR000209;IPR015366;IPR030400;IPR036852	ENOG410PIK2	O:(O) Posttranslational modification, protein turnover, chaperones		GO:0008236;GO:0004252;GO:0006508	SignalP(1-15)		S53			MKLLLLASLFLAAQAAIITHPHATVLHEKRDLLPSGWAHARRHDPSATIPLKFALTQSNMHRLEEFLNEVSHPKSPQYGNHWTAGKIAETFAPSEETVSTVHNWLVGSGIPAERIKISSTKGWINVDASVAEANDLLRTEYNVYVHESGKSHVGCNEYHLPAHVAPHVELVLPSVHFDARVEKRGPSTAPVTISNLGQPGFGITPKTTGKVPTEVLKFHNAKQDAAAAADYCWLILTPDCLRTLYGLNYTTQAAAKNSFGVVEYTPQAFLQSDIDMFHFNYSREIMGKTPNVISIDGGKSTLTTQRSVLQTQVQNFAYNGESDLDLEYAMNLVGVQQNITLYQVGDLVQGASFNNFLDAIDGSYCTFEGGDDIYQDPHYPNTQTGGWKGAAECGTVKPT…
PC9H_000206	CDS	scaffold_1	651354	652008	-		hypothetical protein		PF05730	IPR008427	ENOG410Q0UD	S:(S) Function unknown			SignalP(1-17)					MFFSLASIALLAVSVAAQGGFPQCAIQCLDPTQSVNGCGPTDNACLCNDTAFISSTTACIDTNCEGDDVANAQAAARSLCAAVGVTLTSTPASEPTSSSSSVTAPSSGSSTVSGSSSAPTSTAPASSTGSATTSPAPAQTSNAASFNGVNSFAGIAALGLAALAL
PC9H_000207	CDS	scaffold_1	657098	658390	-		hypothetical protein				ENOG410Q48H					7 (o12-31i52-74o94-114i126-144o164-182i203-221o227-245i)				MLEVLAGPEARLYLRAYFCVSASSLVVYDYCLTIDDELHRIWRQPINVAKCLFLVCRYVGLIPLIILTIAHLSLRPDVVYSRHHCMAWNWFQTVVFHILLLAVEGLQLIKIHALYARHIKTMSAVYLFRTGTFVAVMYTSATTIRLASYDSSCLVNDIPKQANYFAAVAMSTQVFLSIMIVGHQTVWENFQKSSWLGTMSRDSVIACSIIVALLAMIITKAEELAHVLPSIFIAILSISGCRMVINVPSSSEKEDYGDGRTIATGSVKLSTYFESSLDIEPELDLHG
PC9H_000208	CDS	scaffold_1	659396	661485	-		hypothetical protein		PF01612	IPR002562;IPR012337;IPR036397	ENOG410PJ2P	S:(S) Function unknown		GO:0008408;GO:0003676;GO:0006139						MNLVPTLAINTYEITMKSVFKESGSLAARCRVPSPTRTQNRRRVPSSTPEPQATRTQSTANHDDDDSEIEVFGPFEIEDPLLKGSVPKSRKRRACGTEPLGASSSSALRVAGSATHAENLHPFFTKYLKIPSVKSRPLTTLVDSMQGLSLEGESLASRRPTSSASTSSPRLSAQLIPHPAVPSKKAEAQPEEDTEDQHELYSYTLYEPAPARVYVTNEDEANDLVGMLQGPIGFDMEWRVFYTRSSSGPMKVTTCRTATVQVCDERMILVIQVHRMQRFPQKLQELIESKTIVKMGANILNDGAKLFSDYGVAGQNLVELGALARQADPDAAKLFITKRGTVRNSTAGIASLAKVVAKYCGKILEKPKERTSNWEAPLTERQLSYAANDAHSALMAYLK…
PC9H_000209	CDS	scaffold_1	662029	663116	+		hypothetical protein				ENOG410Q48H					6 (o29-51i63-83o95-115i136-157o169-190i211-235o)				MVVHVAADYPVSLGVIHDWDATVRNHASLAALTVLVYEYFTTLSTEVAVIWRGHFSVTKALFLVLRYGALALQIGSQTFFAVAEQKYPVPKTSCLAWHSCQTVVFQILLLSVEYIQVRKVYAIYSEYRNYFICLRIFRVFNFALVSFTTVSTLRILSYDGACLVGNIPWHVACFGALASSTQVILTFLTVCPKVMWRSHSAVLSIVTRDTFLTCAGLLAMCIIISTHASVLAHVIPTSVSFTFHLSPPS
PC9H_000210	CDS	scaffold_1	663758	665841	-		hypothetical protein	EOG092R05R4	PF05187;PF13450	IPR017896;IPR036188;IPR040156	ENOG410PFF4	C:(C) Energy production and conversion		GO:0004174;GO:0022900						MLPNRGVQLRHFVAALGKSSKSSRSRGITSTSARLNRETFDAANVERAEDDVDVCIVGGGPAGLSAAIRIKQLAQENDKEVRVVVLEKGSETGSHIVSGAVIEPRALNELLPEWKSMSGHPLTRPATSDSMLLLTKNYHIPLPHPPQMSNKGNYIVSLSQFTAWLGSVAEELGVEIYPGFAGAQLLYSDKGVTGVITNEVGLDRQRRMKSTFEAGMAFKAKVTLLGEGAHGSLSKTVISKYNLRANSQPQTYGIGVKEVWRVDPEQHQPGKVVHTLGWPLDFRTYGGSWVYHMDDGLVSLGIVIGLDYKNPYLSPYRELQRLKHHPYFRELLSGNSTRLAYAGRTLNEGGLQSVPQLHFPGGALIGCSAGFVNLAKIKGTHNAMKSGMLAAEAAYKAVQ…
PC9H_000211	CDS	scaffold_1	666076	667434	+		hypothetical protein		PF03907	IPR005605	ENOG410PRM5	S:(S) Function unknown		GO:0019888		2 (i48-75o95-118i)				MPPRSTPPPRGSTIQLNDAATYSDLLRFEERLKTNAANLQRRKHRYQLFLGQLLFLIAFLLCEVLLPPHISLLAIPYKMLLQWLLPEIYTPDVEITLHPAFASGLLFVSFTTLVLFFASGMYSDKIAYANKYVPHANRALRSFNMFLNVRKPPLRSKLRFNPIRFFFPRPETTYTTTTDSPASSPPATPADAPSRSPSRSVSRTRSTALPIAPIPPSNNPRGELIFSSRVDKNFRESYERYRSAFERRKEKQRQLERSQKGWFGISWLRFNLPFVKDGGEVSDGGGTVSSPDKAVPLVRTPTGTSTRSSKGGGSRSGTPPSTPKSHISRQRDRSTSRPRTGGSRQSTPPVSPSPSRHGSMRGRREGTPGDGSLSNLDGVVDRERERDTTLTLRAFALEK…
PC9H_000212	CDS	scaffold_1	667688	669920	+		hypothetical protein		PF00646	IPR001810;IPR036047	ENOG410Q0K2			GO:0005515						MSIVQPRRSSRRRTATTKANYSPNDAHFTEDEEQGPNDGDGDGATQQWSAKRQKTKCSSTKKTFSKKLVGSRKRGRLSELPEMPLDILFEILQYLDPLDLLRMARTTKDLRSVLMNRSALSVWKSARANIPFLLDCLEGVSEPAFANFMFTTNCHVCLSPRAAYSFAARCVRYCRICIDHKVIWKPYSNLDLLGALPGGRAASFKLMYTYEVNRPNAPLAGVWLQQDYDDLLKEYQEFPDSATKAEDFLELKKSTASDIGEREYEYRDWMEQQEALRAMHRYAARDKRRDAILDKLTTAGFAEDIRGMATWEIQQFRNHHMVKQPRLLSDRIWKNIEPAMVALMLMFRDQRKQRERAKIIAQRRELFARMVNLYERECPLGEVVPSAADLYFLDSATTV…
PC9H_000213	CDS	scaffold_1	670467	672235	-	SOF1	rRNA-processing protein sof1		PF00400;PF04158	IPR001680;IPR007287;IPR015943;IPR017986;IPR020472;IPR036322	ENOG410PGD7	A:(A) RNA processing and modification		GO:0005515						MVVSDYGAHADTILIFQQKISVLQHAPSEHLPSRPGDPTPVSRNLNPIMHPFARSRERIRALNAAKMERMFAKPFVDSLEGHVDAIETLVKKPGDLSTVASGSWDGGLIVHNISQRSQLLNIPQAHKGKVSGLCFASDRLLSCGVDRTVKLWSTDKSEGQKPLSVFAGKSAFNSIDHHRSDGLFATASNLVQIWDETKSSPISDLTFPTSTETITAVRFNLSESSVLASIGSDRTFTLYDIRTGKAERRVIMQMRSNSLAWSPTFPTILLLASEDHNLYTFDIRHVSTPTQIYKSHVSAVMSCDWSPTGTELVSGGWDRTVRIWHEGRGTAPEVYHTKRMQRVSSVLFTNDARFVLSGSDDGNVRIWKAKASEKLGVITARERAAIEYRESLKQRWQMD…
PC9H_000214	CDS	scaffold_1	672416	673610	+	VPS26BL	Vacuolar protein sorting-associated protein 26B-like protein		PF03643	IPR014752;IPR028934	ENOG410PHXC	U:(U) Intracellular trafficking, secretion, and vesicular transport		GO:0006886						MAAYFFGSPIDIDVKLDGEEARKHVEMKTEKEKVISCPVYYDGESVTGQVTIRIRDGKKVIHEGIKVEFVGSIELFYDRGHHHEFLSLSQELAAPGEMRQAQTFDFNFKNVEKQFESYQGINVKLRYFIRVSISRRMADVSKEQDLWVHSFRMPPDSNNSIKMEVGIEDCLHIEFEYNKSKYHLKDVIVGKIYFLLVRIKIKHMELSIIRRETTGSPPNQYNESETITKFEIMDGAPVRGETIPIRLFLGGFDLTPTFRDVNKKFSTRYYLNLVLVDEENRRYFKQQEITIFRIPEN
PC9H_000215	CDS	scaffold_1	674596	677444	+		hypothetical protein				ENOG410Q4EF				SignalP(1-19)	2 (n4-15c19/20o35-56i96-121o)				MSSLPLLLYISFLFLFARAELINTLPQRFQNVTKALLLIFIPGIIVTSELGSFLGIEYLRKEPLRDDYQAAHLYTVELSRDEVLLVGFRTSSSETLWSFFTSISLALFTAYQAINFVLALYRLMRVVLSTRKQEEEEGLNRFNSYGVSPSKESMTTRSSDKITLFKGTAWILAGVKLGAVETVVGFVTSGGFGVSLTRRVLRMLSRAFIIIGLAKGLDTLEDFELVKLELDAGKRANRQSSQIRNLISNPRLSTFHRLSPSASDFRPNNGAASLTYNDPVPPPQYNRKLQKKSSRSTFAASPIMSPKATLTPMDTPTMADFAKLREIESGKRVTIRRANSGVPTLHMRLSSYDLPSPNTVADSIKSRPLSDFYAPHQPSVRPTLSIVYGDDEGNVSSVK…
PC9H_000216	CDS	scaffold_1	677941	678710	+		hypothetical protein		PF05603	IPR008493;IPR031318	ENOG410PQU0	S:(S) Function unknown								MFGCVVAGRLLQTNLQQVDETHAYFELSGASTINHISVFLLGTVPFPEGYGASVHFYWPGKGFQLLGMLSNEKPSAIFRLRGNFTSSATNTANPNAFTPAPAENSTSDVVAILGLAIEPLDQIQVQVSGLPTAIVKSTIAQDVTRDATLMAERVVKHLFNYLSSFVGSVPGGFAPDVVVPVGMIAKWYDSFLSKVKTGGIGFLERDES
PC9H_000217	CDS	scaffold_1	679785	681985	-		hypothetical protein				ENOG410PZKE									MLIRLTPQAPHPTVLFTIAFNNLPETLPSPLSWANQLNCLAADELDVPTSHHCLDKAACIPSLLESITFDLTTMTASCSFVDGVTAEWPLFDPGCLKALHGVVNDVSMSALEAERERFREKEEEQQRLLDLMTPPPSPLKPKGHKKQRSLLMTMIASLVPLGRQSLAPTLPTSAPPSPPPSPRPAASSFASFLPPSSGPDARTLRRRARSTLVDTFRRYILPELTRHFPRAGYYAWIVQSTLRRASMRANALIEKSGGHIPDLGRPRRGDWIEFGQDPFLDTTTACTPSSLYDDDDDDTDTDGSSVHTPSSSHFNTMTSAYTSQFASSQPSTPYKRPPSSHSLPMYTPRPTLSPQEVEEYHILANLIARLQHLFIAVQSQNTHIENDNAHHEAMLEIRS…
PC9H_000218	CDS	scaffold_1	686159	690927	-		hypothetical protein		PF00172;PF04082	IPR001138;IPR007219;IPR036864	ENOG410PPKH	S:(S) Function unknown		GO:0005634;GO:0003677;GO:0008270;GO:0000981;GO:0006351;GO:0006355						MSSTNASNASLYFISELPRTAQIHHRHPIVKLEASSSPDLPPDAPTQLLHLQYLASHLDQFPLDSHSSSAGPSEPATPVSSYNASAPPLFRFGQKPGHNYMSTQSWPSSSIGSPDLSAGPSDTIYRTKLDLGAMHHHHSTVAFDEYDDDVSELVDMAGASTSHGGSAHDKSVRRRSSKACDQCRKSKCKCERTSPNEPCRSCVTLGTPCTFLGPSRKRGPPKGYIDAIEARLHQTEALLGIVLSSSDERAQTLLHDLSQDPLAKEIIKRVDNSSYGCQGRKRGDSTGGTKRHPASSSDSAHAQTSGKYTADKIDLQSTHPSNEWQDHVLSILRSASMMRGTLIQGDPETQISPTEGRAHRDVSSASRPAPPTLRVALPTDDHSDDERDQPIRRQRRRVD…
PC9H_000219	CDS	scaffold_1	692395	696223	-		hypothetical protein		PF08598	IPR013907	ENOG410PSEH	S:(S) Function unknown								MPGSANSLGSLSSPSPSLSPPPAESSKQPEAASNGLGTDSDLSELTEEEQETEKQKSKQIKAQRGSGHSHPRVRRPTTHQPRRGRKKRGGTLVPPAMWGWVPKAVEEEEEEELAGPPRAMEEEEDDEDASGAGRSSGHSRSAHPARQDDDDDEGEPEIDVVPRDANDPESVEGDNDATESGDEEPVYPKSQRSRLIRRPTARKQDPDDSDSSAYSASGATPRDPENDDSDSASEHHVKPDEIESEDETEPEGPKESPLDVANAKSPAGDAKKPVVAIPAVDDSMDIDATAPPVHSVAPLVTAAAPSSIMAGSAVVDAPSPVSSASSAANSPASSRSPSPAPLPPQSPPDEPQENDSRTTKDSKSLQNGTKEPDEGTPPPKHVPPPLDLANNIAEVVEQD…
PC9H_000220	CDS	scaffold_1	696418	698471	-		hypothetical protein	EOG092R0ON6	PF03126	IPR004343;IPR036128	ENOG410PK0X	K:(K) Transcription		GO:0003677						MSDFDDIGDELLELAGDGDKKRKKKSSHKSSKRRKGDPMDSQSDEEVQEALDVVNDPYPLEGKYKDHADRDRLLGMSEFDREHTLALRSEEMERHRFQQSVSAKLAQSKGDDNVAHAAKRQHTARGATKEKTRRLEELKARRKAKGERDRTKTGSPKRDRSSSPMDMETSDEEDEDGQISKLEQEDEKHSKLFNKAPPAQEEKICRADLEKCRLTRSMISRNCLRPWFGDLLKGAWVRYLIGNTNGVPIYRACEILGLVSEGVKTYKVDDIPVHVSFELKYGKAIKIWPMDRVSNAPFSDKEFEHLERTWQGDKEKLPSKFDAEKKAASINQMISQPITESDLNLMLENKRSLQPHKQSSAALTLERSQLNAQRTLALRRHDDTEVAELDAKILELNGR…
PC9H_000221	CDS	scaffold_1	699238	704547	-		hypothetical protein		PF07728	IPR011704;IPR027417;IPR036465;IPR039891	ENOG410QE9N	S:(S) Function unknown		GO:0016887;GO:0005524						MAPAQRRLNQLQKELVPTRASVGTLKLGSINFDVPESLAPSRLPHTKDLLDIYDPVNLDNLHFMLQKYLLGQDIFLVSQPGPYARRLALTFARMINSGFEHITLHRDVGETELKQGREIREGGNLVYVDSPAVSAVKHGRLLILEGIEKAERGIMPVLNNLLENREMNLDDGTHIIHPHRYALLDTDRDDTTGKLFIPAHKDFRVIAIAAPVPPYPGYPLDPPFRSRFQARFIDPLGAAMALHKAVESPSPPSIFTKLRDLILSTQYASESRHALEAISRSTLPPFPQTSLLRLGALVTMFPPPDELSPGQLARVILTIHPALIHAQFQAWAILGRQVEEAGLGRLGAPSMFDSDERIGLLGYRVEGIKRVSNDTAEVTFTPPHKAPPVSVTVPAGPKE…
PC9H_000222	CDS	scaffold_1	705643	706398	+		hypothetical protein								SignalP(1-22)					MTSSSMKLAVVVCFALALLSIAAPTPITRDGEANIPGWQSIYGVGPVVQSKAIEGEAPGIPGWHPIYGHGPIVPSHFNGREVDAPVPRPTKYAIDYLPNKGQGNVDDASPAPTTTAKKPNPSKYAVDYLPGYPVTTAPKPNPSKYAIDYLPGYGSRPSSPTTVDDNANLPKPTKSSKYAIDYMPTWAVPAPKETSV
PC9H_000223	CDS	scaffold_1	707419	709002	+		hypothetical protein			IPR029033	ENOG410PKYM	P:(P) Inorganic ion transport and metabolism								MVNLASGLLGAILLVRHGDRLEFFQDPLTYTPSETTLTPLGTVQAFNQGDFFRQRYLQPGPNRIDDLNTDLVDINQLIVRADAAGEGNIIFESCIAFLQGFYPPTTQFSTTLANGTTVLGAMGGYQYVPIESVEPNQDISLNSFTSCPNFELHTSAFYNSPEFLAKAAEAAPFLNQLKPFLGDRDVNFTNMIFDFVNVNMIHNATFLQSLPPTFAAQAYDLGNFHERGVFSDTSPSGIGNIAIRTILPSIFTNLKRIANSTDPLKFALNQISYKPFISLFNITDVPTGSPDVFGIVDYASAVALEVRKPDDREATVSLTFRNGTTTDARLLPIFNNQTAVPISQFISTLSAAAVDNTAQWCTACNQHTLRGCAVCTA
PC9H_000224	CDS	scaffold_1	710420	711800	+	SSC1	Hsp70 ATPase ssc1		PF00999	IPR006153	ENOG410PMVB	P:(P) Inorganic ion transport and metabolism		GO:0016021;GO:0015299;GO:0006812;GO:0055085		12 (o12-28i35-51o63-83i95-119o125-147i159-182o188-214i235- 254o319-338i350-371o398-419i431-454o)				MAQQTAIYEHPPATIILTISSFLFLINVADALFEWLINAGLIGSLIIGVVYGPQAADILPNDLIISLIQLGYIGLLILVFEAGLTTNTQLLIDNLLLSTVAAVIGIGVPIGLSMLLLHVGYGYTLLQSFAAGAALSSTSLGTTLALLKPEWRQMRAGAVLLSAALLDDIVGLVIAAIIAQLADTNGGIPWQIIVQPILVSVAFGILVPLLAYLLNRMRVTYHLSRVVPKRYHERSLLFIIVIVLSGFVAGARYAGTSDLFGAYLAGILLNFLTKGYTTEDIILAAEEQKTTHSYPPPVVHEGLSAMTFARYISPALQSFLSPIFFASIGISLPIRALGVADGSSAVIWRGIVYAILMFLAKAVVGGTIFLWPAPRVTEVEVAVLGHSPPTLTRSQASVF…
PC9H_000225	CDS	scaffold_1	711914	714255	-		hypothetical protein		PF00295	IPR000743;IPR011050	ENOG410PNPK	G:(G) Carbohydrate transport and metabolism		GO:0004650;GO:0005975	SignalP(1-24)					MSLKTILTALLALWLLAIVRPTECRPDTERVCSVRPLGAGRDDTEQVLRAIDTCGHGGRVVLEAGSFNITRKMTWDLRDSRVDVHGVLSFQPDIEYWLNATNTYRVVFIQSQASWFVVTGENFVIDGHNTGGIDGNGQVVLPNPHPISSPWWSFFATRTRADGDGRPISFTLWRTTNALVKDFHIQAQPFWCNTVAESQGVIYGESPILFHSWVERGPFGGDAGKKGDPVASTSTDWHDSDADGMKCNASNSDPSFAGKNIVPNTDGINTYRSTNVSLLNWDITCGDDCLAIKGNSTDLTVRNITCRGGNGIAFGSLGQYANLSDNVRNVDMRDLKMIRIDPNIQPNMGNGVYFKSWTGTVNGSPPTGGGGGTGVVDNITISNVLLDRVNAPLHLYQTN…
PC9H_000226	CDS	scaffold_1	715118	717295	+		hypothetical protein		PF01794;PF08022;PF08030	IPR000778;IPR013112;IPR013121;IPR013130;IPR017927;IPR017938;IPR039261	ENOG410PGUE	P:(P) Inorganic ion transport and metabolism;Q:(Q) Secondary metabolites biosynthesis, transport and catabolism		GO:0016020;GO:0016491;GO:0055114		6 (i76-96o108-134i164-187o207-228i240-257o277-293i)				MPNRSSGLDFSDGAPAVGPDVPAQPSFLQRNKTERRRLQGLQRTNSVKSPGNGLFVPTTFGQKFNLWMINEGGRQLFFGVWIFLHILVAVFGFFHYQMKDNLNTARSLFGYGFTIARTAALVLHIDVIFILLPVCRNFISFLRRTPLNDIIPFDKNITFHKATAWSIVAGSFVHIAAHMVNFAKLAMLDPNATTPGKIFVGFLRANFATGPGLTGWIMTAALGIMVWFAIEKRRRAHFEWFWYSHHLFIVFFINWQLHGMFCMIQPDRPPFCSFNTIGVFWRYWLVGGVIWIFERILREVRSRHVTYISKVIQHPSDVMELQIKKEKTTTRAGQYIFLSCPEVSYFQWHPFTLTSAPEEDYISVHIRVCGDFTRALALAVGCDFSKEKDKAPAGGKVVG…
PC9H_000227	CDS	scaffold_1	727115	728108	-		hypothetical protein		PF00808	IPR003958;IPR009072	ENOG410PR88	K:(K) Transcription		GO:0046982						MRSSLIPSGMPRPTTLPPISAKQQQEQVSEGIEQFELPKSLVTKIAKSAVPPDVKLQKDVVLSLVKSSTVFINFLGADSAHDIALSKQHKSISASDVLKALEAVEFGDLVDPLQRQLKKYRNSAKSEKKRAAKGKSSAAAAAASAPAPAGGPLSISITLPPKGKDKGKAKEVSISAPGPAPASDAMDVDDQVADVKDDEIIEEEEDEAEIEEEPEDVMDEDEEEDELVDTVALEEEELRKDAKGLDEVGMKDREDGI
PC9H_000228	CDS	scaffold_1	728264	729367	-		hypothetical protein		PF13532	IPR005123;IPR027450;IPR032854;IPR037151	ENOG410PJ37	L:(L) Replication, recombination and repair		GO:0051213;GO:0016491;GO:0006281;GO:0035552;GO:0006307;GO:0055114						MTQPNATLPTMNDCADNLSFTTGLGAGDSFIVEDILPPDLAEDVFERVLEEVGWGKMFHRGGEVPRLVAVQGGVDEDGSFPIYRHPTDTAPPLYPFTSTIERIRAQVDKVLESHLRRHGGTYVGPLNHVLIQHYRTGADYISEHSDKTIDVVRGSYIVNVSLGAERVMVLRAKRDVVGKAPSSTGGDTTSDHEAPTAVSHNPPRPAQRIPLPNNSMFVMGLDTNKKLLHGIPTDKRPLTVKSETERNKGGARISLTFRCIGTFVSGDAKKIWGSGATAKTRSEAKDVILSVEGDGKSEALIEAFGGENRDSEFDWERWYGGGFDVINFGLSI
PC9H_000229	CDS	scaffold_1	729684	731989	+		hypothetical protein	EOG092R077C	PF09431	IPR016024;IPR018556	ENOG410PI83	T:(T) Signal transduction mechanisms;Z:(Z) Cytoskeleton								MTLTNTSYAPAISLEDEFGIVYLVENAQQFWSELEDLLNFPKDEIPTLSLLDSTLKRYLALCAAYHEQYLQSPLQLEHACQLLLDSELFAFHSERMCEILVEDTRSSTDPHAQFIFFNVLLAFGRRRADFFRSHKRWQPLVPLLMDHVLVEIDPDTEDTYTGSQQTPMVVPIEAKLRSLSVRLLYEVCRVQKLSVQDLRIFDDAFIDYLFDLVEQTRDMSDDSFNYSVIKLIVSLNEQFMVASLSAQSSELVDPNADPAQPSTIKNRVLRVLMRRLNSTKTFGENMIFMLNRAERTPEGLCMQLLVLKILYLLFTTHGTSEYFYTNDLCVLVDVFLRELVDLDEESESLRHTYLRVLHPLLTKTQLRFTPYKRPQIMRCLESLISNTSFRDINSTTKRL…
PC9H_000230	CDS	scaffold_1	732578	733853	+		hypothetical protein			IPR038753	ENOG410Q3FA			GO:0007249						MRFSFFRAPGRLPTPSRERPAPVARPAVRAHFSRSARRFHEKLARGAGLAHPYNRTLRRPGSLKAPQSLRKDDAGPTPTIPRRRAFMPGGMQSVANMSASTVIPGGPVAEPPTAPPATMAGPAWMPGGFQPVAAPSFMEAQATIVLPGSESFFRRPSEQYSYDSTDDDDKIFRRQMAVMMKAHYMKKGLMEHRDEVERIVAERKREAEMARRSTTREEHARLVAERLARLEAERLEIERLRREEAQRVEMERLHQERLAREAAEREARRLEEERHRLARLREARAEQAKLAAAQAERERVEKAAQDPLQHAFFVYEGKWKELKDGLSPNFRKLRATELPWPVFFNVAEPADITEARVAEFLLHSARPEAQGKARRLVLKMEVVRWHPDRFDTKVLPVMA…
PC9H_000231	CDS	scaffold_1	739554	741435	-		hypothetical protein				ENOG410PW0J	S:(S) Function unknown								MSYRDVRIWARATVPGSLGNLKFNNLANQFPPNPGASNAQPSGGFQTVEAWPQLLSQTPPPRPPSAFESEFGDPKSVPNLDDFYVRPRPTASDRVDATPTRKRARIESNNALPPPTPHRAYFAAIRRGGGTRDMSCTEWSRACVELLGDIVDGARSTLGWTDDGDAVAEVLSVAKALKNTLREIDSMVSVDDDIFMSQPSAPAPAQDKGFDGFKSEIKDLFLSLEVNLSSRISNVERRLGSVPLPSSVPNPTQITPSSRPQAPTPSSYASAAKSAPSSQPKPAQQPKAVAPAPASKSNTKFVVRFRGRLPPEAERKSSHVLFHALNHAFSNNAAARNDGLEILGAEWNRSGNIILTFPSHVNPNAVYNHINLLHPIVDHGLDEVIISHDTKWSKAVCSR…
PC9H_000232	CDS	scaffold_1	741749	743846	+		hypothetical protein		PF13598;PF13600	IPR011935;IPR025554;IPR037291	ENOG410PI76	S:(S) Function unknown								MSQEPSPEFVPHVIELTSATDGNIVKVHLSPGRAEVTRVYKLALEIGVNQIKISGLPEEIDDTIRVEGRGDATIHDVSITPTPLAPSDPATERAVAREYRSAENEARRYKDASFFLENFLRKVELVPCDHAQIPMILRTYEHASSKLDNRLIYIEEELEKLRLSRTPLSYLMPLTATVVMFAEHAGEAEIALVYAVPNASWNATYDIRIDMKSEDAPFSIRYKAVISQRTGENWDGVQLTLDTFTPKLDTGVPSLGLCRLTPVMVQPAHPRQCSRERSPRRDVVCNSERYQARSRSYTPPHRPPRSMPHATVPVSGFGGLNATYDVPGLISIPNEAQAHIVTIAELELDASFSWLVVPKLDLSAHLKAQVKNVSEYTLVAGPTNVYIDGSFVARSRIPD…
PC9H_000233	CDS	scaffold_1	744000	744456	-		hypothetical protein													MNGTVLTYERAHAFMAFYSQQFALGKPIIRIDTLPHKPGSSAIMMFGESRMSYGSGPTDGAAKRDCYLKGAHKVESFDPEIWKLFVASEAPKAQATQERPAAPAVCTSTRPRARLLDPYAAQSHQFVCRTSQHVRSSATFSATVVRSSTAR
PC9H_000234	CDS	scaffold_1	744796	746809	+		hypothetical protein		PF13598;PF13600	IPR011935;IPR025554;IPR037291	ENOG410PI76	S:(S) Function unknown								MLQPPASPSFTHQIDLSSECSKIDKVSLYCGRAEITRSYKIDVKTGRNQIKISKLPSLLDDDSLRVEGRGPATIIGVAVARPPASTTATASPILSSLEDLREVTQKAIARCTKAISSIESYLVTLDTKTVGSQQIGPMMDTYETEAEKLDLRLLKLEAELNELNKRIEQERALRAAAQRRDSLLGKTATIDLFVDAEGQVELVLIYAVVQATWSAVYDLRANISSDTNTVNLVYKAAITQSTGESWDDVSLTLETVTPTFGVGLPRLDPWRVGVYKPVPRFATRKVGMASRGPLMASSGYELYSEDLALDKELSPEIVHRETIVTNQGHLSTSFQVPGFISVPTDGEVHTVTVVELRLDAAMAWISIPKVQPKIQIKAKIKNASNFPLLQGIASVYVDG…
PC9H_000235	CDS	scaffold_1	746934	748811	-		hypothetical protein		PF01053	IPR000277;IPR015421;IPR015422;IPR015424	ENOG410PI7P	E:(E) Amino acid transport and metabolism		GO:0003824;GO:0030170						MECWPFDPKIASGQPIPPVEHAISVSLPTWKDNLNYEDDKKRLVGALVRGYPRFIVHERIRTLGSLCVQRFGGSPKESCLLFPTQQIADDCREFIERRSSLAGPTIYAQLAHLRLISTENKRALDLHIVIFPLETFPLAKQFWQHAGLGITTRYSNLCLQMSETATYEIPSPISTTKKTRDDVSFLEANCHYDLELDSDVEVKDALRLRIAGFFNTPDSVSAQDSGGSPRSVSSEDVFLFPTGMAAIWNAHQLALSSRSNSKTICYGFLYTDTLKVLQKWGSGCHHLGRGLEPDIQELDHLLETLTAAAELSEPPVSALFTEVPSNPLLQSFNLPRLRSLADKFGFLIVVDDTIATAVNVDILPYADIVTTSLSKFFGGYADVMGGSLVLNPQGRHYEA…
PC9H_000236	CDS	scaffold_1	750347	750677	+		hypothetical protein													MAEVVLANGTNITLLQAREFLEFYHQFHNLQKPTIMTFTLPHLQDVTSAVMMVGSQRLANGKGKNKQIAIRNCQLKAAINLELYDPELWKAFVAFEREAKTSSSNSREY
PC9H_000237	CDS	scaffold_1	750909	752889	-		hypothetical protein		PF13598;PF13600	IPR011935;IPR025554;IPR037291	ENOG410PI76	S:(S) Function unknown								MSKELLPPSFIHQIDLVSAESSKIDKVSLYVGRAEITRSFKIDVKTGQNQVKISELPTVLDKDSLRRVKVEGRGLATIFGVTVSDKHTTAALSQSLQSLEDRREITQKAIARCTKAIASIEAYLATLDAQTLGSEHLGPLLDAYEAQAEKLDLKLLKLQADFKELDNQISQEHALWAAEQRRRGLVSKMATIDIFVETEGKVELVLIYAVAGASWSAVYDIRADMSGDNNPLKLVYKAGIKQTTGESWDNVSLTLETVTPTFSAALPRLDSWRVGVYKRPLTSETSMPVFRLQSTGMSGDNIGGWDRERSRISITHRETVVANQGNLNASFQVPGFITVPSDNEVHTVTVVELQLEATMAWIGIPRAVPKVHIKAKIKNASNFPLLNGIASVYVDGSFV…
PC9H_000238	CDS	scaffold_1	753303	753901	-	UBI1	Polyubiquitin		PF00240;PF01020;PF11976;PF14560	IPR000626;IPR001975;IPR019954;IPR019956;IPR029071;IPR038587	ENOG410PMVD	J:(J) Translation, ribosomal structure and biogenesis		GO:0005840;GO:0005515;GO:0003735;GO:0006412						MQIFVKTLTGKTITLEVESSDTIDNVKAKIQDKEGIPPDQQRLIFAGKQLEDGRTLSDYNIQKESTLHLVLRLRGGIIEPSLKVLASKYNCDKQICRKCYARLPPRATNCRKRSCGHSSQLRP
PC9H_000239	CDS	scaffold_1	755283	757347	+		hypothetical protein			IPR040151	ENOG410PX4F									MSDFTVVEPKGWEYDLQSVYSAWMGFFQHHGVPWYDRTWGHLFSSFEEFLVFSWPVITVTDSWTGRAHIVTRLSSINAFLKMVKTRFGETLTIPPNIIRIAPYETSSRPLRNIADYASYRKLHQTLAATHLTALKSRVRACETGIGIKTIADLWAKRDKTFLALDFEWSERNKTVLEWGYAAVRCSHLAAQECWPPVPDKNYMKGHYIVAEHVDKIVNKHSPTHPWLYAFGESQVVSKNHTTHTLYSRVNSSFTSPDSEATPNNLVFVGHGIHGDLAKLEELKIKLPHNMFVIDTALYERTLYHSGKRPAMSDPATGRPRAEGSTLSLENLLHSLAIPLPATPSIPAVTGKLSPKRSSPVESPSGAPNLSNGHTSPIPPVMRPLIPPGCVLNNSGNDAF…
PC9H_000240	CDS	scaffold_1	757782	759036	+		hypothetical protein		PF01988	IPR008217	ENOG410PHKX	S:(S) Function unknown				4 (o103-126i234-259o265-285i297-319o)				MASNNGSAAPVAAVPLPPRSTIKTKPPVWPLDEASSLHPTPLPSKCARNSRAGGVCCKELKDDDERTLIDPDVVRDVIIGLSDGLTVPFALTAGLSSLGESRLVILGGVAELIAGAISMGIGGFLASQAERDHYRYLKHHTAARVIRSCEGEMEREVRDVLGPIGVDDKTCSAVARCLRDVEVVETDDAGTVNGASSRVPDEEEGKLRWSSDVGLTAFLLKFGLGLEDIPTIRLYASAFTIGLGYLVGGLIPLFPYFFIPRAHIALMYSCLFTGIILLIFGAIKARVTGAGQGVKGYVWGAVSTLMVGGLAAGAAFGIVKMLEG
PC9H_000241	CDS	scaffold_1	759244	759889	-		hypothetical protein													MTTGIEASIANVLARIAETGEYRMKFTAFQARLSEQEQIKQANAYSESQFTSTLRRDFTTPYASTALGESCLAFRIPNYTGHADGGYACNTCGHSSMYHQHHRAKCVTTLKEERSSDKLAKERFLAAETEKDKLEILHIKISENIKAMEADIRNEHIRALQQKKAVVESAEKSKRSK
PC9H_000242	CDS	scaffold_1	759955	760593	-		hypothetical protein		PF01926;PF04548	IPR006703;IPR025662;IPR027417	ENOG410PZX9			GO:0005525						MSILLIGETGVGKAAFLDLLANIGDEVGGSVAGSQTKKPILYQIASANGCQVRILDTPGLANVRGYEWDSKHKASIAEAIRRETETIDSVIILANGTQERLGIATQYALTVIAPMFPHSIIDNIAFVFTMVSNPFQFNFQRSVFQPELRDAKIWAIENPLAQWFKFKDYGTCDEYLFQDMRDTLSTSYVQESAQSHG
PC9H_000243	CDS	scaffold_1	761312	763214	-		hypothetical protein		PF00928;PF01217	IPR011012;IPR022775;IPR027059;IPR028565;IPR036168	ENOG410PFIY	U:(U) Intracellular trafficking, secretion, and vesicular transport		GO:0030126;GO:0006890						MVVLAASICTKGGKAVLSRQFRDMTRARIESLLASFPKLVPTNTQHTTVETADVRFVYQPLEDLYILLITNKASNILQDNETLHLFARVVSDMCRGAIDEREISRNAFELLGAFDEIVSFGYREQVNLMQVKSVLEMESHEEKIQEIIARNKEAEAKEELKRRAKQLEMQRREQQRRAAGSSSGGSGYMGGGITGYSPVPQAAPEPIRATPSPSTTQTTTRAPAFRGSGMKLGSKKTKQAELIDALGGEALATTPLLAEASVPQSPSVSAPPEPKNERGSLPEVEHESIHIAIKEQISLSLLRDGGVESMEIKGDMNLHITDPDVAHLRLTLAPPQADGIPASAIQFKQHPNVAKFTPGQDRVIALKDPSRAFPVNQSLAVLKWRYAGTDESNVPLSIN…
PC9H_000244	CDS	scaffold_1	763415	765179	+		hypothetical protein	EOG092R08KJ		IPR000504;IPR012677;IPR034138;IPR035979	ENOG410PQYT			GO:0003676						MGDTITKRLHISGLTPAITKEDLQKRLSSFGTVKSLDGFGLLDGVGRPRKFGYITLETTAPQLSKCLNILSGSTWKGTKLRLGDAKPDYDERLAKEREEQEPPRKKRRCTGIHAEDMSIVTPENVSERRGWKVTPLGRIVRPMRMRPGKPLAEPVQSNTSTAKTNPKERKKKNRVKPPPTRARRRTIDPTAWGSTHLKGIFLDAIGNGTRAHVTAENMDKWEESAYDSSEESEGEGEGIKEMDSIVPNPTPTEVSPMRAAQPAPLAKPLPQPSTNADQDLTIEKTNTLRLLDSLFGGKENDSWVGQESLSDIDETEANTHLAAARYDAEPIEEVPMEVDEPTQAPSLPDDISQTQVAKPTAEQREATNLKSLFASREEDALGLVGFSLFGNLGVDLELD…
PC9H_000245	CDS	scaffold_1	765352	766539	-		hypothetical protein		PF12697	IPR000073;IPR002410;IPR005945;IPR029058	ENOG4107T66	E:(E) Amino acid transport and metabolism		GO:0008233;GO:0006508			S33			MTEGHAPFRVGTETYQTWYKVVGDLGAGGRPIVCVHGGGGMTHHYMLPHKELNSRLGVPVIFYDQLGNGESTRIPDAPKEFWKAELWVDELENLVKHLGISDDFDLLGHSWGGGSLSALPGILSINCVSGMLSGQFTATRAPAGLKNLIIADFPASVPLLQASTDTILKQNPEVAAIIQKHTEAGTFADPGYLAATQILHKKHFCTIDPMPEDLMTSALSIMKDPTVFSAMVGPSSYNLVGNLVGWSIIDKLHNITCPVLLLSSPHDAVQPFAIIPWFQNINKVKWVELYNSSHMPMFEEPERYFQVIVDFLTRESPNAPLVTK
PC9H_000246	CDS	scaffold_1	767238	769450	-		hypothetical protein		PF00069;PF07714	IPR000719;IPR008271;IPR011009;IPR017441	ENOG410PFTR	T:(T) Signal transduction mechanisms		GO:0004672;GO:0005524;GO:0006468						MSSTTAVAQDHVEDGDARGMASAAPAAWIPEAQATSWTQVSALSAPEASQSFMAPSTVPCQYRTGRTLGSGTYAIVKEAIHIKTGKYYACKVINKKLMEGREHMVRNEIAVLKRISSGHANVVTLHDYFETTHNLYLCFDLCTGGELFDRICAKGNYYEADAAGLIRTIFKAVKYIHDAGIVHRDLKPENLLFRSPAEDADIMIADFGLSRVMEEEKLSLLTEICGTPGYMAPEIFKKSHGKPVDIWAMGVITYFLLAGYTPFDRDSQQAEMEAIIAGDYKFEPEEYWANVSETARDFVTMCLTIDPRSRPTAAEALQHKWLADEQPHFVPIEGTEQPTDLLPHVKKAFNAKRLWKKAAFSIRALNRMSMMAGGGLTGDAAILSDDVRRFKEESEKEVM…
PC9H_000247	CDS	scaffold_1	770031	772023	+		hypothetical protein		PF13598;PF13600	IPR011935;IPR025554;IPR037291	ENOG410PI76	S:(S) Function unknown								MQDQPPAFDSVNVMELRSVDASKITKVSVYTGLAEITRLFKFDVKMGQNQVKISGLPNVMGEESLRVEARGSASIQGVTIGSTPQPPVPTASEELKNLRKEKRLAESAIERCNASIGSIRSYVASTTTVNIPSVNLGQLLQSCETEGARLDSQLLELEEKLSAVTEAVEAEEKKLEGGNVEQDGLGMTASIGLFAHEAGEIELTLIYAVRQANWSAGYDVRVNMHASDKPVVLLYKANITQSTGEAYVPLTLETVTPTYGADIPTLSSWYLSVWTPPRPELRIKKKKKSTARLSSDDDLVMYTTAACAPLPMSSRGAFQAEIVSQGTLSATYQVPGLISIPSDSQNHSVTIIELTLGAEMSWITVPKVDKRVHLKAKVKNASEYSLLPGEASIYVDGSF…
PC9H_000248	CDS	scaffold_1	772296	774273	-		hypothetical protein		PF13598;PF13600	IPR011935;IPR025554;IPR037291	ENOG410PI76	S:(S) Function unknown								MQDQPPSFDAVNVLELRTADVSKILKVSVYTNLAEITRLYKFKVKTGQNQVKINGLPDLMDSDSLRVEARGPASIQGVSTGPTPTPPVPTTSQELKKLQKEKRLVENAIERCKASIAALRSYVSSVSADRVPSENLGQLLQHCETEGERLASKLLELEDKLTTSDAAIEAEQKRLSGADEVDTVEYKLDGSDGPGKLYLGLTASIGLFANEEGDVELTLIYAVHQATWRAGYDVRVDMQAKDTPVVLTYKAIIHQTTGESWTDVPLTLETVAPTYGAHIPTLSSWPLSVYAPAPPSPIALASYASAAPGGFRLSRKTTRGAFQADIVSQGALSATYQVPGLITIPTDGQNHSVTIVELELGAEMSWIVVPKLDKRVHLKAKIKNASEYTLLPGEGSIYV…
PC9H_000249	CDS	scaffold_1	774491	776519	-		hypothetical protein		PF04548	IPR006703;IPR025662;IPR027417	ENOG410PZX9			GO:0005525		1 (n4-14c25/26o529-546i)				MSDLLTTSLPVELAQGGAIPTPSNAATPPTSKPDCNPSAPATQPKPDTTPAPPSSNPSPAPAPTPVVAPGPVPPVVRKMPDFPPWVDNSKMTLTPWKKDSLTILLIGETGVGKTAFMDLLANVCAGRVMEDFKVEHKKDNEAGGNGSGSQTNKPKLYHIKCANGYMVHVLDTPGLADTRGTDFDDAHKAAIAETIKDQIETIDCVLILANGTQERLPIPTKYAITVISGMFPSSIVDNMAFIFTMVANSLQFNFKRDGLDVAVRKTKFWAIDNPLAGWVKYQKSLNDEEPPEDFILEDMRETVHATYAKTMKTLNSFFKWVDERKVQPVKEINDLYNMSNKIEASISDVLARITQTEAQKTELIKLQNEMETQKQIKKINVNYTTIINKPFHVHEGTGE…
PC9H_000250	CDS	scaffold_1	777510	779571	+		hypothetical protein		PF02493	IPR003409	ENOG4113MR7	T:(T) Signal transduction mechanisms								MGLKQNEFTTPGLGRTAFLGQLYNGSSEQLLNTQLFEKAALEASIREENHPSTMISYSDVKSQSDRSKSLKITAELAVSIMGGMISLSGSGEYLDASKSNVSSHEVSATCIVQKKNKRLDIGQCIKQPKWEQVSAMGATHVVTAIRYGGTLIANIVQKDSTSESGRVIKGSFKASFMEGMAGNFSASGKASVDSDEKTKELNSSCEFKVYGDWASAEMEIPTTVGGVFEVIKKWPSLVGDGVPCTLTLTPITQFVDGSPEALMLYELEQHKLLSLCQAYDEFFRLAGRRARLVSLLEGGIGDFCPTFLDECRDRKLAVDKAMGKAREELSKFLISVRKEGADKVEGVQAFIDRITTEFKDGIKICTKDEAKLELLVAINSLTQAQKAPLASINELRNSM…
PC9H_000251	CDS	scaffold_1	779962	781677	+	CEL3_1	Beta-glucosidase cel3A		PF00734;PF01341	IPR000254;IPR001524;IPR016288;IPR035971;IPR036434	ENOG410PKJU	G:(G) Carbohydrate transport and metabolism		GO:0005576;GO:0004553;GO:0030248;GO:0030245;GO:0005975	SignalP(1-22)			GH6		MFKFSTLLGLVALVPAFTLAVGEWGQCGGINYTGSTTCDAGLVCNVINDYYHQCLRGGTVAPPTSSSSSSGPSVPPTSTSTSSGPQPTPDAGNPYIGYDIYLSPYYADEVAAAVSAISNPALAAKAASVANIPTFIWFDVVAKVPTLGTYLADALSIQQSTGRNQLVQIVVYDLPDRDCAALASNGEFSIANNGLANYKNYVDQIVAQIARTCCPLVTSAITDLACLSEYPQIRVVAVVEPDSLANMVTNLNVAKCAGAQAAYTEGVTYALQKLNTVGVYSYVDAGHAGWLGWPANLGPAAQLFANLYTNAGSPSFFRGLATNVANYNLLNAPSPDPVTSPNANYDEIHYINALAPELSSRGFPAHFIVDQGRSAVQGIRGAWGDWCNVDNAGFGTRPT…
PC9H_000252	CDS	scaffold_1	782484	784533	-	RRP9	pre-rRNA processing protein		PF00400	IPR001680;IPR017986;IPR019775;IPR020472;IPR036322;IPR039241	ENOG410PFHE	A:(A) RNA processing and modification		GO:0005515;GO:0034511;GO:0006364						MPDAFFSSTKPRKRKRTQSVGGADRSSRPAKKQAKPDAHSRGKRVNGPSKVNGGKQKKRQDEELHSDRTDESDGGGIDDMDLRAASEEAHSGDEYADETPADKRLRLAQLYLESVKKGLADGEFDAKEIDKELISARLRQDVLEHSGKVHQFIANSFNFEDPPQSSMKTRGHRLSVTSAVAAESARYLFTSGKEGHIIKWDMTTGKKLATLFKVRSNGKGKGKAPPAGDVKGHTDEVLALALSSDGKYLVSGGRDRRVVVWDAEKAEWIKCFTGPMCHRDAVSSLSFRKATHQLYSGSFDRTLKVFDLTPSVMGYVETLYGHQDHVLSVDALRLETCVSVGARDKTARFWKIVDETQLVFRGGGRSKVREMLEGGLRGDDDGEDNTMDVDGRSTKRKGN…
PC9H_000253	CDS	scaffold_1	784829	786035	+		hypothetical protein		PF00682	IPR000891;IPR013785;IPR027167	ENOG410PG5B	I:(I) Lipid transport and metabolism		GO:0005829;GO:0003824;GO:0004419						MVWPARVVRVASSSARNSSRKYATASNFVNIVEVGPRDGLQNEKGTIPVDVKVELINRLSRAGLKTIEAGSFVSPKWVPQMAGTAEVLSGIQQREGNHYPVLVPNQKGLDNLLSLPRLTDEIAIFTAATDAFTKANLNTTTAESLVRLRPVTEQAIKNGLRVRGYVSVVIACPYSGKTDYGKVREVAKELLNMGCYEVSLGDTVGMGTPDEVAEMIEEVKKSVPVEKLAVPASSEHEIFVQFHDTYGTAIANVIAALSQGIRTIDSSVGGLGGCPYSPGATGNVATEDVLYALQGSQYHVVGSHGSSGGVNLDEVVDIGWWISEKLGRESVSRAGRAIRAKKLREAAIAAKREAKL
PC9H_000254	CDS	scaffold_1	786539	788077	+		hypothetical protein		PF00155	IPR004839;IPR015421;IPR015422;IPR015424	ENOG410PGK7	E:(E) Amino acid transport and metabolism		GO:0003824;GO:0030170;GO:0009058						MRQLTPEALNPAILNVQYAVRGELAIRAEELRVQLKGENHGLPFDKVISSNIGNPQQKGLDQPPITFTRQVAALMEWPALADIAPDAFPKDVVARAKELHEAIGSIGAYSHSQGVPFIRENVAKFIEERDGFPSDPNHIFLTGGASAGVSLLISMLISVPHKSGVLIPIPQYPLYTATLARFNGVPLPFHLNEAADWATSIHDIEAAIEKAHREGVTAKALVIINPGNPTGALLDEDTQIELVKLCEKHSLVLLADEVYQVNLHKPTTHPFISFKKIVSQIQSPVPLVSLHSISKGVSGECGRRGGYFECTNFPANILDLIYKMVSVNLCPPLSGQIGVDTMIRPPNPGEESYDLWKKETDEIHATLAHRTKTMSGRLNALPGVSCVDSPGALYLYPQI…
PC9H_000255	CDS	scaffold_1	788481	789680	-		hypothetical protein			IPR032675										MMRDTASAVGRVQDLERLRNQFRRLFSLPGKYPAALTTKSVTSVQKLLLDAIRNMHDLKAVCFDFTRAHDTRQYLSVHEVWSLLSGRVDTLSIYICPDDAHLLPSTFSSILGIKHLYIELRGFRVTEVRGLTELINTASQSLETFAWKSNFCFIDFSSSIHRSFPILHVFPKLKRADLAVWNTTGSEVTTFLNAHGGSLEELNLEFSHPDGGPPVGVAALQLPSLRTLSIAWNWCKWGGPVTIPFQRLWSGANFPMLSCLEINDPYMKMDHVAFFCDVFRESGGNRIRRLSFHCEALNAETFDHLSEAFPNLHTLIVTVISLPKPRDKLWNIVCCPPSNYLLYSLT
PC9H_000256	CDS	scaffold_1	795242	796501	+		hypothetical protein				ENOG410PMZK	K:(K) Transcription								MARIAELRPVLPKPSPHEHHTTVADAGPVHHPSTGIPHASRHHGHAYSPYNRTYEGLHSNMGSDSYSVAQNNLGTLSDPQLPEGFGSQLTSQALQFATGWTDTFAQNVDNDGLSFPSACGCGDNCLCPGCLEHNPSPHRAPSPSAFAHCTNPGACSSCLDCTILSLPASIPPQGSPIPPLDPYQSQALDEWIRRVSGIALSTSETQNFARLPQRDPQQSQQISLPPNLHNGGGTISPLQQMPDLSESFVNAMRCFGETCNCPPGMCQCIQCDAYPADTPDLTFATSGVRGSLQYQQSTAAGSYNTSSRNGASSSTQQIPGRHPRPSARQGTTSQLSRTAAAGQMSTLDVVAADNARRAWTFNEPSAVSSGSSASYARSHSGSSSSLEDTFSSDTPFRDT…
PC9H_000257	CDS	scaffold_1	797204	798023	+		hypothetical protein				ENOG410PPD0	C:(C) Energy production and conversion								MSLNATYDAYVPSSFKEFFAKAKFQPAYTPFNDIRLKTLTPAQQSSFDLAQKITVPGMFHHSIRCFYFSLLMLRNGFPSNTPGVPQISSEELVNRVFHACILHDLGMTQHSSALSHPACGMSFELHGGIMAYEHLKDMEPKLLPEQLGDIVQGIMLHTIPFTTGRSSATGFLVQLSAFFDLQGYQGLGTSLAHVFDKQTVREIEKKYPRGSLVTEIVDQLHGQIKEKPNCLLSHMVRCLPTQMGASSHDTRTPIKPLEFASRAAAIKSLLAE
PC9H_000258	CDS	scaffold_1	798187	799529	+		hypothetical protein		PF12697	IPR000073;IPR029058	ENOG410PREI	S:(S) Function unknown								MPTLSSQHYVFDPRPDFPFRFAVKRLWDPLSPYVQDEDAYTLIMVHGTGFHKEHWEPVLDDLYELLPKQPGGVAKVREAWCLDTYNHGDSALLNENVLTQGYDKLCSWEDIARGIHLFLSGKGTGIDVDFSKRKLAGIGHSSGAVGLILSTTYHPRVKYSLLHLVEPMILPAFPPGIPNVLEAGAVKRRDIWPSKEEAMKAFSSRPSWQVWDARILKTYVEHGLTSLPTLSYPDITKGVTLKCPRHLEAASYRDGVTRTRAFWYLPTLVQRYPVHMLYGAVSDYYPGTIKEDVINNAGASNFASIVWAEGAGHLITQINPTQLAGEIAKVLAAPIPTHINSKL
PC9H_000259	CDS	scaffold_1	799924	801190	-		hypothetical protein		PF11754	IPR021740;IPR037525;IPR038491	ENOG410PY9R	S:(S) Function unknown								MSTHHISVFQHQPLPVQPRIHTSSPQLPNSHQPPLSHQPAGLDLIGEPIHFSTGQFAGQVVRAELKEIQKADLGRKYARVDRRPLDPPPVVLLKLYITYTVGNEQREEEVPDYEQVHNHGLVCTVDLFPVQGADQPPNGTSGQSSSSPSSYSTRRAHLEDGARSADYFSAAFPASQGNTPASPHPSRLIGASNIVHNIDGHSITEGSKQTHALVGATFVQPASVEYQGRKCLVFVFSASCFQIEGTFILRYRVFDLFSRPTESDHLAIQAECYGQRFKVYSTKEFPGLQASTDLTKHLARWGVRLNIRETERKRGKKDNTSVSPVLSNGKKRSIGSVSDAGHSENE
PC9H_000260	CDS	scaffold_1	801446	802777	-		hypothetical protein		PF00314	IPR001938;IPR037176	ENOG410PKA0	S:(S) Function unknown			SignalP(1-19)					MKYFQATGLLLAGVVGANARTFTVFNACPFTIWPAMFTDLNVAPNVPNFATGWEAGAFTSVSFSVPDNWKAGRIWGRRNCDFSSNPGPNSCLDGGCNGGLLCDAHTGTGVPPASVAEWTLQGDGNRDFYDVSLVDGYNLPMRITNNVGCPVADCAVDLGPNCPAPLKGPFDASGFPVGCRSACQANLDGNPGNSANCCSGSHNTPQTCPPSGVAFYDYFKSNCPNSYAYAFDEGSGTALWTCDSGLRADYTLTFCP
PC9H_000261	CDS	scaffold_1	803475	809481	-	FKS1_1	1,3-beta-D-glucan synthase		PF02364;PF14288	IPR003440;IPR026899	ENOG410PHH8	M:(M) Cell wall/membrane/envelope biogenesis		GO:0016020;GO:0000148;GO:0003843;GO:0006075		17 (i393-414o434-454i474-493o505-524i561-582o635-661i1215- 1233o1239-1257i1323-1343o1349-1367i1437-1460o1480- 1504i1516-1539o1545-1563i1606-1628o1634-1651i1672-1697o)		GT48		MPARPGKSSQEGYSSSPSTEAHLNDPFNSQPRYYDNESDNVDYGRRDTYASDTSHPGYNDPGYYDQNNYDAYPPPDTDSDGDVYGQRYAPSAESLAPPPRPAGVREDYPAWTVERQIPLSKEEIEDVFLDLTQKFGFQRDSMRNMFDFLMQLLDSRASRMSPNQALLTVHADYIGGQNANYRKWYFAAQLDLDDAVGQTQNPGLNRLRSKRGKGDTSSTDKKAPAHEKSLNSALERWRLAMASMSQYDRLRQVALYLLCWGEAAQVRFVPECLCFIFKCADDYYRSPECQNRMEPVPEGLYLKTVTKPLYRFIRDQGYKVVDGKFVRTEKDHQDIIGYDDVNQLFWYPEGIAKIVLTDKTRLIDLPPPQRFMKFDRIDWNRVFFKTYYEKRSFGHLLVN…
PC9H_000262	CDS	scaffold_1	811918	813192	+		hypothetical protein		PF00314	IPR001938;IPR037176	ENOG410PKA0	S:(S) Function unknown			SignalP(1-17)					MKLSIVSALALASAASARTFTVYNGCPFTIWPAMFTDLNVAPNRPNFATGWEAPAFTSVSFTVPNDWKAGRIWGRRNCNFASNPGPNSCLDGGCNGGLQCDLRTGTGVPPASVAEWTLQAGGNQDFYDVSLVDGYNLPMRITNNKGCPVAECPVDLGPNCPAPLKGPFDNVGFPVGCKSACVANLDGNPTNSANCCSGSHNTPATCPPSGVAFYSYFKQNCPRSYAYAYDESSGTALWTCPSSLNADYTLTFCPPP
PC9H_000263	CDS	scaffold_1	813389	814727	-		hypothetical protein		PF03372	IPR005135;IPR036691	ENOG410PN9R	T:(T) Signal transduction mechanisms			SignalP(1-18)					MWHLGFLSLLFVGIYVLQAPLLAASMRAVTWNLRFDSQPNNIPVSQSLASLGDPLQQPAFLNGSNERPWSTRRLRVAEHLLSEGIVLAGFQEALVRQVNDLAELFGSEWSWIGVGRDDGVQAGEFSPIFYKRSAITLLSNDSFWTSNTPFEPSRFPGAGSFRICTVAHFTLAREDGPRNFTFLNTHMDDQSDAQRRLAASLLLTRARFEAVTTGGPVLISGDFNSPSTGVDSGAYSIITGAALPVAINATFAQRFSVPDDQLPDFKMIDLRGQAPRRAVSTNFATFTGFTAPNDASHWSRIDFIFGGSNLEWTVDAYKVDSVLADDGALASDHRPVFADINI
PC9H_000264	CDS	scaffold_1	815272	818091	+	ERG7_1	Lanosterol synthase (Oxidosqualene--lanosterol cyclase)	EOG092R02K0	PF00432;PF13243;PF13249	IPR008930;IPR018333;IPR032696;IPR032697	ENOG410PHHR	I:(I) Lipid transport and metabolism		GO:0005811;GO:0016866;GO:0000250;GO:0042300;GO:0016104						MPDPFASQSPDSPFTDYARWRLRLGPGGRHTWHYLRTDEEISEWPQTDIDRYWLGLPLVSSEKIISIKPAKDAFEAARRGFEFVKHIQAPDGHLPGEYSGPMFLLPGMVIGSYASGQWFEEEERLEMVRYLLNRAHPDDGGWGIHVEGPSTVLGTSLNYCALRLLGVDKDHPAAVKARGTLHKLGGAAASPSWGKFWMSVLNVYEWEGNNPVPPELWLLPNWIPIHPWRWWIHTRNVYIPMSYLYRVQFKVEETPLILSLREELYTTPYRHIDWPAQRNNVAKIDLYSPHTLALDVLNILLSLTVESCPFPPLQRRALDRVYELICMEDENTDFQDLAPVSKMMQMVCRAHREGPNSEAVRRHAEARADFMWVRPDGMCVRGTNGSQLWDTGFVAQAVV…
PC9H_000265	CDS	scaffold_1	818321	819461	-		hypothetical protein		PF03435;PF05368;PF13460	IPR008030;IPR036291	ENOG410PVUI	S:(S) Function unknown								MSKTHAFVVGASGNTGGAIAKALLQAGTFRLSILVRQSSIDKPAVKELTDAGAEVVIGDASDSPEKLESYLKGVDVLISTVTMMVDQKPLILAAKKAGVGRVVPSDFGPTVPKGVMALQDMKLGVRDYVKELDMPHTFIEVGWWLSAMFPPLHSAKDTLLTRKMYVGDRSRPLIYSTLPTIGRMVARIVVDPRALNQTVVAYDGEISVSDAWKVAEKVTGEDFSDYPEVSAEEMERGCQQTENWMKQVVAEYLRTVFIRGDNTLAKALTSGSLDGRKLYDDLPYPDVEEEAKNHYASGFVLEYDYIPEEIISDVFRTV
PC9H_000266	CDS	scaffold_1	819889	820645	+		hypothetical protein				ENOG410Q4DI					3 (i109-129o141-161i173-192o)				MSRLKKSPPLERTSNTMRAALALVHNSPQKSSIGISVSKRTPIISQSSTAGTEAYWASRAMMAESALAAQTSRQGALQYLSYKQEVQSARDLAMLSSANDAKHAMLERVVLLLIGCVVLLVSVVIYLAVSTHHRISKQTSSWLTLPSHFTIPILSPFTSVVEHETSMLSSRTIAMLVLSLTCLLYFMFRLWLNRRPTT
PC9H_000267	CDS	scaffold_1	821729	823332	+		hypothetical protein		PF01926;PF04548	IPR006703;IPR025662;IPR027417	ENOG410PZX9			GO:0005525						MSNSDNSKMTLTPWKKHSITILLIGETGVGKTSFLDLLENVCAGRGADEFKAEHAREADSDTRDRSEKPQLHRITCANGSAINVIDTPGLSNAREFNEEHRRALAYFIEEQIDAIDCVLILANGTMERLGVSALYALSVISTMFPRSIVDNIAFMFTMVSSPLHSNLARESLPVPVRNAKILAINNPLAGWLRFKKALNSDDPPEEEIREELREEIKSNYDKGIKTLNSFFEWVDERRVQPAKEVNELYGLSNKMEALLSDVTARLSQVETQKTELLKLQQQIDAQKQIMKIHEQYKSVIIKHFWVHEGTEVHNTLCCAPDCYRNCHEDCPLGFTLDRDNIGRNCEVFSKQLGPDGGYICNECGHSSNYHQHYRARWVQKEVQEVNEDQHAKLRYQQAQ…
PC9H_000268	CDS	scaffold_1	824046	825753	-	IDP1	Isocitrate dehydrogenase [NADP], mitochondrial precursor (Oxalosuccinate decarboxylase)		PF00180	IPR004790;IPR019818;IPR024084	ENOG410PFHR	C:(C) Energy production and conversion		GO:0016616;GO:0004450;GO:0051287;GO:0000287;GO:0055114;GO:0006102						MSLPAGFEKIEVKNPVVELDGDEMTRIIWKKIREELILPYISLDIKYYDLGLEYRDQTNDQVTVDAANAIIEHSVGIKCATITPDEARVKEFNLKEMWKSPNGTIRNILGGTVFREPIVLERIPRPIPGWVKPICIGRHAFGDQYRSTDYVVPGPGKLQLVYTPADRGQKTTLDVYDFTGPGVAMSMYNTDESITGFAHASFKMALSKKMPLFLSTKNTIMKKYDGRFKDIFQEIYESTYKSQFEAAGIYYEHRLIDDMVAQAIKSSGGFVWATKNYDGDVQSDILAQGFGSLGMMTSELLTPDGKIIESEAAHGTVTRHYREWQKGNETSTNPVASIFAWTRGLLHRAKLDGNDKLRDFCLDLEKACIEVIDEDGIMTKDLALAIHGKDMKREHWVVT…
PC9H_000269	CDS	scaffold_1	826582	827820	-		hypothetical protein		PF01048	IPR000845;IPR011268;IPR035994	ENOG410PFFJ	F:(F) Nucleotide transport and metabolism		GO:0003824;GO:0004731;GO:0009116;GO:0006139						MAPAPTFETIASTVEAIRSQLPDGLKNPRVGIVCGSGLSGLATSMKEVVEVAYDNVPGFAKSTVPGHRSSLAFGFMGDNQKVPVVAMLGRFHPYEGHSLSTVVYPIRVLAALGIKDIIITNAAGALNPEIKVGTVVVVRDHLALPGLAGMNPLLGPTFSSTTPRFLPVSDAYSPALRRLVFLAANELSIPWSDFAEGTYAWVSGPTYETPAEGRFLRAAGADMVGMSTVPEVLAAREAGVGVLVLSLATNMVVILEKYRSIKEEVEAELLGKKVELPVEEVVSHEEVLLIGRQKGEMMKRLVEKIIDLIPASVRDESQK
PC9H_000270	CDS	scaffold_1	828118	829591	+		hypothetical protein		PF00795	IPR000132;IPR003010;IPR036526	ENOG410PVQJ	E:(E) Amino acid transport and metabolism		GO:0016810;GO:0006807						MPITLNPSNSDTRVFKVAAVQAEPVWLDLKGSVDKTIAIIQEASAAGAKIIGFPEVFIPGYPWTIWANDFTTCQPILKEYQANALAVHSPEMESICLAAKNASATVVLGFAERDGGSLYISQVTITADGKIANHRQKIKATGYEKVVFGDGKAQTIHNVIQTDLGRVGSLSCWEHIQPFLKCHFYAQHPQIFVGSWPPAFPHQGQGPYSISSDACRSMAQVVAIEGGCYGIISTQVMSQAGAEKMKVADFPWLSVPGGGFACIYGPDGRTLTKPLDSSAEGILYADISLDKIGETKMIADMTGNYSRPDLFRIVVNGRNKDMVEYEDDEELEAAAAHNREIDNAGGSKTF
PC9H_000271	CDS	scaffold_1	829862	834131	-		hypothetical protein		PF04082	IPR001138;IPR007219;IPR017896;IPR036864	ENOG410PJIW	S:(S) Function unknown		GO:0005634;GO:0008270;GO:0000981;GO:0003677;GO:0006355;GO:0006351						MPQTSKKTGTNVQKAHDKESKRARGAMSCAECRRLKLKCDKTVPCSSCRRRGCESICPNGSLITGQGTRFVLADTEKLHQKIGQMSDRIRQLEDALFVLQSSLTSETHPLLTRDLLQIKSSIDLHSAVDSQDGTVEQEDIDESQYIDSFGTLAIRDDGAATFYGRSAGSEDEEASPPPEIAPQSMRNTPTWQNALPSSIAELSSSFPFAGNSSGVNLEQMVDEFLPQWGDAWRLCEFYLEQAPWFFGAVTKRQVHEEILPLWYSEAACMAPNTSFPPHNQPHMQNAGQFAAASVPIPKGTAHDLALLFVIFCFGALTDNELPPAPDNPIAHQYFQLTRAALSMEPVIDRPPSVATVQVLSLMAIYEGLCSGENSIERTWALMGLATKLAQSIGLHKDCA…
PC9H_000272	CDS	scaffold_1	835043	836565	-		hypothetical protein			IPR001025;IPR011011	ENOG410PQ2B	S:(S) Function unknown		GO:0003682						MKLKHCSRNTISMARRRAPRLTLVKNKSKSSKNTTTDAEIPTQQEWRNMHQYGRFNVLDEEGTGYVFKVGDNAIILPPESEAMRRKELPEYRYWVGKIKDIRGRNVDTDQPDVWAHVQWYYSGEDANELTNEFDKASCSNYERIISNTHDYVSSSSFEDVVKVKKYHEDSLDQADIEDTEFFYRYQLEYKTKEISRFTHEDDPPEAKETPRTPGANTCICKTPYSPSASSVLMHFCPRPSCRRWYHAKCLKGIKSMLNVKNTDAEAGRRYLATSPFTDAPIRLPGGDDVAASPPTKKRRTNHAVTITPIDSSQDPECKARYDALPDDLLQAAQQPIVKGRALGGGHVVGNIRLVALARKAVYGIIDGDELEDDWEQSINPNAALVHQSVQLLLCPKCRS…
PC9H_000273	CDS	scaffold_1	836745	837891	+		hypothetical protein		PF03134	IPR004345	ENOG410PSH1	V:(V) Defense mechanisms				2 (i40-57o63-80i)				MLFYLTSRIVSSAGAFLYPGYASYKTLSQRPASEDELERWLMYWSVLGCIVGVEYVAEWLISWIPFYYTLKTVFLLYLALPQTRGSSYLYIHHLQPFFHTHESQIDAALASFKARVYAFLQERFRAIWDQVAASLGQQPQQANFTPATGISDTGAPPSMGDPVSGPAQLATSLWRSYGPGIIASGAALLRQGAANATTRTNPSAPSLFNSPPATPPVAPTPTQSVLERRRQLEAELAALNAMPLHEAIPIPSMAGGKASSSSSRDSSSSDVRLRERTMSSSRTFEEIEVPSDIEDNDGQPSDAGYESARPAAQSRASWFGWGGGAKEGYQRVKSD
PC9H_000274	CDS	scaffold_1	838303	839610	-		hypothetical protein		PF11327	IPR021476	ENOG410PPAV	S:(S) Function unknown			SignalP(1-19)					MKVISKLIPLLAAALHVSAYGVITDVSGANGLHGVGFGVVSTITTLDQFRQQSSIINDIEIAGGLTGICGRTLGGGVIDVQAMLAGIASTGGLPTAFPGGFVKMKLFQPDTGGIGPYTCEVSPSATGEDFAGMAIRMDILRRFDPTTTTFSLIAQIPNGVTCTGGPNANACLVRCRNAVIAGSFGGCVAVTTADSGGATGAAAETDVVFDANDAPNAMVPPSVPIAVPSTFVPVAAPPLASAPPLGTRPPAPAPAPFAARPPGGAAPSLGAAGLSLGAAGPSFGAAGPSSGAARPPLGAAGPSSGAARPPLGGARPPAGGRPLAPAATRPTTVGALPPGSRSRPGFSRRRHSRQ
PC9H_000275	CDS	scaffold_1	840672	842782	-		hypothetical protein		PF13598;PF13600	IPR011935;IPR025554;IPR037291	ENOG410PI76	S:(S) Function unknown								MSQESSPEFAAHIIELTSMTDSKIVHVNLSPGRAEVTRAYKLSLQVGVNQVKISGLPTEVDQDSLRVEGRGAATIHDVSIAPTPPATADPEIMSALVKEHQSMANKVRRCKDVSAFLEKYLRNIAAVPSDHPQLPMIMQTYERESSKIDDRLMDLEDALEKLRLRRDEELKRTTQAQPSDPLQLTATIGIFADNGGDAEIALIYAVPGVSWQGSYDIRINMQSKDAPFTLKYKAAISQSTGENWDNVQLTLGTISPTFGLRVPSLGSYRLTNSSEYPPLIIPQQAGPAYPQPMVVPCSRSSRSRSRSRSRSRSYSPRSRRSRSRSRSRTRRTIIVPPPPTPMIMTHATIPVSNFRGLSATYDIPGLISVPNDARAHNVTIAELSLDASFSWLVVPKVDL…
PC9H_000276	CDS	scaffold_1	844660	846833	+		hypothetical protein		PF00067	IPR001128;IPR002401;IPR017972;IPR036396	ENOG410PJ8D	Q:(Q) Secondary metabolites biosynthesis, transport and catabolism		GO:0020037;GO:0005506;GO:0016705;GO:0055114	SignalP(1-16)					MILVALLLLLPIVVFAWRWRKIGHRERFLPPGPPTRFLLGNAPDIPRTLPFVQLSRWAAEYGELVSVKILNQTMIVVNSGPAVKEIMDKQGVFSGNRPQAYLIKRAEGEYPIFSNLDERIFKGSRRAYHTFLTSEAIASYLPMQQVEYARLMHDIARSPEDFIPHIKRMSTSIMVTLLYGKPVSDFGDNKHLLYFDAMKKFTELTDPWAHPPLDIMPILKHVPARWARWKGLCEEAKRLRGAFFDDITEDFEARYHAGERTGSFLEKVLDHPNHFDMTIEEIRGMSRLLMDGGVETSASYIQNFILALACHPACQDKAQAEIDRVIGGERIPTLEDFDDLPYLRALIKEVHRFRPVLPGAVPHMAARDIRYKEHLIPEGAIIVMNTWGIFHDAEVFENP…
PC9H_000277	CDS	scaffold_1	847745	848767	+		hypothetical protein				ENOG410Q441									MGRWTQYDEDAYRLPAGIKRTAYDADTGVYTYRDGNGQTYVGSPHQRYGTLRPISQPPASTRPMFDKDKAPLSVDTKSPGPAPKSFADILSPDQVTSASPIRDGRSPTSPKSRFIDAVRRAAAPKMLDVVHHTTTTSKRESFASDSEKQRLLPKDVPQMSEKGRDPLIRSATSAGHRSSAPSARSATTASTLARAATSAGHRSSPPVSGLAKSSTTASSLARSATNASSRSGASLVRSATNASTYSNASTTSLSHLANAKPLRVESMKELPSVPTGKPHHSKSSSSSTSKRSSSQSRRPVEAL
PC9H_000278	CDS	scaffold_1	850112	850807	+		hypothetical protein			IPR016191				GO:0003723;GO:0004540	SignalP(1-25)					MSILTSSWFIAAVILAGLAVQSVHGASLGTNTEDVADANACKCKLKLGDGTFEGTNYSAKEIDEALEKYKNLAKLGKKDFMGFPKHFGGKDNSGNLVFPDVKACVPPLQEFQIHKAGSGDSPPKSADRIVIDANGVLCGCMTHTGMKNPNDFQACN
PC9H_000279	CDS	scaffold_1	851382	853343	+	BTN1	battenin CLN3 protein	EOG092R0ANM	PF02487	IPR003492;IPR020846;IPR036259	ENOG410PG9U	U:(U) Intracellular trafficking, secretion, and vesicular transport		GO:0016020		10 (i40-62o74-92i104-121o127-145i157-181o187-209i283-309o329- 347i359-382o388-414i)				MPTTQYASVSDHDDAGRHSRESLSLLDEEKGQETGLLRKLGASFFLFGLINNVLYVIILSAALDLVPPSTPKGIIAFCNIAPSLIAKVGWPYILKGRIRYTRRLLGCCCLSTFGMLVVAAFDSLYMRLLGIGIASFSSGLGELTFLQLSTTYAPPSVAGLSVGYFASGTGAAGLVGAFLWWEIRGLGVRIGVGLSSVMPFIIPLTYFFLLPSTSEFLYIDTSSSSYEERDLTTSFSSLPYTPLAATEDQVGEEEGSILTSVKRDVALTGSDKWRLVQPMLLRYMFPLFCVYLFEYTINQGIAPTLLYPVPSPEKYWLLSKVIHSIRDYYPLWQLVYQSTVFLSRSSISMGLPPLPQRLLPLPAVVQGVILIILATEAAVGFFPDDSEGLSVLMVFGLVC…
PC9H_000280	CDS	scaffold_1	855594	857943	-		hypothetical protein		PF00732;PF05199;PF13450	IPR000172;IPR007867;IPR012132;IPR036188	ENOG410PHJA	E:(E) Amino acid transport and metabolism		GO:0016614;GO:0050660;GO:0055114	SignalP(1-20)			AA3_2;AA3;AA3_3		MYLSLSVLSVSLLAAQTALGKLYTEPSQLRSTTYDYVIVGAGTAGSVLANRLTEDQKIRVLVVEAGRSNNGSDVANIRIPFNAPLASPGTPFDWNFTTVNQPSLNNLPEPYPRGKVLGGSSSTNYLVYTRGASDDYDRLAKIAGDDGWTWDNLHPYILKHSSIVPPADGHNTTGQFDPAWHGNGPLRTSLAGFPAVIDPLVIQTTQVLSDEFPFNLDVNSGNPLGIGWTQSTIANGTRQSSAVAYLGPVLFRSNLDVLINTQVTRLIQTGHAGGKPDFRSIEFAQNAKSRRFRATARREVILSSGAVGTPQLLMLSGIGDRKALSKVGIKAIVNNPDVGEHLQDHPFLPLQWEVNSNETFDQIFYNPDLAAAVLDQWNRNHTGPLATNPVTNQLGFLRI…
PC9H_000281	CDS	scaffold_1	858406	861180	-	DBP4	ATP-dependent RNA helicase dbp4	EOG092R04F8	PF00270;PF00271;PF04851;PF13959	IPR000629;IPR001650;IPR011545;IPR014001;IPR014014;IPR025313;IPR027417	ENOG410PFU2	A:(A) RNA processing and modification		GO:0005524;GO:0003676						MSMQSSTMAGPSRPSKNPKKKHAKPLKSKRVKRATELQKIEALDKEAMSYIAPADLSAFASLPITEQTKRGLKKAFFVDMTEIQTQSIPISLKGKDVLAAARTGSGKTLAFLVPVLEILFRRKWGPSDGLGALIISPTRELAVQIFDVLRSIGGFHSFSAGLVIGGKNLKDEKDRLSRMNILVATPGRLLQHMDQTLGFNADNLQILVLDEADRILDMGFSRTLTALLSHLPKSRQTLLFSATQTQSVQDLARLSLKDPVPIGVGEAGDPSASATPQSLEQHYTVCPLDKKLDVLWSFIKTHLQSKIVVFMSSCKQVRFVFETFCKLHPGVPLLHLHGKQKQTTRLSMYTKFTSTSHAVLFATDIAARGLDFPAVDWVIQVDAPEDADTYIHRVGRTAR…
PC9H_000282	CDS	scaffold_1	863758	866084	+		hypothetical protein		PF00732;PF05199	IPR000172;IPR007867;IPR012132;IPR036188	ENOG410PHJA	E:(E) Amino acid transport and metabolism		GO:0016614;GO:0050660;GO:0055114	SignalP(1-21)			AA3_2;AA3;AA3_3		MFPTFSLFSLALLAAKGAIGALLTDPTQLTTTTYDYVIVGAGTAGSVLAARLTEDAHVRVLVVEAGRSNEGPDNANIRIPFNAPLASPGTSFDWNFTTVDQPSLNNEPEPYPRGKVLGGSSSINYMVYTRGSADDYDRLAAIAGDDGWTWENLHPYILKHSSIVAPADGHDTTGEFDPAWHGNGPLLTSVAGYPAVIDPLVIGTTQEAAEFPYNVDGNSGNPLGISWAQSTIANGTRQSSAIAYLWPALNRPNLDVLIHTQATRLIQTGRTGATPIFRSVEFATGPSAPRFRATARREVILSAGSVGTPQLLQLSGIGNRDALSALGINTIVNNPDVGEHLQDHPFIPLQWEVTSNETFDQLFYNADLSAAALNQWNTDHTGPLSTNPVMNHIGFLRIP…
PC9H_000283	CDS	scaffold_1	867099	869427	+		hypothetical protein		PF00732;PF05199	IPR000172;IPR007867;IPR012132;IPR036188	ENOG410PHJA	E:(E) Amino acid transport and metabolism		GO:0016614;GO:0050660;GO:0055114	SignalP(1-20)			AA3_2;AA3;AA3_3		MLPTLALLSIPLFVAQSACAGAAGSVLASRLSEDPNVSVLVVEAGRSNNGTDVAPIRIPFNAPAAGAGSVFDWNYTTVDQWSLNGEPEPYPRGKVLGGSTSTNFLVYTRGSSDDYDRIARIAGDDSFRWENLKPYVLKHNTMVASADGHNTTGQFDPAWHGSGPLHTSVAGYPAVIDPLIIQTTQELPEEFPFNLDMNSGNTLGIGWVQSTIAEGTRQSSAVAYLWPALSRPNLHVLINTQVTRLLQTGRTGSRPAFRSIEFTQGPNARRFTATARREVIMSAGAVGTPQILMLSGIGDRRALTRLGIRTIIHNPDVGEHLQDHPFLPLQWEVNSNETYDQLSYQPELAAAALAEWNANHTGPYSNNPVMNLVGFLRVPDDNPLWQNYTDPSAGPNTPH…
PC9H_000284	CDS	scaffold_1	869829	870330	-		hypothetical protein													MILRERFNANSDAHSRGQVPRSVDISYSGWAPDLALAIYDSKSASKFTIFPARSWDILEYAPDFAAPLLTASDYSHTPSIKTVPVFPFSVHCLDSFFIIHNYYRTLEKGLVSAFVFDQGRLTASQSKDIFHSLILTAAALGVRSDGHAFWKICRDCHSQLCTKSSA
PC9H_000285	CDS	scaffold_1	870779	873106	-		hypothetical protein		PF00732;PF05199;PF13450	IPR000172;IPR007867;IPR012132;IPR036188	ENOG410PHJA	E:(E) Amino acid transport and metabolism		GO:0016614;GO:0050660;GO:0055114	SignalP(1-20)			AA3_2;AA3;AA3_3		MIPTLSLLPLFFLLAKSALASLFTDPSQLRSTTYDYVVVGAGTAGSVLANRLSEDRHVRVLVIEAGRSDNGTDVANIRIPFNAPIATPGTPFDWNYTTVNQGFLNNQPEAYPRGKVLGGTSTTNYLVYTRGASNDYDRLATVAGDDGWTWDNLHPYIMKHSSFVASADGHNTSGQFDPAWHGNGPLRTSAPGFPTVMDSRVMETTQTLPDEFPFNVDMNSGNPLGVGWTQSAIANGTRQSAATAFLGPVLFRSNLDVLINTQVTRLIQTGRASGKPDFRSVEFAQSATSPRYRATARREVILSAGTIATPQVLLLSGIGDRGALSRLGIRTIIDNPHVGNHLQDHPFVPLQWEVNSNETFDQFSYNPDAAAAALDQWNSNHTGPFSTNPIANHLAFLRI…
PC9H_000286	CDS	scaffold_1	874562	875197	+		hypothetical protein													MDLEMRCNGTFIEPTVLARGQYLYGERNLPPQYFIENDGSCTPSDLPITVMLCLTENDFYGNHWYSFLQVRTSVIAEYSTLIHRNLTEALRKRVPTGYRKDLIPTIKLNVPSIELFTLFYEFMVTKDDREMMRTLLPRECERDTRRFRNMPVWLYVTVEDFLRVPVTPVAAPLWNVYAQLRRQLKCPNHNPITWA
PC9H_000287	CDS	scaffold_1	878194	881539	-		hypothetical protein				ENOG410PZM7									MSTTQILFNSPALHSLKRDQLVKLCKIHSIKASGKNTDLVEKLKQHALSLQQAEQEANVTGEANVDMDDIEVAVQARLDLSQEAEHTDNSNAPDRRQMPRPSEQWEVVMDSIDEEEEDSSQNTVSSKGTLRTIGGSGNTTLAGEFGTGGSKTSLMSSSLKAFATSLGLNRTKGGSAHSVANMSTSMSDTSFASIPSSVPSLPNTMKKLDDQGELIATSAPYSSLPQSNNPPQTDHLTFVPPSPFPGAFVDDSDPMAMTEDATPLPGHPLRPGRPAPSAPNVRMSLGLNTPARGAAPTTTIRLVSGSVPNVASLFNDPDSGDKTTTSWGDTTWAGGDTPKLKPFATSFDLVLGSPGPLYPPLPLDELVNAQAGRQASSSKPQSIDAVLGTPSKKAQNNAK…
PC9H_000288	CDS	scaffold_1	883442	884228	-		hypothetical protein				ENOG410Q3IP									MSSSSQTRRRRAGSFVPSLPTTHEMPPSQVRPSQRTSLLAANYDPIDALHQYLSVSRVAVASGVPPFPNTVNMPIVCNGHLPTHALALYETSSDRPSQCYILPIDSRLYSRGFYTDILSQASAGSIPPSRSSDGTITLPLVPYPVPHLPSAALLLLFGMGLETQINTMAWRLLPPHVIEEFPNAAAMSQMMVRLGEEEFFSYLAYNQGIWKNVLALGPQDKQLAEMVKTVWNVTADAHRKRQRSQR
PC9H_000289	CDS	scaffold_1	886677	887967	-		hypothetical protein		PF01266	IPR006076;IPR036188	ENOG410PHSE	E:(E) Amino acid transport and metabolism		GO:0016491;GO:0055114		1 (o6-25i)				MRETTARHVVIIGGGIMGCTTAFYITHGKRPKGTTVTVIEPSTKGVAQGASGKAGGLVAKWAYPKDLVEDSFEEHERLAEEYGGEERWGWRYVNCGSWEGKSESANTNPNTAPEGTKKKDLHKTAELDAVLAEIFAQPREKKGMPEDLDWVKEELSGHYTPMAELYDTAQVFPYEFTTSMMNLAMEEGATLISGRVTTINKADGQVTGVTYIDNETKQPTTISATDVVLCAGAWSSSLVPELPISSTRAHSIIIYAKEDVELSPYVLFTEIMLPSGETVTPEIYGRPNGEVYVCGPGDDFPLPATVDEVEVHKPACQSLWDSVTGISKELREGTLEFEQACYLPLLDVASGPVVGELSKVAKKLWVATGHSCWGICNAPGTARILRNGIMGDSPPRAAS…
PC9H_000290	CDS	scaffold_1	888135	889372	+		hypothetical protein				ENOG410Q4B0									MTSSINDWDSEPKFGLIVHNFTDSDRSSFSSDTAILNSARSVVKSSATSRYGNVYTLSTLPPRVRGSRVLDMKEWGTAVDDNEIYDIQELEEFHSHLTRHEHSASSPPRRPPSPSQAEERPRKRLKVEAGSLFSWIPQPHIHTSPYRPRNATVTIHPFSKAKPIILPPHTFTDFEPLPQTRTAWIVPVRGTLPWEGSSPAVTHTSSDPSDLKPFDGTISGIMWNKSSLVDFWTFLLTLRDKGTLGSIGISFHTSHSSTRSCTQISTASAHKGYQGPSRVASTVDKDASQNSERSSSSSRSNYRSIIKDVDYIKIYHDGAVAMRVRSVLDAWRYIGPSNDKVRVLLEAKLVLLDERARGLLIC
PC9H_000291	CDS	scaffold_1	889860	890795	+		hypothetical protein		PF00568	IPR000095;IPR000697;IPR011993;IPR033927	ENOG410Q3MK	S:(S) Function unknown								MSHHYTTGFGRESRRTSINLHHSCLPPQANHVYAVATARIYHSQFSSKSDDWAYSGLRGLLVFGQDKDAGGEHWFRLIDDISDRVIWLFRLPAGFVYELDKPFFYTFSGLSRKFGFLFGDDEEAARFGQQVTLRTAPRSPPVSPKPTRKAKRSPSSKNGQLSPAIVASPMANTFAHVSHVGMNVASGTIEHSQDLSPEWSRVLADFTNHREDTSYDSQPEMYSKSTTHIAPPAPKLGKKPSLSIWRMRRIRSTQQAA
PC9H_000292	CDS	scaffold_1	890999	893454	-		hypothetical protein		PF00070;PF07992	IPR023753;IPR036188	ENOG410PKX2	C:(C) Energy production and conversion		GO:0016491;GO:0055114						MLCKKMVFAGRPSRPASCLVLASGGRAPAYANSRAFSSSLPRNKERLVILGSGWGGYEVLRAIDKERWNVTMISPNNYFNFTPLLASCAVGTLEFRCATEPVRRYSPEVVAYQAWCDHIGKPCQRFGEEILILERSATDRFSSETIAMCTLITFSAPGMPATPPLSFETRSAPKADATTTQFPGTGTPFTLTYDKLVIAVGAYSQTFDVPGVKEHAHFLKDVKDARAIRTRILECFEQANQPTISDVERRKLLNFCIVGGGPTGVEFAAELHDLLHTEMERHYPGLTRFAKISMYDVAPQILGMFDESLVKYAEKTFKRDGISIFTSHHVERVEPGKLFVKEQGEVPFGLLVWSTGLAPNPLVQSASDVKKDLKTSSIITNDHLNVLKEDGTPYSDVWA…
PC9H_000293	CDS	scaffold_1	893762	896152	-		hypothetical protein		PF00069;PF07714	IPR000719;IPR008271;IPR011009;IPR017441	ENOG410PJKW	T:(T) Signal transduction mechanisms		GO:0004672;GO:0005524;GO:0006468						MQAHKTRKPSRRHGTCPTGSSFESSTGRRDASWPQSTRRISLSAKDAYPTTTPQSYFNVTGLLGEGSHGKVLLARSDGCPQAQDGLVYAIKVLPRKVPHGTRGTRELELLEWIAGRPQDRTSAGVCFLQKMIKGFERGDHLFIVMDRHCTSLADPAFAQRLNLSTSILAHSLTGLSASVSLPLESSPSLVSDSRPHREILATLRVLAAEIVLGLLFLHEHGIVHQDIKPANIMVSFAGHIVIGDFGAANLLDCAGSGSTSPVTCIVVKPEELVMHTPLYAAPEMVTRNPEQLLVYGQHVDWWALGVTLYELSTGDTPFPLSHRLQLSKDQVSRMYSRRSDGDTSISFGAFEKIMLDLGANSHGGDLDRGVGDFEALLKELLVHEPQYRLHGARVKEHEF…
PC9H_000294	CDS	scaffold_1	896700	897859	-		hypothetical protein		PF10342	IPR018466	ENOG410Q33B				SignalP(1-21)	1 (n4-15c21/22o284-303i)				MQYLVFTFLLVSLFLAAGARAGVYIIRPSAGSTCRGGEECTLQWMDDGQSPLLSAFGPSTAGLYTGQMKLVQPLGDVDTSGSRSFTFTVDPRAGPNSNDYYIALASKSLGEMAWSPFFRMSNMEGSFDSPLPSSAIPSLSTLSPPQSSSTTILPTITVGTLNTLPLSISSTSIEPAASSSSSTTPNPSDSSAPSSSATPATPSSTTGFASPSSTSISTPSTPTPLASLQATNVSPAPASTDVVEAISSRFVTSTLSPSSEPTASSANSNSSSNAASTLLRGSSLSSPLCVGAITLLVSFVVSLL
PC9H_000295	CDS	scaffold_1	898374	900569	-		hypothetical protein		PF00067	IPR001128;IPR002401;IPR017972;IPR036396	ENOG410PJ8D	Q:(Q) Secondary metabolites biosynthesis, transport and catabolism		GO:0005506;GO:0016705;GO:0020037;GO:0055114	SignalP(1-17)					MIPELLLLLLLPAVVLAWRLRRFGHREHFLPPGPPTRFLLGNVPDIPRSLPFIQLTRWAVEYGELVSLKILNQTMVVVNSGPAVKEILDKQGVLSGNRPQAYLIKRAEGEYPLFSNLDERVFKGSRRAYHTFLTNEAISSYLPMQQVEYARLVNDLATSPENFIPHIKRMSTSIMVTLLYGRPVSDFGVTKHLVYSESMVKFSELADPWAHPPLDMMPILRYVPARWARWKALCEEAKRVRGAFFDDITEDFEARYRAGDRTGSFLEKVLDHPTHFDMTIEEIRGMSRLLMDGGVETTVSYIQNFILALVCYPACQAKAQAEIDDVIGGERVPTLEDFDHLPYLCAVIREVHRFRPVLPGAMPHVAAGDIHYKNYLIPKGSMIAMNTWGIFHDADIKSE…
PC9H_000296	CDS	scaffold_1	900892	903618	-		hypothetical protein		PF07690	IPR011701;IPR020846;IPR036259	ENOG41KOG2533	G:(G) Carbohydrate transport and metabolism		GO:0016021;GO:0055085		11 (o126-144i156-174o180-203i215-236o270-289i333-354o366- 388i400-418o424-447i459-479o491-513i)				MATMSTPEDVHTDNLKAVEKGFGSEPNESNEDGTFHQQQLGPKAKRKHFFSSLDPAYADAVHRDAQSVQFTELDEKAVRKKIDNRVLPLVICRDLENGDVLIGDSGNAHVLKAFNDNFGISTNARWTLALSIFYVGYCLLEMPANVLQRHIGANRFFFISLGFWGITSLSFVYAKGYASLLVLRVLLGIGEAGYYAGMIYYLSFWYKRSELAVRISLCMTGTLPGAIGGLLAFGLVRAHTSLLVGWQFLFLASHSNIVCIEYTNFVQIEAIPTLIMAISILLFLPSFPFSAEFLSPREKAIAQARLNKDHNPQSHGGMSGWEGFKAIVSDINAWLFMLIYASFNVGVATISYFLPTLIRGLGFSDINAQGLTVAPYVVGWFMVVLQAWHSDRTKDRGYH…
PC9H_000297	CDS	scaffold_1	904081	906863	-		hypothetical protein		PF07034	IPR020795;IPR040855	ENOG410Q0VQ	L:(L) Replication, recombination and repair		GO:0005664;GO:0003677;GO:0006260						MGSSSKSEDINQKVVCIPFIEPESAIEQQVIRDDTDLPDGVELRLRAYQTAWSKCLARIQSIVHHLKDPVVSDVVRRVEGAYEDILPGLPQPELPVICISEPTGDSSTLNLIVEELTRNDRTLVTRLYPATCNNAMSAMKALISGFINQSDDEVGTKHKASASLANYDIQTLLAWYDALNDTQRLELVVVFQGFEQFDPLVVQDVCYICSLNVPRLPLVFLLGLSSPPSARFLSHTYPRATLCLLRVSNVTVPHGLPALEDVILKTFFDLDFQPDIDIGSSAFTFLVDYFMRHNSGIDAALTILQLAYMKHFEDPLTILVNDNLLGTSSLSEAMEKLRQPQSFPFLDSLFARVHAQSEQAGAEHIDLWHQETIDSLFRSLDKERSAFRDHTRQSRIWFK…
PC9H_000298	CDS	scaffold_1	906990	910323	+		hypothetical protein		PF00493;PF07728;PF14551;PF17207	IPR001208;IPR008047;IPR012340;IPR018525;IPR027417;IPR027925;IPR031327;IPR033762;IPR041562	ENOG410PHQM	L:(L) Replication, recombination and repair		GO:0042555;GO:0003677;GO:0003678;GO:0005524;GO:0006270;GO:0006260						MSSPPALDFPSSDMDDVQMGDAQQGQGAAPTPAEGLFLPGTPSTSMGTPARTPMSGFAARRALGMTTPKSKRTPLFAPGTSSPLAYPSSSPSKTPRRAANYGPIDSDPLDFPSSPMRAPAPRNLRGDIHASLSFTPTSSSRRPIRAPPLDPMMSDNPPSDGTMLGLPTSSGLPPLSAPGAPTDEPDEIRAIWGTTVNLSETMKLFRDFLKGFKPKYRLAHDREQGQRTRALASPEEGEIILYEMYLRRMRQTGESNLNLDVTNLLAYPPCRKLHNQLVKYPQEVVPAMDQVLKDLMLELADEDQRAGVEEMQGDHGDEEISEIMTRVYKVRPFGLKPVNMRDLNPSDTDKLVCIKGLVIRTTPIIPDMKVAFFRCMSCHHTIQAEIDRGKITEPARCPR…
PC9H_000299	CDS	scaffold_1	910799	911851	-		hypothetical protein				ENOG410Q39U									MSNFDVPPPDYTSVADEPITAIEDSTTAANTTTIRFNTIHTADTGPVVLSWNPAQSYVEPSAFLTRTTFREIYFSIKYVEARAPTEPVVYTSSPFGHNCMILVPPPESHDTRPQYHITVDADCLNPLVHVTTVKRGANEYGDLVAEFELCYESPWKTTLYATFRPVRRPEVRTHPVIQAQLELN
PC9H_000300	CDS	scaffold_1	912607	914179	-		hypothetical protein		PF00067	IPR001128;IPR002401;IPR017972;IPR036396	ENOG411458H	Q:(Q) Secondary metabolites biosynthesis, transport and catabolism		GO:0020037;GO:0005506;GO:0016705;GO:0055114						MPYGEAFRKHRKFVHSTITKRAITTFQPVQTKNARALALNLLENKNRHEMFFNMFATSVITGILYGHQVVSEDDEYMKLMDHQSMIAVNLGQPGGALLDILPFLQYLPAWFPGTGPAIRAREWRPMFRRVYDYPYEQVEKKMAEGVAGDSILARVLAKFSTRNSVPEEEIEYVKLATGAMYRAAVETTWSTIAVLFMTMILYPECQKRAQEEIDRVIGSERLPEFEDKDSLPYTTALVHEVLRWHPVIPLAIPHRSVQDDVYKGMFIPKGTTILANVMGMALDEKTYKNPSVFNPSRFLPKPNGDDEPLFGSAFGFGRRICPGRHFALNSLWILTATILATLDLSAGRDENGNLAPPPLEFNHTVSRQGCSFFIVKPTDGLLFD
PC9H_000301	CDS	scaffold_1	915390	916688	-		hypothetical protein		PF09949	IPR019236	ENOG410PIZ1	S:(S) Function unknown			SignalP(1-25)					MWFGMRSSTCLSLLLLSTSSLPAHGLPAQQRAIFPSIGPLDDVLLFDAPAFVDGNNLVASVQAFVSLRQINLTPFLSAVQSAIEDAFDLDIGNKVAQVEERLRLFAAIGQSGKDVNVKVGGCSAAASGSGASVGKTSKLPDLGMVLGNVPLGSCAQQNGALTGAVEDKGTIITDARKFENTIFASGPDGFGVISDIDDTVKITNTLDKLGVVKSTLLDDPKPVPGMSSLYASLTKSLATSAPPQFIYVSGSPFQLYPFLRSFISTSFPQSRGPLLLQNLTLIDIPGLLDFANSDGIFEYKTEMIQRIQSFYPAKKWLTVGDSTQKDPETYANAFRNFGPDFIACIWIRRVDGADNSDARFAEAFQGVPQDKFRIFSDEDIPSLESIDVKGGKC
PC9H_000302	CDS	scaffold_1	917516	918796	-		hypothetical protein		PF08231	IPR013260	ENOG410PM31	A:(A) RNA processing and modification								MPPKGSKRTKKTAKAKATEAVPEVTEEQPIPPAEPPQEEAPPAQQEPPVAEHANVPVAPAPEGNTEDVDMGNPEQPEDAVVGAEGEGATTEVESTKEKSTMTMEERKAKLDALRKKMHASSKANRQSLVEESARQKINAREAARLERQRALAETLRTKADAEERGEDIERAKNWEYTIEENDEWEKKLARKKRRADFEFHDDAHAARRRYKKDLDHLKPDLEAYNRQKEIALGLGPGSLITGFNPTQGASSSQLLPTSQQQQLAAENLYRDANTLIYGDNKPTEEAIDRVVGKINRDVDKKSKFSRKRNNEEEGDITYINEHNRVFNKKIARYYDKYTAEIRASFERGTAL
PC9H_000303	CDS	scaffold_1	919732	921586	+		hypothetical protein		PF00010	IPR011598;IPR036638	ENOG410Q0P1	K:(K) Transcription		GO:0046983						MPTSIGSVNPSRRAKQLAPPQRHILSDSDSDAGQDSDQDSDFHPGVDLGRSQSFGHTSGTPHGADRTAITPILPRKGPASSAQAEPAVASAPPPARRGRKPSGLSRSAREAQRKLNHSIIEKARRTKINDALATLRELIPADYGRTHEEDEEDEADQGKKGGKKGKKEEKEFKLEILVRTVSFMKDLLERIRVLEAAQQGARDVDDDVSSAPVPTSEGKKRKRRNEACDDIQDDSRNDDQRRSKKRHVEAYTSDSLAAALPHQLTDLLNGPSSLSAVHPSDPTINSTSHHSRYTRTSRLPSISSWLNTVAPLDSPGVPPISPNTPLANIDPALRALSQRVEEDYSTADPESKKYSAMQAAPHSGSYLPSPPPSTRFYPLSQRAGHNDVPAPLNLGEAYT…
PC9H_000304	CDS	scaffold_1	922006	922341	-		hypothetical protein													MESMIIPKGTTHAILAEVGEEAAGEEKEVFRNLFAAGGPGETNTHALTQIFYHGDGYPVFWAVSISLDKQYIIKILENRIELLFGFKLK
PC9H_000305	CDS	scaffold_1	922951	923736	-		hypothetical protein			IPR011051;IPR014710	ENOG410PYTI	S:(S) Function unknown								MATNDTIDLWDEPETIDIGKGLTMTFLRNSDYLTRVVMTAEHDDFQVPLHYHETHDEIFRVVKGRVRYTLGEPGAKFKAWSRLRATTRFYTPEDGEIVIPRGTAHAVFVEAGEEVIVEEKTTPMDEGKEVFFRNFFAAGGATANPFAIMQIFYHGDGYPVLPAGLRFLEKGLVTILGNYLAPLFGYKLKYDAKKLKKH
PC9H_000306	CDS	scaffold_1	924595	926127	-		hypothetical protein		PF00994	IPR001453;IPR036425	ENOG410QD6N	E:(E) Amino acid transport and metabolism;H:(H) Coenzyme transport and metabolism								MHPAANRLLGFSNHICRTTRSPIAGAAFTTSSKQRLAQFSSMPSLPSSSPSPSTAPPPSVSASDSGPLNNVQANFDVSPMPQNPLGEGRYIRTAAALIIGDEILNGKTHDKNSNYFARYCFEQGIELKRIEVIADDEAEIIEASRRMVRNYDFVITSGGIGPTHDDITYASLAKAFDQPLAHHPECLRRMDEMIRHRPWVATQNEEQREATRRMALFPSQAEVLFIAKDVWVPVVRLEGKLCIFPGIPALFQKMINGLTPFLPLPPLSEKPLRMQIFTSRPESLIAPYLTALQARMKAHGIQVGSYPVLAQGVYVSLIGRDRDKVQDIAKEVETEVGGKIVTEEEVKRRKDDSKQQAKI
PC9H_000307	CDS	scaffold_1	926721	927540	-		hypothetical protein		PF10342	IPR018466	ENOG410PSIT	S:(S) Function unknown			SignalP(1-17)					MFSSALVILALSASALANVFITSPTASTTFTGGKEATISWQDTTDAPSLKDFGLATVSIYAGNAIQQTSLQLIVDNVDVSTTSSIKFTPNPQIGPNSDQYFVRIESRNLKDAAQPQFPALAFSAKFKMDGMTGTFSPAVQAQIAGQSTAPLAGSTPAATGAPAASSAAASTTKSGSSTRAATSTGSAQAATQTDGAIALGSSAKILVAVVVAVAVALC
PC9H_000308	CDS	scaffold_1	928997	930658	-		hypothetical protein	EOG092R0MSR	PF03467	IPR005120;IPR012677;IPR035979;IPR039722	ENOG410PSCQ	A:(A) RNA processing and modification		GO:0003676;GO:0000184						MVTSQPQAKSRRDRDKERKDKTQVQVSAPGDRLKTIVRRLPPNLPEDIFWQSVQAWVTEDTVTWKVYYLGKASKRLNKENVPSRAYIAFKDEETLMTFSREYDGHIFRDKSGNEFQAVVEFAPYQKVPSDRKKVDARLGTIEKDEDYISFIEALEASKKAEPVSLEALIASTQPAPMPTTTPLLEALKAEKSAAKDREAILRNHAHYKEIASRKEDAKKKAAASQAARQDPPHLASETSSGKRGKKGGAPPLKQGPPLTNAQPVKPPQIQTKPPPNTSPAKPPKAFRSRGKQQAPVESNSSTSTPASQSTNNEVSKVPTAGPSQPQAATTSAQPPTAPRRMRLGLASRQFEAALSGVGVSRRRDREDKADSPAGEGPRDGVSDGAQTPIQAAIPLSPRS…
PC9H_000309	CDS	scaffold_1	931630	932578	-		hypothetical protein		PF01814	IPR012312	ENOG410PPKS	S:(S) Function unknown								MQAPYPLIPVPTISQDDWMDKRKTLCWDMSLIHNVFIRSVNTIWNNAPLVTPQDEVSFAGYALTMAAAIHTHHHSEETIVFPFLATKLPMEENIEQHEQFQAGLKEFIAYFQEVFNGKAKYDATKTRELVASFGGALVQHLHDEIPTISPEALSVLDTEGFDKMMHELEEHIKSAPGLFTIFPFTLSNHDYAATPNWPPIPGPLSWFVRHIAVWRHSSYWKFSSFDMAGRPKTYSPGR
PC9H_000310	CDS	scaffold_1	933310	933721	+		hypothetical protein									1 (i106-127o)				MSADNTSVPIIVNTPEELAHPQPSKYQLLHEFLNRLEAQTLAEAMNEKPIRPFFGPRVSYDANSMPFPSQPSWEPQSHDIYLENGIQCGLLQAEAPAKRSEIGCKLLVGSWFAFATLLFLTAIFAGAEGQTIRLFS
PC9H_000311	CDS	scaffold_1	934181	938859	-		hypothetical protein		PF00172	IPR001138;IPR007219;IPR036864	ENOG410Q3MI	K:(K) Transcription		GO:0005634;GO:0008270;GO:0000981;GO:0003677;GO:0006355;GO:0006351						MEIKTKRASQIPPFPPDRHSGQRMSTPVPHQYNHNNIPQVSPTMPPTLMSPTASSSATASAPGSMRSRITVVCAECKRLKLKCDRRTPCGSCQKRDTVSRCIYSPAAAEKVDLHSLNNRLIQVETTLTQMTSGSSAPFVSSYPPASGGAGQALSSADTAKANQPTQPTPGPSNYNKQSSVCYSNIPTSQAPMYHAIFKGDRSALTIPLPIITNTFLSGAFQLHSPSELEQEELLTLQTLGVDLTASSHKGKASTKMNYQTTESFETTGMNAHKGTESVKLEPTLVSLQHHSGTHPDAVSLPLNTPNGPTTTGNNPSSHPFPAPTSHPYNSQPFNSAPEAGGFRVPMDTNAEQERSLLDRNGLPPLSAYLIPSRPSASYEHVFPSSAQTPAPDQSWGPAG…
PC9H_000312	CDS	scaffold_1	942550	944273	-		hypothetical protein		PF01565;PF08031	IPR006094;IPR012951;IPR016166;IPR036318	ENOG410PMRM	S:(S) Function unknown		GO:0050660;GO:0016491;GO:0071949;GO:0055114						MQSVNWETHIFDNGTIYACYSNTALGFPCEQGSIPNIAVDVRSIEDIQAAVKFASSHNSRLVVKNTGHDYLGRSTARGSFLIWTHHLKNITYHEKFVPAGAGPSTSHSNVITLGAGVQWYEAYDAVEAHGRILVGGLSARASVGAAGGWISGGGHSALSPSHGLGVDNALQFTIVVADGRHIAANAHSHPNLFWALRGGGGGTFGVITSVTYQTHPSLPLVGAFFSGNFTSPEIAKGVITEFVRIQPSLAETGWGGYSFFDNSSLNAFYIALNTSWEAANVTWLPFFDFARNASTDSPGPQTLTVPFDSFFSWYQALFSGGQQVGTNVYLGSRLIPTDLVKSDHEKVVKALLAIDGVTSWQYVAIAGGEVSRSKPSSAGINPAWRKAISHVVVSEGWGE…
PC9H_000313	CDS	scaffold_1	944854	946737	-	MTG2	GTPase of the mitochondrial inner membrane that associates with the large ribosomal subunit	EOG092R07XL	PF01018;PF01926	IPR006073;IPR006169;IPR027417;IPR031167;IPR036726	ENOG410PH3Q	S:(S) Function unknown		GO:0005525						MLLSLLRLRTPSLADTTCYTRRLKLALSRSISDASITSDLTAEEKESLREKLHRQRKTEWKRRQGGQSFLDYLIVNVRGGNGGNGCAAFHREKFVPHGPPSGGDGGRGGDVYIIPTPHMTTLSSISKKIRGEAGGHGRGTWQSGKSGSPTIIKVPLGTVVRELGRDHPLRAQDEWEAEEAALEGLPPALKRDKMRENRWVHYPRAAEDNVERDSFKEAEQNMYKVERERRLERRRRAIESPIDLDLSKEIKEDTSIDAPLGTRRQEPTGHLVASGGQGGLGNTHFITAENRSPKFATRGQEGERVTLILELKLLADIGLVGMPNAGKSTLLRALTGGRVKSEVASYAFTTLNPVVGVVRVAEDGTFEGSLQHGAVYGETAVEREHDQARHDLDRQTIAA…
PC9H_000314	CDS	scaffold_1	946827	948935	-		hypothetical protein		PF01565;PF08031	IPR006094;IPR012951;IPR016166;IPR036318	ENOG410XT36	S:(S) Function unknown		GO:0050660;GO:0016491;GO:0071949;GO:0055114	SignalP(1-28)					MSTRQSLAVLAILIAGVSFLWSPQKCRTYPGDPSWPEPHVWDELNKTVDGLLIRSRPVAIACHHPHFDEEQCNEVRKQWHSPQYLEKSSSAIQTPLFANKSCDPFTEPDAPCAIGNYVAYSVKVASPTHVISTVKFAKEHNLRFVVRNTGHDYMGKSTGSQALAVWMGHLRLTEWFDDYEGSNYRGPAVKMQAGVPVEQTYEEANTRGLVVVSGVCPTVGFSGGYIQGGGHGPFGSLYGLAADQTLSMEVITTTGEFVRASPTENSDLFWAMSGGGGGTYGILWTVTVKAFPDIPIAGGRIGFSKSDKISDDTWWEAIDFYQAMTPSFTDIGATSFAFYSNEKFDLPAVFLPNGTSRSIITLLQPFVDKLSSLRIPHKVDYKTYPDFLPAYKELWPSEL…
PC9H_000315	CDS	scaffold_1	949232	949763	+		hypothetical protein		PF04758	IPR006846	ENOG410PRTW	J:(J) Translation, ribosomal structure and biogenesis		GO:0005840;GO:0003735;GO:0006412						MGKVHGSLARAGKVKSQTPKVDKTEKKKTPKGRAKKRILYNRRFVNVTTLPGGKRRMNPNPEK
PC9H_000316	CDS	scaffold_1	950505	950912	-		hypothetical protein													MPRCLTLLLRLCGCAPRIDDELADQQKQAQRNSVPKEHDYDVGTPFEPPRRGGYVEYSKRQRRKTRSMTSNFGSSSAKAGALWTEPVNTEEWLDCDCRSAESKKEIGEEANANAEHC
PC9H_000317	CDS	scaffold_1	951879	952926	-		hypothetical protein	EOG092R0JW1	PF01868	IPR002730;IPR016848;IPR023534;IPR023538;IPR036980	ENOG410PP39	A:(A) RNA processing and modification		GO:0030677;GO:0004540;GO:0003723;GO:0004526;GO:0006396;GO:0008033;GO:0001682						MASTSESRDNVVVDLYKPLPPIRNQKLKLTSKDPYTPMYVQANLTANTDPATIYEQRVKNRQLLLENPVRDSRVKKERLEKKTRKKAEKERIAGVLGKKGARSKGVWRLDESQAKWNLFLPLHHLWQGYMSELLGLASPGTLSANAAPSAASMHPKLLKADFHGSIMTVKQSKNPCLIGLSGIVILESENAFKVITKDNRVKLIPKQNAIFTFAVPLYSVLSPTHSAGVPSPLPVEPENVKTETVLDGPHIELDLYGNQFRFRAADRAGRKFKPKETIEL
PC9H_000318	CDS	scaffold_1	953909	956236	+		hypothetical protein		PF00067	IPR001128;IPR002403;IPR036396	ENOG410PHET	Q:(Q) Secondary metabolites biosynthesis, transport and catabolism		GO:0005506;GO:0016705;GO:0020037;GO:0004497;GO:0055114						MNYLLLGAGLSFVALLRVIYRRYTRISVRHVPGPPPASFLLGHMREFHQRPVGEADFEWQERYGDVVRFNAAFGEDRLLVMDPKALQYIYQTSGYNFPKPGASNELTRIVTGNGILVAELDVHKRHRKVLLPGFGGPESRAFWPIFYNYATQLSSKWKDLISASSNQEVVVDIPRWTSRAMLDAIGEAAFDYQFGALTDAETPLSKAYFGLLSETFGSLPDAAIFTQNLWAYLPSQCLRLISKYTPGMTLKHAQYTEKISLDVAKKLVETKTQELLQGEGNRDIMSLLVKANNSEKDNAKLNEDELFAQMRTIMLAGHDTTANTVSWTLLELAQHPEMQQRLRQEIWDKQLALGREFEYRDLETMPYLQAVVKESLRYHPVAPMTQREAGRDDVLPLSK…
PC9H_000319	CDS	scaffold_1	957435	959769	+		hypothetical protein		PF00067	IPR001128;IPR002403;IPR036396	ENOG410PHET	Q:(Q) Secondary metabolites biosynthesis, transport and catabolism		GO:0005506;GO:0016705;GO:0020037;GO:0004497;GO:0055114						MSYRLLAAGVVLVALLKAIYHRLTRISVRHVPGPPSPSFFIGNMREFHQRPVAEADFEWQAKYGDIVRFKAAFGEDRILVMDPKALQYIYQTSGYNFRKPAEINELSRIIAGNGILSAELDVHKRHRKVLLPGFGAPECRAFWPIFCYHATQLSSKWKDIISTSLNEEAVVDVPRWSSRVMLDAIGEAAFDYRFGAMDDDETPLSKAYSRLVSETFGALPDAAIFTQNLWAYIPSEWLHIISSYTPGMDFTLARHTEKIATDVAKELVEIKTRELLQGGMNRDVMSLLVKANTTENDSAKLDEDELLAQMRTIMLAGHETTANTVNWALLELARHSEIQQRLRHEIWAKQTDLGHEIGVGDLDSMPYLQAVIKETLRYHPVLPVTHRDAGRDDVLPLSK…
PC9H_000320	CDS	scaffold_1	960543	962345	+		hypothetical protein		PF00069;PF07714	IPR000719;IPR008271;IPR011009	ENOG410Q3JI	T:(T) Signal transduction mechanisms		GO:0004672;GO:0005524;GO:0006468						MEFLDCDDYLLQSCFYPNPELCQLLAEKMEEIQRLALGSFADIAYEQKMKSFADEAPAQMMKQHKSPFDSRANVPVARSGKAQLRLRLGDSDDSSTGSSTVGYCEPLPSLAPILYPTQNSKPFNHPGCFMYYHTIASTTSSETIIARETLSPQDGRVVCMKVFRKKYLLERNLVAYPIRELLAYKQLAYAPKHDGDAFVMKLEGCMQDKNRLFFAMQLMQCDLSNVLRGEAPHRPIQAQRWIAQISTGITAIHAAGLIHRDIKPANILLDTRDNVKITDFGSSYIDANGHPVNPNTSYSHHVAGTRGYMAPEMIYCQGPPQKYGLQVDYWSLGCVAFQLEMGSPKSPFPTCKDLDRYLAWDSDLLAGRSYFSYAGMDDDAGTVIAGLLHPDPSHRYNVT…
PC9H_000321	CDS	scaffold_1	964990	967510	-		hypothetical protein				ENOG410Q4E9									MSGLSPARRLRTKTTDFSDFFRGGSSHGSAQPSNILFAQHDANDNHHREPFDVSNIMEASTSSTHSQSAAKKFSSKLPFLGRSRKKSNVEEASANAARERDVGGHETAHDTATHQTHSDSILRPTKSRDGSQQSLSSKFAAHFTPSRPRKSDVSSSRKISSSPSKLRQRAPTETPSTHDRTLHPPPKVSPRGRSFESTSSGASENGIRSTTPRPSQSQQEGQQPTFTVSISPPDDLSRYADLFTRPRRKTDSSSSTPPGRDSDERNTASSSLSTSPRSSLPTGDSEPSGTPDDTPVRPGSRSSVKSAGRQHQKNDSASGTSAILDLRMSEDSVIDKERPFPVPPMMPGTPSERRPSVARISTQNMEKGTITARTGRARSASGSRPNGAPPNIPLPSPPH…
PC9H_000322	CDS	scaffold_1	968702	970601	-	THR4	threonine synthase	EOG092R05ZC	PF00291;PF14821	IPR000634;IPR001926;IPR004450;IPR029144;IPR036052;IPR037158	ENOG410PGKC	E:(E) Amino acid transport and metabolism		GO:0030170;GO:0006520						MRYFSTRGGGDTLSFEEAVLTGLAPNGGLYIPERIPQLPANWRSEWKSYTFQELSVAVLSLFISSEEISQAELKSLVEKSYSTFRHPDVTPLKQLGSATYILELFHGPTYAFKDVALQLLGNLFEFFLLRRNAQKGQGAKPEQLTVVGATSGDTGSAAIYGLRNKANISIFILHPKGRVSPIQEAQMTTVTDANVHNIAVKGTFDDCQDIVKALFADKVFNDAYRLGAVNSINWARILAQTVYYFLAYFHIHSQLTETTDFEIQYVVPTGNFGDILAGYYAKQMGLPMGKLVVATNANDILARFWKSGRYEKIDSTAIVDASDPTTPANGASDGKQTSGGVKETYSPAMDILVSSNFERLLWYLANESAEGSNEKDRRQHACAMVDDWMRKVKQDGRME…
PC9H_000323	CDS	scaffold_1	971218	972747	-		hypothetical protein				ENOG410Q4BZ					1 (o184-207i)				MSLSYFEAVNILNSQETLTDVGDASQKLAKSIAKMIHEFDTVSAHLHTIDMQGLTAPMLPHWTALSQNFRQQIWQFRNNAGLISSRLTMFVSLVLPLATRNLNGGSSHNHQEKLQVLQSFIGVSSDHAAQTRSLTEGMLMLNSNLNAFHSNFARFAASRMTSGQSELQEVAQKIGQLDARVKQLYIGVGRLVGIEIAFLVFSTFRMVMSSGRTGKSKGSRHRLTLTNTDATAVSKEYDNIDRLQNEFAHADHNVQMQLRKTDTVSTSRAAISSLVSNQMVAVQAMLGLCLAIWARLQTDCMEILGWLQGSGHNAFPSVLSAYMEGGHTIYAPLARALDTFTASIDPSLFPGLAQQ
PC9H_000324	CDS	scaffold_1	974578	979231	+		hypothetical protein		PF08514	IPR011989;IPR013721;IPR016024;IPR020839;IPR039662	ENOG410PHYP	D:(D) Cell cycle control, cell division, chromosome partitioning								MAEDSPAPRRSQRERKLAQHFTSVDSALSKGKRKRDDSETEDEGLDERDVHASEDEGDDEDDEPGPKSKRKPRRSKTKSPVKPKGPPPAKKPRAAKQPAPKSDKPATRRGRKPKNATTGAFNAAEVAKDTKISDDNPLFNAIMNPSAALQSTAEDLLQTLTETPGAAQAELVNLILRACGCNDSVDADEALDYDGVVDALDNFTELLKQDNSPVYPLTSKLPIFKKFRKSLSEFLGRLISSSASLGHLYTTDLMPTLQTWVIAMSSSQIRSFRHTATVVALEVETALCEVAAKVEKEAEVIGRQREGEKKRKANNKGTGAKDKQLEGKAAEVRERRTKVAEYLKEFVDGVFVHRYRDLDPNIRAECVHAIGLWFKKFPAHYLDGSYLRYVGWVLSDSTT…
PC9H_000325	CDS	scaffold_1	979898	985503	-		hypothetical protein				ENOG410Q353									MLSSFISYIPKGNKRKTKNLNHHGRVPTLAIGPSGSARGGEYSAYAASAPWDYSGAYSQTYRSPILDIHDQRRTRDGQQRVSEEEFLQAPPPASPRLDLDIPSSHLQLSGLLPPELAKGDSIALLIDEELSNDARATGERPWVDDMDVAERYEQRRSGQGYPAAHEQESAEDSPSASSASSDGVPIPPRQPFLEDEEDEDSIYSLEYVNFDPDAPPSPQRTKAEPTEGEEESILPYASVSRRPAPAPIKIPNLALYGPKVQLLPGSSGYQSRPQSRGNESIISTEPSSAVSGTSLARALFANTFVLSGNQTSRYRSGVSMNLTRQDSATLPRGEHPLMSSPFFRDRPEQIGSPILIPAGTGVSLPPPSSYRPSTAESMHRHRVPRRSVPDRPMTAPSSK…
PC9H_000326	CDS	scaffold_1	986918	988840	+	FOL1	trifunctional dihydropteroate synthetase	EOG092R02PP	PF00809;PF01288	IPR000489;IPR000550;IPR006390;IPR011005;IPR035907	ENOG410PFZP	H:(H) Coenzyme transport and metabolism		GO:0003848;GO:0004156;GO:0042558;GO:0044237;GO:0009396						MLADSSASTLIENPRQFTDSWNHVVALAIGSNIGDSCRNIEYALRLLEDPSSHLQSGETGAPNVPPHLVVTDTSFMYQSAPMYVTDQPPFFNCACIVETNVRPLALLRVLKGIEETVGRVPSIRNGPRAIDLDIILYDDSVLDTRPLAERTTLDNLHGQLVVPHPRLCEREFVLRPLFDMIPDYIHPVQRKTIRALLEFLPLSDPPMERVIPFPKYPSSGDTSNKMLSGVPSTSTRWTYPIPTQPAPSNPKPRKTHVMATLNTTPDSFSDGSDHTAPLSAIAYVESSVAAGASIIDIGGYSTKPGAAFVSPEEETSRVVPAVEQIRGHPDASARQVLISVDTFRPEVAKAAVSAGANCINDVHAFSGPNSYPLNLANENMTQMIEVAKDLAVPVVLMHS…
PC9H_000327	CDS	scaffold_1	988995	990173	+		hypothetical protein	EOG092R0K4F	PF13432	IPR011990;IPR013026;IPR039856	ENOG410PQNR	S:(S) Function unknown		GO:0005515						MSVAASLQKLANFRIHNTRASQETLNEGSVILKSGGAGKLGDDAWAFLEQLALAAIDVGRLDVADKCLEQLIAKFPGSPRVEILAGIRMEVSEAPATVLQYYDELLENDSANGAAWKRKIAIFRRVGQIDKAVAELSQFLDTFYSDVEGWLELADIYSTCSQYTLALQALSHVLLLAAQNPFYTLQFAETAYTANDLPLALKTALVVIDMCEQDEIQRVPEGILIRAWWTIKLCSKRLLAGSSVSASHTDIPKHLNLIDELATERVLQAYSAAEMEKRDGKDAAGRGLVSNWMTAV
PC9H_000328	CDS	scaffold_1	990531	992118	+	PPX1	Exopolyphosphatase		PF01368;PF02833	IPR001667;IPR004097;IPR038222;IPR038763	ENOG410PK2W	F:(F) Nucleotide transport and metabolism		GO:0005737;GO:0016462						MSRNPLKRLSMALKFSTNGNAAVSSSNPPPTIPETHTLSEFLTSAKTNYLRDIKDASVGGGEWTVSMGNEAGDLDSLASSIAFAWLTATTKFTEKSVPLIQTAKDDFKLREENLYAFLLAGITNPLESLVSITDIGNDARFPSHKFALVDHNRLGERFTTENPSAEVVAVVDHHEDEGLYKGTAEPRIIGKAGSCASHVGLLLRSADNVPAELATLLLCAILIDTGGLKANGKALPVDYEAATALIPMSTYASEVDPTSYSGDKLAEAPAIKTLTAALSSKKEDVSLLSAYDLLRRDYKEYSYPLQWAPDQPTIKVGLSTVPTGVASWATKGKLLEASEQWMKLRGLTVLGVLTSFRDEKKFTKSGRGKHRREQIWIIRGDANVVGIDALAERLWEGLK…
PC9H_000329	CDS	scaffold_1	992419	994757	-		hypothetical protein		PF00067	IPR001128;IPR002403;IPR036396	ENOG410PHET	Q:(Q) Secondary metabolites biosynthesis, transport and catabolism		GO:0005506;GO:0016705;GO:0020037;GO:0004497;GO:0055114						MNYLLLVVGFALVALLRAVYRRYNRISIRHVPGPPSDSFFLGNMREFHRRPVAEADFKWQEEYGNIVRFKAAFGEDRLLVMDPKALQYIYQTAGYNFPKPRERREMSRIISGNGILSAELNDHKRHRKVLLPGFGGPESRAFWPIFYGYAAQLTSKWKDIISNSPNQEVVVDIPRWTSRAMLDAIGEAAFDYQFGAMENAETPLSVAAKTFGSLTDSAIFMQNLWAYLPPQCLHFISYYSPGFTLKHARSTEKIATDVARKLVQTKTEELRHGTENRDIMSLLVKANNSENEGAKLTEDELYAQMRTIMLAGHETTANSTSWTLLELARHPEMQKRLREEIWAKQQALGREFEARDLESMPYLQAVVKESLRYHPVVPLTQREAGRDDALPLSKPITLT…
PC9H_000330	CDS	scaffold_1	997533	998824	-		hypothetical protein		PF00230	IPR000425;IPR022357;IPR023271	ENOG410PIJX	G:(G) Carbohydrate transport and metabolism		GO:0016020;GO:0015267;GO:0055085		4 (i149-169o202-222i234-258o286-311i)				MTRSKTSSPTHWEITSDTASVLDRGSHEPKESVSYQENKPHVRTSGKSPRFPSRWWKYRQWLREPMAEFAGTMILVIFGNSVDCQVVLSTNPGVAASPKGDYLSLTFGWAVGTAMGVYVSGGISGGHINPAVTLALATWRGFPWKKVPVYIFAQLMGGVVGAAITYANYFHAIDIFEGGPGIRTIKTASLFSTYAADYMTNVSAFFDEFLGTAVLMLVVLAMTDKQNTPPPPGLAPLVLFMLVLGIGVALGVQTGYAINPARDLGPRILTSMVGYGKAVYTFRNQYWLWCPVLGPFIGAQIAAFFYDLFLFNGEEGLFNRK
PC9H_000331	CDS	scaffold_1	1000248	1002063	-		hypothetical protein		PF00069;PF07714	IPR000719;IPR008271;IPR011009	ENOG410Q34G	T:(T) Signal transduction mechanisms		GO:0004672;GO:0005524;GO:0006468						MSPQTPTSVQVPPVLGGYHLYQLLESNAPTHIYLATDYETGIDVALKVEHHLKATSRSAIQYEQKIYSHLPAKSEGIPQFFSGGSLGGWEYIGVELLGPSVATLLAESGRSSLELHSVCCLGMQLIDRLALLHDHGILHRDIKPENCVIGLTPGTEQTIYLTNFGCGKYIRHPLRFMNDGDLQMGFFTYIIPPFVTTLAYTYRDDFEALALTLIHLIKPYGLPWARRGMLRQEDRLGQQLLSTAKANTAMEGLCSNIPTIFKDFLLYCRSMKVNEYPDYQQWRDRLSEPIVEKGYEAASPFYWPPLPLPSSPRASRHHSPVFISPQETHHLSLSPIPLHLPTLPAHSPQDDFHELLLGGHATKAALIKILRFDILPFANSNRKLADVVLQFCDVLQFHR…
PC9H_000332	CDS	scaffold_1	1002274	1002745	-	URM1	Ubiquitin- modifier 1		PF02597;PF09138	IPR012675;IPR015221;IPR016155	ENOG410PR1E	O:(O) Posttranslational modification, protein turnover, chaperones		GO:0005737;GO:0034227						MASSVSLKIEFGGGLELLFANQSSHKLTLPKFVPISNSTSLSSLSSSNLKDTDTESATSDDAAIPDGLKRVDVTYLLHHLRDHLLKERPELFMDKETVRPGILVLINDTDWELEGEGEYELKSGDELVFISTLHGG
PC9H_000333	tRNA	scaffold_1	1002945	1003037	+		tRNA-Ala
PC9H_000334	CDS	scaffold_1	1003188	1004829	+		hypothetical protein													MTQKLPPLPTEVWLQIASYIPEREMPSLYPLSRAFYELGMDAIYQELRIRAFTKGMVSRIQNASKKPFISRRVLALDIHLDAFDALVASRAQSSLGLFASLFYRPQGPHDVTRMSAPEVSSILLNSVKYMTSLRRCRLRIPSSHHIYTYLPFIRALWEGVRGRVDDLALEVPGNVLNVALPVSVDSLLQVHALSLVLCDKLDGWGSSYASQLIANFFNQAAPGLESLSLVSSPATPKPLLIGLLVDQFHNLRKVHLDIQFDDITGYNIAQFLNVHGQHVHTLSLTARISPNSDTTPLATLRLPALSKLSLNFDLETTQFNRFWASGFLTFTSLTHLRIDAPALAHDRFSLICDAFGRRITSHQVHDVHFNLQVLNGLAFDRLAMSFAALRTLSITANSL…
PC9H_000335	tRNA	scaffold_1	1005051	1005140	+		tRNA-Ala
PC9H_000336	tRNA	scaffold_1	1005916	1006010	+		tRNA-Ala
PC9H_000337	CDS	scaffold_1	1006335	1007778	-		hypothetical protein	EOG092R0JWL		IPR013920	ENOG410PQVH					8 (i21-45o65-88i100-121o127-148i168-186o206-224i229-244o250- 273i)				MMNELPIDMNNPHVREYLLLIRLQVLTPLSLLINIGSVLTCSLVADPSIRGIFRLYPAPISPKAVVIGAYVLLIYAAQIGYCVLLTAARKPETKQAMIKGVGFTLILSNVLMAVWAITWILQLFLASTILLALIALLLLYSNLTLLVYHPPTSARPLDVALIHAPMRFFLILPLGIMFEYSLFVYLGYTYTPTAPGIPADYAQYQLPGFLAVALTNLFSSVVIATRRDIVWCIAAVWICVSLWSERPKGAAVYITALVFTAIHPLALIAGFIYKRFVKTGRVALVPEDDALYRAARVPDSTSQPNAHIDRSTAATNGQVNGANAQQGPREVDPEELWG
PC9H_000338	tRNA	scaffold_1	1007958	1008048	-		tRNA-Ala
PC9H_000339	CDS	scaffold_1	1009033	1009369	-		hypothetical protein													MVWISNRSSETIKVVVTSPGGDPGTYEITPEPLLVESWRQNYWTRKTPETATVTFEKRGVQFQTAVNPTDVLLVYNDTYIVQPSTKVEFY
PC9H_000340	CDS	scaffold_1	1011128	1011456	+		hypothetical protein													MVWVSNRSSQTIKVTITNTTGGDGSTFDVVPEPLLVETWGQNHWSRGGAETATVVFEKSGTQFQTALNALDVLLVYSDTYIVQSSTKQQNI
PC9H_000341	CDS	scaffold_1	1019607	1020231	-		hypothetical protein				ENOG410PY7U					2 (o20-43i55-75o)				MTNWNSPDVIASNGVSFSRLVHAFVGLYIWEWFLFLDVDWMYVKIIKRYPLSPMMFYFMNRYCLLAALISVVIALNVESEINCQPLYAFMNASQYYRLNANLSAYEDFSYLVT
PC9H_000342	CDS	scaffold_1	1021107	1021473	+		hypothetical protein		PF05347	IPR008011	ENOG410PU2G	A:(A) RNA processing and modification								MLKTSNSFSSYNFRNYFVRKTKDTFRSIQNESDPSKIQALYKEAVDDLAVLKRSALVNQVYGGWKLAIERQSEDPAVARERSDS
PC9H_000343	CDS	scaffold_1	1021667	1022199	-	RCF1	Respiratory supercomplex factor 1, mitochondrial		PF04588	IPR007667	ENOG410PR45	M:(M) Cell wall/membrane/envelope biogenesis				2 (o26-45i57-78o)				MDAPPRSFIQETYREKALRKFNENPWVPLGVVATCGALITAMVKMRQGDSRSFNRWLRVRVIAQGLTVAAMVGGTYTLGSKNRQSVKEIEEQERLKRAEEKREEDRKAFEERLKEAEEAYEVEKAFEEKRHGAQGSEQSRSWSSWFGGGSKGGSS
PC9H_000344	CDS	scaffold_1	1022777	1024494	+		hypothetical protein				ENOG410PY7U					7 (o39-61i73-91o111-129i141-162o182-199i211-233o239-259i)				MTDWQSDSKISRNEGRLSLFVTETRRSIDRGTSASLSRLVHVFIGIFIWECVIFLSMDWRYARHMKRERPQMILGFLNRYFLLAGLIGLIVDDTVTTTVGSLTADPYTSLQLQLCTSIAIELASTGLTLRILAVWGRMVPVTVFFCVCLLVQASLFLEAPIVGCVITNTGNLTPTLGYTFNTPYFLILFASAGWVYFFPCKKVPLCNRISLSELCWFGAAFLASLVNTVFIRLNLNRVMAIIAVVPSTVVISIASGRVIRLWAESHRAFVRPETTEQRSTATQCSAYKQTRFSLLKRWLSHLGSPTREALDSPDFRRLSSPSSSHGSTVQARDSTRQSSITLPSLNSPSSTYIPNRASQNPSTRLDSDSETSAMGDRYDLDAQLVATERRNFAGTIGIS…
PC9H_000345	CDS	scaffold_1	1024699	1027057	-		hypothetical protein		PF00067	IPR001128;IPR002401;IPR017972;IPR036396	ENOG410PKHF	Q:(Q) Secondary metabolites biosynthesis, transport and catabolism		GO:0020037;GO:0005506;GO:0016705;GO:0055114		1 (o12-31i)				MLTHIIKTLASFVFSRGVLALCFTAASLHVVRWYQLRKKMPPGPLGLPFIGNSHQVPAVKPWRKFQAWNEHYGPVVSLFLGSTPVVVLGTPQAAWDLLDKRSDIYSSRPRFIMGGEILSDNKRGLMLPYGEEWRKWRKILHSGFHARKSDEYQPIQSLESKIMMHQILTEPKGYERHIQRYAASVVTSVTYGKRIDSVDEWVVRENMRAMDCALHLYSIPGKYIVESMPWLLNLPLCLQWFRKAPEAQRQRDVKFLMHLYDEVKTRMDEGTIADCLTSQTISISEKNGWDVLDVAYAVSSPFGAGIETTAGTLSVFFLAMLHYPETMKKAQQEIDSVIGPERMPEFEHKDSLPYVNALINETLRWRPVAALGGSPHAVTSDDEYRGMYIPKGSTVFANL…
PC9H_000346	CDS	scaffold_1	1027453	1029572	-	BPL1	biotin holocarboxylase synthetase		PF03099;PF09825	IPR004143;IPR004408;IPR019197;IPR029062	ENOG410PI1A	H:(H) Coenzyme transport and metabolism		GO:0004077;GO:0006464						MNVLVYSGPEVVQASLSGALAALRTILQPNYSVQSISLQTFLSQPWYTSCALLVLPECRRPFQSKSTSAIQAFVENGGAFLGLSTGAKFSTSPLDSDITNMTAGSGSTDPLLRFRQMMKGGYLYPTYSRESSDLARSSVTVLAQDGAQARLVQTSRKEFVAVDQMEGGKALATYAGEEAAASFIHELGKGKVVLWGPGLEYPLSSLAPTVDVSAEEHRRGELLRATLSSLSLQVPSAELPRISRPLPQFLMGPPSKPGIVLKILRPLALGYPGSEPSVLKDTNDTFFFHPIEDSNQVFQQAVAELEHVEDPANWQPKHIIVCPDGVLPPSELTPLFDCAAFFNALSAAQDKDGLPAQGEPWRMGEAFAYSKAVTSTQTMLDKNPHFLTSLPAPFVSMAS…
PC9H_000347	CDS	scaffold_1	1029705	1030543	+		hypothetical protein		PF16015		ENOG410Q44G					3 (o48-67i74-95o101-128i)				MAPERSHSDDLSSYFDRSATAVREYADVFEHQYARPAMKLGGVYHDQHPILSVFLVILFCLSIVPVVTFIGFSIFAAVSFIIIALSVALGAFVLLELIFVSVLLCVLGAVLFMSAFLTGATISTYLFFRLAVLVRNEGRAGLNEWILEAKSRYYVAEPAQDPLEDDDYAYDDDEPQDVQGGHISSAESTNEALTPKDELNPTQDPIKEEY
PC9H_000348	CDS	scaffold_1	1031046	1031963	+		hypothetical protein		PF00734	IPR000254;IPR035971	ENOG410PQ55			GO:0005576;GO:0030248;GO:0005975	SignalP(1-20)					MLRTSTLIAAGLALASGVSAVVPVWGQCGGIGFGGETVCDSGLVCTKLNDYYSQCLQGTAPPASTTAAPGSSVPPTPPSSTSTAVGGSTTLAPGYSFIRAVVDPNFHKYLRSEIAWTASEAVLGEPSEAAQFQVTNGQLVQNANGTPLYAVVEPRADSTVMKLKVSWSATPATSGAFVFSGDTLEWSNPSITRPQNNAWLVCPDADGNRDLYVNLGPYSYMTPAGCADQTIHAYTGSTATA
PC9H_000349	CDS	scaffold_1	1032259	1033697	-		hypothetical protein			IPR008972	ENOG410QDDT				SignalP(1-17)	1 (n4-12c17/18o358-375i)				MPSFLALALGALPAVFAATFDVSVGAGGQLAYDPPFVNAAPGDVVNFVFHPKNHTVTQSSFDTPCVALDGGKRSGFMPVAAETDGLPTFQFQVVDTTPAWFYCGQTGHCGQGMVFAVNPPAEPSPRSFTAFRDLAIATNGTASSSAAASSTASSSAATDGYVTPPAPHFETVTVTVTLPSSTYTTVYNSYDGTPPPTPAPQPQDHKITVGADGQLVYSPANIQAAIGDTVTFEFRPKNHTVTQSNFNNPCQPLFDTTGKVGFSSGFMPVSPDATQFPTFQIKINDTAPIWGYCGQTGHCGSGMVFAINAVESGPNNFVAFQGLAKRINGTSSSSSSAPAPTSSANQNNQNSAAGARASFGYASSLVLAMVALVSLW
PC9H_000350	CDS	scaffold_1	1035269	1036208	-		hypothetical protein				ENOG410PHDJ	Q:(Q) Secondary metabolites biosynthesis, transport and catabolism								MESLPAEIWMTIFSYACTDDGSTGRSISLVSRWFWDTSRSIKHQSLVVKGVSQITGIASMLERLPPELRRVRYLSVRVHHRDINKRSVSVEDGVILRGDRDAREPECGVSARTQSGIYDRSMVVLSHMLQMIAPQLRVLHLWLPISSPSRLLPSTLPSIVELRLTSNDMRGQHLDTRSICTAPQRYPSLRRLRLGMLHHQHGLFGRIAKLAPGITHLHFCIPEHTHLYRELERALGVGDTSMDVEKENLLPETIQRVSVQMGPTPNAGKYPAWASMHKTMRLNLERVAREDKRVVLVRLRSEGTSLSSYPEI
PC9H_000351	CDS	scaffold_1	1036557	1039854	-		hypothetical protein		PF02170;PF02171;PF08699;PF16486;PF16488	IPR003100;IPR003165;IPR012337;IPR014811;IPR032472;IPR032474;IPR036085;IPR036397	ENOG410PISF	J:(J) Translation, ribosomal structure and biogenesis		GO:0003676;GO:0005515						MSGRGDRGRGRGGFDRGRGSPGGGRGRGGPTDSPRGRGGGFGDRGGGRGGFGDRGGGRGSPGGFDRGGRGSPGGRGRGFGGGSASGGVFAPNEPANVDQRLLDGSQEALVASFKQLTLKPNDLPSRPGFGTIGKAIKLRTNFFPVETSDRPVFEYDVAITPAAGTAARRVKRRIFQLAEATPAWQHYGLRGTVAHDSSAKLIASTQLPQPLAITVPYYDEDESAPRPGGKEYTLTIKFIQELELQSLMNHLAGDLQYRDYDWGPVVAALNLILATHPSSTGGIVVGRNRFFFRGAMHPEPLGGALEAWRGFYSSVRPAHNQLMVNVNACTTAFYQAINLADAMTQFRNASFGANVGNFVRTVRVQTKHLGHRKTVKKLSNKTARTHSFDCEDLGGRVTV…
PC9H_000352	CDS	scaffold_1	1040151	1040478	-		hypothetical protein		PF08546	IPR008927;IPR013328;IPR013752	ENOG410PPXN	H:(H) Coenzyme transport and metabolism		GO:0016491;GO:0055114						MGFPDSPDGLPSSTAETVFEALARLNRDPDNSHVPSMLLDARRSQPMEVEVIVGEVVRMGKKYKVDMPHIDMLYALLLVKQNQILGRMMAQ
PC9H_000353	CDS	scaffold_1	1040528	1041515	-		hypothetical protein		PF02558	IPR013332	ENOG410PPXN	H:(H) Coenzyme transport and metabolism								MPGSRTAFLDNEDSLILERSGIVRVTAVARSNYGIVRDQGVHFKTKKFGEIRDWKPDRLCNTVASAADQAYDYVVVTTKAVPELRLTPEILSPLLSPEYTNKFAQPTYLLLQNGLNVEKDLYNAIRKLNQGKPSIVCAALYVGTNLAAPNVVVTNDLESLFLGIYRHEDHTTSANSADETALLQDLGSIFQRGGSAITIVPEIQRVKFAKNFWNLSFATFATLTGYTVPSLFRSPPASKDEQCNPYLYPITAELVQQHSIPAIKTTMKELLTLGMRR
PC9H_000354	CDS	scaffold_1	1042720	1044166	-		hypothetical protein		PF02558;PF08546	IPR008927;IPR013328;IPR013332;IPR013752	ENOG410PPXN	H:(H) Coenzyme transport and metabolism		GO:0016491;GO:0055114						MKEVLLVGFGAVGALYSLVFKRSGLARVTAVARSNYNQGVHFKSQKFGEIRDWKPDRLCSSVASAADQAYDYVVVTTKAVPELKRTPEILSPLLSPEYTNRFSQPTYILLQNGLNVERDLYDAILKLDKGKPSIIGTALYVGTNITGSNVVEHNNVERLSLGIYRHGDPTTTENSACEAALLQDLGSILQKGGSATTIVPEIQRIKFSKNFWNLSFASFATLTGYTLPSLFRSPPASNGEQYDPYVHPITAELVQQHSLPAIKAIMKEVLALGHAMGFPDSPDGLPSSTVETIFENTAGLHRFPDSSHVPSMLLDARRSQPMEVEVIVGEVVRMGKKYKVDMPHIDMLYALLLVKQNQILGRIAAREQ
PC9H_000355	CDS	scaffold_1	1044261	1046197	-	SDH1_1	succinate dehydrogenase flavoprotein subunit		PF00890;PF02910	IPR003953;IPR011281;IPR014006;IPR015939;IPR027477;IPR036188;IPR037099	ENOG410PFY0	C:(C) Energy production and conversion		GO:0016627;GO:0050660;GO:0016491;GO:0022900;GO:0055114;GO:0006099						MCREAPNTIIELEHYGVPFSRTSDGRIYQRAIGGHTLDYGKGGQAYRCAAAADRTGHALLHTLYGQSLRHDTTFFIEYFVLDLLMHEGACVGVMAISMEDGTIHKFRSHHTILATGGYGRAYFSCTSAHTCTGDGNAMVSRAGLPLQDMEFVQFHPTGIYGAGCLISEGCRGEGGYLLNSEGERFMERYAPTARDLASRDVVARSMSKEIQADRGVGPLKDHIHLQLSHLPPEIIEERLPGISETAAIFSGVDVTKEPIPVTPTVHYNMGGIPTKYTGEVITIDERGNDVVVPGLYAAGEAACVSVHGANRLGANSLLEIIVFGRACAHHINDNFSPSTPHATLPSDLGNTSIEFMERIRRVTKPESTSAIRLEAQRIMQSDAGVFRTQDSLDKGVERM…
PC9H_000356	CDS	scaffold_1	1047067	1049045	-		hypothetical protein		PF11710	IPR023041	ENOG410PS88	S:(S) Function unknown				7 (o13-38i81-100o123-145i157-181o214-234i286-305o311-334i)				MESSTHFNFGVRLGLFLVVEAASLSAISTGCLLLYILYGSINRWRASRAASHEHTKEHSEDTISVDQESQDVSGSAYFRNLMLAELIQAIGGLLNVRWIIDAEVAFKGPICTAQSVLEQMGDVGVALTTLVIASHTFIVLVLRWHTPARISIKSLSIPVPAIVLSLIWLFITLAIAIPAGLHQNNPDKPYFSRTGYWCWINESYPKERIGLEYFWLWAAAFIQIILYVFLALVLRGLVVVENGRFGWASKSKSSEQHDDYSYDSDGAREARDEAARVANRTAMQMLFYPLVYIITIFPISIARWVSFSGTAIPSAATMFADIMFCSSGFLNVLLYTITRPGVVRGSPQAPPPSDAERGLKSHSHNPTLQASSHSGHGAISGGHVERRRVITAKASAGVI…
PC9H_000357	CDS	scaffold_1	1050002	1052114	+		hypothetical protein		PF01546;PF07687	IPR002933;IPR011650;IPR017144;IPR017439;IPR036264	ENOG410PJ40	E:(E) Amino acid transport and metabolism		GO:0016787			M20D			MAASVWTTNEAEGNYEIHFAKATETIFRPDILKSLEKTIADMDNELRELSLDIHAHPELGFEERYAHDTMTAFMEKHGFEITRNLHLDTAWKAVFAHGQGGRTIGINSEMDALPNIGHACGHNLIGMSGIAVACALKGALQQWDIPGKIVLLGTPAEEGGGGKIILLDKGAYEGMDICLMCHPAPGPKGSLSLSSCLALNRVSVDFFGHTAHAALSPWEAQNALDAAVLSYNNIAALRQQIKPTHRVHGIIEGKEWVPGIIPDKSKLYYYIRAPTTTEVEALTKRVLPCFEAAALATGCRAEIKITASTNDLRQNEALGEEAGNIIKAGGGAVDYEWGIKSASTDFGNVTYALPSLHPGFAIPTELNGGNHTHAFAKAASTVAAHKACLDVSIALAGVG…
PC9H_000358	CDS	scaffold_1	1052433	1055360	-		hypothetical protein		PF00732;PF05199	IPR000172;IPR007867;IPR012132;IPR036188	ENOG410PFGF	E:(E) Amino acid transport and metabolism		GO:0050660;GO:0016614;GO:0055114	SignalP(1-17)			AA3_2;AA3;AA3_3		MMWGKLIFFTTFAIVQAARPHGLTNDAAAFASQSFDFLIVGGGTAGLTIATRLSEVSSVTVGVIEAGQSFPDEPLVNTPFLFGRVLGNSSFDWNFASVPQTRLGNRVVGFPRGKMLGGSSGVNFMVFGRGSSDEYNAWASLGNPGWDWNGLMSYFKKSETVSPGDANVLPGASTAPGLNTNFAGNNGPLKIGFNTKETLLLPDLAAKFATSFTSVGAFVNPDPDSGNATGIFQSPRSVDPKGVRSYSASAYFSQAQSRSNLLVLTGAEATKILLTKYGNNLVATGVTFTSGGKSLTAKANKEVILSTGSIKTPQLLELSGIGQKALLTKLKIPVLQDLPGVGENFQDHMLISQDFLLKEPAPFTWDQVVNNATFNDEQLALYAKTGSGIYAASGGIFSF…
PC9H_000359	CDS	scaffold_1	1056219	1059362	+		hypothetical protein		PF13086;PF13087;PF13245	IPR003593;IPR027417;IPR041677;IPR041679	ENOG410PFJA	L:(L) Replication, recombination and repair								MSSESDIHAFVDKYKTLLLEERNEEIERSSLSLSNCGPKLLELKGLALGGLGVVEMNIGLGGKTLVELERPLAHHTTPSFPPHTFRPGDLARIEANASSNASTKKPKKATAPSDAKAVEGVVYKVSDTRIVIAVDQSDASDDIDLPQVCRVLKLANSVTYDRMSKALETLEKTATDPKYSANRTRLTEVLLGITQPSKPLPLPGITFFDESLNESQKTAVRFTLEAPEVACIHGPPGTGKTHTLIEIIRQLTSVSPANPKPQRLLVCGASNLSVDNILERLLALPAVDKGEKLKVTRVGHPARVMAHQGVLETTLDAKAGRSEQAALAKDIKNEIDAAMGVLTGKGKGVKGKGPRGAERKKLWEEVKALRKEYRQREGGVVKSVLGESQVVLATCHSSG…
PC9H_000360	CDS	scaffold_1	1059512	1062313	-		hypothetical protein			IPR027417	ENOG410PNC4	S:(S) Function unknown								MPLSPTSHGNTNSRALRNQPAQYTTARRPTSRHSSASAPKNILPSLHWLFRSNIPRHRNSYIPAGVDIHKRNFFGMGEILSVITNPAETVRSLTESKRLLEEARREIEENRERAQIRPKHTFSRLPGFFPRKAEMTAIERALAGEPSFTVVFGASSVGKTTLLREVLSNPKYHVLHFDLRIAGFADLGSLYQSLSQQMEQYFEEIAKQMEGYEDFEKEAWSFKHDRLNVEKRTMDLQNGNGSNGKVKTSDIARLMELFQSSLLKYWEFKPETSQDDHSKSRHGANTRRKNSQETTSSQTRVGTPNDASRNNVGKKSRWNFFRSGRFKRCSSHKTKSAATENTREVPEKEEERTIPDKKIPVIFFDEAHKLPALIQSSDTMKCLLDSMLVLTKQDRLCHV…
PC9H_000361	CDS	scaffold_1	1062765	1071846	-		hypothetical protein								SignalP(1-15)					MLKFVLVAGLVGTWAAPVKDGLVPRQDGSSLEDDILGLSNLDEDPNLWSAFYCEGANYVGQCITQQYSSGECTPIEPPLCENVLSFLATSSNYRGDDCTGSAIPIYSSAQDLHAFRKTNSYRCGLSNAQVAAQLATTPTTPAAHSRASAPRLSLTSTETATVASAQSFKETSIVDAHESLHAAAVTSTVEVVPPPSESSSSRMDGTPSTATARTVTSSVSIPSISSTDRHRHHRHPKYVTVTETATRVVDAYIAPTETAAPSSVTNNPSYAETREAAPSPTRATNTEIAATFTPSHRHHHRLPKHVTVTETATRTLDAYIMPSATLSEQTLDKVSVAPGVPATSTLADAQPLPLVSSSVGPPALEASETSHAPTAPSSTSLIPSVHHVADAAVPTVSLP…
PC9H_000362	CDS	scaffold_1	1072353	1074547	-		hypothetical protein				ENOG410PSET	O:(O) Posttranslational modification, protein turnover, chaperones								MTQPIPSSSSRKRALSDAPAQNDSRPKKKRVDGGADAATMHSSTASSRDKKKRRKKKRRLSITAHGEEASVVAETAQSSTSRTSPAAAHASSESTPDSGRYANSRRTFIHGRRQLPLSAKVKGKRKAALGSTSQPPQLVTTDTTVEEEEKAKDATMSEPGRSTQVATDGSAAIIAQLGRELEESKKLLSVHKNTLASLTNSLTCQICVDLMHKPYLLTPDGGGNTVPPGLDIPLPGTAEPNPSQTNPLPPRRLDYIRRPKTCPHCRARILSRPVEVYGVKAMVNTLAHSGLVSGFSASPDDDGNVNRSEANTLGDGASSSPNLRTNKDPWAGIFPPVHSVHGGGLLSALADLPFYNGGRWPRPHVTLVNGTTNEGNQRGAPSVPLETLDTHGFHDREDG…
PC9H_000363	CDS	scaffold_1	1074791	1077790	-		hypothetical protein		PF00172;PF04082	IPR001138;IPR007219;IPR017896;IPR036864	ENOG410PIUC	S:(S) Function unknown		GO:0005634;GO:0003677;GO:0008270;GO:0000981;GO:0006351;GO:0006355		1 (o564-582i)				MSAAHPYRRSQHGESSSSSSQAQHDPSAQDMQDLLRPTASTKESKRLRGEIACAECRRLKIKCDRKVPCTTCMKRGCAALCPNSTIPPGDGSRFVLAATEHLRQKMAAMEARMHALEDALAIAQSSESSQPHPLLTVPFEDEVEDEPSLLQPMNSEETAQASNQFGMLHMDPVDYGSARFFGPSGGSEQPRPVLQELDPSYLPDEINQLCQGFPFTPPGMQTQVVIDMIETFLPPIERAIELTDTFLEHLSWMFHIVSRQLIVGELIPTIYKLNHNTYGPHDLALMLITLGIGALVDLNLPPYNLEAQHYYRLACAALGLQPVLSQQSIVTIKTLHLISIYNGMSGKESNLEQSYMMLSLAGRLALGVNVDPSSWGFQGREAYDRRVYFWNLLAAILWQ…
PC9H_000364	CDS	scaffold_1	1080131	1080936	-		hypothetical protein		PF00011	IPR002068;IPR008978	ENOG410Q48A	O:(O) Posttranslational modification, protein turnover, chaperones								MITPANTSSTRKVARSPSNNIMNNEYQFRSLDRTLAMRYMQALREGRIRGETPLNLPKLATLTYRPRMDLFDVSSSPVVAAVLELPGLKKQDINLRVEQGQLVVSGERCMHVPAVLQETSGGSVKAEPGGEQGTSNHSSVYHTPTQELKYGKYIRVIPLPVGTMPSQINATLGEGLLTVTWPRGSGTAASDVASDMNISLHSAPKSTVDNHEEAALTRATSMMHMDAN
PC9H_000365	CDS	scaffold_1	1081535	1082615	-		hypothetical protein	EOG092R0NL8		IPR003140;IPR029058	ENOG410PQ09	I:(I) Lipid transport and metabolism		GO:0016787						MAFVEETIHVSVKDTSSPLSDKVRKPPPEESAIPVPFSYTPSDDGIDENLLIFLHGLGDTHKPFSKLGRQLKLPQTATLSIRAPEKIPFLYEEAYQWYTSFDGFGELIERPDPTPAMSLISAVIKHFVRDCEWTMNRIHLFGFGQGGSVAVQYAIHHWNDLLLQQQTADLKLAVNVPTSSNTNTPSGPSVDTRKGSPVAIISSNSLASVVSVSGPLLSYPTLSQKCPTPVAISYRLPPAEEALTQSQLTEFKKAFTRVEEVKLSDKRGGMPASRGEWEGIMKFWSDVLERRRGEGLFEVMSGTPK
PC9H_000366	CDS	scaffold_1	1083167	1085828	-	DRP1	UAA transporter			IPR004853	ENOG410PMPN	G:(G) Carbohydrate transport and metabolism				10 (i85-105o117-135i265-288o294-312i319-337o343-366i706- 724o744-764i771-792o798-815i)				MATDTKMRTRPPRPLKHVRVSSLRSFHKEPYPPTSPSSDVDPRSLGGLLPSPSTSSPTRRHASGSSAFVPPTETNTTGGVSSASVTAMLVPLFCYFSLNLLLTLYNKIVLVRFPFPYTLTAFHALAGTLGANLLVHYPSLALRVSQIPRRPIPSLPPFFARYTWRLRRLWFRMSDRFGGVREHRPLTAPASAPGLESYRLGESEVADSFYMSTHSGMQSHPGSSPTHRQPFSERSTDTHPSVGPSHVPREVLKPSSFDLTPKETLVIVAFSVLYTINIVVSNMSLGLVTVPFHQVVRSSAPFFTIALSAGVLGQHASKAKIISLIPVIAGVGFATYGDYYFTPWGFALTLLGTLLAALKTVITHFIQSSGRFTRSSAPKHDEKTLPSPARSVVVGAIHT…
PC9H_000367	CDS	scaffold_1	1090683	1091778	+		hypothetical protein		PF07986;PF16752	IPR012945;IPR016098;IPR017901;IPR027684;IPR031925	ENOG410PK6J	O:(O) Posttranslational modification, protein turnover, chaperones		GO:0015631;GO:0000902;GO:0007023						MSEDTAKWQIAHSFAEGFNATFSDLESRISVAAAMEPSSSEIIQGLAAEVAALSRRLSDVLGTLPSYDQRQHEQRVKTLEQSLEKLRAAQPKSKFTFKRKANGSGKPPSSHKPSELPRPEAPSSSNLILSSHHDAYLGWHNIPTPMAGSSSDATIRDLTNCIVNLASQTTDGVQITALHIHNLKNCLLLLPDITGSVMLHDLNRCSIVVGCHQFRMHTSKDVDVFVSISSSPIVEGCSRIRFCRRPDPNSRQLQSEPLMVQDFSHIRPTPSPNWSLLPAGSTPPTSLPDSDMGPDEVATLLDVTLPPGI
PC9H_000368	CDS	scaffold_1	1091983	1092632	+	RBX1	RING-box protein 1	EOG092R0OY2	PF12678;PF12861	IPR001841;IPR013083;IPR024766	ENOG410PNSJ	D:(D) Cell cycle control, cell division, chromosome partitioning		GO:0008270						MADMDVDQTVVTTKKEGKAKEGKQRFEVKKWNAVALWAWDIVVDNCAICRNHIMDLCIDCQANQVSATSEECNAAWGICNHAFHFHCISRWLKTRNVCPLDNREWELQKYGR
PC9H_000369	CDS	scaffold_1	1093006	1104779	-		hypothetical protein				ENOG410PSZB	T:(T) Signal transduction mechanisms				1 (o2699-2721i)				MTSNSSAPWSPTYGTTDYTSVTPTDTLMSPSRYSYSDAPTQSTDSEDASPRRAMRRITVSPSPSSEDSNGAPYHYEEENSFDDADEVAATLNTLEDDINETEDLWTRTTSSTATPSSFSGTYSGSYTPTSSSLAPLPPAGTFPRAGHIQDPQIRLSIISERTEPSRPTSGAYSTTQYARPNAPTPDAHRRSGVSSHTRSSTDPNADRELPPPGRAIELIARFETNSPGGGHLRTTSAPGGPRSPSPYMSASQSTPHLPSTAGYNYTSSYGYGSSYGYGSRSSSPSKSSSSISSSASEERISNTLSTLATQRAVTSTSGDTRFLTTDTGSQTPTGSRTGTGYLSPSAYTNTFTNTGSQTPTRTGTGYLSPSAYTGTFTNTGYMGTYTGSDTFTGTGTTPT…
PC9H_000370	CDS	scaffold_1	1105969	1106701	+		hypothetical protein				ENOG410Q3NT									MTMGKRKQIPTELHSELSEYSSLLRALRTSHTLDLSSQLTQRQSSPQSGSTSQEDLDELIALDDADRSQDDLRAEADAHTLNAMTADSSYHAARSSASQSQGKKKSDTWMRWPLLEGDVLVPEWGFEDEIKLLGLHVLRSHYGQDATSDEDDWDEEFESSAWSSSLAQVSSLHLSRILGLLATHTPIGNKSMQNRINPVGWEMVINALGAYGSDFIDETSVLQSRMSIYLPSLNLFNLKFAEL
PC9H_000371	CDS	scaffold_1	1107525	1110353	-	GAP1_1	glyceraldehyde-3-phosphate dehydrogenase 1		PF00616;PF03836	IPR000593;IPR001936;IPR008936;IPR023152	ENOG410PGAJ	T:(T) Signal transduction mechanisms		GO:0005515;GO:0043087;GO:0007165						MTPAQSPKWQSVGRSGSRTKARSSGGRYSVNALYSMAAEQDTDVDDDLAKAQKRLRDLKNKISVQSKKNFVLERDVRYLDSRIGLLIQNRMASDEQREVERTFEEVDPTAGHYPDERRLAQYSNLFFLLQSEPRHIASLCRLVTLSEIDTLLQTVMFTLYGNQYDSREEHLLLTMFQSVLSTQFETATDFGSLIRTNTPVSRMMTNYTRRGPGKGYLKEALSECINSLIEHKDLDLEINPVKVYEQMISQVEEDDGSLPDHLPRGVTPEVAAENAEVQAIIAPRLALLMEIANSFLMAIIDCLDSVPYGIRWICKQIRSLARRKYPDATDFAICSLIGGFFFLRFVNPAIVTPHAHMLVEENPSKHPRRTLTLIAKMLQNLANKPTYAKEAFMMSLNPF…
PC9H_000372	CDS	scaffold_1	1115875	1121123	+	SNF5	SWI/SNF chromatin-remodeling complex subunit		PF04855	IPR006939	ENOG410PHVG	B:(B) Chromatin structure and dynamics;K:(K) Transcription		GO:0000228;GO:0006338						MNPAMMASYGGGGNKFGYGGGGVNPSQLMGGMGMEGMGMGGMGMGNMNGLGAMSGMGGMNNVNGMGVGGMGGMGMNGGHQNAQMLQQQGFGNMNGSGMGNVGGMGMGMDGMNAMGNMGMGGMGGGMGGMGMATINPAALGGNAASANMSGMNPMGGMGNMGGMGMGMGGMNQGMNPNATGMSHGMNMGMNMGMNANMGSMGGMSTPNATSNHPNNANMNGGIAMNPIPNSHHSNPAGGSSLNMGANSHNQSMNNMNMNAQLNMNMMQLLQNMGLTKQQFMQLPPQDKQMIQAKVMSATQAQQMQMRNQGQGGQQHSQPGQIQIGQGMNAQVGQGQVQQMQDGHIHQPVPAGDGIPSLSHPRSASAASGAGGQFYDRPSSSASMHSQAQPTSNGGSGMGS…
PC9H_000373	CDS	scaffold_1	1121640	1122550	-		hypothetical protein				ENOG410PTXA									MSRLLAVPRVVLRPKYLHQKGFAPALTSFSWQPERSLHAFRRAAPPERCHTCQRTLRIPEPQRTRLLSSAPSTSKIFSDPDRSDLFYHLIQPPNPVSSSNPVYAVSFISTELSLLDSKAVMGWVPAGIEGEVSLIGFQENASFKEILHEAIRKGLQEGVDDIQINGALQTHSGWMHVHDDRNIPALGRIGDPDDIIASVLVEDGKILAETYQPMPAYRLYTADGITRLTPGLDKKLREVLMEATRQH
PC9H_000374	CDS	scaffold_1	1122716	1124561	+		hypothetical protein	EOG092R0DZ6	PF08624	IPR013933	ENOG410PFQS	S:(S) Function unknown								MKSSTKIIIKARPAAPETPVASSSKPRIVIPAMGASSRDRESSKSTPETEIPDEDADEGVEGDNEDEEQGDGDDDAEVKDGEDEQMEVDTPVVRRPRGRPRGRGRGASTGTPRARGRGRGRGRGRPRGRPSALTIRLPKRQDEDGDASGVDSEVLQDDAIDSNVDADDAKVAPMGGGKPFRKIGDKVYIIEGDEFVTEDDPVGDTKIDKNGRLLGGRQFKGSTFVLPNRHPERLYMLAIDAARTSGFRDSLYYFRRNLLAFKLNATQPEKEYLIKEGKLGSHLKTRSVTLITARSAFKLHGSKMILDGKWVVDDYYESKALEDAAARGAKAGDPVGDLTDPQGNTESNNAAAKAAAKADRDRGGGGGMGIYRAGGPTTIFGGNGLGPYSDGPLNAVRKS…
PC9H_000375	CDS	scaffold_1	1124675	1126246	+		hypothetical protein		PF12937	IPR001810;IPR032675;IPR036047	ENOG410Q4H0			GO:0005515						MSNPSVAQHALSLRDVLLEIFLYLTRGEIASNARVCKVWQSLALGEVWRNASIVGLVALLAPLTRKEPDIMVFSHAIHASDWARFDKYAWRVRCICFDATPCKYGDSVFSQIAHARPRLNLLPNLTEIKLCGSHPLSVVTLFGHASVKTLAITSTAIDGLSELDEQSITESSAMLSYLPTQMPNLRNFRVEASRDQSLFFLVGPLTLALRSLSFLEELYLPATLITNDMVISLSLLPYLRCIEMMPSINPAPLDSLPSNGFPSLKIFGARASIAQAALWFFKPGFAKDLTSLSFSSPYMASYSSTESYRDLAAMIASNFKLLVHLSLSPAISPFTLLPFDVLEPILSLSTLQTLRIMNQDTIEVKQDDLVKIFKSLPNLTLLSFQLDPHYLPKFSIATL…
PC9H_000376	CDS	scaffold_1	1126827	1129056	-		hypothetical protein		PF00732;PF05199	IPR000172;IPR007867;IPR012132;IPR036188	ENOG410PHJA	E:(E) Amino acid transport and metabolism		GO:0050660;GO:0016614;GO:0055114				AA3_2;AA3;AA3_3		MFFAGGRILTTSNDLRDEYDFVVVGGGTAGNVVASRLSENLGISVLIIEAGGLNDVLESQVPYMWTRLLGSTYDWNYTSVPQAALGDRSISLARGRILGGTSSINTMLYTRGTSDDYDSIAELVGDERWSWDSLQPFIEKNELWSPPSSNRPTDGEFDPSVHGRHGVVEASLPSDLQPIDDRVLQTTRENSEFPFNLDLNSGHHLGIGWLQSTITSTGRRASSATSYLGSGVINRPNLDVLLDAQVTRLLLSNATEEVKFDGVEFVGGALQSVKAAREIILSAGSIGTPNILLHSGIGDAGDLAPVGIQSIHQLPSVGRNFTDHILAGLTWFANSTDTFEKVGRNPSLQAILLEEWKTSGTGLFSGSGIDHLGYVRLANNASIFDSVADPAGPNTGHIE…
PC9H_000377	CDS	scaffold_1	1130245	1132954	-	THS1	threonyl-tRNA synthetase	EOG092R02P9	PF00587;PF02824;PF03129;PF07973	IPR002314;IPR002320;IPR004095;IPR004154;IPR006195;IPR012675;IPR012676;IPR012947;IPR018163;IPR033728;IPR036621	ENOG410PFEM	J:(J) Translation, ribosomal structure and biogenesis		GO:0005737;GO:0005524;GO:0004829;GO:0004812;GO:0000166;GO:0006435;GO:0043039;GO:0006418						MATPVASSSAPAETPALQGPHPGQEKPKGKDKKAKDVATAAHPLELNPPPAFFDHRLKIFEKLKAEYDEFVKAQPREEIIVTMPDGSERKGQSWETSPMDIAKEVSKSLSERVVIAKVDGDLWDLERPLEKSCSLQLLDFEHPEGKRVFWHSSAHVLGEAAERHYGCHLCIGPPTDDGFFYEMAIEDRAVSSADYPALEKVSELAVKQKQKFERLVVPKETLLEMFAYNKYKKHLIESKIPDGTSTTVYRCGPMVDLCVGPHIPHTGKIKAFMVTKNSASYFLGDANNDSLQRIYGISFPDKKQLTDYKAFLAEAAKRDHRKIGKEQELFFFNDHSPGSAFFLPHGTRIYNALVDLMRTEYFKRGYQEVISPNMFSSKLWETSGHWQNYKDDMFTLDIE…
PC9H_000378	CDS	scaffold_1	1133345	1134477	-		hypothetical protein		PF14304;PF14327	IPR025742;IPR026896;IPR038192	ENOG410PMBW	A:(A) RNA processing and modification		GO:0031124						MSAVRNLNNTDVGGRPLRIDLADSDPFLEGKTTVRGEIVDGGMPGPSENRWRSDDRRGDDRNRRDPNAFLSGLPTGVAVPPGQTSLDVISNVLANMAPNSLVEVLAQMKAFVINHPDQARALLVAHPQLAYALFQALVLNNIVDPAILQRMLSATTSGSAAPPPPQAPSAPAVPPHVPHMPPPPHLPNFPPQHQPYAAPQMPPASTPRYPPPPPMPVPPPSAMFAHQPPLQQPAPQISPYYRPPPPAPSATPPARAPQVPALPDMDEAQKNMLLQVLSMTQEQINALPPTERNAIQQLRSQLGGGIPT
PC9H_000379	CDS	scaffold_1	1135509	1141355	-	VPS15	Serine/threonine-protein kinase		PF00069;PF00400	IPR000719;IPR001680;IPR011009;IPR011989;IPR016024;IPR017986;IPR019775;IPR020472;IPR021133;IPR036322	ENOG410PI6P	T:(T) Signal transduction mechanisms		GO:0004672;GO:0005524;GO:0005515;GO:0006468						MGNVHSGTNLTRTAGALDSFVAELGGDIIYDKSLGAPRFLKTVKCRHRNGPLVVKIFIKPDPGISLRNYTRRLKVEREALAEIPNVYNYQVFAENDRAGYIIRQWIASNLYDRISTRPFLTSVEKKWIAFQLLTALRDARNRKTSHGDIKSENILVTSWNWVYLTDFASYKPTYLPLDDPSDFSFFFDTSGRRTCYIAPERFYTAADNPEISAKKSRLAIDDSEGKRDGKVTEAMDCFSAGCVIAELFLEGAALFTLSQLFKYREGEYNVDPHLSNIEEEGVRDIIKQMINLDPSARPTFDTLLHNSRGTVFPECFYSFLHNYVSSINELPPVQTVPPSVVGTPNPNAPPSSISSNTSFNRAGTTADPPTANSSSHAALPNDSDRRIERIWADYESIEP…
PC9H_000380	CDS	scaffold_1	1141795	1143355	-		hypothetical protein			IPR000757;IPR013320	ENOG410Q37U	G:(G) Carbohydrate transport and metabolism		GO:0004553;GO:0005975	SignalP(1-17)					MKSPLAVLALLPIQCLAQYSLMRDYSGSGFFDAWNFFGNADNLTSGDSFYLDRSAAASQKLAFVNDAGNAVIRVDNFTNVALNEKRNSIRVESKDLYDVGSLWIIDAVHIPFGCSVWPAFWSKGDNWPFGGEIDIIEGINRLSRNQIALHTVRGCTKFDAPGEQIGQTLGKDCSIGAGCVTAESKPNSYGQAFADNGGGVFATQFDTSGVYVWYWPRSAIPASIRSASKTNMTLADWGLPTAAYPSNSCDIPKFFTAQRLVLNIALCGVWAGVPNIYKSTCGDGICYNDNVVGPGSPRYDNAYFEIPYIRTYTATAAAANAPTSTSTSTIIVTQSATLASDAQNSPTLANSQSAATADPQPGGVAASSASRLYTPHLHAALLHLLAFCVAFF
PC9H_000381	CDS	scaffold_1	1143722	1145789	+		hypothetical protein		PF07000		ENOG410PPJE	S:(S) Function unknown								MANDTAHPELHALRQTLKDICSLVSEFRPMTPRPPIIDTSLDFEPTEESHWLQPEQIPGIRKLRDAIQMDLEALEKFLQSPESKHLPALSTNAPYLISVWNELLCAPTPVTAVMKTFQPTASGGSNRKPGVRQKQNPVKVDVVADNGRRWIRVNTIKNSRLLAEFREIDSYVTSSEDESDDDAAKPSLAQNELDNSVLRMGRSLLDAAKANPLGGSNTLPRITMRLTRLALSPTADTDPRIAQTVRLLEAMDIEVEFGEQTDVKLPRPRPEDPISFKPTPFINLDLSILIALVSDLTHSHLPSNVDEADERFIPTQSYREWKQERKKFLQTKGQNGDDPTGSSSGESKHSRALANQLVQEMYKGLFQEMHEQLLNPPRPRGDLQFWTTPEARDRCIRII…
PC9H_000382	CDS	scaffold_1	1145930	1147540	+		hypothetical protein			IPR032675										MTVAKLPDELWVNIIGWVPDDVVRQLLGVNRLFSRRALRAKYRSITVNSHATRRACDRLQHIRDSGYAQYVRCLDIDLTFLSREEPYVLPWMAPKTSSPVHASVAVTRDIRKLLLYIVENAEDLTDCCFRWQSGLEFHHQADFLQALWPLLRDSMRNLSLLMTPVYFDTLVQNARNLRALQHLRLDFRFPPSSWVLAEGGIDNFPQFMDSVKDHIRSLDLSWLEYPYSAASMSKGTPALPHLEHLEELALQVAEPSSLEIPQVARFLECHSGQITELDYEVRTTDHLTNLFAHTSFVALTELSLRTVDFLPQIVNLLRTTFFPLDRLEKLAISGYFMPADEVLIASAAFTLNPLSYSNSLLRSLHLHVNTITPPFLDTLSTRYPSLKLLSLHCVLGESN…
PC9H_000383	CDS	scaffold_1	1150473	1152729	+		hypothetical protein		PF00732;PF05199	IPR000172;IPR007867;IPR012132;IPR036188	ENOG410PHJA	E:(E) Amino acid transport and metabolism		GO:0016614;GO:0050660;GO:0055114	SignalP(1-23)			AA3_2;AA3;AA3_3		MLYLQGTFLQLLALISCLSFSRARLLPTSKDLRDKYDFIVVGGGTGGNVVANRLSEDPSVSVLVIEAGGSNDVLESQVPFLWTRLIGSTHDWNYTSAPQTTLGGRSISLPRGRILGGSSSINGMLYSRGTSDDYDSIAELVGDPLWSWDRLQPYIKKNELWSPPSSNRPTEGEFDPSVHGRHGLVAISLPSILQPIDDRVLQTTRENSEFPFNLDVNSGHHLGIGWLQSTVTSAGKRASSATSYLSPGVINRSNLDVLLDAQVTRLLVSNATDDITFNTVEFVAGTGFPQSVKATREIVLSAGSIGTPNILLHSGIGDPTYLARVGIKSTHNLPSVGQNLTDHIIAVLPWFANSTETFETVGRNTSLQAILLEQWKANGTGLFSGSGIDHLGYVRLADN…
PC9H_000384	CDS	scaffold_1	1154754	1159090	+		hypothetical protein		PF00732;PF05199;PF12697	IPR000073;IPR000172;IPR007867;IPR029058;IPR036188	ENOG410PHJA	E:(E) Amino acid transport and metabolism		GO:0050660;GO:0016614;GO:0055114			S33	AA3_2;AA3;AA3_3;AA3_1		MICWQGIFVHILTVLSFTGARFLSSSNELNQQYDFIVVGGGTAGNVLANRLSQDEGTSVLLIEAGGQNDALELEVPYLWPGLLGSAYDWNSTSTPQAALDGRTIGISRGFVLGGTSSINAMLYTRGSSDNYNNIATLVGDEGWSWNSLQPYIHEDATQIDTISVTPPQYIQPIDDRVIETTAVNSEFPYNAAPNAGDQVGMGWSESTIDTNGRRISSATAYLTPAVVNRPNLDILLHSQVTRLLSTDPTDATKFTAVEFVESVNRVPGAARAVSATKEIILSAGTFGTPPILLHSGVGDAADLTPFGITPVHQLPSVGKNLTDHLLIGTAWFANSTDTYETVKRNATLQAELLEQWQQTGTGAYVNAGIDHVGCIRIAPDSSIFQTVPDPAGPNTGHFE…
PC9H_000385	CDS	scaffold_1	1159265	1159677	-		hypothetical protein			IPR006311					SignalP(1-23)					MSFTRRQLMITLSVTVLANVAGAVTVCARSIRPYAEAASFWHDICGITVSDPNTVLMATNLEFFDPSFECDTNAGFVQAQCVSFNSCGGATDCDHETPT
PC9H_000386	CDS	scaffold_1	1160666	1163330	-		hypothetical protein				ENOG410Q31X					1 (i21-41o)				MPTGFQASVERRESQGATPKIWIPVVVVAVTLSAIAILIWARRSSAVRQGFSTILSRSSTNNTSSRPGTAREVTAEQLAGSTANAANATTANATTANGNTTTTGTGARPRRTRRPRRTPSQVSTTSLPAYMKEPGEQELVIYRGPEDMEDAPIAHTNIVMPLVDEDANESQHSHSRDHSYPPAPDSPNDMPLLADGQDDVDDHDASPDLLRAPPGEGMPTRPSTDTLNASSETGIVSDMVPTATADPRGEAPPYFEVIDLNDDSQRNLIDVRPELAASPPSNPSTSPEPPSTGGSGASSAPRRSTFRSLWQTISASTSASGAPQSASGSPAQSPPGTGAGSTHARAESGLSNTSSSISNAYSPPTSPVPRTSTSRISHRPTPSGSSSILAPFRTLSRQR…
PC9H_000387	tRNA	scaffold_1	1163873	1163968	-		tRNA-Gln
PC9H_000388	CDS	scaffold_1	1164797	1165509	+	RPL20	60S ribosomal protein L20		PF01775	IPR021138;IPR023573;IPR028877	ENOG410PJYU	J:(J) Translation, ribosomal structure and biogenesis		GO:0005840;GO:0003735;GO:0006412						MGLQEFQVVGRHLPTESDPTPKIYRMRIFAPNEVVAKSRFWYFLRQLKKVKKASGEIIGVNVIHEKKPLKVKNFGIWLRYDSRSGTHNMYKEFRDLSRADAVKSLYQDMAARHRARFRSIHILRVVEIEKTEDIRRPYIKQLLTPGLKFPLPHRVSKARSTFVAHRPSTF
PC9H_000389	CDS	scaffold_1	1166987	1169948	+		hypothetical protein			IPR029045	ENOG410Q11X				SignalP(1-23)					MSGSWLHAISLLTCVGYASFAAAAAPPAADPCAKIAGKSFILPTDALACQKAFPFNETLRQNVLSNIAGVFDFFTFEDYYLKSPPPFQESTVDIRATLARLNRTRFATDYDFNWAVYQFTTQLNDGHTHIFTFLLQGWFPNCYTNFQNIIPTPLVSLEENGVQSIFVAPDAVEFSNLIGTEFTGFFDSIGFDWKRLAGAKVIQIEDQDPYDYADFVAKTVSGNYLDHGVRVNSAFSSYRISGNAFSQRIGDMAGPTGSVQTSLKLKLIPVNSTRAETVSVPFLTNFLGSPFTDKASFWANNCAATDSTNGIDFKGASFSPPPRRLPRADIIDKGESSAVGLPHEFEPTLPPVNGSTGVIKSFILPDSKTGVMFVGSFGGDFNGFQHDVVAAVTQFKAAG…
PC9H_000390	CDS	scaffold_1	1171402	1172437	+		hypothetical protein													MTTSTKSLSVDTACPPFGQMASRIYASQILPFRHLPVQTVRPLPPTPTSAESRSEIPSSPISSKPLPTLPHSPISMPDISIIPATPLPSSPSSPKTFLSTGGNSIEAAMVSAPITLNSQRARHVPLRVCTAPEVLQRHSLSNSSSLTPTHSPVSTSPAPVSPLASDIPQPPSPTTARRRRLNKLQRHLGESIPPELVHSPSGRGRSLSITLGVSLDSSDSGGDLVFERSENLRAKDAGTDKVYDEFGSLSRFWRKCTQTSNQRIDVTRLVESDATDDEDDTSLGSGRGSDEYQWVVSRASKVEVAGTEARRAAHRYSKRWVREQGGRRWEEHDYNDVLKLLRKL
PC9H_000391	CDS	scaffold_1	1172884	1180384	+	SET1	histone methyltransferase set1		PF00076;PF00856	IPR000504;IPR001214;IPR001810;IPR003616;IPR012677;IPR024657;IPR035979;IPR036047	ENOG410PH74	B:(B) Chromatin structure and dynamics;K:(K) Transcription		GO:0005515;GO:0003676						MSEAHCLDSIDEDILILIFSRLGVPDLLSVRQACQRINKITRLRIVWYNACVFNILRPGYPFPDVPLDDLTEFDLERYTRLAHRLSIRWTSRSSLGSQYRAQSPAVFDSFPLTRERSFKASTSTEITAVRFLHGRKERYMLAVSKGIWSTLSLWRIDGPGGKKSQNAVAPHECTKWSPKGALFSKFVLNKDVKSEGVVALSVFMAGQQNRRQTIVLTLEGIETAGSDIEFKVLSTIDTTLEPMEMRGHIIAFADESSQTVLFNRRTGLSGLLQHEQEQGVFLHDPCVQVVFAYHSVLVVRARSLHLFPWPELLAPDVIQPTQSIGHHTFGWVDGISAVLPAQKFNEHSNNTLGNIPIMILSRTPSHDPWSSDVCTLDLYKLEPNPAFIPPTTNDAAPGF…
PC9H_000392	CDS	scaffold_1	1198364	1199428	-		hypothetical protein		PF00642	IPR000571;IPR036855	ENOG410Q3H6	S:(S) Function unknown		GO:0046872						MSSIRTTTARGPAGRIIPINCRQFLRGHCTYGETCKFLHPSDSRVSETSRTPSNEGKVARDRLLQQPNLGTDLVYEPIAWVTVPCRFFISRGGWCPLAGQCHFIHDLSLPAEDVRVSSRSSVVSFAVDRARAHCWAYVRGNCHDPNCPHLHPRDIQAYMKYTPCAWWPACQDASRCPFKHPKPMSRSGCSLGPELTGMSLASVTGARQQGRRPPGSVLTSDLDHYIGGRVVSPLPAEDSPFDYYDSAVAASIFRHPDILDENMRPSPNVFKESHHPLAPFSLHESIKETKARRFSVAVTSLGDHHHHRDGSHSLAG
PC9H_000393	CDS	scaffold_1	1200692	1202375	-		hypothetical protein				ENOG410Q359									MTLSAQDDLPWPELGNVSRGATRGNQGQKGVLGSPDRDGRCQLQLRVQPGVLAVRLNRQASEWYRTLDNEVNRALKLTKTYWRKARRRQDYDARADQDHMELHEWLQQLKDKTMSHLELLMQKGDIQGPPYVMPDDVELSFLRGFIERHKAGVPHNPRLRNGERPTQIRASSVDSMSPEPESAFVPPPQKYRSSGPMECASEASSSHVPHSSPRGSKSPSLLGVDTLTQEASTSKQVLQAARASLTRSSKDTQDAFLRYTACLDVERQARQAVVSAEKRRDDIMAALLVRTQQQGHHSTSRSRHSSASDDEDGRSPPRYSKVDEPRPSSADSTTSRPRPVSWPESDPQQNAYANEAAYIEDPSAKASRKHSRSWDRGNQFPDGQYACEDITALPPRKRV…
PC9H_000394	CDS	scaffold_1	1202867	1205176	-		hypothetical protein		PF00171	IPR015590;IPR016161;IPR016162;IPR016163;IPR029510	ENOG410PMP6	C:(C) Energy production and conversion		GO:0016491;GO:0016620;GO:0055114						MILARHTVLALRGARPVGRGLSTRASDILTSLGISSTTEVSGVYDGKWGGSGELMQSVCPTTGEVLARVKTATPQELHEALEKTREAYVFFRNIPAPRRGELLRQIREALGAKREELGALVSLEMGKIRTEGVGEVQEFVDICDYAVGLSRMMNGRVVASERPGHSILEVPNPLGVVAVLSAFNFPVAVYGWNLALSMAAGNATIWKPSPTTPLCSIAVTRIVSGVLERNGIPGAVAGLVTGGKDVGSAVVESKDVDLVSFTGSEHVGRIVGKTVMSRFGKVILELGGNNASVIMPDADLNLAVPAVFFGAVGTAGQRCTSTRRLYLHRQIADEFMGRLKKLYASVVPGDPLDSATLLGPMHTKDAVGIYHNAIKHLKEIDAEIVTGGKSYEQSPLDAG…
PC9H_000395	CDS	scaffold_1	1206389	1208177	-	JIP5	WD repeat-containing protein jip5		PF00400	IPR001680;IPR015943;IPR017986;IPR036322	ENOG410Q0YD	S:(S) Function unknown		GO:0005515						MSLDISLPDHPFDLVFHSEKAVVFTCLLSGRVLAYAYDDYGNSKKLWSSRPFKKSCRCLDITLDGRTIWCGGKGKALAAIDTTSGQVTDKRVGSHNASINRIKVLTDHLFATGDDDGVIKIWDQRKNESIRSYNHHFDYITDFLWLNSKKQLVTTSGDGTLSVIDVRSKQTKPVAQSEDQEDELLSIIPIIGETKFVVGTQLGILSIFNRSAGWGDCVDRSVDTLLALPAPFRNNKGSAILTGSSDGFIRAVEILPTKLLGVVADHGDFPVEKMALGRGGGQPLGDSVPARSGLSTTSGDSDGPEVERSHGTPTEHWWLGSIGYDDSLKLTDLGRFFAEIDGKQAEELMGTSAPMGDDDGNAREEESPEVHTPMDEKVSNEDGNSDHSSGEEFASAPKK…
PC9H_000396	CDS	scaffold_1	1208901	1212936	-	IRE1	bifunctional endoribonuclease/protein kinase ire1		PF00069;PF06479;PF07714	IPR000719;IPR008271;IPR010513;IPR011009;IPR018997;IPR038357	ENOG410PFXN	T:(T) Signal transduction mechanisms		GO:0004672;GO:0005524;GO:0004540;GO:0006468;GO:0006397	SignalP(1-20)	1 (n2-13c20/21o595-614i)				MAFLLPPSLMALIDASLAYANTDNNALATARFSHAGYFHPPRAATANPDARAAEHDQFDLLDIVLVAGVDGKFHAFNRSSGQAVWSMTSQPASNSTVSSLAPLIRTANPNDSLEQDEDYYQEMYVIEPQSGEIFVLPSPSAPLQQFPYTMQQLVDMSPFSFHGESERRFFIGKKETSLLALELETGRVRQIDGECPWDPDPWKQSETEVDLDELEDLDSAGNTQPQVTEVLIGRTDYHISIHAHPSPSSPHHRPKPIQKLTFSTYGPNNQDHALQASYRRPKDDRYIQSMPGGEIISLRLKAEDGETQAGSAGWGHKFTEPIVAVFDILRRQDSDSAFALLQPRPRLADVLAFHNFASPSSTAGSSRDGLPQALLDALPNLNSAFVGAIRESGSLYAMS…
PC9H_000397	CDS	scaffold_1	1214223	1216351	+		hypothetical protein		PF00067	IPR001128;IPR036396	ENOG410PJG6	Q:(Q) Secondary metabolites biosynthesis, transport and catabolism		GO:0020037;GO:0005506;GO:0016705;GO:0055114						MLQDFVFVALAFLLALTGYYRWGKPSLPVPPGPKGYPIIGNLLDVPSEQLWVKFLEWSKEYKSDIIYFRVFGSSTIVLNSLKAANDLLSVRSMLYSDRPIRTMVDELLGWGSLISNLTYGHAWRIRRRAFWQEFNPARSVNHRPRQLWYSHDLLRRLLKDPDNFLHHIHYSLAASIISATYGLDVLPENDPNIERAEKALDNFKHAAIAGLYLVDVLPFLKYVPSWMPGAGFKRFAEKSRPDTMDMLNAPFVEGCNRIREGKNEPSLLSRSLAKGGHSIEDHPDAKLIKDVTGVAYVGGAETTKAALSTFIAAMLLYPEVQKKAQQEVDSFNRSRLPLFEDLPNMPYVHAIMLEVLRICPGRFFAIDSLWLNIASILTVFDITKAKDEEEREIEPDIQW…
PC9H_000398	CDS	scaffold_1	1217914	1224091	-		hypothetical protein			IPR007577;IPR012878;IPR029044	ENOG410PSND	S:(S) Function unknown				2 (o71-89i772-789o)				MAFASSQRHLTNGLPSHSFGNQEKHHRHSAPWTKPVSLAIPGVHTRRLRILVPNTGKLSHLGAGRLGRRRGPLLMCFIALSIFGVYFIVSRRYEGREWMEQWPSQSGDPSTLVFQRQDLQRIWKWEIASGHYPSRASIPKHIGLKEPPHNPAIPPKLRVVPPSRYRPPTTAVAADTDIDTLGTGPKRVYLDIQSKPPDVAYPPRPVPGSIADMDVVMKHCDFSTGKYVRDCLEVLRLGGGLDNGRRVRRGKMDDWKYIFLEQEGPVAQLAEDLDQQPIPIARPASPNVQRERDPNAGLNKKPNTEWESSIALQAVVPSASPAAKNDACDPNNPRVFHMFWTGPFTDKPYLALMSYLFSQNAGIHLLANETGPSVCRPQFWLWINPGPAASVPNPSAVHD…
PC9H_000399	CDS	scaffold_1	1224859	1225585	+		hypothetical protein													MFNLVRRISRSFIPRPDRPWEEDPTSNAPQIGRKRRLSTTELGDGPSDEERLTKRGRGALPPVAVETTTENTSQNDTREASPVSPPHGATTDQEDVKEVTEGVKEVELEDKKEVGPESVPLPVEVSGELDEVSATPAEGSKDESKAEAENDDVASSRSSSVPPQPAEAVDLALAEQPSQVTDERTNEPSNEIPNNILVTSAEIVSPQPAEGS
PC9H_000400	CDS	scaffold_1	1226380	1228381	+		hypothetical protein				ENOG410Q43R					2 (o483-502i631-653o)				MFAYLAQRFSGGKSSEDGGRGRLAWDHGSPHSPPSQGWAKVGLRPRAPSQPGDISTTRLPLANPSTEEKLGTFRRVQPTGSPTRLFPPNVSWLSDDDRDTPRPPSPHISNYASSDHAPQRHLSPIYDHPDAYPNMLSPSTSTSTISPAPSTPRWGLRLQTDPALVGSTPSLNMYTRQTSLEDPQGVPFAQVKQLSPIAEQDYLSPTSLRTHTRPPSDHDASHSQNNRSPNESQHSDITSTYISFESPTAINTTLTSTEPSPVFAPFISRPLNRTLSQNSSRTHISTTSTIVKNPSPSVVIPPLDLRPPFPGPHPSNSYNASVPSLRPLKSATTPTMPTIAGSSEDYGGETSASGDGSRYSLHADSFVTATDSMNGNEQSPRGEQRRPAYSAPALDMDIT…
PC9H_000401	CDS	scaffold_1	1233221	1239241	+		hypothetical protein		PF02902	IPR003653;IPR038765	ENOG410Q3PF	S:(S) Function unknown		GO:0008234;GO:0006508		2 (o1255-1272i1316-1334o)				MALVSAHEDRLAMPPSAQALLPSSAMSIQQLIAQSLPPRRNALNTIKPEAWYSKDMPSQDLQMLLTRSLPSKTTLQQIERKYGKTWMNGMNSLIDPRYDDGRDRFPLYALTLWKQLGRVVDQQESWQKALVWLEAEERSADPLVGAMITSAIGRLDELGWDVPLQYLRGSASTSLLSALFSNEWLSSDHMDMAAEELSLRIVDDGQAHLKIRVAPVAFANSLADAARYKQAYSKRQTPLLCRYEREVTAKELERLYFPIHVHGNHWIAGFIDFSSKTFGYGDSLAGQGSWPPDTFVRAVRRWLDYLDLGAFTNEHDSLLHGDQTDMFSCGVATLNTIAHVVFGDPLWSQKRNVRERISWFNRLSQRVKNMDSTPYDAVDLSTAHPAHPQDTFTSDEIAV…
PC9H_000402	CDS	scaffold_1	1243919	1245465	+		hypothetical protein		PF00010	IPR011598;IPR036638;IPR037933	ENOG410PSY3	K:(K) Transcription		GO:0071339;GO:0090575;GO:0046983						MAMTLPIPSSPSAGNSPASEESNAPRTPLSPTLPLPAEQASNANTQSAAAAANANNQGQPKRKPSRRANTAERRATHNAVERQRRETLNGRFLDLAALLPNLSQIRRPSKSSIVNSSIAHIHASRRHRLLAARELRAMKVEADALHREVNIWRDRAGLPRLEEPVRSEAFSMVLSGELEVIAAVPGDDEDEDGQGYGNYGDDDEDFAGPMGNVHGSHDDMDERHAGLSMLKNANANPFAHSLPPNAGGNHLTHILPRPAQGGPMISSPTVATFENPAMGAMYEQHESAQHFMQQQYPDVDKVTAWNTTQLYQQQSMLQAQRSLFTPPATSHGLPSSQSNPSYADQALFANFQRQQQQQQQQLAAMQQNNHGHMFGSPERDDASSVGSVNISDHGRGRSG…
PC9H_000403	CDS	scaffold_1	1249861	1250843	+		hypothetical protein			IPR011009	ENOG410JR09									MASLQLNPAPSPWGCQKKLPTTKLERYYLDDTDMTQHYSICDLKLLTSHKNTAVYKGTLTLPDKAGAVSVVVKTDFFAESPRPSAFEHEADMYELHLWDLQDKAIPHCYGLFQYGGEDGKVSSFLVLGDCGTPIEDPRNFTDSYKSKVIDAVYFIHFAGFTHGDLSYHNILNKDGCPFIIDFETAKPHVCGMKEKVFIVRAWADVDVKLEGVYTFLRMDLRRGNIDYLLSRLAHYTDNASVYRPYVEELVEQVEAEREHYRNMPQERRLIVPE
PC9H_000404	CDS	scaffold_1	1251757	1254234	-		hypothetical protein		PF12937	IPR001810;IPR012340;IPR032675	ENOG410PZAQ			GO:0005515						MFRVFLGAPTKNDISKDPASFRWQNVSSTSPSASTRPAGTQPFPPATLQAASVRISQFYKHIIFDDEEGDEGAPDGTFLEGQTTAISWDESLEDGEPGAETIDKSKSAVLSRDDTYATQEEETQEISAYSSDASSIIRFPSFTFDLHTLLKLAKVSKTPAYSKASVLAAVLEIEGPDVIHIKKGLNAGKEVSLLKMILGDDEGSVCKLTAWREIAECWGAEDASGIKRGDVVFLENLSISKETSPSSSASTTLTASPNLKSRLQICFRTMPSNSEDMQYRPDLRLGYSDATVRKVGAVVAWFEGMAAPGMPIIDRRSLIQYCATASYHNITSTTSVWKHVAIGMELPTEILSAIVGEVSDVKTLSKLLLVSRQFNSIALRQLYEDMSFSLNLAADLRSI…
PC9H_000405	CDS	scaffold_1	1254355	1257093	+	KIN3	G2-specific serine/threonine protein kinase		PF00069	IPR000719;IPR008271;IPR011009;IPR017441	ENOG410PIY3	T:(T) Signal transduction mechanisms		GO:0004672;GO:0005524;GO:0006468						MSQFLELYDPLDIIGNGSFGIIRKVRRKTDGMIFARKELNFERMTERDRKQIVAEVNILKDLHHDHIVRYHDRYVDKEAGILYILMEYCGGGDLSGVIKQAQKHNRPISEDAVWNFFLQILLALQHCHHPNGHSRSGSTGLEPDNKERRPQILHRDLKPDNVFLDEASSVKLGDFGLSKALAQSNFANTYVGTPYYMSPELMQEKAYDSKSDIWSLGCLIYELCALKPPFHEAKTHAELSILIRNGRVPPLPRGYSQTLSSVIKTMLNLNPAMRPSAAQLLQHERLVLALKISDTEKMLHTVKIHKSTLTTKEREILAREAAVAEKEAQIASVFSQKDAEIIALKDMVNQLQQHHQVQVNVEVRIREAVAKREDELRIAVAKREEEVAAAMVRREEEIM…
PC9H_000406	CDS	scaffold_1	1257425	1258792	+		hypothetical protein			IPR037997	ENOG410PFIS	I:(I) Lipid transport and metabolism		GO:0004143		7 (i136-152o158-179i200-221o227-248i269-290o337-355i367- 387o)				MSLPHDTQPTSSTTSIDRRGTTRSPSPKIAFVSANFPAHSRSTAPGQAVQNITRQVIRRLSSLQHVEVLEMPNENEHDDDELLSGRDTPSTASPPREGSPEYTNGVDHQTNGRVANGNGKVQVPAKKIDWEIPRKVLHSSIGFLTLYLWTSQGSPKAVVVVLWTAFAVILPADFIRLRWPAFERTYERLLGFLMRECEKDSVNGVVWYILGVNFALTAYPLDVATVAILILSWADTAASTVGRMFGSVTPRLPSRLPFLRLPLAPRKSLAGFVAACVTGTLIAIGFWKWIAPLRHDTQDISWTWDNGVSPALVSPAVKDWCQGLLGGPCSLGNVTSGWVGLGLIGVMAGLVSGVAEALDLGSLDDNLTLPIVAGGCILGSLKLMSLLS
PC9H_000407	CDS	scaffold_1	1259167	1260146	-		hypothetical protein			IPR008266;IPR011009;IPR040976	ENOG410JR09			GO:0004672;GO:0006468						MASLRLSPAPSPYGCRKSLPISKLQRYEPEDESQEYSICDLKVRVSHKDTTVYRGLLTLPDSEEPVAVVVKTDFFAETLRRKAFEHEVDMYEIHLWELQDKAIPHCYGLFQYKGEDAKVSSFLVLRDCGDPIVEPRNLTSSFKSKVINAVYYIHFLGFTHGDLSYDNIIINKDGSPFIIDLEFAKPHVCGLKERLLIGEESRDVGCTEMMQCAALMRAWADVYVKLEGVYTFYRTDLRRGNMDYLLSLLTHCHDDPTVYRPYVEELVEQVEAEREFYRNIPPEKRVIAVE
PC9H_000408	CDS	scaffold_1	1260311	1261604	+		hypothetical protein													MPPKTIPVDPNATPRASRRHARNTRSLPAASLDESPSRGNSQKTGGSRSHKADNIVYKTLLLKLPGVPEMQSFSESGSSTHSRAPGKDELDIKQSQQLHKVVPCPGIMHNLLRKLEESLKARRPPAGNDPFMFLLTIEGRCAHLPGRICSEHDTAHWVHSAILRPAIAVVQYLLNNNTVTQDFPNISSVGGSPPVPDSVMFKYSRDAHNAVLTIEFKTHRALGGDWTHAIHELLARAKNSDIPGAAAKFHWPDYEVTEFDKATKVLLQVWGQMRKWDANYAILSSYEYTYFLYKPELMSDTLYITDGFESDNSDLLPATVSFLALALGHYSPSDLGLPEPNIEHWNRASMVNFESTGLVPSTYPPSAQAVNVKRHR
PC9H_000409	tRNA	scaffold_1	1268497	1268577	-		tRNA-Leu
PC9H_000410	CDS	scaffold_1	1268671	1269279	-		hypothetical protein		PF03061	IPR006683;IPR029069	ENOG410PPWV	S:(S) Function unknown								MSDSTAELKKRTRTDYPYFLEYRTRWSDNDQYSHMNNSIYYHLFDSVVNTYLIEHCGLDPTHSPQIGLVVSSFCQARIQPIIIALHGFWLMVDLQRQYFAPAAFPEVLDLGLRVSKLGERSVTYEIGVFKQGAESPGAVGGYTHVFVDSKTRKSVQMDGRKKEGLEKLVSRSKGKL
PC9H_000411	CDS	scaffold_1	1269761	1270440	+		hypothetical protein		PF00652	IPR000772;IPR035992	ENOG410PYCX	O:(O) Posttranslational modification, protein turnover, chaperones			SignalP(1-15)					MLLLASLLSASLASALYLRHGQGFLVPGRMGSIADELPPSTPLEGVRIHPNFNNAKCVTVRGGVKAEGTPVIIFDCIGSASQNWIINDADTKVQWAGTNWCLTASRNPGNNVRSRITKCRDGAIGQDWYYTADLRVNLAGRGQCLDLINGNLDNANAVQTYECNPFDTNQIWNTS
PC9H_000412	CDS	scaffold_1	1271137	1271929	+		hypothetical protein		PF00652;PF14200	IPR000772;IPR035992	ENOG410PYCX	O:(O) Posttranslational modification, protein turnover, chaperones			SignalP(1-18)			CBM13		MLTKLFVVFFAAVAMASAIDMDALIARQATTTTTTTSTSTTSTSTSTTSTATTTTSGSTTTSSTTTTTSSSVAPTTSLPPNEAGVQIHPNFSSNKCLDVRGNTLANGTPVQIYDCNGTGAQKWAISRGQTHVRLAGTNFCLDAGSRPGNGVGMKIWTCFDNLPAQEWYYTGDNRIALFNKGLCLDLTDGSLTNSRQTQTWKCTDFNTNQIWNV
PC9H_000413	CDS	scaffold_1	1272270	1273881	+		hypothetical protein													MEFHHNPEASGNRHRSYIQSGTTHTPHRAPSPSLRREANRSVPPEPPTAENLHHTGRQTFNIDPDVPYIEANAGEIGIAQSQSRQNDTDANSRGPREMVGGILGGIKTAMASTRERARTSSGPTNPTTRPKSPPTRRDRPPEVDMRPTMEPTTTAVPESIYQPPGYDISAFQRLGPATVQFVTSTGVPLGPPQPVPSRQYYFGSRPDDLQRSVPAAASDDRVGDAHGDEDSTVVSHDENHTHTTQNQYFVPPTIGSPILVQPRPASDYAKMSSPAPAPSFMSFHAHMQRIGDFFKAVNRLPWVSEERVTVDYIPKDARKKISGYTRRDTYGPGSSEGSSRASSDFSNVFKRRKTLSAPRPLLSWYGGTGRNSERQTVDLLSGSSSSQSPEIEPFPYSAQ…
PC9H_000414	CDS	scaffold_1	1275267	1277383	+		hypothetical protein		PF01544	IPR002523	ENOG410Q3TJ	S:(S) Function unknown		GO:0016020;GO:0046873;GO:0055085;GO:0030001		2 (i474-495o501-522i)				MGYFSTLPDYLLNLDVFHLVPYMTSQAGSMQEKGISTQTRPTHAGHNHKPSSLASSRTQINHRENAIDSGIVLGFARYGHPDGPIYLPTDRDYFNRLVPISKDAWSKYSPTWEGFREFWDLLESGGFDQDGQQGQQAQQAQPQQPQQLTKLTLANPPSDLIASFNTDLKPDPDVQRTEQIEVRNLAVVVCAPSLTTAVAQDLESNGYEVDPLALMPFRAKPVPFEHRDKTMIIQLGFPRRPLGLWLLQEGPIDQCPEKNVVVIDNNYRSKPSYLYTSINQPRVDPEGHIRMDSLLLHIKEVDGIPTILSFAHSGDVAESMKMTIENNYWKPRFQDQSEGRDISQRLPLPFFWYAVRRWDEVSEAVDTFIGSMETVFKSQTAQRLHVLRAHILHSEGLLM…
PC9H_000415	CDS	scaffold_1	1279057	1280218	+		hypothetical protein		PF01702	IPR002616;IPR036511	ENOG410PG40	A:(A) RNA processing and modification		GO:0016763;GO:0006400						MSDIPFTPPPYSQKRTTKSLERSAAWLVDILRPSDNGVHEGEEHVAQPNVIVHMAGGASIPARKAFAETLAEALYAKEAELLKPLKHLNDGILGYVFDLVPLRLSLKTENTISDVVGDDDLDQGNTTRPIRAQIADFIPLLKASLAPLPESKVRLVNSTSCPHEVLQFIRDIGVDLFDAHWAQRAADIGVALDFKFPFGEESLDTLQQAHGKRDIGHNLYDTRYALDFSRLASCFLDGASATDLATACPCAACSPSAPTSHISHSLLDSFAKVEGSRILPPYTRAYLHHLLHTHEMSSHTLLVMHNITVLDAFFAGIRSVLSQENGKERFVTEVARFEKEYDEKLTVFDQARVLWAEVERARGKGRLAREKAKQNETTLGTAVELE
PC9H_000416	CDS	scaffold_1	1280241	1281282	-		hypothetical protein		PF00226	IPR001623;IPR018253;IPR036869	ENOG410Q0J3	O:(O) Posttranslational modification, protein turnover, chaperones				1 (o216-236i)				MSFLQFATTSKCIRQTFSFLSSRYDCSKRTLSITSRAESHYETLGVPPEASRAQIKLSKEHHPDVAKGPGSEAVFRAASEAYSVLSDDRQRRAYDRKLQQARAAAAAAAQPTAPKPSRAYTYSEWQVKRRNTVHYAWEFSSRPNSSHQHRSPPPGWTSPRQHSPAGHSHPQSHGGHYTRPGQRPQTHAQQQAHMEKQRAAQAERTQLEGVSTVSRAGIVVFTLIMVAVTGGILAELRGELRRPLEREKSKINSSLPNGSPSKPTPST
PC9H_000417	CDS	scaffold_1	1282201	1284499	+		hypothetical protein		PF00135	IPR002018;IPR019819;IPR019826;IPR029058	ENOG41KOG4389	T:(T) Signal transduction mechanisms			SignalP(1-22)		S09X			MVVTKWVLSMLLGLIQPALTTASASSRVHTGPLPSLSSPLGPVVNLGYAAFAGNDTSPEGEVHTSVTFYGGIPFAQPPVGDLRFRAPKRLDETIRDPARVRISDARNWGAPCIQQTAQVGIGSEDCLTLNVWKPSNASEASRLPVLVYFHGGGYFADLPHRIQSPFGFPFYHWVAQNQGFIAVSVTYRLNLLGFLGGAAVAADGDMNAGFHDQRAALEWVQRNIHRFGGDPDEVTIAGESAGGGSVLAQMMAYGGSKPIHFKRGIVQSGAFGLFPTTEQAETTFKNVASIVGCTGSNAKIMKCLRNASVGALASAINKGSYPPLIEGPGGFLPGLPTHLLHSGKFKKVDFMGGHTTDDVRVLIAAAPEAFQSEEDIRRILFPHLTAGLLDKAFKLYPPP…
PC9H_000418	CDS	scaffold_1	1286937	1291290	-		hypothetical protein		PF00646;PF12937	IPR001810;IPR032675				GO:0005515						MSQLPNELLQVIVTYSERKTLLNLTVISKRINAMALPILYRDITFHIKDELSISLLRHNIQANRGIKYTKAFAIYFFPCYFEGYDEVRANVDCIIPYLVNVRRLCLTRQSASPGVLSRLPASAQLTDLILDHTHCWKDLPQFLSCNPTLEAIAIHNSDNNGRVIELAASNLPKLRTLEITFNELVHIKGPMPSVANLSVHPFPWSGRATGHVVLNFPSICSLSLPHADLPVVFSLAPSLPNLEFLRVSFGNSDVRPNASDFAVFPKLRYVRFVLHRFSDEGLALELFHAVQSLVIMEVCNHFKNLRWVKSSAAPEEGGDTLNDSKPIWGEWWVKRARERIEEALIPMSQLPNELLRAIVALFERKTLLNLTVVSKRINAMALPILYRDITFRIKDGLSI…
PC9H_000419	CDS	scaffold_1	1293969	1294278	-		hypothetical protein													MSTRLPMIAPSSSTPASSEIENAMEVDDAENERVERAEVELLEATESRGERVEGDVALVEDNRLFEEAVDMDKMDAREMRGEECE
PC9H_000420	CDS	scaffold_1	1294596	1297512	+		hypothetical protein				ENOG410PRWG	J:(J) Translation, ribosomal structure and biogenesis								MSNTSTSIPTSNPSQSLLSLSSSTSLLSSSVTSLLLASDSIQDDDADDLDSILRTHSVGNESLVEGAYGGILGDGDDGGEDSDLEFVLNHSRLGLESREGFADGGQPVEEDGGDAEALALHRSFRAKRSRSGSHRMKLNSAQGTQGQDLDSVVPPVPSIPIIPNTPQTPHTHATRAHTKSGSDSARERGRREEESGRSSSPEIGEILASTPRPARSKSRPRVGQPGGSKSAPGSRRGSAANSASISRSTSIASAASMSKSLSRSASRSTTSTASVLSASTSRTSRSTGGGGVVDLDADEFGFIGGVGAHMSDGGDEDGAGSDSSLDLHTPLPHLMVKHGMLSPNSKLLPAGMSPFAMNFGDAGASTTSLSTTNSLANASTSKGKGGKGAGNGLLKDERD…
PC9H_000421	CDS	scaffold_1	1301787	1303271	+		hypothetical protein		PF00734;PF03443	IPR000254;IPR005103;IPR035971	ENOG410PMZ2	S:(S) Function unknown		GO:0005576;GO:0030248;GO:0005975	SignalP(1-19)			AA9		MKSILSIASLGYFLGTAYAHTIFQELWVNGVSQGHKVGIRVPDYDGPIENVNSNDLICNGGINPYQQPVSQTIIDVPAGADVTAEFHHQIRGRNPLDSSDPIDPTHKGPILAYLAKVPSALQTDVTGLDWFKIYEDGYGPGTQWAVDRLIANQGLVTFKIPECIPDGEYLLRVELIALHSAGSYPGAQFYMECAQLRITGGGNAVPFPIAHFPGAYSGTDPGIKISIYWPPLTSYVIPGPPVFSCNGTAPTSSAIPVSSSVVPTPPITSTSTSSARPVEPTGPTVGQWGQCGGIGYTGPAVCVAGTTCTAQSEYVRHCMPSHLPRLC
PC9H_000422	CDS	scaffold_1	1305022	1305627	-		hypothetical protein								SignalP(1-19)					MKFSLAVVASLFFAAQAVALPAELKDAEAANVAHGCPNGKRATPLYRAFNPSVTDHFYTTNAVEVRNARGYQQEGQAGRVFSRQESSTIPFYRLYNPSNADHFYTTNRGEADNAANTLGYNREGVAGYVFGAPICGSVPLYRLYQVGSVNHFYTTNQWEADNAANTLGYTREGVAGYILQ
PC9H_000423	CDS	scaffold_1	1306399	1307577	-		hypothetical protein		PF03443	IPR005103	ENOG410PMZ2	S:(S) Function unknown			SignalP(1-18)			AA9		MRSTLALSSLAFVGSAYAHTIFQELWVNGVAQGHNVGIRVPTYNGPITDVTSNDVICNGGINPFLQPMSQAIINVPAGASVTAEWHHGGSGPDPNDASDPIDPSHKGPIIAYLAKVPSALQTDVTGLDWFKIYEDGYGPGTEWAVDRLIANNGLVTFKIPQCIPNGEYLLRVELIALHGAGSYPGTDPGILIGIYYPPVTNYTIPGPAVFSC
PC9H_000424	CDS	scaffold_1	1308146	1309098	-		hypothetical protein			IPR011009										MTSLRLGPGPSPWDSPDKKLPTGELARYDVQSPTPQRYHIASLEFFVDDTETAVYRGSLKQPDNPELEKVVVKTDFFAETLRQGALEHEADMYELHLSSLQGLSIPYCYGLFQHKGEGDRVSSFLVLEDCRDRIKDASSLTNSFKYGYTFHLVNVVYRVFASRLKALDALYGIHCAGYTHGDLSLNNITDKDGEPFFIDLETAEPHKCEMSERIMVGEEKRDIECDEIDICCMLLEIWADEDVNVKGFFVFRRAYLRRENIDFLLSRLIHHNRNTEVFRPFVEQLVEKIEAEREYWRKAP
PC9H_000425	CDS	scaffold_1	1310221	1310950	-		hypothetical protein		PF00652;PF14200	IPR000772;IPR035992	ENOG410PYCX	O:(O) Posttranslational modification, protein turnover, chaperones			SignalP(1-18)	1 (n5-13c18/19o185-204i)				MFSKVIAFALVAVSTVAAMDLNHLAARQGTTTTTTTTSSTSSTTSSASSATTTATSTATTTTAASSSGTSSASSSTTSSMVPTATGAPIHPNGNRGKCMDVRGNTLVNGTPVQIYDCNGTGAQKWIVQKGQTKVRLAGTNFCLDAGSNPANSVRMKIWQCYDNLPAQEWYYTGDNRIALFNKGKGFVHLASSLLIIILFQDYVLTLRTGD
PC9H_000426	CDS	scaffold_1	1311885	1312690	-		hypothetical protein		PF00652;PF14200	IPR000772;IPR035992	ENOG410PYCX	O:(O) Posttranslational modification, protein turnover, chaperones			SignalP(1-17)					MYKQLLLLVIAASMASAMNVNLLAARATTTTTSTSTTTTGTSTTSTGTTSTTSTGTTTVGGSSSSSVSSSASTSTTSVPPPAAGVAIHPNGNNAKCMDVRGGSVANGTPVQIYDCNGTNAQKWTIQKGQTKVRLAGTNFCLDAGGNPGNGVGMKIWTCYDNLAAQEWFYTGDNRIALLNKGQCLDLNGGRLSNGNQLQTWRCTDFNTNQVWST
PC9H_000427	CDS	scaffold_1	1313495	1314893	-		hypothetical protein		PF00651	IPR000210;IPR011333	ENOG410PZKD			GO:0005515						MSTYAGTPKATPTKPATANSSPAPPNFFNTASDTPFTWNQSGKNTAPVPLTSGTAKTPAAATGSSAPGATTDVNAKQSASSATQPFKFNILTSPRVTMSAPSPSVSSTPVALTKVPTMPPVRKHDTYYFADGSVIIQVGEVLFNLHQSILTLHSKQKFVELGLAFRTYSAPLVLKGVNLKDFECLLGVLYPQNLGIEEETRTVEQWVSIMKQAHMWDIEPLKQRAAKHLSTMTMPPAERVNLYQNCAMGTSPDLLPALLALSQQEAPVGLEDARLLGLETFTKLVRIRERRLMDVARGVEAGSTKTLLRGLIQEDILGLCADKPVAQTALEVRGSPNNESSPNPNTYSLPALSLLPSPPSRTPSTSSSTSSSRSSVDGLDDAVKVEKPARDDADDSGDS…
PC9H_000428	CDS	scaffold_1	1315548	1316574	+		hypothetical protein				ENOG410Q406									MPPKLRSSSLDVSPWKDDASTRSSESSTGTITPALTSASKWAPQTLRKASLDSHHSNDYEQESIRSSISSHTYAPSVSVSRSDSHVGKYKYSSTTALDDAFVTDNDVPTRLELNAALGADIIPLTTEITSLPCAGIRIAHGRLTGLMAWRFAVQLTDKPKPTATPTHPAFLPHKPAIVTNFILDTGSLRSLVPPETLYALGYSGKVFPGAEVGLLVQGVPVTCKVAPNGHAGRLSVQFMVAASLALYFDERLMAPVLYYSAHDNHAPSPDYVPTTVPSPPSPPFTLKQLIMSLVHFGHRPN
PC9H_000429	CDS	scaffold_1	1316986	1318125	-		hypothetical protein				ENOG410PSBM	S:(S) Function unknown			SignalP(1-30)					MTPLRFRSLFRYLPFIALVSLVALLPAVDAAHNSVYLIRNAEEPSLGFAGLTPVGQKRADECLPKVFGASSAYNIGLIIACTPDVNTTDCHTSIATANPLATALKLTVNTQCSTIESNTTSPTCVPDLINTFSKNSDKSILIVWDVEHIGDLLDEFDLENDEPDYPEEWPDIIFTLRNNYFIGQESQNCPDIDGPSTGAAAKASTTSSFRSASLGAPTLDEPITTTEGDAPVEGEPTESEAPTSEAVPEPVTTIAVPEATPTESAVSEETPLPTESTDPAAVPEPTAAPTEEALVEQPPVQKMRRRHMKKRLSFEDRFIH
PC9H_000430	CDS	scaffold_1	1319088	1322447	+		hypothetical protein				ENOG410Q31H				SignalP(1-19)	2 (n7-18c25/26o49-71i1068-1088o)				MRNLTSAIAVLLSAVIVLARAPLHRRATIPPPAESLDSDELSSPEAKYIMTPLPTLLAYSGVSFFALYLLVILRRRCKIRVTGRRLTFGRATTRMGALELDGSEVELLPTVAEPGVREVRLPLQTVLDDGRSEEVSDDITGELVKPADAPSMPLIPLSTLGQLPPPSPFSPPSSPVPSYAHPSPMHPSPPYSLHDKDPVSPYASPPSRSVGLPLSLPLIPSTPIRQSRLGSPRPSVSKSRSSPGFNSARFATYPQRSKSSPPLPRRTKLGHGRSDSHSSSSDGAEVITLQPIHRVVSPSPRSDKPTPGFTLLSPPHIALSRSKSTGSDLIDLTTPSITPSASMGSLVRVARVETESVTTMDTKDVVKDIPSDVPSVMNKDSVLTPSGEVSVKEEEDHRS…
PC9H_000431	CDS	scaffold_1	1322993	1324249	-		hypothetical protein		PF12937	IPR001810;IPR032675				GO:0005515						MHLPTEILLAIIEGLANDRPTLLRLILVSRRFNVLALLPLYEKISFLVYSIYFKKQLASVESLCRDIETNPGMQFTTTFIFEYKCSSSTISRAHLLISRILPYLPNLRSLVVEFILTEAVDPAILRLLPSTARLTYLYLACGSHRASFLQHIVLVPTLEEITIPNFYPKDEETQIVNKLSSKELPNLRSLALSVENSLLFDNLTSLSPSQAHDLGVVFSRTTNIKLKYIRFGCSEYDIRPFAQTLFDSMKHLVVVDWKSTKGDWRLSRGSKSAILIANPDDQGDRWEPMYQAVEDYVRKADNNRNGIAA
PC9H_000432	CDS	scaffold_1	1324697	1326828	+		hypothetical protein		PF01425	IPR023631;IPR036928	ENOG410PGSJ	J:(J) Translation, ribosomal structure and biogenesis			SignalP(1-17)					MLVGLLFVLAITGQCLCIPSILSFPFATRAKPITFPDLYEASVPELQAGLNAGHFTSVDLVKAYFARIEEVNLKGPALRAVLELNPSALAQAASLDRERKLKGARSTLHGIPILLKDNIATIASEGMNTTAGSFSLLGSVVPEDAGVVKRLRKAGAIILGKANLSEFAHFRAGSLPSGWSGRGGQNTNAYFPNADPCGSSSGSGVATSIGLTAVSLGTETDGSITCPSSNNNLAGIKPTVGLTSRAGVIPISAHQDTVGPMTRSLTDAAIVLSVIAGKDANDNFTLAQPSRVPDYTKALNKNALRGKRIGVPRRVFTDDSITGTDPSVNVAFNRALDIIRSLGATVVDPADLPSADEIAISNNETLVLDVDFKVQLNDWYEALKKNPSGVRSLADLIKF…
PC9H_000433	CDS	scaffold_1	1327342	1329679	-		hypothetical protein		PF02816	IPR004166;IPR011009	ENOG410Q3Z6	S:(S) Function unknown		GO:0004674;GO:0005524;GO:0006468						MWPQCQMCGVTRRNMPPTGAIQICGAIACHRQSHTLDVALNDEGHAGQSLYAGIQGGTHRLILGPLTPSAARSTNISDANQARIAATRTRLKHVTQTTGLGPTTHLSTATLQQHQHGGGAPGEPKTLFCFQVRVSNNPKKINDDLGSSAIKFANSVLMIDAKAQIVKNINTEWTRVHSSPLLSEEVSYRFAGNRLLHSDTLTLNVGDFYGYYSSPANASIYIDNVPKFWQQQVGKSKQKHPVLCFDMYVDYDAYSRRINGDENDGSVLFTAPQSRKRLRADSRVGGLEQSRQVQKRGEHFVLHYFEIDTMIADFSSSFNLSRASQRVERSMVTLKKTTCVMDPELGTPIFTVADLELSGYVSNVIFATGTMKVAYELVALDGSPYILKRFFRLCEDDSD…
PC9H_000434	CDS	scaffold_1	1330058	1331645	+		hypothetical protein				ENOG410Q3ZU									MPNPTGKNSQGKKEYPPDDVLEASLRKYVTRGLSQNDKLKRLVDDHHLSIGLSKLNQLERKFNIPSLRRCAPSVDIVRQAVVDEVDKDVAQRNGPAFVTGKLRLMGIMTPRDTVRKIMHEYYPEGFDVRFPGKVRPKIPRGTLTAIGPYHEVSADGHEKIAQQALKMGEVGISIYGWKDKWSSAALWVVAVPDCRSAGAIGHLYLDFIERIGGIPLQITVDKGSETGWQCAIQYALREVFAPDVDEDTYPPFVALKSVHNVAIEGFWHWLRQGTGLSLKEILLRGKTEQLFSPSVGLHKDLFNWIFPPLVQVALDDFCTAWNHHHIRQQPDKDMPSDHVPIDALEHPQYLAGLDCRIPIPAEVIGHLREFLTEQVGPREAYLQWVTEEFSQRAHEVHTS…
PC9H_000435	CDS	scaffold_1	1332020	1335510	+		hypothetical protein		PF00498	IPR000253;IPR008984	ENOG410PZ80			GO:0005515						MTLDSSGFSDVGRYGTVYLMKKQDPATPVTAFPLDDEETTFGRDQSCSIRLYYPQVSPIHGKIYFEDRKAFLVVLGASGLFVDGCKVLPTAAGTSSQHSPRTIPLTNNTEIEIQSKRFKFTYPPKELRAALLATPARTTQTPHRRRALRLSMIQSAQVFTPRPSPDPRENLRILQSPLRPFSSPKKPSPLQTPSDHEEEEEEIVLVDGNHPRVVEDEKDLIILEDVEVEINDVEQPQTRDVTMLAPPSQTRNPPPQTPQRRARPSLHKAVLIRSAQRAIMKAEIEREEEEEIQEVEEFATQTHSGSEESSSEEEDEDEVEEDMEPQGMTPTWRKGLDAVQRTLWPFGREPETGDFAEDHDEPQTDEAKTDNEPPRAYGNFMTPQVPRRTGDAGRLSMGG…
PC9H_000436	CDS	scaffold_1	1335931	1337350	-		hypothetical protein				ENOG410PWWC				SignalP(1-19)					MTFTGSVLLAFVFAAVVHAAGDKAQAKALGNSKDAAQACFGDATPFFLPGDPDKVLNCCIAPRSVTWFDQTAQIGECCSPGQTWTGNQTTLEGGCCDGGQNWSQDKASGLGGCCAPSLVFVGDRATKTGGCCTAGMSWLNGKCAQSPPRATCQDLADPVCGDTDDLGIQYGHCYILKFPDGTQLGSNHDGPAYAKDGFFKDIPFKVCRSTTDCALGEAVPTDGQFLLQDQMGRPENAKGTIGWVDNGAGGTHIKFNTNAAQAGVFEGIPACSGGKCFIRLRRIGATCPMPDHGLTFWPNPKVSMMISFTETACSGPDAPFVPVTSANPAGLLNAFRAPRPSHPGSNASPAAPVSQQAPSSLVASATSARASATEAAVSAAREGVSATVAAASAAESAPA…
PC9H_000437	tRNA	scaffold_1	1338682	1338776	+		tRNA-Ala
PC9H_000438	CDS	scaffold_1	1339637	1340676	+		hypothetical protein				ENOG410Q46D					5 (o6-28i35-54o87-108i129-152o164-182i)				MIPSTIAAHAMVAIVGLISQLFFAWRIFQLCRKRWLLVLTCVVRESAIIQYQYLQLNSEYEYDNCASSIPNVADTAKRSLGTVATPLWMGFSVSCDLSITLSMVILMFKALKEAIFRKTRQTLSNILRFTLETGLLTTAVIAVQIVFMLRVVNPTGDEPTGLRWRYIFFYPTGVVYSSWLLASLNARATIADDGSLVLSTISALRSTQPTPGTARPGNGMFGHVEPVVGSQ
PC9H_000439	CDS	scaffold_1	1343417	1345261	-		hypothetical protein													MDPLSITAAVVSFVDIAKRIKDSVDKVGQTRRNLQQLVENIVDELTALQKLCQGGGLNRFDPDSTRSLEKLHSDLINVLERCQKLTEQRRTKTRLSSARYYVIAWLKDAEIEGHILRLRDRVSSVHRRFTMIASLRAERADHELLVATSDIRGAMHRMETLLSPFFIASHESGTYPASSLDRTAQLDGFDYQFLHRQVRRAADLLGRISATQAFTVEETRGPICVVYRTERRWPSRPSLMRMATIETLQLLELDPSDLALWEGAVHLLYLGKYLFDLRLEDDAAAICVGVVNLYQALMRRNPRTYLPCVAWGLELLSCIHFGTTEGLDAAKRAVDICRETAAVLQEDYRVDLAHSLRLYSNHLAANGCFDEALVYAVEALAMQRQAPLPQHDPDCPSVC…
PC9H_000440	CDS	scaffold_1	1345896	1348196	+	CAP10	capsule-associated protein CAP1		PF05686	IPR006598	ENOG410PHAQ	S:(S) Function unknown				1 (i20-39o)		GT90		MPLTQKQFVLGFVSQRRGTIFLICVFIAFMQAGLFSGHWSHNHLDAYPDQIVEESYWGSQAAKFLRLAESTKKVVREHPIPKLMDQAEARFREKVDRQSKTLQAAVKEYKRRYERNPPKGFDEWWHFAKANNATFVDEYDGLVSDLAPFWSLSGAELRRRTEQVGQLPSIDLVRLEKGKTSIIKNDDFRDSEAMARAHGFRRMIERFQDKLPDMNFPVNAKAEGRVLVPWEHQKYPNLTKQDSSGGVEDMLGGPFPADWRGNGNVWEAWRRTCPPSSPARRLFASVRNTFTKKVPNYLAANHTSPGNDFSFVPATASKFDFCEKPHAHYTQGHFFSDWRTIPVLYPVFSPAKTAGYLDIRIPSHYYYGSTKRYTYGWDPVNMVLKEVDDMEKPWEAKVD…
PC9H_000441	CDS	scaffold_1	1348534	1350083	+		hypothetical protein				ENOG410Q32D									MINSMPTPRVLPSPSLSTANLPYNRNPNDFQIERSPRPVAASKRTSVYGGNPFLESDYLFRETVSKFLVVKDRPTTVSGRIPLDPSHLVLFFRSKSGITHSLDFPIDVDYNTPPALDVLIAACRPHPSSNVDGLDRESLYYPSNLPLTTSLEIANHPILEAIRNTLFPALPTGHYLTVSRDQLEVVAVGGRMDPQPQELRNDGRSATIIVTLPVRFRGGALVVHDPEGGSEKYDGRGGKSGDIEWTAFVADCDYEVETVTKGCRITLSYGVYLKTFGPSGLNPDPLINPSDNFLDLLSPIFNLARGRKIAFYIMNDYEVNPSEVLAEALVPELKGGDSVLYHAMKYYSLVPELHWTAGGYIWPIDKTVELSNEDISLNTSAHGRKAMGVVNGGHRNSPA…
PC9H_000442	CDS	scaffold_1	1350524	1352693	+	ITR2	myo-inositol transporter		PF00083;PF07690	IPR003663;IPR005828;IPR005829;IPR020846;IPR036259	ENOG410PG6B	G:(G) Carbohydrate transport and metabolism		GO:0016020;GO:0016021;GO:0022857;GO:0005215;GO:0055085		12 (i57-75o103-123i130-148o160-177i189-212o218-239i310- 334o346-364i376-397o417-439i451-473o485-503i)				MSLPIDEKRLSTSERLYAVSEKDLETTGTREAVIGDLDNGEINEMAVVAEGEERTTWFVWILVASSAISGLLFGYDTGVISGALVTIGSDLGPAELSNGQKELITSSTTLGALLGGLVAGILSDWTGRRPVLGIADIIFIGGAIAQAVCHDVWSMIGGRFLIGIGVGLAACIAPLYIQELSPTRLRGRMVVLNVVMITLGQVIAYGIGAGFANVQSGWRYMVGLGAVPAGIQIFLLFFMPESPRILVRRGNLSAAHAVMTRVYAHANEKDVDLKVKVLQAAVQQSIKITNSTTLFQRCRSMLSNPVNRRALIVGCGMQAFQQLCGFNTLMYYSATLFKDIGFDQPTAVGLIVSGTNFVFTLFALKWIDKIGRRNIMIWTAPGMIFGLTFASICFHFLTR…
PC9H_000443	CDS	scaffold_1	1352749	1354540	-		hypothetical protein		PF07942	IPR012901;IPR029063	ENOG410PHDA	G:(G) Carbohydrate transport and metabolism								MSKSPTAQDAEEEEIHFSRVIATFRNYLRYSLAANNRRRKDLFTIPRADRELIGRVGYKSKLDEVDKAIKANADFLDLIVSDPAIFGHNVDSTSAEEEHPSDVAEGQPHDGPSGQHGHSHDHGHSHDHGSHSHSHGGPSSRSETASSDFDMDKLRSTIKQFVRDWSAEGKEEREQAYAPMKEALLNHFSDIPPAERGNFRVLVPGCGLARLAYDIAKLGFACQANEFSHYMLLPSFHILNRTDQIEKYTIYPYVHSFSNVPNRQAMLRSIRIPDVLPSDLPSGANFSLVAGDFEEIYGETEEPEDGAPSAGHWDAVVTCFFIDTAKNVVNYLRIIHQILAPGGVWINLGPLLWHFENNNTNDPSIELDLEEVKSLCREIGFDISNERTIPTTYCSNSEG…
PC9H_000444	CDS	scaffold_1	1354687	1355859	+	ISY1	NineTeen Complex (NTC) component	EOG092R0MWX	PF06246	IPR009360;IPR029012;IPR037200	ENOG410PKY9	A:(A) RNA processing and modification		GO:0000350						MARNEEKAQSMLYRFREAQAAELGLGTRGDRRPRMASACKSLRECERWRGEILREISRKVSKIQDSGLTDYEVRDLNDEINKLLREKRHWENQIVALGGANYRRNVAMLDDDGKEVPGTKGYKYFGRAKDLPGVRELFQSRKQEEEEENQAYAFYKKFMNQGPSYYGDTDENDGEILKYEANAENEEWEEAYSNLREALGIPTDGPIPKFQREEVNGRPPPPIDGNASAGNKRKASEDDDVDMDVKRTKADSQPDGRVTQATPNEPARLHAQMAASYISFIDADILLPPKMPTRDEMEKVLLELRKKALVEEYFGEES
PC9H_000445	CDS	scaffold_1	1355984	1358223	+		hypothetical protein		PF01425	IPR023631;IPR036928	ENOG410PGSJ	J:(J) Translation, ribosomal structure and biogenesis				2 (i21-42o520-541i)				MAVSARHRVEEKATNDAASKHCGCILSITVLVGLLSILVITGQRLYVPNTSSSLFATTTKSNGVALPDLYEASIAELQAGLHAGHFTSVDLVKAYFARIEEVNLKGPMLRAVLELNPSALEQAATLDRERKSEGARSPLHGIPILLKDNIATHPSEGMNTTAGSFSLLGSIVPEDAGVVKRLRKAGAIILGKGNMDEFAHFRGDNLPSGWSGRGGQNTNAYFPNGDPCGSSSGPGVATSIGLTTVSLGTETDGSIVCPSSNNNIVGIKPTVGLTSRAGVIPISAHQDTVGPMARSITDAAIVLSVIAGKDNNDNYTLAQPSFIPDYMEALNQNALRGKRIGVPRRAFCNDTDIEESVNVAFNHALDIIRGLGATVVDPADLPSADEIALSTNETTVTDV…
PC9H_000446	CDS	scaffold_1	1358701	1361000	+		hypothetical protein			IPR011990	ENOG410PSNJ	P:(P) Inorganic ion transport and metabolism		GO:0005515						MDPLSITASAFTFIDIAKRIKDSVEKVAQNRQTLNELMDDVVEELTQLQRLCQDQQGRLNYLDPESTRSLEKLHSDLVNVLDRCLKLTKRRTANRGLSSVKYYVIAWIKNAEIEGQILRLRDRVSSVNRRLNIISALRVERAESELLVASSEHRAILNRLEGSISQLLINSHAMGTYPASVLDHPSSDGVEYQYLCLQVRRTAELLSRVSDTYTFTIEETRGADPIGYRYQSDVSLMRSTTIEVLQTLQLLEFEPSKLALREGFQHLRSLGNQLVRLELEEDAAIIFTRTINIYELLMQRNPGTYLPYVAWGLRSMASICYGTSEGLDAAKRAVDTCKEVASMLREEYSLHLVRSLQVYSCHLAENGHLDDALAYAKEALAMQRKAPVPQQDSGCLSIS…
PC9H_000447	CDS	scaffold_1	1361212	1363852	-		hypothetical protein		PF01398;PF08969;PF14464	IPR000555;IPR015063;IPR037518	ENOG410PIV2	T:(T) Signal transduction mechanisms		GO:0005515			M67C			MSSSTHQPRASSHRPNGGSSPRPASIAELAERALDNPWEEGRELKYYLRVAEKCRRDGREAMQKGDLENAFVQHARAATLVLEKLPSHRDYHELLSSAQRHNLGLNGQDILDSLSDLKPTLVERFEKWTRAHPDWDPSQDQSSQHQQAEAETQRRTRETGEWRRQRETQPQPQPQQRAETPQSRRAEPPRSNGPDYTFSQPPTAQAPPPRQQPPPDAAFDYDKMNSQLNISSEDKHQQQQEEMRRRREEIARRHAEERRREQQAGIAQRQFEAESAARAARQDLTGHSPTPLSAAASAPSILATTPSIYYPSTTPSAAMPPPASTSSFSTPAKIQYPSVSSAPGTLRAPSASGSRMPSFPDQLTASDGPTIMPLESPTKYEGDSTDSESLARNHDWRRG…
PC9H_000448	CDS	scaffold_1	1364056	1365990	+		hypothetical protein				ENOG410PTAP					1 (i61-84o)				MESPSESPSQPVDKGKARAIAITEQTPLLGRASSSTSTAEFHAPSTPTTPRRALWHRMLKVFLVSFLFCLLAFTLLAFLLYSYAAQAKGTPIQEVLNSSLIFHGPSHVDVLHITDTGKIHLLVKGKIGVDAGSIIKVHRHPDSDGLWSKVRKSIGRWGIRKLDRVSLRLQPIAISPYYDTLVTLGHVEVQPFEVPLAANPPLDKSWLEDITLAVAVVPAQNVSDLTTFVKDAWSSGRFDVRADIDEVAVRGGALGDGGWRGLFQRSISHPRVDIQVPIPPLPGLPQPGKHLPLPSFSQLVTLLSFNITTAEQELSLKARATAIDPFPETISLTTPPLPFTISLPTPDSLIPIASVETRPFDLTHPNITLDIEGHVLPLTTGSSSVLSAFLSRYLSGEAN…
PC9H_000449	CDS	scaffold_1	1369382	1371709	+		hypothetical protein		PF00135	IPR002018;IPR019826;IPR029058	ENOG410PN4W	T:(T) Signal transduction mechanisms			SignalP(1-19)		S09X			MAILQVVVTALALLPFIAAQAPQVQVGNTAIIGRSIPEFGQELFAGIPFAEPPVGQLRLSNPVLKTRLGTPTFDASNFGPACLQPASVPLMSEDCLRINVLRPAGIPTGVVLPVMAWVYGGGFDFGDSSIYNASAIVAQSVIRGTPVVFVSLNYRLGPLGFPQGVEAQKRGALNLGLKDQLAALEWVQANIGLFGGDKSKVTIFGQSAGSISLSIHFLNSNIKRLARAAIFESGFPATSLNFPASHREQGWANFVKDVPQCASTAGSKDTFSCLRSDSIDEATLLKAASLADDQSGELFAWDPTIDGPGGILPDIPSKLLARGQFARLPFIAGTVLDEATTFTPKFITTEDQIRQSIIANFTPSPFGPAVLAKSAETILQLYPDVPALGSPFGTGNETF…
PC9H_000450	CDS	scaffold_1	1372225	1374298	+		hypothetical protein		PF00450	IPR001563;IPR018202;IPR029058;IPR033124	ENOG410PHXN	E:(E) Amino acid transport and metabolism;O:(O) Posttranslational modification, protein turnover, chaperones		GO:0004185;GO:0006508			S10			MSTPACHSVFTSRQQQDVQLRFIKDSGVCETTPGVGQMSGYIDVGKNMSMWFWFFEARESPETAPFTLWLNGGPGCSSMIGLFQENGPCNVNADRTTTTLNPFSWNNLSNMIYIDQPIGTGFSHGVDTVNSTLSAAPPVWTAFQILFESGEFSKFKKREFIIATESYGGHYGPAFVTFFNEQNAKIRSGQIQGEEINVSALMINNGWYDPLIQNQAYVDFATNAPGYGQLQSDTVIAQLNDAFFRRGGCKDQEEACFAAGDGPTSDRICRTADNFCVENVFAPAVGDRDSDDLRQTSPASFPPSFYINFLRLPEIVNRIGAEATYSQCPDAPFELFARTGDDARTLLPQLAALANSGMKILIWAGDADINCNWLGGHASVLAMDWFGKERLNNTPFTNM…
PC9H_000451	CDS	scaffold_1	1374328	1378399	-		hypothetical protein		PF00400	IPR001680;IPR015943;IPR017986;IPR019775;IPR036322;IPR037590	ENOG410Q13H	U:(U) Intracellular trafficking, secretion, and vesicular transport		GO:0005515;GO:0032008						MSAGTTNSVQRGRKLSILTTTLPVVDFYSDARTHGYQGPIRTIRLPRVTSSGGGAIARNEDGTHCAVAGMDSLRVVSLLSPSNQSTEYKSSSGRGGQGGHRIEASRNFWDGGGLTSASTDVSWGFGSYGNKIFTSARNGEFFMWDASRSSSGKYSIERRSKEHTRSIHKLAVSRFSYYCITGSADGTVKLWDIRDLTKPASSVRHPTSVRTLAFSPFESHPYQAIAGLDNGSIYRWDLKMGQRGQLDRLLVAHSAAVTSLDWCNTSSNHSSTDMSGGGLGWIVSGGLDHCVKVWDLSSTSHLQHKPTYTLHPSFPVRRVMWRPSYPCEVAVVSNAEFGSGSNPDMAAPDAGSGTSSPDGRDRASIRTKQYAGDPIEIWDIRRGWIAKWSVNGSASEGGV…
PC9H_000452	CDS	scaffold_1	1378691	1381570	+		hypothetical protein			IPR017853;IPR041036	ENOG410PHQ1	S:(S) Function unknown				1 (o735-752i)		GH5_12;GH5		MHPSAENQTPGAWSSSYAHNWSAQATDGPLRVHGRHFVDGFGRVCNVRGVNVSGNCKAPVNHDHDTFPHKHDEVTFVGRPFPLEEAHEHFSRLRRWGLTFIRFLVTWEAVEHAGPGIYDLEYLDYLERLLSLLPQYGIVAYVSVHQDVWSRYSGGSGAPAWTLDAVGFDLHKLEESGAAWLLGVKGGGHVEAERGLWPCGYQKLAAATMATCFWAGDTFVPKVRIKNQHGEEVSVQTFLQDAFLNMYEVVVKRVGHLEGVAGFQMMNEPHRGYIELPSLHGFDYNTDLHLSYVPSAFQSFMLGSGYPTSVAHWTRSFPMPTRRTSHSVLNPAGHKAWRKDGPTDGRCIWEMHGVWGYDTNKKTGVVLRENYFTKHPMNGKKIDWYTDYYFPLLDKWSKR…
PC9H_000453	CDS	scaffold_1	1381889	1382729	+		hypothetical protein			IPR011009										MTSLQLDTSPSPWGSPYWKKLPSEELARYDLQAPTDKYFIDNLELLVDNMETALYKGSLKLPDSPDLVKGVVKTDFFAKALRTSAFIHEADMYELHLSTLQGLSIPYCYGLFHHKDKDDKVSSFLVLEECGDLIDDVSSLTNSFKLKALDALYKIHCAGYIHGDFSLNNLTVKDGQPFFIDLETAEPHKCEVTERIVVGEERRAIECDEIDLCCMMLEICADCTKLSIPVYDIQLTTVSSPAKVKVEGLWSFRERTFGERT
PC9H_000454	CDS	scaffold_1	1384124	1385415	+		hypothetical protein		PF02668;PF06155	IPR003819;IPR010376;IPR038492;IPR042098	ENOG410PFA3	I:(I) Lipid transport and metabolism		GO:0016491;GO:0055114						MFPALLRSVARKSATQRLSRLWSSFSVNASSLRIDAHNASFPYVWLRDSCQSSDCVHPSTSQKLHRSSDIPLDIKPTPDGVQLTPDGGVRVQWTDGHESFYDSAFLTRHSSEGRLAEFHKDISPSSWDASTISAIPELFTEYAALRTEKGHLDAITQLTRYGLLFVRGVPHEETAHETCELRALADFFGPIRETFYGGTWDVKNVTNSKNIAYTNLFLGLHMDLLYMQHPPRYQILHCLRNRVKGGESLFVDALHTANIMRTSHPAAFKTLASTPVSFHYINDGHHLHYEHPTIELGGLPTASLDERPVSHINYSPPFQAPLPLHSTPLEFYPALKQFANLLDDPQYEYRYLLKEGDAVLFDNRRVLHARMSFEDTEGKEGQTNRWLKGCYLEADAMLD…
PC9H_000455	CDS	scaffold_1	1385516	1386842	-		hypothetical protein		PF01575	IPR002539;IPR029069	ENOG410PI66	I:(I) Lipid transport and metabolism								MSYDLSKVVGHATEDKPVTWNKRDLLTYAAGVGAKKDEFSIVYELDKNFSMLPTYPVVLNLKGDSQELNLFAERVNGAKPLPGLPPLDPNRMIHGTQHIELLRPLPLVSGPGWKLKGRYTGVTENKSGIILLVEQTLVDGNGTPYAKLYSSSFNLGAKANGTNFKKIIAGPPQEKPIPKDRKPDWTFKDQTTPEQAIIFRLSGDYNPLHIDPKIGQAGGFGGVILHGLSTYGFGVRAIINTVGGGDPKSVTLYGGRFTSPVKPGDALETEIWEVGPGPNGTTEVAFQVKNLTSGKISLGNSIAYVKKSEKSKL
PC9H_000456	CDS	scaffold_1	1387256	1389337	-		hypothetical protein		PF00067	IPR001128;IPR002401;IPR017972;IPR036396	ENOG410PG34	Q:(Q) Secondary metabolites biosynthesis, transport and catabolism		GO:0020037;GO:0005506;GO:0016705;GO:0055114						MLTPIATLDAALAGVGLFCIYKIATRKSLGPLPPGPKGLPLLGNVLDMPKEKEWLTFAKWGEMWGDLVTITIFGQPFIVLNNIDVAAELLDKRSAINSDRPVIPMGGELVGWKNTLVLIPYGARFRSFRKKFHQVIGTPAMMKQFEPAEEHETQKFLRRLLKSPEDLGAHVRKMAGAIILQISHGYTVAEGTDPFVTLADEATEQFSYSTAPGGFLVNLVPPLASLPDWFPGAGFKQTAKEWAKTLDETASYPFRFVKEQMASGTAEKSFVSALLEEPVSPEEENDIKWSAASLYTGGADTTVASNYAFFLAMTLYPEVQKKAQAELDAVVGPNRLPTFQDRPNLPYMNAVAMEALRWHSVAPTSVPHRTTEDQFYKGYFIPKGTLFITNIWKMMHDPT…
PC9H_000457	CDS	scaffold_1	1390525	1392733	+		hypothetical protein				ENOG410Q446					6 (i12-35o107-126i138-161o181-201i213-240o246-267i)				MSAIAIDNTMGAALIGCILAAALYGVSTVQTFFYFTHYSRDPWYTQQIVLAVWVFDTLHQALITHTVYHYVISNYFNPTALGNMIWQEYPGMLPVGFSFIDPCIDEFSQLEVLVNGFIGLIVQSYLMHRIWRLSGKKIWPLILIGPFIVGEFMCSLVFTILSLQMTTFAELTSLKGLSMSVNVLAAAGDLLISICLVLMLHKRRTGFKKSNTIISRLIIFTINTGLLTTMCAIASLISILVWDTTLIYVSFFFCIGRFYANTLLATLNARSIIRSVGADSDTNSVPLSGRHASSTLNKVGGPKPTNISIQIDTAHEYMRDDDSTTMKTKLPSAEAM
PC9H_000458	CDS	scaffold_1	1392907	1394890	-		hypothetical protein		PF00069;PF07714	IPR000719;IPR008271;IPR011009;IPR017441	ENOG41KOG0694	T:(T) Signal transduction mechanisms		GO:0004672;GO:0005524;GO:0006468						MSKDQPSPGPLRVLRLKNSINKLRAVAAWHEAPRPVSFPRARPTRGPWREDACAPDGLRHDSDPVEPSETVPLGPLPLRLHEVGLSRSWQFTVLDLVQSLGHGASGSVYAARLGRVHGSNVAVKIISKKDMEPSVLQAVLNEQAALKRLIGLPRVLQMEASFHDARNFYIVTSLYANGDLEAFLDDCSRVPLPLLKPWLADIVWGLEALHKKGIIHRDLKPANVYIDDRWHLVIGDFGLARVFDSNGSESFDIRPYWLSEDQRATADDCCVTRTFCGSPAYSAPERVCGYKYGFEVDYWSMGITAFEMMTGRLPWYNLDLQVLASRIVHEPLVFHEGECEQPAAADFISGVLSKVPSERPDIHGMKSHPFFRGFDWTSNFFPASPLPVRRPPPPPPQRR…
PC9H_000459	CDS	scaffold_1	1395259	1396735	-	CPR6	peptidyl-prolyl cis-trans isomerase cpr6		PF00160	IPR002130;IPR011990;IPR013026;IPR019734;IPR020892;IPR029000	ENOG410PHJ3	O:(O) Posttranslational modification, protein turnover, chaperones		GO:0003755;GO:0005515;GO:0000413;GO:0006457						MSEAEASTSQRPITFFDISIGGRPVGRVVFSLYSDLVPKTAENFRALCTGEKGIGQSGKPLSFQGSAFHRVIKGFMCQGGDFTAGNGTGGGSIYGEKFEDEAFVVNHTKPFLLSMANAGPNTNGSQFFITVSQTPHLDGKHVVFGEVIKGKSIVRQIENNPTGQGDAPIAPVVITACGVLSPDDPSLAAETSTDGDPYEDFPADDDHDLSNADLVLDIAKKVRELGNALFKSGNTNEALSKYQKSIRYIDHHISIVDSTPAERQEAFNALLAPLLLNSALAAVRLQPASTYNADVAITNTSRALDELKLSDSDKAKALYRRALARSIRKEDELAENDLVEANKVVPDDQAIANELAKVRQRKKEKRDKEKAAYKKMFSG
PC9H_000460	CDS	scaffold_1	1397067	1397616	-		hypothetical protein		PF04774	IPR006861	ENOG410Q3UH									MTRTERATNPRAVIRDRSESKSGLNKSMPKNGAGTHNWGSYADERELEDAALADEEQELGDDLPKAEAKKPAAVRSLSGPSEQELQQAKEFRKGALKAEGIDLAAIARTSAAVASSPPKGYASPISPSV
PC9H_000461	CDS	scaffold_1	1398051	1402054	+		hypothetical protein			IPR000300;IPR008936;IPR013783;IPR036691	ENOG410PRE9	U:(U) Intracellular trafficking, secretion, and vesicular transport		GO:0046856;GO:0007165						MSEILNEVRALLLPADDAQVALEVLVADEEKSNNPGSSDQPHLLAVISHISSGSSQAGGHEEGSVFLLRRSPSERFEIQRVFPIFRDLSLNLAQSRRATLDLSAAAKPVSNQPRTGFVLTLQPGSQIPPLVLTAFDTHNLRPLLSECKRLQELALTHSTDQGAAYPWLLPYTLRKNTQPIMSHTPIDLRILNKPLHERLSPASAGLPGDDAADITLIRDHWVRQQARNACHKGTHQLTLRVGTFNVNGKPPSEDLAAWIRGTESFASKLPPLENLSPLSIGLSERPHSDLQRALSSNASSLDRDPDIFVFGFQELDLSTEALLYSTSTIKEDSWTAAIFASLGNKAPQYTKLASKQLVGMLIVIVVKADLKPCFSDVRLSATGAGIMGVMGNKGGTAVR…
PC9H_000462	CDS	scaffold_1	1402120	1404364	-		hypothetical protein		PF07690	IPR011701;IPR020846;IPR036259	ENOG410PG9P	G:(G) Carbohydrate transport and metabolism		GO:0016021;GO:0055085		12 (i50-70o90-109i116-137o143-166i178-199o211-231i252- 276o288-307i314-337o343-369i381-401o407-432i)				MAASLPDYREGEGDTPTLHSMDDKEKQEISVKETVLPSSHQEFPEGGLQAWLSVLGAILVQFCTFGYISSFGVYQGYVATYLTAYSSSEIGWIGSIQVMLIMSMGLFTGRAFDAGYFHHLVLGGTILHGFAFFMLSLSHQDQYYQVFLTHGLLGGVGCGVMYIPSLGIPSHYFHRKRALTMGIVSAGASAGAVIHPIMLNRLFHGSFGFHNGVRASAGMNLGLLLLANVLMKPRLPPKKAASIHVKAFIRDIPYVFVVFSGFLCMTAMFIPIFFLQLKVVKGGMNRTFAFYSISIMNGASVVGRLIPGFFVQRFGVINLMVVNTFGIIALMFCFMVVKTVAGVVCFAIFFGLFSGSVVTLMPPLLASLARDFNEIGARMGLCFTLMGFGGLVGSPIAGA…
PC9H_000463	CDS	scaffold_1	1406087	1409132	+		hypothetical protein		PF01096;PF02150	IPR001222;IPR001529;IPR019761;IPR020846;IPR034012;IPR036259	ENOG410ZQ62	G:(G) Carbohydrate transport and metabolism		GO:0008270;GO:0003676;GO:0006351;GO:0006379		11 (i37-58o78-97i104-125o131-154i166-185o205-223i244-268o280- 299i306-329o335-355i367-388o)				MTESLDLEKHVSTKYSEPETEESSLSAEFPEGGLQGWLTLLGVWIVQFVTFGYTNAYGVYNDYYVREYLSPKYASSEISWIGSVQLLLVLSSGLVTGRAFDSGYFYPLMYGGSALFVFCLFMLSITKPEQYYQVFLCQGLGLGLAIGITYVPCLGVLSHYFRRRRALILGIASSGSAVGGIIHPIMLNKLFYGAAGFHQGVRASAALNLGLLAFACLLMRTRLPPKQSRGPSVVQQFWNFIHDPAYVIMVFGTVVTICGIFFPIFFVQLKAVVNGLDPNVAFYTLAVLNTASTVGRIVPNFIVGRFGVFNVVIPCVAACAILNFCALAVNDAAGTIIFAITFGFFSGAYIGLLAPMISSLARNDAEIGARMGICFTFTGMGGLVAIHLCLDPLSIAQRP…
PC9H_000464	CDS	scaffold_1	1409248	1410639	-		hypothetical protein		PF12697	IPR000073;IPR029058	ENOG410PJ9N	S:(S) Function unknown								MSLTTVHLVYIHGFQGNDTTFQSFPTHLQEHVAARVPAHLKVKIISRIYPTYKSVKPISHATKNFLEWLSTQPPGPVILLGHSMGGLLAAEAATHPSNNPGEHPGAKPRRIMGMIAFDCPYLGMHPHVIISGISSLLPGDKDDEKASEVEMNNMDKVNMVDAKVTDDWEGFKRKLDVSTTSLSSSHSSISQSSRSPSPGLLDRALDYVSARSDDPIVRWVRKHRDEPLKAGKRWIVERFQFGICMFDPPGLRERYANLVGWKGGLWVNYWTQTRPKSPRLSDSEDDVAENDAVLLETGVVHAPPDKKKKDSKKKEKKPKPGKHFIVLPTGLGKLLGGDSNWERVLIEGVNDEVAAHTGLFIPRQNLDYQGLVERTGTKVLNWCEKIHNRAP
PC9H_000465	CDS	scaffold_1	1413059	1413631	+		hypothetical protein		PF01185	IPR001338	ENOG410Q3VT	S:(S) Function unknown		GO:0009277;GO:0005199	SignalP(1-19)	1 (n3-14c19/20o77-98i)				MKFTSVIALVATAATLVGAVPFETNAERLARGLPPLPPARRASGVEAAKPKPSPSHGCSTGPVQCCNDLVDRSNHTVGILIGLLGIVLGPVTGLFGLGCSPLLGGGAKCQSQTVCCSDNKFSGIINIGCSPINIGL
PC9H_000466	CDS	scaffold_1	1414739	1417713	+		hypothetical protein		PF01777;PF13634;PF13874	IPR001141;IPR008991;IPR024864;IPR025574;IPR025712;IPR038655;IPR041991	ENOG410PPXF	U:(U) Intracellular trafficking, secretion, and vesicular transport;Y:(Y) Nuclear structure		GO:0005840;GO:0005643;GO:0003735;GO:0006412						MVRVYKPGKVAIVLQGRQAGKKVVVIKQLDEGTKERPYPHAIVAGVERYPRKVTRRMGQKKVARRSKVKPFVKVVNYSHLFPTRYALELEGLKGVVSSETFKEPTQREEAKKTVKKLLEDRYVSGKNKWFFQPLRSPAFPLSTESTRQPDTMFGAFGNTANNATPAAGTSLFGATSNAQPQQPQQQTGSLFGNTQNQQQPSLFGATNTGNAPNLFVNTQAQPGGGLFGQNNAQTQNQGSGGGSLFGGQQAQQQQQQPGTSLFGSTNTNQPQQQQGTNLYGAPAQQTQPAAPGGLFGSKPAGSLFGQGGLSINTNTSQGNNTNSNSLFGSVGQSTQQQQQQQQQQPAANNIFGQPQQQGGQTSFGSNLGQSTIGNPTNSLFGGSNLGSSTLGNLGQSNLG…
PC9H_000467	CDS	scaffold_1	1417838	1418602	+		hypothetical protein		PF00383;PF08211	IPR002125;IPR006262;IPR016192;IPR016193	ENOG410PPBI	F:(F) Nucleotide transport and metabolism		GO:0004126;GO:0008270;GO:0016787;GO:0003824;GO:0009972						MFVPLRMLWNLFMELRISLLMPPSDSGLSEFDKHRLSMHAFKAKEKAYHPHSNFSVGAALLCTDGQVITGCSVDNAAYGVSTCAEQVAIVKAVSEGRRSFVGLAIVSDLSVPITPCGVCRQVLAEFCDPGMPVPLLANHSLNPDNNSRGMKEVTIGHLLPFGTEHTQAWESRRIPDVPNDLHSL
PC9H_000468	CDS	scaffold_1	1419170	1421928	+		hypothetical protein	EOG092R04RH	PF00400;PF12894	IPR001680;IPR015943;IPR017986;IPR024977;IPR036322	ENOG410PI7A	B:(B) Chromatin structure and dynamics;L:(L) Replication, recombination and repair		GO:0005515						MRFRTLEIRWHDSKPISTCDFQPVSYKKARPGPKQERNYAGQSYRLVTGGEDNHVMVWMVHPNIRPTCIPDSEIVPRPPRIEYLSTLSRHSAAVNVVRFSPNGELIASAGDDGMIIIWAPSAHPAASTYGSDLSPEELQLEKEHWKPRITFRCTTMQVYDLAWSPSGEYILAGSTDNAARVFAAADGKCVHEIAEHSHYVQGVAWDPLNEYIATQSSDRSMHIYRISTKQGTFEAHAVGRNTRLPHQRHSRTPSSHGHSSSRPRMFRRESTASDAESVASEYLKDDVPMASSSSQYSKDATPLTPATSVASMPSTSMFPPPPIDKPSSRRSSFSSTNAPGSPSTFSRYGRSPSPMPALPAIRTLPSAAAWSQVKLYGDESFTNFFRRLTFSPDGGLLLT…
PC9H_000469	CDS	scaffold_1	1422228	1423409	-	ATP3	atp3 gamma subunit of the F1 sector of mitochondrial F1F0 ATP synthase	EOG092R0I91	PF00231	IPR000131;IPR023632;IPR035968	ENOG410PH2F	C:(C) Energy production and conversion		GO:0045261;GO:0046933;GO:0015986						MLLRSSLARIAVQPTLGAAPAGARNMATLREIELRLKSVRNIEKITKSMKMIASTKLAKAQRAMQAGKEYGLANSEVFKVATDDKSSARRLFIVVSSDKGLCGGIHSSVSKATRRAISNATDSPFATAEGSSVTIEGDSPVMVIGDKSKMQLIRALPQNLVLTFNQIGRDIPTFADAAGVADLIIKSGVKYDSVVLVYNKFVSALSYEAAIMEVKGAEALKESDGFKAYEMEDDFTGDLAEFSLANAVYAALTEGHACEQSARRNAMDSASKNASDMIGSLQMQYNRGRQAAITNELVDIITGASAL
PC9H_000470	CDS	scaffold_1	1423567	1424872	+		hypothetical protein	EOG092R0N4K	PF01873	IPR002735;IPR016189;IPR016190	ENOG410PG7A	J:(J) Translation, ribosomal structure and biogenesis		GO:0003743;GO:0006413						MASEEPLFDPSLKKRKKKAVAFTEDPLGADADPTAPAPETIESTTTNGDVVDLGPTTAHEQMKLNGEDVAGGEPPVDDDFKAMFGDLKKKKKKKEIPMDLDLGTDSGTSAPAPAPAAAATEDLDFSDIKKKKKKSTKTKYDLEAFEKELNDSKAKTAEEEEEDVDAAANPNLDHVDEAELGENPFAQADAPVGVDAGNEAWLKSDRDYTYPEASSLKLLTRFYASLHAANPSLLSASSQKRYTIAPPSIHREGNKKSIFANISDICKRMHRQPEHVIQFLFAEMGTTGSVDGAGRLVIKGRFQQKQVENVLRRYIVEYVTCKTCKSPDTLLTKENRIFFMSCESCGSRRSVNPIKSGFQAQVGKRSKNKTG
PC9H_000471	CDS	scaffold_1	1424984	1425599	-		hypothetical protein				ENOG410Q4BR					3 (o12-34i64-84o90-109i)				MSICAPSNINLLWAIWVPSAVFESVLAVFVLWVAGKHMKFTKGLSSNQDKGGTAIWTVLLRDSILYPLITVSLYVTNAVLWSTLPPELVQLPEAAVSCAACVLGSRLVLNLRETYYTPFTDEVNIATEHQSDIQLNDLPPPEDDPEIPALTLTTSGDVENQQYLAEL
PC9H_000472	CDS	scaffold_1	1427586	1429884	-	HXK1	hexokinase A		PF00349;PF03727	IPR001312;IPR019807;IPR022672;IPR022673	ENOG410PG3C	G:(G) Carbohydrate transport and metabolism		GO:0005524;GO:0016773;GO:0004396;GO:0005536;GO:0005975;GO:0001678;GO:0006096						MPLSRRGSGSITLASGQTLAIHTRTHDEEDLPHATKKTMADHLRKYEALFTLTPQRMRMIVEAFKEALELGLEKPSQVVPMIPTFVFGWPTGKETGDFIAVDLGGTNLRVCLVTLQGDGKFEITQSKYRLTEEQKQDDGQKLFDFCAECLRTFIDTNSSEPDGVLTPGEILPLGFTFSYPCTQERIDHGVLIRWTKGFGSPNTEGRDVAAMFNESIEKYQLPVKLTALINDTTGTLIASHYVNPRTKIACIFGTGCNAAYMEHVRDSDKIKSMGITDDVDMAINCEWGAFDSFVHEHLPRTKYDIIVDESSNKPAEQSFEKLISGRYLGEILRLVICELVDEGVLFLGQNTYKIEKPYVIDTAFLSLMESDPTDELLMIIGIFNHFFALETTLAERQFF…
PC9H_000473	CDS	scaffold_1	1430054	1430952	+		hypothetical protein	EOG092R0QEI	PF00238	IPR000218;IPR005745;IPR019972;IPR036853	ENOG410PPNT	J:(J) Translation, ribosomal structure and biogenesis		GO:0005840;GO:0015934;GO:0003735;GO:0006412						MIGLKSTLNCIDNSGALLVECVNVLKRKVNNGWGTVGDEIVCVVKRARPINAATQASVTAVKVRRGDVRRAVIVRTRKAVRRPDGRLIRFDDNAAVLLNNKREMLGTRIGGMVNADLRMKGWGKIVSLAPKPKKRPSKADLQLFDPLHKLPLC
PC9H_000474	CDS	scaffold_1	1431173	1434055	+		hypothetical protein		PF04082	IPR007219	ENOG410PR77	S:(S) Function unknown		GO:0005634;GO:0003677;GO:0008270;GO:0006351		2 (o456-474i515-533o)				MMYVGQCSWGAEGAKKPSAIQYVESLKKRIRALETYARELKSKVDNCRCEQRGVNDVEPSESILQARPDIYLPGDLDLDSDSPEPGSDTDNELLYPTSNLVLEDRDLLFHGTTSIFRHSTPQRMSRFPEIIENHKQCYVLMVEGGDQSHYNPNFDWSRYLPTAVPLDRREHDRILDCLFKFFTSWCLRIVPALFLRDMWRALSVPVSQTPPKTSHYSPMLHNALIALASAFSDDPRVRDLKARRYFASEAKSYIDAECQMPNICVVHALSILASFHSAQGEQTLGYTYFGERSHWILSVTLGLGVDCSTWVEAGIISRDDRLDRNWGYWTTFSQDVCWSLYVGRDFCVPCPTNRENIPVPYVETDLDELPWHHAPSNIAPQAGYLSKTFAASCELLLIA…
PC9H_000475	CDS	scaffold_1	1435905	1436695	-		hypothetical protein									1 (o20-40i)				MRIPSFPSTRSLENIHVDINAQLLVVVAASLVLLVLFRAVSSIPRWLRLSSKSSLQVSSRDNEKASSGSEKQSREPSAKGFKSWRWSSGFGFGLELESFPIALNSTHKLGWTPPVLGSGAGVLNSKLFAAMPTENSPTAGHSQPAHLIQPKLAKNWFKQHGKNLRVQTESASAASRRTQNAFETPLPAVYQSVKPVSMAKMIMSRHVDLSSSNRGLASPYTAIAIF
PC9H_000476	CDS	scaffold_1	1437595	1440750	+	MRE11	meiotic recombination	EOG092R073C	PF00149;PF04152	IPR003701;IPR004843;IPR007281;IPR029052;IPR038487;IPR041796	ENOG410PG13	L:(L) Replication, recombination and repair		GO:0005634;GO:0030870;GO:0004519;GO:0030145;GO:0016787;GO:0008408;GO:0006302						MADSDHEGSPPPNTPAIQNAYAEDTIRIMLATDTHIGYAERDPVRGQDSINSFKEVLQLAVKHEVDFILLAGDLFHDNKPSRECLYRVMALIREYTLGEKPVQVELLSDPDEGKAAECSFPAINYEDPNLNVAIPVFSIHGNHDDPQGAGSEGALCALDMLSVSGLVNYMGKFDLPLAPAKPAGEREKEQSPQHGIAVRPVLLRKGKTRLGMYGIGNVKDARMHFELRSNRVRMFMPQDKEEWFNLMLLHQNRVKHGPQEYVPEGMFDDNIDLVVWGHEHDCRIVPEPVAGKNYYITQPGSTVATSLADGEATQKHVALLQIQGKEFQLTPIPLRSVRPFVIEEVTLLDVAEEEGFDIDDQMAITKYLKRKVNELIVQANTQWEQRNAQAIEEGEEGLL…
PC9H_000477	CDS	scaffold_1	1442012	1443729	+		hypothetical protein			IPR013211;IPR027589	ENOG410PKW4	S:(S) Function unknown			SignalP(1-20)					MARFLAFSLVFAAVISSAWTKEIRNPPRLQAYESGAVHNGIMDMKHRLWSAKEAAGAFNSARYSKIEDFTPCINGTAGEFRCNNIDLYSFYSHADLGSQTGQGSSSWGWVHEGREYIIIAQADGAAIAEVTADGKLDYLGRLPKTPEAAAAIWRELRVLDHWLIVGSEAVNHHVQIFDLRKILEITPEEKPKTFDPRTDITGLFKGLPVGRTHNIVINWDRGYVVSVGSQPRTSEFAAGLVFIDISDPSKPALAGFQADDGYVHDAQCLIYRGPDTRYVGQDVCYGYNEDTLTIYNVTDTANASIISRTGYEGASYTHQGWVLDPEWQQYLILDDELDEVNGAGAAADGNAVTYIWDVSDLENPKQTGLFKTPGVTIDHNQYIANGKVYQSNYGAGLRI…
PC9H_000478	CDS	scaffold_1	1444599	1445862	+		hypothetical protein		PF01764	IPR002921;IPR029058	ENOG410QDPJ	I:(I) Lipid transport and metabolism		GO:0006629	SignalP(1-17)					MFPRFSLLLALSVLVTAAPVEHSTPDKRAVSTLSSSELTSFAPYTQFARAAYCSTSKLQGWKCGDACNALPGFQPTLIGGDGNAIQIFFVGFWPAQNSVVVAHEGTDPTQFVSVLTDLNILTDPLDTALFPGVPSNVLVHDGFRNAHALTATKILAEVKKLLAANNSKKVTLVGHSLGGALAELDALYMTLNLPSDVAIKAMTFGTPRVGNAAFAELIDSKVPDFKRINNKKDPVPTVPGRFLGFAQPEGEVHILGPGNAVSCSGNDDATDAQCQIQTVPNVFEGNILDHLGPYEGISIGTIFCT
PC9H_000479	CDS	scaffold_1	1446160	1449179	-		hypothetical protein		PF00400;PF12937	IPR001680;IPR001810;IPR015943;IPR017986;IPR019775;IPR020472;IPR036047;IPR036322	ENOG410PJ7H	S:(S) Function unknown		GO:0005515						MASTSSPAIPSRPTPTPTQRQRPNRVLPSFLASATQPPHEPGSPIARSFLPFPAMADEELEVIDGDLFAVPTVDTITRPSSPTPTDFSIISPDEYAHVNPDGPHSHQNGFLPQYQNSRYPYAYTYHYGQSRRSPWPFYSSPSLGSAFVGMGLTGRPEAPPPPQNQGSLRSIFPRIRDALSPARSPSPSVYPYGTTRPRFPHTSSSGSIFTSSRANQSTFSTMRYTPSPGPSPSRVSPKPSAPYTLSKGKETLSKGKARLLACHKALSSDSASGYSSYYHIDTNIDCIDYASLPPLDGEEGELVDEACYVDSRAVTGVDILALLPTELAIYILALLAHTPSSLPPSTFTSTSRGAGNEGNDSSYGNLQSILACTLVSHTWNRLANDNAVWRSLFESMSGN…
PC9H_000480	CDS	scaffold_1	1449352	1450872	-		hypothetical protein		PF01370;PF16363	IPR006368;IPR016040;IPR036291	ENOG410PJX0	G:(G) Carbohydrate transport and metabolism		GO:0008446;GO:0019673						MSAQDAAQIPAITKLNLPTPEEYQKRKVALISGITGQDGSYLTELLLDKGYQVHGIIRRSSSFNTGRLHHLYEDQHERPNKFKLHYGDLSDSTNLVYIIASVQPTEIYNLGAQSHVKVSFEMAEYTGDVDGLGTLRLLDAVRTCGLQNHVRFYQASTSELYGKVVETPQSETTPFYPRSPYGCAKLYAYWIVVNYREAYGMFACNGILFNHESPRRGRTFVTRKITRAAADISLGKQSCLYLGNLDAQRDWGHARDYVEGMWLMLQQPSASDYVLATGETHPVKEFVNKSFNALGIQLKWEGSGVEETATNVATGKVVVRVDPRYFRPAEVDLLLGNPAKAERVLGWKRKVDFDSLVAEMVEADLKSAKSLVEDQN
PC9H_000481	CDS	scaffold_1	1451058	1452526	-	TSTA3	GDP-L-fucose synthase		PF01370;PF16363	IPR001509;IPR028614;IPR036291	ENOG410PVTY	G:(G) Carbohydrate transport and metabolism		GO:0050662;GO:0003824;GO:0016491;GO:0009226						MTDSNPAVVLVTGGSGLVGKGIEHIINTEPVGSRFGKRPNETWIFATSSEADLRDPEQTRKLFDKYKPTHVIHLAAMVGGLFKNMKYKLTFLRDNVLMNDNVLHTACERKTQKVISCLSTCVFPDKVEYPLDETKIHLGPPHSSNFGYAHAKRLVDVQNHAYKEEFGCNFTSAIPTNVFGPHDNFDLEGAHVIPALIHKCYLAKKNNTPFIVAGTGKPLRQFIYSYDLAKLFIWQLREYDDVEPVILSVGEDEEVSIKDVADAIVKAVDFKGEYAFDTTRADGQFRKPASNKKLLELMGGFEFTPFDQALAASVKWFLDNYNNARTGNV
PC9H_000482	CDS	scaffold_1	1453506	1454744	+	FAD1	3'-phosphoadenosine 5'-phosphosulfate sulfotransferase		PF01507	IPR002500;IPR014729	ENOG410PK1V	E:(E) Amino acid transport and metabolism;H:(H) Coenzyme transport and metabolism		GO:0003824						MDYRRIVTQVYELAESSTDPLGPLVREALQVIDEGIERHGQGNIAISFNGGKDCTVLLHLYAGALIRRLPSSEAPKPIPSIYISVPSPFPVLEDFIVEAAKAYNLDLFHCHPTLTDSEPTDYVSAAVPPPKAVGKARGGEGMKRALEIYKQKFPHITGILIGTRRSDPHGARLSHRNMTDPGWPQFERINPIINWGYSDVWDFLRRLEVPYCQLYDQGYTSLGSTYNTFPNPALLMQPTCSTSPESRPDALPNGTSDGGEATDLLPPTLVDADGLEGSNLKPAGLPDRDAITPRYRPAFELVDEHLERAGRGIVDPNIQIVSTKSAA
PC9H_000483	CDS	scaffold_1	1454803	1456271	-	YTM1	ribosome bioproteinsis protein ytm1		PF00400;PF08154	IPR001680;IPR012972;IPR015943;IPR017986;IPR019775;IPR020472;IPR036322	ENOG410PHJB	J:(J) Translation, ribosomal structure and biogenesis		GO:0005515						MASSSNDSSRVSHPVVLSTQTPYPLPSQKFMIPANWKRYQLSQLINKALSLPKPIPFDFLVRGEVLRTSLGEWCAEHGLLEEETLEIEYIQSVMPPQRMSDIPHEDWVSSVSCGLQGHFVTASYDGYIRTFDYSQNMVANRQLHAAPITSVCVFPSDPTLIATSSQDLTAQISRIDSAAVQPLATLHLHTSPVSSIASSPSGKHLITASWDALVGVWDTSIPSSDEVAADLVQAERKSKKRKVDEADRPKRKAPIAVLKSHTARVSKAIFTGDKNAISCGFDSTVRTWDTEIGICTNTIIASEKPFLDLAILQNGNTALAASTDRTVTIYDLTADGASLSSTVGTLVHPATPSCIALSPRSSSSQQIATGSYDGVVRIWDLRSTKAAISSFKAWENKGK…
PC9H_000484	CDS	scaffold_1	1456606	1458000	+		hypothetical protein		PF03151	IPR004853;IPR029666	ENOG410PSZY	G:(G) Carbohydrate transport and metabolism;O:(O) Posttranslational modification, protein turnover, chaperones;U:(U) Intracellular trafficking, secretion, and vesicular transport		GO:0005794;GO:0005457;GO:0036085		8 (i12-31o43-67i79-99o105-125i132-150o156-176i197-216o236- 259i)				MPHQNEPKSSKLLVTGVVSFYLVAALAMVVANKKVLNETTTPLFFLFCQLFIAVILFLASDALRLLPDRLTFDINTCKGLVPMVSLNVVGLSLSNYTLAHVDASFYQVARGLVLPFTVVATLVFLHSTPSVRIILACSLVTAGFFVGVFLDGVRPSMVGVAFGVASSLITAVHSVVIKKSLAVVNGSALMLSWYTNLLSAIVLIPILILVGEVPGIMKLLVGEFTGVDGTTSPLKIFLWGSLITGCLGFLMSIASLLSIKVTSPITHMISSAVRGVAASMLGKWYFGDIITTGRASSIGIILLGSAYYTWVKHQESQTGAKGSEAPQASSRDGRGSYERVKMDELDLEAAKKETKPE
PC9H_000485	CDS	scaffold_1	1458177	1459824	+		hypothetical protein		PF00107;PF08240	IPR002328;IPR011032;IPR013149;IPR013154;IPR020843;IPR036291	ENOG410PFVV	Q:(Q) Secondary metabolites biosynthesis, transport and catabolism		GO:0016491;GO:0008270;GO:0055114						MKAARYYGPGDIRIEDIPEPQAKPGQIKIKFGRNGICGTDLHAYLQPLATAPTFTKPDYLSGETLPVTLGHEFSGTIVEIGEGVDSKFAIGQNVCVEPIISCMSKENCRACRNGSRNICPHLSFIGLSGFGGGLAEYICSDALVVHILPENMPLEIGATIEPLAVAYHAVKRSGYKKGDTALISGAGPIGLFLLKVLRSIDPTSTIVVSEPAAIRRQFALKHGATIAHNPLEKDIVSVVLEATGGEGVEKAFDAAGIQPSIDACLGSLRSRGTIVLVALWEHPAKIDPMTILLKELFLTGVVCYDREHPELLKEVAAGKFPNIEDLITRKIALADLVEQGMEVLVKEKDTQVKILVHP
PC9H_000486	CDS	scaffold_1	1460019	1461624	+		hypothetical protein		PF00107;PF08240	IPR011032;IPR013149;IPR013154;IPR020843;IPR036291	ENOG410PFVV	Q:(Q) Secondary metabolites biosynthesis, transport and catabolism		GO:0016491;GO:0055114						MKAARYYAPGDIRIEDIPIPSLKDGQVKIRIAWNGICGSDIHAYLAGLPKFPTLTTPGPLSGETLPVTLGHEFSGIIVELGAGTDGRFAVGQNVCVEPIMACRREGSCWPCHEGFHNLCPLVNSIGIGGWGGGLSEIVSVDQNAVHILPEGISLEVGACLEPLAVAWHAVKRSGYKVGDTALILGAGPIGLFLLKVLRAIDPNSIIVVSEPAALRLEVASQHGATITANPLESDIPSIITKATNGKGIDHAFDAAGVQSGIDLSLRCVRPRGSVMLVALWEASPKIDLNLVLRREINVTGSICYDRVHGEVLEALKDGRISGIDSLITSRIALDDVVEQGIKALIQEKDKQVKILVHP
PC9H_000487	CDS	scaffold_1	1462402	1464691	-		hypothetical protein		PF00732;PF05199	IPR000172;IPR007867;IPR012132;IPR036188	ENOG410PHJA	E:(E) Amino acid transport and metabolism		GO:0016614;GO:0050660;GO:0055114	SignalP(1-26)			AA3_2;AA3;AA3_3		MLTFIITISLGACLCLLAFLPTPARAAIYENISELPGRRFDFVVVGGGTAGNVVANRLTEDPRFSVLVLEAGPSNVGVLDSEVPGFYGNLFSPGPYNWNYTTVPQEGLNGKSMGYIRGFMLGGTSSLNAMFYTRGPADDFDKFAKVTGDQGWSWNNVQPFIRKNERWTEPTDHHKTRTQFDPRFHSFTGINAVSLSGFPHSYNDRVIQTTKELPGEFPFNLDYNSGNPLGVGWLQATIKSGVRSSSATSYLAPKYVKRKNLHVLVNARVTRVREGKHSKVFDTVEFMSQSGNGPAVSVTASKEIILSAGVFGTPQLLMLSGIGDTNELHALGIRTTHHIPSVGKNMSDHPGLFSSWSVNATKSTDEDLLRNATLFAKAFKQWNRTHSGILGDPTVTHLG…
PC9H_000488	CDS	scaffold_1	1466209	1467508	+		hypothetical protein		PF15906	IPR001841;IPR013083;IPR016818;IPR031790	ENOG410PGRC	O:(O) Posttranslational modification, protein turnover, chaperones		GO:0061630						MTKHSKNNTASSIFSYAEYKKLDYGTKKQRLGNESMRRFDACALCLNRAREPLACYEGHLFCKECVYTDLLTQKKDIKRQKERLENLKKEAEAERQRAKEAARERVLLEFEKGQLGLAATSTTGTTSGVNSEGRGTKRKFDFDVSKVESLAQEAEESALLQIEKEQAEALRNKLPDFWLPSLTPTYTSSGPPRSLQDVKLQTTCRGGNPSHTLSLKQLVPVKFSYQTPSASLGSPVGNGELSSQKEERDPMCPSCKKGFSNSVLMFLTKTCSHVTCKTCTDTLVRPAKQCIVCDAQLKDGDIIELKREGTGFAGGGLAESSRAGIAFQG
PC9H_000489	CDS	scaffold_1	1467721	1470727	+		hypothetical protein		PF01055	IPR000322;IPR011013;IPR013780;IPR017853	ENOG410PKMC	G:(G) Carbohydrate transport and metabolism;M:(M) Cell wall/membrane/envelope biogenesis;O:(O) Posttranslational modification, protein turnover, chaperones		GO:0004553;GO:0030246;GO:0003824;GO:0005975				GH31		MFGNLLQVWAGANAVLTSNSTYFQPNSTGIRLQNGFERVFIQPFGNHGMRVRASLMKDPTGQELSALLDPPLEGPGGGQGLSHDIELPFQGNATIRNGDLITEVSNGFISFFRAESNGSRTLLTAEYMDTKALQPRYYIQDFRASSFEAQFSFTSTPEEQIYGTGQQACCDDNSVNKKGQVVDLINYNSHVTLPVYMSNKGYLHFFNMPSQGRMEFSPLRTRFVASEASVVDYYITTATPGDYDALQQQFTSVTGRQPTPPDFLLGYQQSKLRYFNESQVLDVAQRFHDEQVNVSLIVVDFFAWKFQGDWSFNPEFFPDPEGMAAKVKELTGAEMMVSLWPSVEDLSENYLTLQHNGLLATTRDGPGVQDSFAGVYTRLVDSTNPAAREFLWRRLNDSY…
PC9H_000490	CDS	scaffold_1	1471108	1471650	+		hypothetical protein													MFRNRGSNTGKVQGQVNNANHGNGTFNNVHGQQNFNNGDTHHGDTYGGDHYAGTIHGGNVGGRGNKNAIYNSVAVDPPRHDTNPRPSTRLQQLQAELDDLNLKIEQKMVEMGMNEEQRLQRMVEELGATYRILQREADKPPRA
PC9H_000491	CDS	scaffold_1	1473745	1474512	+		hypothetical protein													MPTSSPVSPNNPFRPNAADRTDGQLISRDLVPQSSHVQSTALQPIPSRPVALHANTNPSSRVTSPAPALPHMPNSYPPPGETHNYNNSAGVFNQVNGDQRFDYNTAHNEHIYEGDTFAAPIHGGNVGGRNNQNAIYNGSAAVGPPRRYGGNPNMRAFETKADTLQSEIDRLMDELGLNEEQKLERKILDLQLTLRALQREVQVAAQRPESALSHDVGYA
PC9H_000492	CDS	scaffold_1	1475317	1476044	+		hypothetical protein													MSPNPFRRFADRRKSSKRQTSSPPAQAIEPVPPPQIQEPQAAAQPSPLLQQPEAAEPPPSPPTLQQDVVAVNQHETANNNNSEGTFNHVNGNQNYDTSTAYQGDVYEGDYFASSIQGGNVGGRGNTNAIFNGGSSFDLPRRGSGTARSEIRGLEAKAEYFQSEIDRLMDEMGLSEEEKLERKITELQITYRTLQREAASPRSGPGQDDY
PC9H_000493	CDS	scaffold_1	1476412	1477637	+		hypothetical protein													MYHHGSNQDGEPFVIWSTAWDTLPRFNSGHRPIQESPSPPPLIGDDITSDEGTETDRVSDTALDNGQYVIYETCGVAIHDEACPGVSASTGDVFPHISQGGLNDKSRPDDDLSFQALLDQDRVLRDLTWLAAARWDEFERPLTHMINRWLALPPKTLAKVLFYHATRNSSYAAPLTTLILLICKYGAVRHGVTYARDVRAAIEIVTVEAVEDYWLNGNRLTSVVYFHMGLHLQRYSVNISAFLGAVLGGGIVPMQLLFPVVHNILPSQPRSSMAANDAERAEAIYTLLSYVVRRLCVKEKKSGCGNERILENRKSLKRVSAYLLQELGYSARGLSSTSDHLNEKTRSRYFASLSAVFIISGISNQCRRIFFTFFATLTPEIHRSLSLA
PC9H_000494	CDS	scaffold_1	1477930	1479590	+		hypothetical protein			IPR032675	ENOG410PRWI									MAHLPLELFPVIFQNILKPSQLATCCLISKAASAFAVPLLYDRILIYAWHKGAKIRVVQVFNTLAKRPNLARYVHSLELRDFPKGPEISVYGVAVFLRALDNCINLQRCIWTRDGSLNNEILKSLSALPQLRSLTINGHSARFYDARCLLNIRGLCDICVIMPSAEVVRVLVEWTELNASTLRGLEIICKTSPLITDEHLGFIASSCINLERLRLVGCSKVSHDGVSSFLPSNRIPMVELALEGLSPNFKWVDLSLKSSNNLTRMRSITLSMGGEAESDFGEWVDSVATLLHDAPLEEMQIYSTGPRLGNSTDNELWSRLITPHAARLTRFSVHRMLLLPNTIEDICRRCSRLEQLFIAVPYAIFDSLGPLLASAKSLGTLHLNFPQTFGDPPLVPLDK…
PC9H_000495	CDS	scaffold_1	1479660	1480673	-		hypothetical protein		PF01965	IPR002818;IPR006287;IPR029062	ENOG410PRHT	V:(V) Defense mechanisms					C56			MPSALILMADGTEEMEFTIPYDTFVRAGISCTSAFVPAPDTDGSEPHAVSPPFCKGSRGINIQPDTYLEKHKCGPDHFDLLVIPGGAKGAETLSQSSVVQELVRDYLDHDKFVGMICAGSLAASTSGLPKQRLTSHPSVRTQLEKDFDYSEDSVVISGKLVTSRGPGTAFPFAFTLVELLCGIAKREEVRSPMIFPLSTPF
PC9H_000496	CDS	scaffold_1	1480859	1482958	-		hypothetical protein				ENOG410Q31E					1 (o639-661i)				MEDSLSNPASSSSTVFIIPSTADLSNEHERTPSPPLTRHPHRPPSPVLDDPPSPPDSPSLTDPGSVSSLPSVSSSFFFSSAAATPPLPSEPHSLDSLPHVQGHAVHTRPQQDHHSDTDPQSQSTRHLIIPSLSLPAALRRPTAYGQSLGDVRVLVMKLSDTDNDLLGHSADPGLDIGRLLVENNEDIVDVGGWEPFHPQQSRSDEPLNSDPASWRILRASTDWIEHQDAYGLEKYEPSRNIEIIEVTIRLPHPHSLSYDSEYESSEQLIRSTLTNTLTELQSFLAYPFRELTDVLSPSLPPYTSSLVHNLLAASGSPLCVGLVLLYDLYHGDERSALLGPRQRARQAFDPRVAVAEHIITESLSSYVPVIKLPSTAAATMLYPSIPQSTLTRRRDPTHT…
PC9H_000497	CDS	scaffold_1	1483114	1486939	+	SPT5_1	transcription elongation factor spt5	EOG092R00GS	PF00467;PF03439;PF11942;PF12815	IPR005100;IPR005824;IPR006645;IPR008991;IPR014722;IPR022581;IPR024945;IPR036735;IPR039385;IPR039659;IPR041973;IPR041975;IPR041976;IPR041977	ENOG410PFCB	K:(K) Transcription		GO:0005515;GO:0006355;GO:0006357;GO:0032784						MSDFDNDFPAEGDDSMMDEAGGSYEAAPGHPPKARRADYDDEEEEEEEEEEEEEEEESGRGRKRAKHRHKRSFANEFLDIEAEVTDEEEEDEEDDDFGGPDGFIEAPQEGDEDDLQHRSRNALLDRKRDQDFDDGDLERIAEDLSKRYSNNRAIRYSGDMNDIPQRLLMPSVNDANLWQVRVKPGKERDIVLSLLRKSIDLEYTANPLNILSAFQRDSLPGMIYVEARSAQQVNKACTGLVGVYPSRGIHLVPIEEMASLLQIKKQDLTVTPGSWVRIKRGKYQGDLAQVMDITENGEDVGLKFIPRIDLNPRDESSLDGRKRKKPGIVGAPNMRPPQRFFNYEEVIKVYTRKAVAKRNQVYVFQNETYKDGFLEKDFKLSALSLDDVNPTLDEITRFT…
PC9H_000498	CDS	scaffold_1	1487750	1489982	+		hypothetical protein		PF00732;PF05199	IPR000172;IPR007867;IPR012132;IPR036188	ENOG410PHJA	E:(E) Amino acid transport and metabolism		GO:0016614;GO:0050660;GO:0055114	SignalP(1-18)			AA3_2;AA3;AA3_3;AA3_1;AA8		MLLSISSLLALLLPTVLGAIYESASELPSHNFDFIVVGGGTAGNVIANRLTENPRFSVLVLEAGPSNIGALNSDVPGLETNNLPLPNPHNWNFSTVPQAGLNGHTVNYIRGFILGGSSAVNAMYYTRGPADDFDKYANLTGDQGWSWNSLQTYIQKNERWLEPTDPLTAKDRFDSRFHSSTGMNFVSLNKFVHTTDSRMIQTTKDFPEDFPFNLDYNSGNPLGVGWLQATIGNGVRSSSATSYLAPEYTARKNLHVLVHAHVIRIREGISRSKRFSTVEFMSQSGDGPTVRVTASKEIVLSAGAFGTPQLLMLSGIGDTQELRALGIDTVHHLPSVGKNMSDHPKLGSLWSVNSTLTDEEFFRNETLFQEVYEQWNRSRSGLLADAGATHLGFFRLPSN…
PC9H_000499	CDS	scaffold_1	1490263	1491259	+		hypothetical protein		PF14304;PF14327	IPR025742;IPR026896;IPR038192	ENOG410Q477			GO:0031124						MSDQSATLATNQLLELLLQLKKAGPAAARQILNSQPQIAYALITLMVSMNAVDFGVFHKTLAEFTPPSGSNSTSTAATAPVHAGGAPQAQAGPSGPPAIPAHLQPSTYGKAPVAQASYPPPHSSTPPVNTYSSGYRGNGTPPTAGPGFGANQYSSYPPVAPGSGDGSARGGYGQRSGPPPGYGQPPSAGHYQPPPTSYPPPSASSYPPPVPGIASSPSQGPPTAPGNVPGLEMILANIPDDQKAMIMRVVQMTPEQIRALPAQERAGFNQLRATLGLPTG
PC9H_000500	CDS	scaffold_1	1491828	1493172	+		hypothetical protein			IPR008979	ENOG4105DN8	S:(S) Function unknown				1 (o23-41i)		CBM67		MVWAGEEFGPFSLWPHLPDCPRIAVILPFVGLFAAVIVAATPSSQLCTREQSFTDSTPGCKNTATPHVFQPAFLNVSKWIWTGENPTPGGNNIISTRPLRKNITTPCDKCAICATIVVASDDAHTFYVNGVRIGAGGDFKQGQALFVALQPSWNLFAVAGQNTIANSPAGVMATILIHYTDGTSATFITDESWRTLEAAPPTNFQLASTDDSSWAFAAIQGTFENSVWGQPTLPPVLPLSGSKWIWTSNTANTGAAVASCAFRKTINQCAKVAVCATVLIFADDHYTLYVNGASVGSGSFAGGAAIAYTIPNLLPTLNTFAINATNDVGSAGLVATILVTYQDGSNETVVTDGSWKATLTVPQGFESPTFDDSDWPNANVVGAYGIAPWGTGLAIPSA
PC9H_000501	CDS	scaffold_1	1493469	1493972	+		hypothetical protein		PF17050		ENOG410Q404									MSALIGPISGALVAGGVYYGISNLIHTRTEQQRRELHTLSVRLTETPTFVNAPPSAASRIEHRPFASLIKGKWNDEIDNLVAGLRSLDERAISYGKKLLYNSTTPPKTS
PC9H_000502	CDS	scaffold_1	1494125	1497299	-	BRO1	bck1-like resistance to osmotic shock	EOG092R04EG	PF03097;PF13949	IPR004328;IPR025304;IPR038499	ENOG410PGNU	U:(U) Intracellular trafficking, secretion, and vesicular transport		GO:0005515						MAHQSPMISIPKKTTEEVDWTTPIRNLVAQSYGESPDNYAAECASLQRCRQDAVRGAGSDMTARDLLYKYFGQLELLELRFSEIRVSFPWHDAFTNKLITQTSIAYEKASILFQIASTHSAIAASQNRSDPEGLKRAFYYFRTCAGMLTYINENFLHAPSTDLSRDVVRFLINIIIAQATEVFFEKCTDEKKGSALVAKIGAQAAALYTILTEDVKEFMGKGIFDRNWVTLLQIKSKYFSSLAQYHRGLADSAAGKHGDALVRFTQAESLAKEASRTAATFGSVFVTNMSPNLPADAGSSIQERTKAHLAICSEKKAEATRENDLIYNAILPSAEALPVIDKLSVATPISIQDVYGSPEVQKVIGPDLFVRLIPLSVHESASVYSEEKAKLVRGEVENA…
PC9H_000503	CDS	scaffold_1	1497473	1497968	+		hypothetical protein			IPR007512	ENOG410PQM9	S:(S) Function unknown		GO:0061617;GO:0005743						MSTSKPSSSEDIVGQKLSTCNLALNNEPAGRTWPIALSTGFGAGAAYADCDRSFNPARIPGTRIISQTELEKTAAPSSS
PC9H_000504	CDS	scaffold_1	1498467	1499860	+		hypothetical protein		PF00293	IPR000086;IPR015797	ENOG410PGN3	L:(L) Replication, recombination and repair		GO:0016787						MSVSSDRLLTLLDLVNICDNVHIRRPSPTPHEFDAELLIPLCLSATPSSPAIGLLRPILIDQLLKENRTSAQLNKPPLWDIRIDTKDLSKPFVHRTDGGTGALTPSVSFQPWLDTHAKRTAAIKELCERWRDTGVFPEVCGPKKWRSELYPVYKDPFGPHDHPSRIPSDQEVEKSNFAFEMERAACALFGVVTYGVHLSIYDVVNEKGKAETLRLWVPTRAKTKQTWPGFLDNTVAGGIPSGMGVFESLVKESMEEASLEEDLVRQHARAVGSISYFFRTDKGWLQPEIEYLYDIRIPDGVDHAPFVPKPLDGEVECFEFLDQEEVMKRLKAGLFKANCGVAIIDLLIRLGYVTPDNETDFMKIHTRLHGRFDYERW
PC9H_000505	CDS	scaffold_1	1499937	1501119	-	MDM12	Mitochondrial distribution and morphology protein 12		PF10296	IPR019411;IPR027532;IPR031468	ENOG410PI4S	U:(U) Intracellular trafficking, secretion, and vesicular transport		GO:0032865;GO:0008289;GO:0045040;GO:0007005						MSIELEWSNLDASLSSFLIQAINKQLENTTRPSFIGPVEVTSFDFGSAAPDIELIDLRDIYRDFLEDDEDEDEDDSSGFGRNGPVKVTEGPPMEDEEGFEWVSRRAAGREEMSRSYSFQQHLLPPHVRAAYDGPMSASVPSMPYMGMPLPFGHPWHGTGTPMFRSPTPATPFTPFRTPSGSSPNIPSHQANTERSQSNSNSLGTPPDDASKVPKVESVHPNLQLHFHVNWQSNLRITLTTSLLINYPSPMFMSLPIKLSITGLIFNGELAVAYEGERRRVHVCILDELDPYGPACDRPKRDSVERTNSYNSQPSPDNEDEHPSLGTPPRPSKPLPIGQRLLPSIYIESEIGQTDKHVLKNVTRVERFIQDVIRKTVEEELVFPNFHTLIMGEQ
PC9H_000506	CDS	scaffold_1	1501282	1502329	+		hypothetical protein			IPR000028;IPR036851	ENOG410PQGK	S:(S) Function unknown		GO:0004601						MGAIEKVFTTGFVLSWDVVLTLLNAILPKRKIGHVTPAGEAGAGGKWPEYIAPKDTDSRCACPALNAMANHGILPRDGRNITFKEMNRVIRATYNFAPSFCFFVPNYSANMLNKSYRKDTFDLEDISLHNGIEHDASMTREDVRHQPDQGKPHLPFVEELLSRATGKDAEGNAVLTIPDVAHYMAKRRVDAPRANPDFTTTKFHETFGASNSSTLLTIYGGRVDDLRPILVEERIPDGWESRIRAPFGLTMINFNVGTVNKVEKESQKEQKVYAASLDDSSIHKSPEATT
PC9H_000507	CDS	scaffold_1	1503110	1503891	+		hypothetical protein		PF02656	IPR003807	ENOG410PTFM	S:(S) Function unknown				3 (i88-111o123-143i164-187o)				MDRKRANTGSSSLTERDSLLATDTTSSGSTERTSFYAATSSRSCHSPVDPDPDTSAEEIDETHDCQSPTLLENSSSVARDHLASERTFLAYVRTSLAVVSAGVALSQMLIIQLNQHPHQRIGVFASLLGAACVSLGLAILFTGRSRYFAVQSALMDGKFPVSRLGASLIALALALLVVLTFIVIFVYQKDMLS
PC9H_000508	CDS	scaffold_1	1503962	1506674	-		hypothetical protein		PF13520	IPR002293	ENOG410PV5C	E:(E) Amino acid transport and metabolism		GO:0016020;GO:0022857;GO:0055085		12 (i106-126o132-153i182-205o217-238i245-269o289-308i329- 352o372-400i421-439o451-472i484-505o517-541i)				MYAPTLASDVVQLPEVQVLNEPESSVGTLQVPPPFAQHQWDTILRRQRSRPKDGKGVKSTSMPSIFVNLSNLFEFAGWGTFDNLTFAPEDLAHGKASIQAVRRDRILGQFTASAIAGNAVLGSVFYALPAVVAISSVYAPISLFVACLSMFLWRPIMEELGSALPINGAPYTYFNNVANKKAALICASILVLDFLSTAVVSAATATSYLSGEVALPFPAWVGAAFILVVFTFLSLTGVRESARLALAMLSFHILTMIVLMIAAAVHWAHTGNEMLRDNWNAGKASSSSGMAHQIFNGVCLGVLGLTGFETTPSYLAKMKTNVFPLVLRNLHYPAILFNVILMTSILAIIRLPDITSGANILSLLADKVGGPWLRIWIVVDAMVVLCGGVLAGFVSSCQL…
PC9H_000509	CDS	scaffold_1	1506876	1508069	+		hypothetical protein		PF04893	IPR006977;IPR039765	ENOG410PKFD	S:(S) Function unknown		GO:0016020;GO:0005794;GO:0016192		5 (i106-129o149-168i180-199o205-224i236-262o)				MAYVSVESDERMEEGPEGLEFKSFLGADPAAPNPNAGRSPGVGSADRGYLQDQPKGSSGFWQIEYYQPYFDVDTKTVIKRCYSTLIPSNSAYSTLLNPSPDLYGPFWTLTTLIFTLFLSSSLAASIASYMSEGEYDYNFQLLSISVSLVYAYGLGVPVALWVALRYLGVGEWSVVEAVSIWGYGQFVWIPVSLLCVIPVPLLRWSLVGVAFGLSGYFLVVNVYPILTMAEAKATRLLIVVVAVLHAALALTFKVLFFSYYVADAIGPDIPLPGSEAPADNSTLTTIVERMFS
PC9H_000510	CDS	scaffold_1	1508164	1509876	+		hypothetical protein		PF00899	IPR000594;IPR035985	ENOG410PHJR	O:(O) Posttranslational modification, protein turnover, chaperones		GO:0008641						MSLALNIHSQRFQLIATAVAASLVTAGALAAYNSVSKRERRRNLSEEVLRSVSNEASVHTLPDYSVYKEDASIREPPHEISLSSNFRYDEELIREQLARNYAFFGEEGMAKIRGGSVVVVGCGGVGSWAAVMLVRSGISKIRLVDFDQVTLSSLNRHASATLNDVGTPKVKCLERNLKQIAKWIDVDCRAEIWRKEEGGDLLEGVDWVIDAIDNISTKVDLLKYCHDHNLKVFSSMGASAKSDPTRIQISDISHTIYDPLARSVRRRLRLLGVTSGIPVVYSTEVPGDVKLLPLPEEEFQKGPVKELGFFDDFRVRILPVIGPLPSIFGLNIATYILCELAGKPILNPLPIKNRKKLYERLLRDLLHRESKLTGETINKLPIDEDDVGMIFEDVYLGRS…
PC9H_000511	CDS	scaffold_1	1510616	1512602	-		hypothetical protein				ENOG410Q3ZJ					1 (o614-632i)				MDSTDALNLLTPSSTSLPQYGFSDTTEFSRLFQKNPFLFRVYTPKERSPFADDTDPYFLAPKYNEAYSESPKNLSPVDSPTKSLLPAYAEVIRHLDWTTRSSSPFISTSFSFVWAIWEGLRRYHTNVKHDVHIAIINAEDVAHHAFTAAEILASARPAERHVKHRKWQQYCQESQMVLVYGSIPTTAVYNSVPLLDILEKLPSYFLHSENTPVYTAPFTTPLDRVAWNYTNRKLSYRQFCREMSTRFQQLPFETRLRDTTAGSVRLAAAFVSPWFHGTIPVDFSGSVRVLTKLALVISQWPGQWWSRDHYAEISHVVQAITVVLAEQVRDSLKSGALDNTLESWTLEEIPEGMQPTTFEMSPKTSAGQETISIAPTPSDAKLRESDSTDVPSVLESEEA…
PC9H_000512	CDS	scaffold_1	1513123	1514818	+		hypothetical protein			IPR032675	ENOG410Q3W4									MVSADNLNLDVLGLIFAFINSKYDQASIALVSRSFLAAVTPRLYAVLYYTFHEAKRYPTLMTPFATIISHPHLGVHVRHVDKPSLSNLRINGSMPTQAAQKLVQVRGLVKLAIDHGSWNLLDILPSWTSNLKQTLSSLTLSNCTEVNDAVLRPILADLPALTELNIISCSRFDHNHVLRLLHLTPNLEHLGFTLTDNSCTTDFLPFTLRRLRHLAFDTKCSTMASPLSSLVTIVMGHINSASPALTSFSAKLSDRLAANEFIEALVNEHGLTLRTLVFVGSPIAFTNALTRSFTLTTLVDLGDISHSVHSNQVSLTTDSAYHLMGHVRQLKKIVSGGRTWTGKRGQENELTVTLDRRRAYRPEKYWFQPRD
PC9H_000513	CDS	scaffold_1	1515062	1515722	-		hypothetical protein									1 (o172-191i)				MHRQSLTYLARAGRGSRKEHRPVVPKRAQAHTTAMPLESIEEATLPPIFDIFDAPHRLGESKLYGKASPSGSTSPQKYSSSMISLDNPFCDPMPLPSSLPPPIIFDGPARPRHPALEYASRARRSSSVRPYSMSTPSVTMSPADKPMVQLFEGPARIHRHAHHGPSSGQKQISYKSVMAGVAGLFGCITVAKNSEEKQRRR
PC9H_000514	CDS	scaffold_1	1519521	1522264	-	DUS3	tRNA-dihydrouridine synthase 3		PF01207	IPR000571;IPR001269;IPR013785;IPR018517;IPR035587;IPR036855;IPR041367	ENOG410PFC8	J:(J) Translation, ribosomal structure and biogenesis		GO:0046872;GO:0017150;GO:0050660;GO:0003824;GO:0008033;GO:0055114						MTSIYPLGTAPVKPEFLLQVNSGQSANVPDDDAAEGTSSHVQDRAGAGEDERSNVGPSRKKRSKAEKKAQRGANKGRRFGKIRDEVEVCWKVAAGQICEFGDECRFTHDIPAYLAAKPRDIRIPDTTQSLEVPPFIPPQDFVADAEYPSLDMGTICPVFAEMGECRFGLKCRFLGGHIRKSNGALEMISDTEKRAHAAISATELNFMSPEALKNLRTKKYNFPISSAYLKEIQTAEEKGKDTTSHAAAAATTENVGDDLPSTAIETIAERTGETATVTQVDTPDVPMRFNEKKRLHWSGKTYLAPLTTVGNLPFRRLCVAYGADITCGEMGLANSFLAGSKEEWSLIRRHPSESIFGVQLAGNKAATLVPTAETIAKECAGNVDFVDINCGCPIDLVFQ…
PC9H_000515	CDS	scaffold_1	1522603	1524449	-		hypothetical protein		PF00487	IPR005804	ENOG410PGFX	I:(I) Lipid transport and metabolism		GO:0006629		4 (i54-74o94-117i249-267o279-298i)				MRTSTITTTQAPSPKSTIYREDDLPAFTPMPWSLKEIRAAIPPHLFARDTTRGLLYFTRDLLMAAIAWSLASYIDPYFKGVAVRQLLTPFGAEIARWSAWLVYWWFQGLIFTGIWVIGHECGHSAFSEHKIINDVIGFVTHSALWTPYFSWKISHHRHHSNHASMERDEVYVPKTRSDLGIPPENSGHIDYEDYFGDTPIYTLFMLIRQQVLAFPAYLLFNVSGQKTYPKGTNHFDPNSVLFTKEQRNAVILSNFGIAAMVWAVTWASSTFGSANVLKFYGIPWLLVSHWFIMITYLHHTAPDLPHYRNKEWNFQRGAAATVDRNFLGWQGRFFLHDVAHFHVIHHFFPKMPFYNGPEATAYLKDFIGDHYHYSDKPVFKALWESYNRCQFVEDEGDIL…
PC9H_000516	CDS	scaffold_1	1524948	1526136	+		hypothetical protein		PF07859	IPR013094;IPR029058	ENOG4105F2M	I:(I) Lipid transport and metabolism		GO:0016787			S09X	CE10		MSSSFIPCPTTDDLSILDPDLRGIIALLPKTNETAESSDVVVQFMRSIPPRPHEDLNIVKKDILVSLEDAAPDQPPTSLRVYIPRNASPHDRLPVLMWSHHGGFFSMGPLRLDPFCSSIAVAANVVVVAPAYRQTPENPFPAPFNDAYQVLRWLTESSEVGQYLIDPTRVAVGGTSAGATITVGMFLRYRDEGRDISRIRLLVLEDGSYVNKSASYSTYHNPINKLWNANVTRYMWEMYLPQGVEGLDERTLGYAVPALAKDLSGLPPTMVLCAQWDDLTNDAIAFAHRLLESGVSTEIHNYRGTFHVADKLVHDAKTSIKKRQDIVDALQSLL
PC9H_000517	CDS	scaffold_1	1526858	1528579	+		hypothetical protein		PF00487	IPR005804	ENOG410Q493	I:(I) Lipid transport and metabolism		GO:0006629		5 (o45-64i85-106o126-142i242-259o271-290i)				MLNIFQDSPEYNKRKETPFLPSKVTLAEIRASVPKHLYNKSTVKSLLYVARDISCGLVAYKLALLIQPFSQALLLKGLDWTIVRLIKFALWATYWHWQGVIFAGLWCLGHEAGHGTMSPYGWVNHAIGYSLHTFLLVPYYAWRSTHHAHHKATSSVERDENYVPRTRTDYGLPPAHKAQARDYHEIFEETPIYTLLRMLAMQALGWQFYLFTNAMGSPSYPKGTNHFLPSSPLFKPHERNDIIASNIGLATMSTVLWIYTSNVGLSTFIKIYFIPYLLANHWIVMLTYLHHSDPTIPHFRNKEWSFLRGALATVDRPLLGWAGRFFLHNVSHDHIGHHLFSTIPFYNQPQVTEHIKRVLKEDYNYDSTNTFRALYRTFTQCCFIEDDGDIVFYKNKDGE…
PC9H_000518	CDS	scaffold_1	1530062	1532155	-	LCB2	serine palmitoyltransferase component		PF00155	IPR001917;IPR004839;IPR015421;IPR015422;IPR015424	ENOG410PG3U	O:(O) Posttranslational modification, protein turnover, chaperones		GO:0030170;GO:0003824;GO:0016740;GO:0009058		1 (n20-31c36/37o128-147i)				MAFRSSPSRSIFKKKSSPSLAPMTSAASYLSALSEADARARGLSKSPTSTPALSLSSSITESSEDTVLNELDDDNRDGLLFPSCAPTSEQVFTTVHTEFGHCSNEDYRYVSQHIPGATLEVVEKDPPYYILLTTYISYLILICVGHVRDFIGKRIYPGAYKHLMPHNGLAPLTSDFDSFYTRRLKQRLAECFAQPVTGVAGRTIVCLDRFSPDFGQSYILTGGRTRALNISSYNYLGFAQGRGGCADAVEESIRQYGVSTLGARMEGGSCDLHVMTEALVARFVGMEDALISSMGFATNSTFIPALVDKGCLVISDELNHASIRFGVRLSGASVRMFKHNDMKSLESLLRESISQGQPKTHRPWKKILLIVEGLYSMEGTLLNLPAILALKKKYKFYVF…
PC9H_000519	CDS	scaffold_1	1532556	1533303	-		hypothetical protein		PF12752	IPR024771;IPR039228										MPTDDPWDQEPPNTGLVVTRPSKQPQRQVVPDDWDDDEEEEDALPDPELNKKIWHEANTKAPMPEFLVKSSSTIVAPPASAFQPQLRILKRPSATPPASTSPSLVGARETVQQREAKYNAARERIFGTNEQGRDSEGSRNASLSSLQSAPPRDSVRRIDPTQSSTPPRTSVTRNPQGPADAGLTMTNADGSPVPRGFGRRIGDSKPVPQAGD
PC9H_000520	CDS	scaffold_1	1533411	1535329	+		hypothetical protein		PF01546;PF07687	IPR001261;IPR002933;IPR011650;IPR017153	ENOG410PHND	E:(E) Amino acid transport and metabolism		GO:0016805;GO:0016787;GO:0008237;GO:0006508			M20F			MPAPTEFLQFVDQNADAFIQRLSDAVAIPSISGDASHRKDVFKMADWLNDQLKAVGVETQLVDLGKHIMDDEELQLPPAILGRIGNDPKKKTVLLYGHFDVQPANKSDGWDTDPFTLVVHPTNGQLIGRGSSDDKGPILGWLNVLQYHFQTGKELPVNLKMCFEGMEESGSEGLDDLVKREGSGNGGWFDGVDCVCISDNYWLNTRTPALTYGLRGLTYFKLTVSGPSRDLHSGVFGRTVHEPMTDLIHLMGQLVSPTGKILIPGVDEMVPPPTEEEKAIYSGLDYSIQDIQDAAGAAIALSDDKVNVLMGRMRYPSLSLHGIEGAFSGVGAKTVIPAKVSGKFSIRLVPPQTPDAVNPLVIAYLQSEFAKLNSKNKLHIEDLHGGKPWVADHKHWNFE…
PC9H_000521	CDS	scaffold_1	1535603	1537388	-	UGD1	UDP-glucose 6-dehydrogenase 1		PF00984;PF03720;PF03721	IPR001732;IPR008927;IPR014026;IPR014027;IPR017476;IPR028356;IPR036220;IPR036291	ENOG410PJKA	G:(G) Carbohydrate transport and metabolism		GO:0051287;GO:0016616;GO:0003979;GO:0055114						MAPVKVQKICCIGAGYVGGPTCAVIALNCPDIQVTIVDLNQARIDAWNSKDFKLPIYEPGLEDVVRKARGRNLFFSTDVDKAINEADLIFVSVNTPTKKSGVGAGFAADLNYVELATRRIASVATSSKIVVEKSTVPCRTAESMRTILEANSKPNCHFDILSNPEFLAEGTAINDLLKPDRVLIGSLQTPEGIDACTALADVYANWVPKERILTVGLWSSELSKLAANAMLAQRISSINALSAICEATGANIDEVANAIGFDSRIGPKFLKASVGFGGSCFQKDILNLVYLSESLHLPEVAAYWRQVVDMNEYQKRRFAKTVVDTLFKTITGKRIAVLGFAFKADTGDTRESAAITLIKDFVAEKALVQIYDPKVEHEQIWLDLAEAIPGTPIEAIKKQ…
PC9H_000522	CDS	scaffold_1	1538065	1541163	+		hypothetical protein	EOG092R04B7	PF00176;PF00271	IPR000330;IPR001650;IPR014001;IPR027417	ENOG410QDFW	K:(K) Transcription;L:(L) Replication, recombination and repair		GO:0005524						MLEDSRLYPELAPRQPREVISVSSSATSSTGGGRSQARTPQVNISDSESESGSVSSDDDGDAAPSSRSSRPPATKTNTVNQGTIPLKKPVLPYFPTTDASRPNLPGAYIPAAGIPIRIPSNGASPFAAAVSNDAEPGELIDLPQQTYIGDFMANTDTEKALKELMSGSMNDEEVDIDMAEAIVKGFKENIRLLPHQVVGKKWMKEREDVTQKRYGGILADDMGLGKTIQALARIAEGRPRKSDKADGWDACTLVVCPLALVGQWADEIKKMCTQLEVLQHHGPSRPTDPNVLRRHHIVVTTYDVVKSEYAVYRPDVKDESKSKAKKKKAATSDSDDDVPVVKKVAKKGPKRDAIFRIKWWRVILDEAHNIKNHITKGAVACCDLDAKFRWCLTGTPMQN…
PC9H_000523	CDS	scaffold_1	1541299	1542682	-		hypothetical protein		PF12937	IPR001810				GO:0005515						MSATEAFAKPKIVWPELPTELWIRILRCATSLPEDFDLELVRGAFQVKYPSKSYREVLVTARKIVRVSKLWNDLATPFLYETLFIAKARQLVKLRASLHKSLGDTMPVDRYRVTGSQESTAGITPTRRQPLGFWVRRLVVTLQPPYTPNVDVTSEILDLISCLSGGLVALHLLVPLPDHPSRFVSPAFLHVLRTFHGKALRYLNLTTNQPDREVSLESWYDFLEKMNSLSALRCDVRCDHTRPDIFYKPHHLSVISIPMAEFMDPESPSTSVVNGIQELITTPRVPRVQLAPPDPSRRLNLHVPQFGNNLTTLTFDMHRFETQSGVSLDLSSLFPNLIHLRLSCRSWYGLYISPPLAVPPSVIHLRLSSLHYTSTNHYQYFYLGQILETIYFEGSSLKV…
PC9H_000524	CDS	scaffold_1	1542931	1545507	-		hypothetical protein		PF00443;PF02809	IPR001394;IPR003903;IPR015940;IPR028889;IPR038765	ENOG410PTY5	S:(S) Function unknown		GO:0036459;GO:0016579			C19			MAYNPSGASNSDQAYSSMENESVELLSAMMGGDIDLDLARRLLRKCNGDVQKAADALLEGTAKGMLEETAVIRRTGSLNTIRTDERPRSRTAGRPGTPVQPSVIDLTGEGEDDELSRALNLSMETHSNEQSTRVDRDQKSAPPDPAWAMVRSNEPTHSAMSQDDQSLSRAIEASFKDFAGVNEDDTPPLEDTIREGNRPVVLRTESPTLAYAALVLQALFFVPQVRITLSKLSHVLFDVQNEADRTILSLIELYAHMDLGALGALLGNDILCGFEAKPFNGPSDSPGELSSDFLKKAATFIDDYVKQLDENGDPKPFVSFRLFNFRHGSIVLSPAAPNGVGRAFGETSVVSVDVNCSRPSPNTLMSRLSTDLSEYVDGESKHDIIVEPSQVVVFGLKHG…
PC9H_000525	CDS	scaffold_1	1545778	1549059	+		hypothetical protein		PF10373;PF10374	IPR011990;IPR018834;IPR019458	ENOG410QDF1	S:(S) Function unknown		GO:0005515						MAESPAIISRKAKSLQQALKDILKNSDPWDKDVEFQRKDLRKKYLCLLLVHPYAKESKDAEAHLWMQTSYNFISVYKQRLATLDRAIQTAKQQQQQPRTGGSGPVVEHRKLTQRFRQFLAEEEKFWTQLIVRHRREFGLVQVQPHLVALGIEELPAEVQQEDAAAPEAGRRPSLFPPDDGPHPPSSNAERNSRLVIVSKALICLGDIARYRELYNDNRNKAGARRGRGGGPEPSQRPRNYDKAQQCYEKARILTPDIGNASHQLAILSAYQKDIFTSLTHYYRALCVRYPFEAASENFGTVLRRAYEQWRRSKREREKKHTRQGSSSVLPKIRVDNFKENIVLLHALWRLEPQRVDAEVPNHSQHVADDFMSLVAERILPPDMISKVIVMSEGALWKHR…
PC9H_000526	CDS	scaffold_1	1549278	1549915	-		hypothetical protein				ENOG410PU3R									MADVEIDNNPASELAAAVAAYSTYPFGTDEEFQQGLNSLMAGGALVGKTDEEKADVVRLAQIFYFNRKTSNNITVDAVRNYEQAHAVKPPVTPESDSNEPRVLSFAELQELIQSGRVDEIPNNRIIPDTLNEAPPSESKTPAKLKPWEKEASTDV
PC9H_000527	CDS	scaffold_1	1550061	1551934	+		hypothetical protein		PF01412	IPR001164;IPR037278;IPR038508	ENOG410PGVY	T:(T) Signal transduction mechanisms		GO:0005096						MSNPNKFATERNQRAVLELAAKPGNDVCADCKARNPRWASHNLGIFICVNCASIHRKIGTHVSKVKSLTLDEWTKDQVEFMRQNGNLKSNAYYNPNESRNPPPTRMMENERDSELELFIRSKYEHKRFIDKSALVAAKLGPSRPAPVPSQSSRAVSSPIVAGAPTLSSQSALGINRPSTSALLETSSIAARQPAARSASHPLPPSTVPLNQQYMKPMPPLPSEARPQHPQAPQPPSDNPVWNDLISLSQPTVSASLPLQMQSTPTQMPQFNAQPNQSFQPALSLNTGFPSNLQPSQFQGGPSPLAMNPVSSFPTSMGMNNTSYSTNQFGQQLQQQQQQQQPGMGYPNQPQAASYQTAMSTGMMSMGQSYPQQQQLQQQQQFLQPQPTSAMSMQSQGMLS…
PC9H_000528	CDS	scaffold_1	1552409	1552970	-		hypothetical protein		PF07249	IPR010829;IPR036908	ENOG410PQ64	S:(S) Function unknown								MYLLPLQLGPTIKSYRPTQAFIRLLQIQPSVQLTSPLHPPFHPHPSYTAMKFAALITSLIALPLTLGATVRWDDTYGNPSGSMSSVSCSDGANGLASRFPTFGKVPSFPHVGAVPGASWNSPLCGSCWELKYKGKAVYITAVDQARNADSYVISKKAMNDLTGGQAVPLGTAQVSAKKVNNSKCHL
PC9H_000529	CDS	scaffold_1	1553245	1554306	-		hypothetical protein				ENOG410Q3QG									MDALLRLPAELVSAILEYVLLQHPSVTDILVVNSTFFHITQFILHRNLRFRTIRQLRQFAMGSGPLACQPQTVTIELAGGVANHHLFTYIKDTLCRAFDVNGGGSTDVDKLQFTFNSHYSAASESLEQLYSALSISRPRTFIWTGPDPPHHFSIAIVPRVTLLLFQAMPAWTDLQHLHLTNVAFPSSNTASPLPSDHQYEDIFPTIPSLQTVHLGQATFLSPLGVARLCANNSATLRSVRLVDTYLESIWGRRLRRSDVEQAVAQLTDAEPERSRYLELMRRLIVCEARTERIMGGDRAEGDTPLSPLIPASWTQ
PC9H_000530	CDS	scaffold_1	1554695	1556432	-		hypothetical protein			IPR013211;IPR027589	ENOG410PKW4	S:(S) Function unknown			SignalP(1-20)					MARFLAFSLVFAAVLSSAVAKEIRNPPRLQAYESGAVHQEIMDMKHRLWNAKEAAGVFNSARYSKIEDFTPCVNGTAGEFRCSNIDLYSFYSHADLGSKTGQGSSSWGWVHEGREYIIIAQADGAAIAEVTADGKLDYLGRLPKTPEAATAIWRELRVLDHWLIVGSEAVNHHIQIFDLRKILEITPEQKPKTFDPRTELTGLFKGLPVGRTHNIVINWDRGYIVSVGSAPRTSEFASGLVFIDISDPSKPTLAGYQGEDGYVHDAQCLIYRGPDTKYVGQDICYGYNEDTLTIYNVTDKANATIISRTGYEGASYTHQGWVLDPEWQQYLILDDEYDEVNGAGAAADGNAVTYIWDVSDLEHPKQTGLFKTPGVTIDHNQYISNGKVYQSNYGAGLRI…
PC9H_000531	CDS	scaffold_1	1557604	1558085	-		hypothetical protein		PF03669	IPR005351	ENOG410Q3JN					3 (o26-43i48-64o76-97i)				MASKNDPRDSSLEVKMSFPKTWNRDGSNPLSVSGMFLAGLIMVTRNRYLAWPAILLAFNAYINQHPLRTKEGSGNALMNLMMCIMALIASYFPLFVVSNSFNVAQSP
PC9H_000532	CDS	scaffold_1	1558624	1560721	+		hypothetical protein		PF01544	IPR002523	ENOG410YFJ6	S:(S) Function unknown		GO:0016020;GO:0046873;GO:0055085;GO:0030001		2 (i402-422o434-455i)				MENQVRRAKIADAIRSYDRSKACVLYVVDTDTHGLFHSRDEVTVTEEEKEDFWNVWLRSKREEGVRTRCLFVENMTGPVLQMIGARYNIEPFFFSSSINWIPARYQEEVRPKRGDRRSIDPTFYDSVTATPKTSRTSLDSAPFNGKNPLFCTIYIGDHYLVATEEEQVIDTQAPLAVRTIDGEHRILLLDLLAVHFIRDAESSTIISYHPNLEQTEEGTGARHLSRRIRLAGQSVYWQNLFSKSPDPTFVLVTYLWHALYAWDEALETLYQYVCYLETQVINTSDMGMTRELHIIRAHHLHYSSLLKDFAKTVHFVSTTSNPAMDAESVTDEERENSKQWLKTECDNLMSQIERLQKGRKMQDQRLKNVMNLVFSSVNIADSRRMQSLTQAAVKDSAAM…
PC9H_000533	CDS	scaffold_1	1560992	1562860	+		hypothetical protein			IPR038921	ENOG410PRBP				SignalP(1-16)					MKLCLQALLTTCIAHAIQIPLRPPPDSAESSTFEHKAWDLNKIPDPDSTGHLIFDTVASLLQHWPNTRYRNGHNIVPGLVPPGTLLYHGRRDNVIPSVPEWVATDPEHSLLFCREDCWHLTLVTARPLKVLYFDGSSAAKMEGGPMDSQDIVAWGKIKPDWTFSERRRIEDLCEWGKMFDLDGFVRMEMDFEIMLCDFSAGVEVASFLNLTSKMTGKDRPGLDTLSVEVIVAGSWHNFYPGETRIVLDLSRLVSFYDTTLSPSLVRKRRGQERWQHRLEGMAESDVHSVMQRLKNVLDGSAPYPSANRIDWATLVKVVVTRFSDRLDLVRRVLNTTNSQIEVGLGDSKLSERAKQAQRHFSTILGPYTLASATPSNASDVSWASPVYRECSVAHTSYIA…
PC9H_000534	CDS	scaffold_1	1563073	1565906	+		hypothetical protein	EOG092R03XU	PF04146	IPR007275	ENOG410PN6D	S:(S) Function unknown		GO:0003723						MSSQAQGSGAPPMPPVPSSPPSSGVRRHHTISASSRSARQGAREIISEETDQQHWDEDEVVDQDWVVQGVLGAVGEKTSLHRQSSLPARYPRTYQTRGSRTGTSTPKPMNSLTAIAGHEGDEEDWERDMRGLSVNDEEAPEVLPHQQTMDPSNPSPLSPHFGAIPSPPPAGAAGVRRHVSLTYGAGAGGPRKIASQLKRSGTLQAPHPHGITPTPPGSQLSGHNTPSPPNAEEEEYGFDPYEYVDEYAAPAGYEGDYPQGQYANPASPIGRSSPWNNTNTAQSNDWRGVSTGGSVDDVQRALSTLELSSQGYTNNSNGASYQGGQAAQPPRFNNAQQQASVPRNGTDGNNNNTPRNNGGKLQLVTDFDGRKTPQGQQPGNSGPASASAYVPNFGAGINQ…
PC9H_000535	CDS	scaffold_1	1566301	1568375	-		hypothetical protein		PF00856;PF05033	IPR001214;IPR003616;IPR007728	ENOG410PQ4M	B:(B) Chromatin structure and dynamics;K:(K) Transcription		GO:0005634;GO:0018024;GO:0008270;GO:0005515;GO:0034968						MSGSRKELWRRSESPTEVWDDTDKEWEFEIVGEELDEDGKTSRYEVRWLNWHRSDGTNVTWPGQKDPIPVRATKAWKQEQATRIQKMLVDSPSSLAIKVPTTLDGHLMETDLRSQGYEQKLAIRRMEPSQAPNKLVEHMHELLSKKLHPITQQPRQSRLQASQARTSTSQARSSTVSSKAGSSKQPASQERRLKLEKEWTAIAHTSHAAPIAIVNIIDDEDGPPLPPNFRYVEQGYIYHKDVEEIDLDAVMVGCDCYECNHEEASACDCQAPSRLHNRNEKIFAYTPDGLFNFQVPSGIEVIECNKKCECNPDCVNRVAQRPRKFVIEVFKTSLAGWGVRSQSNLKRGQVVGVYSGTREQAEEMPLKHRGYCFDLDGYEDPDGNASDSDRQFTVDSRQH…
PC9H_000536	CDS	scaffold_1	1568473	1570375	+		hypothetical protein		PF01171	IPR011063;IPR012094;IPR012795;IPR014729	ENOG410PT1Z	D:(D) Cell cycle control, cell division, chromosome partitioning		GO:0005737;GO:0016879;GO:0005524;GO:0000166;GO:0008033						MGFFGRIHGPEFTRLFLACTPPGGWPRTIAVANSGGPDSSCLLFLLHELMQATVGATSLPKKVVSLTVDHGLQAESALMAEQAAGVASKLGVEHHTVKIPWGETPFPPIPAGDNAFESIARLARFRVLFEAMKKTGALVLALGHHADDQVETSLIRIAKGTTEMGAGGMRKCRRWGMGLGKEGDLGWTGYEGMSRWMVRPLLSVRKEKILATCKEAEISYVQDKTNFQPEITIRNAIRHIISNGEAFSQTLPEHIREGIENMQARAESLEGASFDLSAGSEQLRATVLSLGRRVDDIDEEVNAHLKAIRVSGPPGTFVMSHPTAAKIQNETTRARIIQRILRYVSFHPWGSLRADGNRRGSSLSRIVANVWDPQPQRQANFIAGGGVMWIPAVFKHNKL…
PC9H_000537	CDS	scaffold_1	1570426	1571665	-		hypothetical protein		PF12146;PF12697	IPR000073;IPR029058	ENOG410PQRZ	S:(S) Function unknown								MSGHSFVLLEDGAKLAYQILGAQHLGSSSRQPIVLVGGISSTRGDFERLSDELAKSRPVLVFDHRGIGDSTYSTEAKDDNITIESMARDLCFLVESLQWDSISICGYSMGGVITLQLLFLPHIVNNPKPLPFKITHVFLTATLTSVLKDKNYGVRLNPLPTDRELTPEVLREFIKPQMELMFDPKWLADASTQARQEWWLSRMLIKRPYKTIVKQARATNRFDFSGLHSKLRNTRILIIHGTADRVVPYYCGEEIHRLMPWAQTVQVGSEPGQLPSLEFGHNWYEYFDIKVWRDVFETFLRSSGDQKARL
PC9H_000538	CDS	scaffold_1	1572042	1572478	-		hypothetical protein													MDELSDEENELEDMNSLVRNRGFGFLIPIGRTVTQQEERNDADDESDESSSEEGGGAASVGEDDGDNDSGQDLDASMEDMDGDEEEDTDEDEMADDEDEYEEEPSDV
PC9H_000539	CDS	scaffold_1	1573248	1574189	+		hypothetical protein			IPR008972	ENOG410PRKJ				SignalP(1-18)					MRFASAAIAFSATALVAAQNVVVQVGSVATADGGVFQFIPNDITAANGTTVTFRFTGAPGNHTVTQSSFADPCNPLAGGFDSGFVFIPPTNTTETPEWTLTVTDDSRPIWFYCKQLIPSPHCSAGMVGAINAPSTGNTLANFVSAARAFSGASGQGQGGLSGVGATASAAPSPIVGGASLVGAPTSGAPAPTASGSPTGSSTNTSPSPTGTGNSASALGASSWLLGLGAVMGVIVA
PC9H_000540	CDS	scaffold_1	1574628	1576873	-		hypothetical protein		PF00400	IPR001680;IPR017986;IPR036322	ENOG410PIS0	K:(K) Transcription		GO:0005515						MENDSTFVAPEGVYSVTEEHKISIVHSNSNPPSYPTRLSTIVVRFPAAKQGGGPPGLAQLLGGNRDAKKDSNNLKVVKEKDDGLSLSSSETPEDDLPNGSAQEHIPASPTTPVEPPAATLFSPQVAGRRGRITRPKHNIRTTSSTFITRIQSVEGLSRTLQAKQGDCTFIFYNIVKGFVWIEAGSKAKDPLARITFSAYPTCHDVNNSTASSERLDVIIGFNTGDLVWFDPISSRYCRLNKQGCITSSPCTAVRWVPNSPTLFLVAHADGTIIIYDKERDDGSITPRNHVHPSTDGDAPKPWNPLNEIFVTMPPWHPTAGIGSGKNDKDRAVKNPVSHWRVSNKSVVDFVFASDNKYVAAISDDGCLRVIDALGEQLLDCYASYFGALTCVAWSPDNRF…
PC9H_000541	CDS	scaffold_1	1577028	1578742	+		hypothetical protein		PF02779;PF02780	IPR005475;IPR009014;IPR029061;IPR033248	ENOG410PJGZ	C:(C) Energy production and conversion		GO:0003824						MLTANIKRSARTARKAISHIVRCNSSAVEPPPAGGHLPSVSNSQLLRSTRDAALRSPGIRWADEDDSGPANIVGGRETRKMNTYQAVRDAMSIALMKDDTAVVFGEDVAFGGVFRCTMGLAEEFGRERVFNTPLTEQGIAGFGIGMALMGHTAIAEIQFSDYIFPAFDQIVNEAAKVRYRSGGSYNVGGLTIRTPTMSVGHGGLYHSQSPEAFFMGAAGLKVVIPRSPIQAKGLLLGAIRDPNPVIFLEPKILYRSAVEQVPIDDFSLPLGSAETLAPGNDCTLLTWGTPVYHCETALHLLASPPPSLEKHIPTSLRSASIELIDLRSILPWDVQTVEESVKRTGRLVIVHEAGMTAGAGAEISAEIQKRCFLKLNAPVSRVTGWDLPVGLQFEKFIIP…
PC9H_000542	CDS	scaffold_1	1578855	1588378	-	STT4	phosphatidylinositol-4- kinase	EOG092R011Y	PF00613	IPR000403;IPR001263;IPR011009;IPR015433;IPR016024;IPR018936;IPR036940;IPR042236	ENOG410PHQ4	T:(T) Signal transduction mechanisms		GO:0016301;GO:0048015;GO:0046854		2 (o1972-1993i1998-2016o)				MDFLELKIHQRILSDIASIDQKSDEDINHAQHLIASKVRTRATRQDIEAGAEDGPKLQQESTRVYMPASRVHCNIAFGELVANFPDDYIRENIGTLIPALVEILGDVPFIDFDKCLSWDDWALPDQLVYAIVSALLTLSNSYPDYRGEVTIAICNFLAGIARGIESSSPVDILTHLAPALHGLYRAISSTPFPWSLSQWQQTTKCLNELRGPSIVDKLNHIPTGILRDEDAHSDELQFIQTFISRYISNGRPLSGFFVVCCVIEMQWTILAQALAPPRTTDLKKVSEAAAANRAWSTLMHDAALQIDVTQEDATETLRATIAYAMQCFADLLVQIEEMEAEPSMDTYAWETMSESIKLATICSVALQEFDDKLLSRLLLLLSAESPISDNLVQEAALKA…
PC9H_000543	CDS	scaffold_1	1588635	1589529	+		hypothetical protein													MLQQREKMQPKRANEGGRKLLMGMTSRTIYANSSLDGLLDALSKSQFRCLFEPVISILHIESNAKKNNGKSSGFTTEKQEIFTQCRANATEVSRKGIKHLDAAKQHLEELRNQEIGLDKKIEDMKLMWEANGSNLKAVLQVHPALVEDLFPRRKAETSAAADRLDEHKVEREGSLKTFLKHANTHLSRGREHEKIATDARALIKNYKALLTG
PC9H_000544	CDS	scaffold_1	1589678	1591103	-		hypothetical protein		PF04389	IPR007484;IPR037457	ENOG410PJ5M	O:(O) Posttranslational modification, protein turnover, chaperones		GO:0016603	SignalP(1-35)		M28X			MRGTRTRGRWSPPFTTLTLTLWLFCLLLAPQPTLQARLERRSLKQLTPAEIQALVSSPDPLKQLNPNDPNSHLSKILIPRVADTANNTLVREYIVSKMKALDWHIEEDSFTDTTPLGKKKFTNIIATKDPTAPRRVVLSAHFDSKYFASHDFLGATDSAAPCAMILDLAETLNPLLNKRKERLDAGLEDDDDISDTTLQLIFFDGEEAFKEWTNTDSIYGARHLAAKWENTYIAPGQKRRLYGPSVTELSTIEHLILLDLLGAPSPRIRSYFIDTAWLFDAMAGAERRLGESGAFAYGNEQGMAPGKWRSYFRARTGHESNFGYMGDDHVPFLHRGVSVLHIISEPFPSVWHTLADDASALDLPTMRRWNLVLRVFMSEYLNLHPEPSARSSRSQSELV…
PC9H_000545	CDS	scaffold_1	1591193	1591751	+		hypothetical protein	EOG092R0QEP	PF04099;PF04628	IPR007233;IPR011012	ENOG410PRFI	U:(U) Intracellular trafficking, secretion, and vesicular transport		GO:0030008;GO:0016192						MAIFGLWVINKAGGLVYQRNFSDGLAQLTSNENLVLAGTLHGIHAITRNLSPTGTSSGAHVIEGESFKMTILLTPTATKFVLLTSLTETTADSMLQKVYEAYSDAVMKNPFHTPEMPIRSEGFDRRITSLIGS
PC9H_000546	CDS	scaffold_1	1591987	1595393	+	HOP1	DNA binding protein		PF02301	IPR003511;IPR036570	ENOG410PM3T	B:(B) Chromatin structure and dynamics								MQAQCTNTTTQAITSVQSLAAVQTLLRAGLGCIAYVRNLLPADNFSPSHFTSEDDSVSTELSECSTPGSGRSSSIRQNINGFKIMTMSRGYTDEADKILNYLEYGIFDAVEKQYLRSFIFGIYLDSNDPNNIVEAYTFNFQYHKIPGTNIAIPVMTLDEGVKNMSLNGRDPVVDAVKGGKPPTLRDVKRSVKRLLKALIHSTNNMEALPKRRFATFKVFYTESTPPEYEPPNFRPGDQKKDKWYFMTHDMDEMPEKWSLGSVETGHHSVDVNVRSVVGYLPSSTENDDSTFTGTISVDKNAHKLTPVQEANVRVVEAENQLKDAEQRNIAWAVDGVVVGDEDAEGDEDPEYELGPEGQYVRTVPKGPLVPNENVPVGMRSIDGEIIPLARPHHADEGSM…
PC9H_000547	CDS	scaffold_1	1596068	1599494	+		hypothetical protein		PF00400;PF08324;PF09070	IPR001680;IPR011989;IPR013535;IPR015155;IPR015943;IPR017986;IPR020472;IPR033510;IPR036322;IPR038122	ENOG410PHA6	I:(I) Lipid transport and metabolism		GO:0005515;GO:0043130;GO:0043161						MPYKLSATLAAHSADVRAVASPSNDLVLSASRDSTAISWQRSTDEPIFVPANILRAGSRYVNSIAYIPPTPDVPKGYVVTGGQDTVVNVFRLDNPGDDPDFSLLGHTENVCALDTTASGVIISGSWDRTAKVWSNFALTYDLKGHQQSVWAVLAIDEQQFLTGSADKTIKIWKEHKCIQTYQGHRDAVRGLVLIPDIGFASCSNDSEIRVWTLGGDVVYTLSGHTSFVYSLSVLPNGDIVSGGEDRSVRVWRDGECSQTIVHPAISVWAVSSMPNGDIVSGCSDGVVRIFSASEERWASAEDLSEYEQRVASTALPVQQVGDVKKSDLPGLEALDVPGKKSGEVKMVKNGALVEAHQWDSASNAWQKIGDVVDAVGQGRKQLYQGKEYDYVFDVDIQDG…
PC9H_000548	CDS	scaffold_1	1600437	1601582	-		hypothetical protein		PF01738	IPR002925;IPR029058	ENOG410Q38A	Q:(Q) Secondary metabolites biosynthesis, transport and catabolism		GO:0016787						MSCPDCKNGDVLPGEPTGTISTSGAYYAPGPSPHAKRAVLLLTDVFGLPLKNSKLIADALAKRLECDVWVPDLFAGKPILGVNQLDMPNRPGVKIGFFRWVRFFFSMLPSIPAFIQSRASVVDQRVKSFIQAVQADKKYEKLGAVGYCFGGIVAVRFGATDLLDSIVVVHPGPVSLEQIRAIKIPAAWVCAEEDFSFSDKLREEAEAVFAGREGENNWLLMLAGTVHGFGARPNLDVPEIKEAFEKSQDQIVNWFNKTIPAS
PC9H_000549	CDS	scaffold_1	1602165	1604291	-		hypothetical protein		PF01699	IPR004713;IPR004798;IPR004837	ENOG410PFNX	P:(P) Inorganic ion transport and metabolism		GO:0016021;GO:0008324;GO:0015369;GO:0055085;GO:0006812;GO:0006816		10 (o48-69i81-98o110-132i144-166o178-199i211-232o266-287i334- 359o365-386i393-412o)				MSPSDRTPLLPNGGGENGHNGDASARSVSQRLSTLIKAEGEPSWTHSFIWFLFGSWFNVLLVFVPLSIISHHLGWDAGLRFLFSFIAIIPLAKLLGDATEQVSAKLGQTLAGLLNASFGNAVEIIVGVAALLQNELRIVQTSMLGSILSNILLVLGCSFLAAGLNFSESSFQATAAQTSASLMTLACITLVIPAAFHSTRENGADNDMHELLVISRGTSIILLGIYIAYLYFQLKSHSDLFTAVPQCDSNGDVIEEEVEEPHMSTIAAGIALLGVTVVTAFCADYLVASIEETAERYHIPKIFIGVILLPLVGNAAEHVTAVWMANKGKMEITITIAVGSSIQIAVFVVPLLVIVGWITGHDLSLFFANFETITLFASVLLVNLLLQDGKSNYMEGLML…
PC9H_000550	CDS	scaffold_1	1604461	1605257	-		hypothetical protein		PF00300	IPR001345;IPR013078;IPR029033	ENOG410QED9	G:(G) Carbohydrate transport and metabolism		GO:0003824						MVTARIYIVRHGETQENHSGIIQGQLDTELNDSGRRQADLVARALQQIPFDFAHTSDLKRAVDTAECILRHHPNVVLNKAVELREKYMGLAQGLSIAERAQLPSAEYNHSIEPSQEFVGRMMAWWKREIVGGIGALPPRSAPYNILVVSHGGLIGTLVQNLLRSGEVQRGGGVGVWRLLNTAVTTIDFPDACEPILVKYGDISHLLAQSVEVVQDNADVNET
PC9H_000551	CDS	scaffold_1	1606211	1607366	-	GTR1	GTP-binding protein gtr1		PF00025;PF00071;PF01926;PF04670;PF08477	IPR006762;IPR027417;IPR039397	ENOG410PIE6	T:(T) Signal transduction mechanisms		GO:0005525						MKKKVLLMGASGSGKTSMRSLIFSNNPASLTARLGATIDVEQNHVRFLGDLILNLWDCGGQDAFMDSYLTTQRSTIFKHVGVMIYVFDAETREMNKDLEYYRDCLDGLRTYSPEASVFLLVHKMDLVRDRNAVLTKKQKELTAASAEATAWSSIVHTLIPNAALLSKHLNIFSRACGATEVILFERTTFLVIATSTGPSASTDSDPHELNATRYERTSELVKAFKHSCSRVREEFHSLEMELPDFTAVLDEMTKNAYVLVIVHNPTIETAALKLNIRMARRKFEELQGDSLVS
PC9H_000552	CDS	scaffold_1	1607579	1608264	-		hypothetical protein		PF00885	IPR002180;IPR034964;IPR036467	ENOG410PPKX	H:(H) Coenzyme transport and metabolism		GO:0009349;GO:0000906;GO:0009231						MSTIKGLGAPETLYDGSNLRVAIVHARWNRTVIDALIAGAIAKLKERGVKESNIVVQSVPGSYELPLACSKVISGSHFQAGSTAADLLGGLSFGTDSPKVASRSGTPAPTKTVSMPNGPFDAVIAIGVLIKGATMHFEYICETVSHALMKVQLDTGVPVIFGVLTALTDDQALERAGLGRGEDKGHNHGEDWGLAAVEMASQIRRWNEGKF
PC9H_000553	CDS	scaffold_1	1608561	1610374	+		hypothetical protein	EOG092R0RF0	PF05022	IPR007718;IPR039191	ENOG410PTY3	Y:(Y) Nuclear structure		GO:0005730						MGDTNLVATYTLIHSFLTKQSHVKAAAALKKAVKDVVILKDEIEIEGPQLDEIINEWKKAQAENKQDSSSDSDSDSDTSSDSTSSESSAPKSPKSTAQKTRKASVTRSPPSSSSSSDSSDSDAEQKPKPSKSKPKAVAAKSKSKESSDSSSSSDSDSDASAATVQQKVQKATALKTVKSTKSSNSRSSDSSSSSESGSESDDESSDAETINKKPISKAAKKTKSPDRDSSQTLTSDSKAGKGGSSSPSSDESSSSDESSDEDMAPPAAKTALTSKSGEAAAKADSSSESSSSSSSESSDSDDEVSPVKTSKSKAAAPPEPQPAADPEYTQVTKKRRTSESGAAVTTATTVSLPEESSTNYQQEQKSKRNQGGKQPRKPNTPFRKIDPAKYENTELIDNR…
PC9H_000554	CDS	scaffold_1	1611506	1612412	+		hypothetical protein		PF10342	IPR018466	ENOG410PTY1	S:(S) Function unknown			SignalP(1-19)	1 (n6-14c19/20o167-189i)				MFFAKSLVALLAAGSSALAITITSPSQSAYWVQNTSNVIAWTFNSGDTNPIDITVTNSNNSFLNGIFSIARGVDLTNGSFTVTNVTLVAASGYVVNFVNGTNQSQIFASSGEFDVRTSGTTPASVSIPAPSPTATTPTSGSASGTAASASATGPPAPSPEANAAAPLIANGIVPIALSAAMALFGGIVAM
PC9H_000555	CDS	scaffold_1	1624538	1624889	-		hypothetical protein													MSKAKRRRITSVFSLFVEDAPPADIAYRHVSYQSHGSSLRRSTGSVLLPPLLDSQSPAWEPAWNDEYTTSEQNSLFPPDSSSTLPDPGNFGDLDIAYINELSELDIELVKKRNRTAA
PC9H_000556	CDS	scaffold_1	1625062	1625755	-		hypothetical protein									1 (o50-70i)				MPAGYPSQVIDALRCTVDCQQADWKMHKQVCQLVSAEPHARAMVRFNYRYGHYIHALALFMFGYCDLVAGPRHDEIWKKRVNTHAVVLHVRQHGYTDSHHPYHDYHYSSCYLFPIKLLNIIEEGCRARAEALLQIRQEEKTCIVVIMFEDKVGFSLGARAFLHKVDEFEINQYARASTYNAPHSFRRILLHKARKATPVSVVESHI
PC9H_000557	CDS	scaffold_1	1626447	1629317	-		hypothetical protein				ENOG410Q3JW									MARLASGQAKAARGGRPWTSDAQRVWLMDRMESYMEARQSKQRGSIAGFRRKVLDDFIQEFWKNKKMSVEERGEALGMLDRRIREWFVNHSRKAGPIRGSKVLDLRGTKKKRLAAWQAYSRLYYDTVLKPLVEEQWREDPAYDPTIREVPFEFCNRAVCNLWRIEQDERVKEEVAAYIKEEYQRGGDMEEEDDLDGDDDGDVDPAELSRRQANRKLQTQIEALPLTLQKMCEQIYRELGFVGVVCFAGPEPKSGGSIVATFGTDGRTEAGRALTDVYPELKAQLEGLVYDFASQVTPVERRVACSLPGTESKRDYSPPATSSASASTTTATTSKPAPSRLQSPDLAKHQAALRRLLEKSKYRFDSKANDAMYLDDDDSGTVGQDTDMENGEGGGSDGGA…
PC9H_000558	CDS	scaffold_1	1629627	1630693	+		hypothetical protein													MASANVYHFSIGSEKHTFEIDIPPNAHGHSLRVTIDGTKNKGSVMIIRNTNTSVDDNNDPDCDYNCDTYPIEHSRCHNEEALDESMRNLRPFSPQPASPSRAAAYYTSHSVRLDPGKPVKTAERRKENSGQHPVTHEQHATRQDAVSSPRNPSRAPQFGRKVYVPDFREEDELPTWAELAARARLDSKGCMDRSVRSTGREHHDCQTMGREVPDQEHDTTPTHNPSHPSNLHVPFHRLPALDGVDGDRFPQLFAVPMEFRLKYPLSTNSSRGIHGKEWWAVCKGYEIGVFCDSWPYIQALTGPVNGFQKKAVTWRQALAYYNDYERKSNTYRYIL
PC9H_000559	CDS	scaffold_1	1631135	1634880	+		hypothetical protein			IPR040521;IPR041457	ENOG410Q3XE									MSSSHGTRKRKRHMTTFSLSRGSQIQPVTSGTINITQDVLIAAPQEHQVAARISRSVQRSANGRLMASTTTTYGERALPNKEVSLASRPDTQMNLSAGAESASANAEADVGINLHHPNSNSHHTNDGSHRADDNDLDTQINTVDEELPALHRQQSWAAQQRQTYLEEFYRLEGRGSANGDSNLSHVCHNDENEGKYRCIDCLDTNLYCLTCILHQHCRSPLHRIEVWENKHFVRTSLRALGLVIQLGHSHEETCALPGILRKSLYIIDTSGIHIVSVRFCRCRFLGEDIQLLRYRWYPASPTAPRTAFTLNLLNTFQLLTLQGKVSAYDFYLSIERKTDNAGIKGLQLRYDQFLICVRQFRHLRMLKRAGLGMDPEPVSSTKDGGYAVDCPACPHPGIN…
PC9H_000560	CDS	scaffold_1	1636578	1637796	-		hypothetical protein													MTNVQQSKHRKAAASYYEKNKDALREKARLRMRRLRASDTSKDETVAANAAASKRASQAKYHESRREILCAKEARRRVSKKVLAGIMALFPPADHVDAEEDNECSEVSDIGYLGNGNPSDTDNESEAKIKAEAKTPPIVPKILCVDGREHGQQTSFKQASLPSPAPLTPVGHADPFPKLNLRVPHRLPPMPPPDPHSSAYTRLRKRKRHTSPTAHDVLPPAIRPRTVVEIEGPDVQDELDVENDSDVPSEPDVENDPDTEDPDTEDNTTELDSRSAESETDTEEEDSHFAPDHYV
PC9H_000561	CDS	scaffold_1	1638603	1639249	-		hypothetical protein		PF01693	IPR009027;IPR011320										MAITTDSEISRLAEMVASLAVQVAALTPPANNAGAGANPSPPAPAPTPAPVAVAANSAPPIVPGDGPTMGLPGSSEDQEAEASTCSHRRWYVVIVGLQVGVFRGWTNAAPLVLGVAGSIYNKEPTRGAAIVAFNAAAATGQVCLID
PC9H_000562	CDS	scaffold_1	1639422	1640122	+		hypothetical protein													MGRKWTTKDQEEFLTGWGPRYKQASEKKNYMFFWDDLFSAWFIAFPEAVAADVVNIAPELWSPEQQETAQKGILQRKAQLQDWFRNHMCPDCRVDSPGYIRKLVKLHEQKNTGKHSRKATEMYSARFYQGSDTQKTVQKRLRDEAPRDPAGELIQETKAEKSSRRMKIYGAEIMAAWKGATEEQTSEVLVALDESRMRRMSEEDNDPMPDDQQE
PC9H_000563	CDS	scaffold_1	1640497	1641869	+		hypothetical protein				ENOG410Q45V									MPKGESGAQVPASEGSTLEHMPNQGSVGPPSPSSRSPIPRPPIPQEGLVGNGHRTPQMAQPEGGTDGTARTPTPTPPSGDGSENVSPRHSEGEAAQAEPQASNSPPPENAPSSTSGGREDGPVRAEPQLPHSSSPPPAGSPPPAGSPPPARSPPPENTNDGRRSPSHDATVEHNTTLRASQGLRPDSWLQQALKRLRATEGPDWREAVDLWEGIERNQLEKAQPEGTKVRDCILNLHEPGSQTRQQHFSTVNRPPQIARWFAYGQNFTTDPDISDIAQYEQELLTWWAYLQPEWRTSTDPLPLPLYHTPEGQNWSVLKVTGSNGLLIVMMAFAWWGKAVGLSPLWLTATADLKHTLKALANLCEETGSVPQRSTIKERRGAGTNIGKENSTLAGRRRKQ…
PC9H_000564	CDS	scaffold_1	1649651	1652864	-		hypothetical protein				ENOG410PWNA									MWADWKNTPYRHYYIKELAQLDDARFIIPMKWITVKGIVHAEAYMVEKCSTQIADPEPIRVCADHLKLNVLDLQAVVGACIVFFPGQVVSFPWLASPKNPLRAIANGRPMFRLRVMGWSDDVSGNVSKQYNAHTNVYIQNLGIPHQKLSQEYNVRFVSTSPHASSSEQFAGTPSDFAENAWHDVYDSELEQDILFQLIDHILPADNPQQSEDCSHIGVKGNLLCRRDTVGGSSAVKESDEGYEALFQPGHPRTPDETSQGIREQLRAACLGNKDTVQNLQTQTGVKDKLAQCWIDILLGNAREQQEIQLNNPETRDSRLNDRRLKGDARKAVKLEITTAIQDSLWNWLIGLSPPLKDQSYPRDLVPGFHYNALLARRGTDSVVNLVPAGNLNRHFKGLD…
PC9H_000565	CDS	scaffold_1	1660536	1661802	-		hypothetical protein				ENOG410PWNA									MPAERQKLPEGFVEVTGSPSHILCQICTKSATRNATAKAAAMATKSAIDNPGRGSSSNTAPITLPAISRYTGSVDDTHRPGNQSLSLMENTFEDVQMHGTEYLDHDGNEMQFSAGNVLDRIADARHDLHEQIESIGLLEDHTIFGQMSTSITDMDVLDEDDTNVTALETAFQLLGIDDLEEGEEDPFVPEEDMEASSNDEWKPHGSKTMFMVDLLDNLPRLRLSDDQLKAILWVMRECGAPDVPSFSCLRRKQEKMFRDMCLAPEHHTSSLGNHFFVNHPAKLLALRKSQENELAFSGMLLVLKY
PC9H_000566	CDS	scaffold_1	1661992	1663280	+		hypothetical protein				ENOG410Q3PH									MAPPALSDILNSSSPSPPSSPGLSLTHRRRSSSVMTTAPESDELTHSDSGHDQTQSLKRPAEDLDQFADALSRNVRLKTSQKDELKQFVLLSEAQQQVWLAAQLIKVVDVLNTLEAPDTIYQIPTTMERRIELYTYLVLVSPTTSVYVMNAGGPLSLILDHMETVPSWGLTPEVKADKAKFDVVCSRIRNRLTHRRNEMKTMIRDSLDTPWTDIVALCHQILAMGDRVVVTLKVSLQMVAWVAFLRAVYRDHMGPDKKVDKYWRLVDTQLKEVRDTTNGDTKKLSRFFAKVLTHDREAYGNPSIDDLELTSPGAFDDPPQRR
PC9H_000567	CDS	scaffold_1	1668654	1672427	-		hypothetical protein	EOG092R01E2	PF08774	IPR011856;IPR014883;IPR033315	ENOG410PJWP	S:(S) Function unknown		GO:0016788;GO:0004518;GO:0003676;GO:0036297						MLLVTNRAATRLNLKPSPTNPEPTNTRQFAKGSLNMDVDEDIQENDPLDEVNLERIEAVLDEIDDKCRSENQEERRPSVYLRIFEEMINIVNEYEYCLLSEEEWDVIGKFSHISYNSRFLLARLALRKPGQWYSVPKLQNLKKEVGEGLVEAIDELTYTKPSFDTSSPEVEMDIEPDIKQEPEPDCIDLTLDSDEDFAPVSSSETRTTTTTPSSSLPNAPGHDYSYFCQNEKVMTLLEMLNCLKVEQLKAVAKEMKVKVGKLTKAEIIALLINRSSKQSTIPFESSPVKKPNNSSHLRQSTLGFIITSKHPKPPPLRQNKLPFKPIKPPSQELVLRGLALKQLTKCVRLNPDIFDLLMRINIIAFRSTELPKSIALPALLTAFKKRTYTRYAFKRTTGV…
PC9H_000568	CDS	scaffold_1	1672535	1673777	+		hypothetical protein	EOG092R0HHR	PF04000	IPR007146	ENOG410Q0YF	A:(A) RNA processing and modification								MDSTAVCGVINEVSRSIASVRECIKDLHEKQNGTDLDTKDGISLLTLKNHVMVSYLQSLLLVSSRRALGHSLVDRQPSSQPFSDPVRSARGSNAGDLVDSMIENRVVLEKIKVLETRMRYQIDKLVKLAEQSPDTAESAADDPLAFRPNPQNLVQVDGDGAGNDRNKDRDHSEDEDIYRPPRLAPTPYIETAKDKRAKRLPAPSALTSLLDIDPSRPHMETTSGLGTTPSLTSARARELNRITEYEEENFTRLMMKKKDHIRRLRDEEDIALGGSASVGGSSGKTRRRGGGFEDEFNDVLKNVGKSRGAFDRDGYEQLRERGKKGDILERSRSKPKSRNSGTDEVGEETGDSGRKRKRSRFEADMKSTKKKLARSRK
PC9H_000569	CDS	scaffold_1	1674087	1676425	+		hypothetical protein			IPR001680;IPR015943;IPR036322	ENOG410Q34R	S:(S) Function unknown		GO:0005515						MLAVSTAGALLIAEPHSLKRDTVTPLIDLSISPNSCAWANGSTVYLSSDEAIYRYDCVAGSLDPVMSLAEPNSRVLVKDGSSLIVSDGRKVHVVDVKGKTTQTLESHTSVISSISLSNDASLLASATSAVVHVYNLATGSNSVLRGLALAGQSIGACAFHSHSRTRLLLGIGRQFVVYDTTRPSSPVKTIPLDTSSSGDINAISSSPFSKSLVAVSTTGGYLGLIDLEKEKGLFRTLNLGVAVPSMSFSQDGASVYLGTCDGRLLVVDLRALEKPPKEVTVNPDSKPITAIAIQSKSQAQEALKKDKVASTSKVTTSSRGAISHKTTPKSPSKPLSSKKSKTPAMVDAKACSQPEETKGLNDSQISVQLETLSAFKAPSKSKVSTTKADSPKVSKAKTL…
PC9H_000570	CDS	scaffold_1	1677402	1678687	-		hypothetical protein								SignalP(1-21)					MQVTLKFAALAFLAQAAVIAAFPLYGTNGARTRQRPRSLRSHKASYARTTGQHNQRGQWGDLRGDLPQREQLGINVSRSAWPATTPRHRLAHTTDLHNLRGLQSRRGDLRQRARLESGILMNSKPAVLQNAPQPAQPARPAWPKMKAGKRDFDELEARGPIKRPTQQECEVACTLAGHQGAAWNQCVSQCMASNYPTPPPSPHNRPAQPARPAKPAGRPAPKVKAGKREVEGADEE
PC9H_000571	CDS	scaffold_1	1679661	1681687	-	PRP45	mRNA splicing protein		PF02731	IPR004015;IPR017862	ENOG410PGB0	A:(A) RNA processing and modification		GO:0005681;GO:0000398						MATLAALLPNPIHAPTVSDDEEDEIVQQPQAAAPSLSIISRGVVPPYGQRAGWKPASQDDFGDGGSFPECHVAQYPLEMGKKKASSGNTLALQVDSEGNVRYDAIAHQGQRAGKIVQSQFKDLVPLQHRKDLDDEARNMERPSEDEVQATADKTRAALEKLVNGKIKAAQPKNVPDGQGKTSFIRYTPGQQNGSQGLNQRIIKMSEIVEDPLEPPRFKHKKIPRGPPSPPPPVLRSPPRKATAAEQKEWMIPPCISNWKNNKGFTIPLDKRLAADGRGLQDVHINDNFAKFSEALYIADRHAREEVRQRALMQQKVAQKEKEAKEENLRLLAQRAREERGGIAPKPTAASRAAMTSKLADYGSDSGSGSGSEAGSDDDAEDEDARKIRDQMRQEKRRER…
PC9H_000572	CDS	scaffold_1	1681929	1683928	+		hypothetical protein		PF00175	IPR012349;IPR013121;IPR017927;IPR017938;IPR039261	ENOG410PI7F	S:(S) Function unknown		GO:0016491;GO:0048037;GO:0055114		1 (o493-511i)				MPALNGWHRGERAIQEKLGYRAAMAMAFAAIDGDMPEQHREFYVTRLPFVPVTTLDELGRPWGSILAGANGEPGFIQSPSDAKLVLDARVWEGDPLLQNSDLFGKKDKMLVAGIGVEFSTRRRNKFAGWISKLEKKGQQIQLQLDVNEAIGNCPKYINVRDLVPHPQASPKIIHRELSLSPSDRLPDDIIKYILDADTVFIGTSYVAPKEDESSYPSHVGMNQRGGRRGYIRVKPSDGRTIVLPDYSGNRLMTSLGNIEVTPLASLTFVSFTRGDILYLTGEAQTLVGPAAHKVMPFHNALTTVRTTGYIFVADALPVRQRPGTTVVPSPYSPPVRLLAEEASLTSYFQGNGKDVTAILQSIKILSPSLATFTFTTSEDIYFKAGQAAILDFTPFIGEE…
PC9H_000573	CDS	scaffold_1	1684116	1685629	+	TIM54	mitochondrial import inner membrane translocase subunit tim54	EOG092R0DEA	PF11711	IPR021056	ENOG410PGC5	U:(U) Intracellular trafficking, secretion, and vesicular transport				1 (o45-62i)				MSTPDADPKPSLKTGSSSSGIRTVLRYTGIPPSWLDKRPKLPSRNWLIFYTVTSSIAGLYIYDRQQCKRIRKGYVERVQYLAEEPINPMDLARKVTVYGAKWPGDEDYDVGIKYFRRFVKPILVAAAVDYEMITGKRHGEIANRVADGIKAHRRVNAGLDPRPEYNMAIPTLKSPEVQRQLELQGGIVLIGRPTFKEFMAGVSRGWTEGLQKVDQEEELAHLLENDGRFDEPEIDEDNVPMTDSASPTSIVPPKSAIFSPLQLQQRAPVPKPETSSSIPDALNAPPVTIPRLPPLLFVPFIDYIGIAQVPLMIWDFFNQRRYVKSGAEAAYRLVKQVTRPIDVPDTVAQPLFADITKEDEGISHGDLDFDKKVESYYKSSTSSIPSDIEKARKKYYDAL…
PC9H_000574	CDS	scaffold_1	1685794	1692017	-	MER3	Sec63		PF00270;PF00271;PF02889;PF04851	IPR001650;IPR004179;IPR011545;IPR014001;IPR027417	ENOG410PFEF	A:(A) RNA processing and modification		GO:0005524;GO:0003676						MYPTQYDDPESPISNYLPFGGVNSSQLEIGGAEYYDDSEIYTSSPTPQERCRPGNAQRSSQYGYSDPGRQIVPSIYDEESSFDYPEHLPPANYGSAHNSAVQPMQPPASYSSAHGARNVTAEYTQYDEDRYPGSSSSYPRGNFDQEPDYPPPQGNSTRLIPVSTLPDMYRSLFKFGVFNAVQSSCFDHVVNENDNIVLSAPTGSGKTVIFELAIIRMLTKARETNPLAKCVYMSPTKALCSERFRDWSTKFDPLGIKCCELTGDTVQFGKGVWGDAKNAAIMYVLPEKWDSLTRNWKGHGQTLSTIQLFLVDEVHILNEPRGSTLEVVVSRMKRNGTEVRFLLVSATVPNIRDIASWIGNSRRDGPSLCFEFGEEFRPCKLTRHIYGIQRGQSQNEFSF…
PC9H_000575	CDS	scaffold_1	1692202	1692664	+	SUC1	transcription factor		PF01111	IPR000789;IPR036858	ENOG410PNWC	D:(D) Cell cycle control, cell division, chromosome partitioning		GO:0016538						MATAAAQKEAQVKLEEYIEKIHYSDRYSDDMYEYRHVILPKPLLKMIPKQYFSPEDAGTLRLLTEQEWRGIGITQSLGWEHYEVHAPEPHVLLFRRRKDYIPPQHIAGKAVRRK
PC9H_000576	CDS	scaffold_1	1693501	1697770	+	IDE1	Insulinase (Peptidase M16)		PF00675;PF05193;PF16187	IPR001431;IPR007863;IPR011249;IPR011765;IPR032632	ENOG410PIQE	O:(O) Posttranslational modification, protein turnover, chaperones		GO:0004222;GO:0003824;GO:0046872;GO:0006508			M16A			MATSAFQPDWTPSQPSSLTPPYSVFTKPIEKSEQDNREYRLIQLANGLQAMVVRDPNADKAAASLDVAVGHLYDPDDMPGLAHFCEHLLFMGTEQFPRENEYSEFLAKNNGGSNAYTSTSNTNYYFSVATPALAPALARFAAFFHCPLFSPSCTSRELNAVDSEHKKNHQSDMWRIFQLNKHLSRPGHVWNKFGSGNRESLSKAGQELKSKGRLTRRRLIEWWSKEYCASRMRLCVIGSESLDELSEMVSKLFSPIPNRGRDALPMITEHPFGPNEMGTQVSVQTIMSFHAVEISFPLEYQPPLWRHKPANFLSHFVGHEGPGSLYSYLKNKGWVTSLSSGPQNLARGFAMFKVTIHLTDEGFKHNRDVTLATFKYLSLLRSSEFPAWHQREVATISRT…
PC9H_000577	CDS	scaffold_1	1697830	1698385	-		hypothetical protein		PF01910	IPR002767;IPR029756	ENOG410PQQV	S:(S) Function unknown								MCDISLTLRIDFCLIPIGTGEPSVAEYIAECHRVLEKSGLKFQVLQGPWSQVMQAIRDCHAAVHVKGAPRVATDIRIGTRVDKELVPGHGNEDKLKRVQQILAFDNKE
PC9H_000578	CDS	scaffold_1	1698717	1700858	+		hypothetical protein			IPR011992	ENOG410Q3TE									MASTVQSRISEFESMRYTKYSPPSLLETPLSPTASSFKAMAPQESPSASHGSPSGSSSGMDRKPSLIDLRDWVVDDGPSVELDDNSGRKTKGNLYTPTPTQKGFGNELNRSNSAPLINLDSPPKLKATRNNNKQTHESNKPPPPLPPRKPSFVSLKDAASSSSKRSDSLTVEPPHTYPPKLSLTTNTSSLSNGSASSGSLRTGLGHAPASSISSFHSVSLSSDGGTDYDPSTPGSISSAHIANYPVERAEFHSTAHGGDTSSRPVTLINGREADAVSLDESFENVSSSSIGSPATNAIITMDWERALSKNKFPYTPRTPVPPKLPQRPASSTSKSPGSKASSSMPYHSSSAPMSPKMQPMSSASSSHSSDSVSSSFTVIPSAVRRKPPPPPPPSSYPSP…
PC9H_000579	CDS	scaffold_1	1700978	1706203	-		hypothetical protein		PF00145;PF01426;PF12047	IPR001025;IPR001525;IPR017198;IPR018117;IPR022702;IPR029063	ENOG410PK6H	H:(H) Coenzyme transport and metabolism		GO:0005634;GO:0008168;GO:0003682;GO:0003886;GO:0090116						MVLSVSPRRKSYKRVLSSPDESDAGTESKRTRLSSEVTIVAFREKTITNQVPRVSPESFNQPNPFEAFEETIPPTDDDADLPLQDQTSGTLSRVRRRRGLVLPETSNSDVDEDERSTKRARLDLVTDSTPSEKYNALQASPTVSEFEASGSRHTRTSRLTRKDTSKGTVVDEDDALRIEGETPPDEYDSGSDDDIPIRVLTNFCIYEGSHPGELVFPDPLLAEPFPEGIFRASGNVRAYVEPDSDEEEDESCAAAMTTVGPMVRLSSILEFNFHDYKNRAFNRQLYIRTQFAWYILEEPSPAYLPLYTNFFRNHEILHLILKQCLSDWTYTRKDLGVLLRELEPWPYVAAFGGPLQVSDLQSESFLAYCSNVLESVISSLPRKDSRKWKGIPLIRELLE…
PC9H_000580	CDS	scaffold_1	1706376	1709082	+	MCM7	Mcm2-7 hexameric complex component	EOG092R0362	PF00493;PF07728;PF14551;PF17207	IPR001208;IPR003593;IPR008050;IPR012340;IPR018525;IPR027417;IPR027925;IPR031327;IPR033762;IPR041562	ENOG410PGHK	L:(L) Replication, recombination and repair		GO:0042555;GO:0003677;GO:0005524;GO:0003678;GO:0006270;GO:0006260						MSLPTVPINVDYEEERSTIQTFLTKFTIEEDVTRRIATLDIGDVQDGLDSQDKTPKYVHQLQQIANRDLQMLVIDLEDLHKFEGTVARLVSRIRQNTRRYVSLFCEVVDKLLPPPTKDISEQDEVIDVILHQRRERNEQTPEGFPDHLLRRYNLYFKPLDSEIPLAVREIRSAQLGKLITVRGIITRVSEVKPLLLVNAYTCDVCGSETFQDISNKTFNPIVDCQNEAECKKNGIHGSLHMQTRACRFSPFQEVKIQEMADQVPVGHIPRSMTIHVNGNLTRLVNPGDVVHLSGIFLPTPYTGFQAIRAGLLTDTYLETHYIYQLKKQYSDMEMTPEIHQSILELRQDPALYHKLSQSIAPEIYGHEDVKKALLLLLVGGVSKQTGDGMKIRGDINVCL…
PC9H_000581	CDS	scaffold_1	1709475	1712061	-		hypothetical protein				ENOG410Q391									MLLRLPAELVARIALHLLDSQPFYPPRALNSLRLTCQSLRQLLDSKHFKGKAFGVCFDVGSVGRRNFVADTGMRADQFEVWSRTVRSISEKDVNEDEPGDHAPFTLLTTYPWDIGETFLQAYVMLLSNDGKNIAQLEHAGLYLLLRAYLKKYLYKGELLDKGWPVESLENSCALWLLWMMTTEERLSKESLEEKEELVSMILPWVMVPFRYSSAHAPPSHYTLPLDQHGQSRQRYNLPHTVTTAHGHYPIYGPAVLPAPTSQAIVNLPYTRGNYLDVSYFGTRCIFSAPPPSIAAKLLYFSRRRVGFQIPPHLPATRAEAIRRAQEAWEREQRENGRVIGENGVVWDGRMPIGPTKEDMVDLNAHQSTELPMRSSWYAGWNGLDALTAPPSRWWDNDYY…
PC9H_000582	CDS	scaffold_1	1713216	1716108	-	KEX2	pheromone processing endoprotease		PF00082;PF01483	IPR000209;IPR002884;IPR008979;IPR015500;IPR022398;IPR023827;IPR023828;IPR034182;IPR036852	ENOG410PF8E	O:(O) Posttranslational modification, protein turnover, chaperones		GO:0004252;GO:0006508	SignalP(1-22)	1 (n2-13c22/23o737-757i)	S08B			MLLPWTLLLAFFSQQNPSFVFAATPAKRFYDTHKYYVIEHNPRAPSGAPLDVVARSLGVEVVERAGELEDHWLVRAPKSRRELVSRAEVTDHVLGAFEILKARSTSPLSARSDEEAHHARSIVASVKFLARQELRRRVKRAPPPIRPPDNTSASSKAVAERYSIKDPLFTAQWHLVNDEYPVHMMNVTGAWDMGYTGKGVISALVDDGLDYRNKDLTDNFDAAGSYDFNDHTDLPTPKMFDDHHGTRCAGQIAAIKNDVCGIGIAYESKVAGLRILSGPISDVDEAAALNYGFQNTSIYSCSWGPPDNGRSMEGPGYLIQKAVVNGINNGRGGKGSIFVFASGNGAAHGDQCNFDGYTNSIYSVTVSAVDYKGLHPYYSEPCAANMIVAYSSGSGKHIV…
PC9H_000583	CDS	scaffold_1	1717217	1721155	+		hypothetical protein		PF01822;PF03659	IPR002889;IPR005197	ENOG410Q42C	V:(V) Defense mechanisms;W:(W) Extracellular structures		GO:0016787	SignalP(1-29)			GH71		MHSLMFSTCFLLFSTVAARLSITRPPAQANNQQSYVLSNGNSTTFTGDDPAELVKRDGTKYVFMHHIVGTDWADDIRQIQAKGIDAIALNIGSSDWQRGQIASAYAAAVGSPLKLFISFDFTEMPCDVADVVSRTNQWVNHPNQFKVNGKTMISSFSGDCFGNNGWQAIKDQTNGYLMPFIPNLEGKFSSWPSLDSWLCWGCAWPQGDYTKNTDDDNYYISQLGTRYSATISPWFYTHYNYKNIVYNSDNWLLVTRWEQLMSFRNTITFAELVSWNDYGESHHMGPVKGAMPSGTNWVNGLPHTAWFDMSQYYITAFQTGSYPAITKDVIYFWARTHPVAATASSDSLGKPSGWNWVQDTLWAVVFATSPGSVTLTSGTNTQTFSVNAGVNKLKLPLSP…
PC9H_000584	CDS	scaffold_1	1722379	1724556	-		hypothetical protein		PF00191	IPR001464;IPR009117;IPR018502;IPR037104	ENOG410PJTM	U:(U) Intracellular trafficking, secretion, and vesicular transport		GO:0005544;GO:0005509						MSYNYNYNQPPYQQPGQNPAYPGYAQPQYGAPGGFMPGMPPAQQYAPPPGAPPIPGNRPQSGAGPASNGAGYYPPPQGPPPPGPPPGHQASYFPPPPAPGPGPYGYAPPPGPPPGPPPVQQPYGYGYAPPGGYMPMTQYLGTPIPLSAVNKYSTDPPVPGYDARGDVEAIHKATKGFGTDESQLIRTLAPLNALQVATLATQYKAAKGRDLAQLIDKETGSWFGMGLRGIVLGPLGWDVELLHRAIAGVGTHEDLLNEILLSRTNDEMNMLKSAYRDHYGRDAEQDVSNDLSMKTKNLFVMAMNASRVPDNVPVNAQQVTADVNQLFNAGVGRKGTNEMVFCEIMVNRSGPHLAAISAAYHAKHKMTLTRAIKKEFSGHMKDALLYIAEGAKRDGRGVW…
PC9H_000585	CDS	scaffold_1	1725002	1728033	-		hypothetical protein		PF01822	IPR002889	ENOG410Q42C	V:(V) Defense mechanisms;W:(W) Extracellular structures			SignalP(1-16)					MRRITVSLLTLALVAAARLDGMDGGATSAVVVSASTTDCTTSLITPSPQAASVTGASAAITAPPVVTGSPSKVTGTAASTSSALATSTASATIPVSHHKSYVGCIQDVAAPGLHALDGFAKKSAKLTIKKCIASCKAFEYAGIKGGDTCICGNKFVNGATGALLDERKCHIKCSGAKGHGHGKCGGHKTISLYALDLPEDDEPKAPAPAPVLAAVIPAAAPSAAAPSSAAVSSVAPSSAAPSSAAVSSVAPSSAAPSSVAPSSVAPSSVAVSSAAPSSTVVASVAPSSAVPSSAAVSSVTPSSVAVASVAPSVAVSPAPTSVTPKSVVTSLAVPSTSSASKKVKYITVTNVETISAAPVASSAAPTPTPAASSVTSASSDADDVPVLSFSASTTATPTT…
PC9H_000586	CDS	scaffold_1	1728823	1732433	-		hypothetical protein		PF02765;PF16686	IPR011564;IPR012340;IPR028389;IPR032042	ENOG410Q0GG			GO:0000784;GO:0003677;GO:0043047;GO:0000723						MKRAVPYEDTRIAKKARISEDAFDEALECSVQDLYRSDTDGTGFLRAKVFMIWPTVNGQLRIQVRVVVDSKQVGFEVTFSGQCAEYFSREHLHFHSTDEVLLSLRGAEVQKKKPSTSPTTFPISLRYAEGTMIKFIKTVRWGDEERVVDTWKLKAEEPDWFKSPSPVDDVNEVISKPEFKPIVPRKRVDTHISSRTPSNEHSPVGRHSPPSKAVVDRSDDAQDAHKLQKGKRAPSPPAQGSSTRERPPRAVKMSKRQKKVDRLAQKHPNGVSAKEIADGTRAEEPIPNPPTRDDTPATCGSVRHEEPGKVDIQATNGSKHPEEPGLNTSATPTVESASTKPPELRVGFTNDVGDKFSPLADLKQVGVFCNVVGVVVRCTPAEKSRKGDFTCTISIVDPT…
PC9H_000587	CDS	scaffold_1	1732553	1733938	+		hypothetical protein		PF04177	IPR007304;IPR038511	ENOG410PHEG	T:(T) Signal transduction mechanisms		GO:0009966						MSVPLRSLFHKVLHSASKAHDLPTGDDATQDIVQSCLSDLKLLQSRITGLGLFSPNETIEDISTRDLVYLLVPYIYAQVIERIRTTEREDRLASLAQAQRLLRSFLESLDDYHIISEEDRELYKQKASTIRDPATRRELKIKQYKNEKQLKQRIEAIAIRRNQAAPLKSSPSEFDLIMALLPPEVENDDEQDDEDEATSDAARDAILLLLRLGYTHANSQLESMDQESDLLRSAPPEPPTQTSDDPRRDKRKELDDMWRLDAPRVSGGPDGKGLLLDPNGKPLRPFTILPAGTSARARLQAQVFGPDHRLPSMSIDEYLQIEQERGNIITGGGPASEIEPTSSEQLALDAEEDGTLLGEANAEKKRQKDENWAVFTDENPRGAGNTMNRG
PC9H_000588	CDS	scaffold_1	1734273	1735191	-		hypothetical protein	EOG092R0MAA	PF00025;PF00071;PF01926;PF04670;PF08477;PF09439	IPR001806;IPR005225;IPR027417	ENOG410PI1P	U:(U) Intracellular trafficking, secretion, and vesicular transport		GO:0005525;GO:0003924						MDSPATPSADFSSSPPKRTKIVLLGDQSVGKTSLITRFMYDTFDNTYQATIGIDFLSKTMYLDDRTVRLQLWDTAGQERFRSLIPSYIRDSSVAIVVFDITNRQSFLSTSKWIDDVRSERGNDVIIVLVGNKADLSDKRQVTLEEATEKSTQLNIMFMETSAKAGHNVKSLFKKIAMSLPGMEKDTQGDAAQKIDVTTPAQAEVPEASQCNC
PC9H_000589	CDS	scaffold_1	1735440	1737782	+		hypothetical protein		PF02219	IPR003171;IPR004621;IPR029041	ENOG410PH5R	E:(E) Amino acid transport and metabolism		GO:0004489;GO:0055114;GO:0006555						MKLSEKIASYTSSRPFYTFEFFPPRTDQGFENLVPRITRMAGLNPLAVSVTWGAGGSTKDRSLELAGIVQREHCVDTILHLTCTNMEKGLVDEALRAAKDRGIQNILALRGDPPRGEEDWIATDDRFTNGKNLVSYIRSTPEFASDFAIGVAAYPDGHPESSLTEEEEIANLKDKVDSGADFIITQLFYDVDGFLRWLQKVRDAGITVPVIPGIMPIQTYASFQRLIKLCGSRVPPSIMAELEPISNDDQRVKNYGVSLAVSMLRKLSASGIKGFHFCTLNLEKSIQRVLETLKWTGPSTLEQNKLIVDSELTVSPHNATGSAKMHLMNLPEVEGEAGKGELNNAATWDDFPNGRFGDFKSPAYGDQGPWGGLLISRNEALIQWGRPKSVQDLTKLFVD…
PC9H_000590	CDS	scaffold_1	1737916	1738760	-	VPS29	Vacuolar protein sorting-associated protein 29		PF12850	IPR000979;IPR020935;IPR024654;IPR028661;IPR029052	ENOG410PJ94	U:(U) Intracellular trafficking, secretion, and vesicular transport		GO:0030904;GO:0042147						MVLVLVIGDLHIPHRTHDLPVKFRKLLVPGKIQQILCTGNVCDKETFEYLKTVAADVHVVKGDYDETPTFPLSVTVVHPPIKIGVIHGHQCIPTGDLDSLSAIARQMDVDVLISGHTHTFQAIEYDGKFFVNPGSATGAWTGLHTADPIPSFALMDIQGPVVVTYVYQLIEGEVRVEKVEYRKEDDVPKEPPKSAVPPQSIPTSPSISSGGGGW
PC9H_000591	CDS	scaffold_1	1738963	1741131	+		hypothetical protein		PF00646;PF12937	IPR001810;IPR032675;IPR036047				GO:0005515						MSFQDAKERRPVRVMLPFELTHHIIAFLNDRSDRRNYQKVGFPALKACSLVCRAWNDICRHCIFHTVTADICISQERDSPLSFLHFTAPHLYRYVTDLILFWDRDVYGAPEWIPNTLPRFVNLRSLYLESRMTSGAPALPRPFALGVMALLDKAPLKCLSLTYWDFLADASDLLLLLSVCSTTLEELSLETCSVSDRGTMPNMIVSESRVPPIVCLQALRKIKLQGDSRAFQTSRIESPNLRSLVYEQIQNSFCTIPNWISDKLSEVSLKAFEVSDIPDLGQSICPSSMTVDISKSHDDSFFTILSWVKGCLQSLPFPHVLRQLNIKIKSNRLRESEECCYPTRADYELLYSTLEPLRQHGALHTNLSISILSLNHRAAIPADNTMNEEVAKLKEVFTP…
PC9H_000592	CDS	scaffold_1	1741991	1743229	-		hypothetical protein		PF11911	IPR021836	ENOG410PQ8C	S:(S) Function unknown				3 (o157-174i195-222o242-263i)				MIISRIPSIARSVALRNGPLSIARPVVRPTMLASRNVASSVSGRPASQTMGQAALNIKEEVGNSAADLAKVIASANMTSDAVAPQKDTFLGITNSVASSVPKPYLVFGLAGALPYVGTAAATVWTAKQAGLAATGVVTNIDPGVAITILDQALNLQVTYGAVMLSFLGALHWGMEFAGYGGHKGYSRLALGAAPILFAWPTLALQPVTALIVQWVGFTSLWWADSKATQLGWAPKWYSQYRFYLSILVGTCIIGSLAGTSFYGPVGGHGLVSHDLDLLREQRKQARPEGAGVIHGDIEALPAGENDDHYVNIRKKAKDSEKKNN
PC9H_000593	CDS	scaffold_1	1744407	1745705	-	COP3_1	Alpha-muurolene synthase			IPR005630;IPR008949;IPR034686	ENOG410PNTN	S:(S) Function unknown		GO:0016829;GO:0010333;GO:0000287						MAPVASFIQEPSRGPSSFILPDLVSHCKFPLTYHPQGDAIALESVTWLDRLCPDLSPKARKALWGLQAGELTAYCYPSCSPDRLRVVSDFMNYLFHLDNISDGMMTRETDVLADSVMNALWHPEEYRPTRSPGKEQPAEELDAGKIARDYWSRCIPGAGLGVQARFKESLQLFFEAVNVQARARDAGEVPDLESYIDVRRDTSGCKPVFDLIEYAMDFELPEEVVNHPVIKALNQGTNDLVTWSNDIFSYNVEQARGDTHNMIVILMKYHGHTLQSAVDYVGELCCQTINNFCANRQVIPSWGPETDRMVQEYVQGLQDWITGSLHWSFKTHRYFGTNGAEVKKTRLVELLPLKNGAKPCAGEATK
PC9H_000594	CDS	scaffold_1	1747813	1749219	+		hypothetical protein		PF08327;PF09229	IPR013538;IPR015310;IPR023393;IPR036338;IPR039981	ENOG410PHXM	O:(O) Posttranslational modification, protein turnover, chaperones		GO:0001671;GO:0051087;GO:0051879		1 (o351-371i)				MALPPSTANWHWKNKNVTRWAREWFEQELVTISVKGDSDGEVARVSRVTEVDGDVELGQRKSKLITIYDCKITLDWSGQASDGTDVEGKLTIPEVSHENTLDRSTDYVYDWSLVTSASPAVLALYEVIKKRLPAALEAKFAEFPEVLINTHGKDLTVSADPSRTGTPAPSGSATPAATSANAPPAPTPKPAKKENVNTATVSVNANLVASADDLYSLLTEPGRLPAWTHAAAQSSPTVGGEYSLFGGGVSGKYISLAPGKEIVQSWSLKSPTWPSGHSATLTTTLEQGSDSTKITLSLAGVPTGSEEEITRNLEGYYIHGFKSIGYVQIFPYTLSSQPKKSALASKPRPSYVPAAIIATLVLVAAFSIPFFSTPPSK
PC9H_000595	CDS	scaffold_1	1751608	1752930	+	CDC10	cell division control protein		PF00735;PF01926	IPR016491;IPR027417;IPR030379	ENOG410PJQ5	D:(D) Cell cycle control, cell division, chromosome partitioning;T:(T) Signal transduction mechanisms;Z:(Z) Cytoskeleton		GO:0005525						MAAAAVALPPVEEIRADSYVGFDTITQQIEHKLLKRGFQFNIIVVGQTGLGKSTLINTIFASHLMDSKGRFAADEPVRQTTEIQAVSHVIAENGVKLRLNIVDTPGYGDQINNEGCWDPIIKYIKDQHSAYLRKELTAMRDRYIQDTRIHCCLYFINPTGHSLRPIDVIVMKKLSEVVNVVPVIAKADSLTIEERDRFKAMIREEMVHHSIRLYPFDTEDTDEEEVQLNESIREIIPFAVVGSESNVIIDGKAVRGRKNRWGVVNVEDATHCEFVHLRNFLTRSHLQDLIETTAQIHYEAFRSKQLLALKEGVNQRPAGDR
PC9H_000596	CDS	scaffold_1	1753353	1758323	+		hypothetical protein		PF00702;PF13246;PF16209;PF16212	IPR001757;IPR006539;IPR008250;IPR018303;IPR023298;IPR023299;IPR032630;IPR032631;IPR036412	ENOG410PFR5	P:(P) Inorganic ion transport and metabolism		GO:0016021;GO:0005524;GO:0000287;GO:0004012;GO:0000166;GO:0015914		10 (i83-100o106-124i395-420o440-463i1066-1085o1097-1118i1148- 1171o1183-1202i1214-1235o1255-1275i)				MAAGKSRLGAWYARLAAFNVETLFVRKRPPGPPRIVFVNEHLPSDYYDHKGRVKPEHIYVTNQVITSKYTIITFLPRNLLEQFRRVANVFFLAIAILQFFNKFSTISPGLVILPLLIVIAITALKDGYEDVKRHQSDKRVNQSKVRALRGGEWVNQNTMSAKSKTFVRGMVPNGGFRIPRSVTLLGGKNKVLLDPPAPAQPEPLHDVEFDEPHHPSNGDHHHHLHLGILGEEEPKQPHWKKTMWEDVRVGDYVKIMNNEPIPADVLICSTSEDENVAFVETKNLDGETNLKSRNAISALTHLRTAAECANKLNSFRIDCDRPEVNMYRMNAAVKLQDDVYAVDMQNVLLRGTVLRNTGWVIGIVLFTGLDSKIVLNSGGTPSKRSKVERQMNPQVFLNL…
PC9H_000597	CDS	scaffold_1	1758589	1759039	-		hypothetical protein													MNSPPEPASPSTSTPSSGSPPPEEINFQVPESQSSGSFAAGVGQLLSNFVGGSSNPGPAGASSKRRLPAGGSFGNASSRDPKSRRRDDPRKYGSGGGPNWAEGPKREKEDLVDQHVVDLLRNQLGDPFLE
PC9H_000598	CDS	scaffold_1	1759156	1759527	-		hypothetical protein		PF05254	IPR007918	ENOG410PT86	S:(S) Function unknown								MAHSLSEECTPLKHKYDSCFNAWFEGYLEPAMNVSADAQQRETYSKQKAAEYEEKCGKIWESYRLCVQKAVKDKGLDTLLQQAREENPLTEPPPVDKSSSPSPNS
PC9H_000599	CDS	scaffold_1	1759766	1760929	+		hypothetical protein													MSNRIGARLLPFEPIHHIVEALVKRNGYTLWHLIPLYVERGTVYVDRTSHLLDYLSDWLRVGHLSAQALPPFYCSPSCQCILNLHLLFDEDDVTSAAEWLPDYFERLKNLRYLHVECYAAPLPALQTLGIVPLLAIDRIKRFDLECHDPELSLEEHRIGICAKTSIDRLFGSPPQALPLRRIAPAPPKHRSSRGLDKGLHRAALGDYGGLYRMTEPLHKRGSLKRVELDFLPQRFDVELSCGSESEVAKVQAFAPLLEGGQLVVDIRV
PC9H_000600	CDS	scaffold_1	1761371	1762906	+		hypothetical protein		PF10250	IPR019378	ENOG410PYYK					1 (o24-47i)				MLPRWRPTSTKELAPPALRRPRRLLLSILIAIVLFWVFVQPNGLFFYRRELFPKDKRAGSPPRFKEQWRWQESLPQHNTSLPYPEGKTGRYIKFSNQVTRLGWNNALNEILMNAHLAYASERAYVFQDYVWKPEYYPWAIPFMTFDRFRRWPHTPLSALIAGPTAGGPWDTDSSHMPRSVTEKYFDKVCPPSERRLINTKDIKPAINEASGIVIFETWQRLLLSAPERCIEIEAAPWPAESYPQTFDLYLWGSERILSLWDSFSKSPTSRLLATSPLVNSAVARNEHLFGGGDSYDRMMAMHIRRGDFKGACLELARWNSTFYSWNLLPFLPDKFTPPPGGSWGSNTPENTAVYLERCLPSSEDIVWKARRAREDLARHSTQTHGTQLDVMYLLTNEEG…
PC9H_000601	CDS	scaffold_1	1783148	1784183	+		hypothetical protein		PF00018;PF14604	IPR001452;IPR035521;IPR036028	ENOG410Q0JR	T:(T) Signal transduction mechanisms		GO:0005515		1 (o133-155i)				MSPRLVGRLPAGQARHIDHARRQIVSGSLTGPITITVVRPISSTSSPPSTSSAPGTVTVTTTTTRSSSSAVSTTTSSTSSSPPTRSLETSSVSSTTSSLASGFPVAMEGDTGKGVEGSSNGRDSSPQRGGLPAGAIAGIVITILLVLAALTVFLVRKRMAANRQSRSRSWKDNMFSKGINSEKYNAGGAGYGREEGVGGTITPYAFSPQPQTQHKSTPSKSIPRVPVPAMPTTSYNNPPTAGIVPTPTGEWPRSPPVVNGRTVVSTFIPSLPDEMSISMGETVRVLAEYDDGWALCMNGRGEQGMVPLECLGQDNSTQQAYVARDPSVARRASSLTGSGSVRRM
PC9H_000602	CDS	scaffold_1	1784656	1787155	+		hypothetical protein		PF00400;PF00646;PF12937	IPR001680;IPR001810;IPR015943;IPR017986;IPR019775;IPR020472;IPR036047;IPR036322	ENOG410PJ7H	S:(S) Function unknown		GO:0005515						MSNASSAHEEPTASGSGSGSSSNSSDSGHPTPLKPSSGNFMESFMASIGSERECEEFAFQLLASLPRSHLATIRRRIAPLLQFDLVGSLPIELALQVFSHLTAQTLWTCALVNRRWRTLADDPALWKALCDERGWVWKDSANANGFEANRTLQIGSEPWDDSDDEGMGASDEEDEEEGEATTTSVLSEVEKAKIMLTQMHAELDSGFASMSTAGGSSFLGSLSFTSSSTASGSGSNSNNATHLPARPTIFHPAGTFPAHNPEPSICEPNYKLLYQTHIRLYNRFVSSSYRLRILPKRGRERFSNAHTNTIYCLQLYTYPSGKQVLFTGSRDRTVREWNLQTEMVERVISGVHESSVLSICVHNGFLASAGSDRRVAVWDLTRDRLVKVICDHDDSVLCV…
PC9H_000603	CDS	scaffold_1	1787502	1788756	-		hypothetical protein			IPR001878;IPR036875	ENOG410PT9F	S:(S) Function unknown		GO:0003676;GO:0008270						MASSSTIQVTEGTYSHLRVLPHFTDLTPWGIYLGQFQSYGVYDRNHLHSALGSEQEVEDDEAATSNGTKRVCFNCGVESHAVYNCPKPRNHELIALSRDLYNFTKAQSSQVLIDYKRIHEVEGWRQQRLEWVNSFTPGEIRGELLIEALGPDALQDAESPAQEWLANMAIWGYPPGWAAPLDPQEEMRRRIMLGDDNPELSDDDHHDEPFQIYGEDEEPEQVYLRLFIPDMGLDSHHRTPGSNGTSPSKDEELRADELESSDSSSTMQTSSSSEGTRSPSPSSQQLQFKRWAKYPATHFASELLPIYNGTALPAVQPAFAQDSLDLGSQEMEYIRDVMWYEIVHNPKSWNDSDLPPPPSSTPPPLPPPPPEHTPPLPPSNTPPPLPSSQPPPQLPPSID…
PC9H_000604	CDS	scaffold_1	1789080	1789445	-		hypothetical protein		PF05768;PF13192	IPR008554;IPR036249	ENOG410PT9F	S:(S) Function unknown								MNRRFSHVARAIPRLTLFSGPNCSLCDIAKAELEKVRKQRQFQLEVINIQDTGQEKWKKKYVYWIPALHLEGKEIVKGRWDASDVEAAFVKWDNESGSD
PC9H_000605	CDS	scaffold_1	1789918	1794056	+		hypothetical protein		PF00004;PF07724;PF07728	IPR003593;IPR011704;IPR027417	ENOG410PM0Q	O:(O) Posttranslational modification, protein turnover, chaperones		GO:0016887;GO:0005524						MSGLLLALKDVIGDVEDDDEVDDDQIPGATEYLSQPQPDTSNASITLVHIPPAKIKSTSPDQSPISAEQSIGHTSFRATPDLLSPVGSEVSNLPSVPFPLRIPSRAFRRDDSIDSGYADSWHSPRPLVRSPPRSPALSSTFDILVSPFGTPSARVRGGTPAPVSPLTLSFDESASAPPSPNSDDVDSNVGSPPRIMDDDEEDGDFMHDDSLTSRPIAIQLGGPDSLSPPPTLVDVDGDFISQEIDEHGSPELDPLSAAERSWDLSENNATAIFSPITSPINEGALNIRQSLNVQNPTEWLTAGSTSFNQDDIALNSSPLLIPVHDAIPEHRETSPLTPDFIPPHSAVSSESSSASECVTADFLDDEDQTGTSSIFSPTARLAYMSSPEPAINLASGSMD…
PC9H_000606	CDS	scaffold_1	1794900	1795899	+		hypothetical protein		PF14604	IPR001452;IPR036028	ENOG410Q3E3	T:(T) Signal transduction mechanisms		GO:0005515		1 (o6-31i)				MPTSQVPVVVGATVAVIVVLVAIIVGILLAWRYTVRNRKKREAAEKATSREAKEDVFAAHPPNPILRPYIPPAESGVTWVPQLRADNTKALPSPSLEAVEVKEKDLAEQISNAVREAKSPPPSYSTANLTELKAMKQLNSLQSSPESSPESSPDHTPEPSPQPLRSRFSVASPVEESVEIHLPNKPKRRTAASLPPTPATPFLTVAFSVEKPETSVSTFPPTPSPRSESFQNIDVPSRHSVALKGKNRQMVVVHTFEPERDDELGVEIGETLTLVQEFQDGWCLVQRQGQDAPKGVVPRFCIQDQNRPTLLQVPE
PC9H_000607	CDS	scaffold_1	1796254	1797104	-	PAM17	TIM23 complex component		PF08566	IPR013875	ENOG410PMZU	U:(U) Intracellular trafficking, secretion, and vesicular transport		GO:0001405		2 (i56-75o95-119i)				MSAKLLERNLLHRASGLRLAFKTGSARATRFNSTTSPTNQLNWQEFLKLRGSRRKWQAVTTIPASVLGFLGGVAYFGNLETDPTKLIMGVDPFMFYGFCTVGCVGAGALIGPTIGSAIWRFSNRNSIALIDVREREFLQHIAKKRVDPTLQSPTNPIPDYYGEKIGSLHQYRQWLRDQGKYRRKHVLPEN
PC9H_000608	CDS	scaffold_1	1797471	1801423	+		hypothetical protein		PF00176;PF00271	IPR000330;IPR001650;IPR014001;IPR027417;IPR038718	ENOG410QDFQ	K:(K) Transcription;L:(L) Replication, recombination and repair		GO:0005524		1 (i344-364o)				MSCFGSRSSFLLELEFLIQKHFVVVTYQLEPEFEVTARVYLVPYDLSNVKGSLRKRPTTVLNPARRYLKTLIPMLSLNPVHWNFGCTDEAMRPFHEPPIQCTLAQIYSNLPSPNPQLTGPSTGTIPKLLDFSFDIEETLGLRSRLYQYQRETVARLIQREGGKASIPDPLYVPIKSVTGTIFFFQPGTYEVLQERPMVVPTTGGILCEELGTGKTIMILALILATRHELSTPEESITDVRPILTSTALRYFPSAPYDQIRQRCGRDRHALNDDDPAIRVPSLVELLIHVSRTSPQPATRYNEALESAGLNKLIRATVPFYHHYLGDPTAYERARRDQSRPAPRTIYLTSATLVVVPSNLIAQWYREIHKHCQVELRVLQMRTNSTFPPVKSLASDYDIV…
PC9H_000609	CDS	scaffold_1	1801628	1802821	-		hypothetical protein				ENOG410PSHP					4 (i7-27o83-103i115-141o147-169i)				MLPPRSYLFFGLNAIRAISVISLLLVFSSTVFVMVTNIKAVNAFEAAKQNGDFSTNSTDPNAVNMLDCDYIEGSTVPNQAAGVFWAVVSSLLIIFQVIVLLLSELSWPMKFFDRFFPVLGSNFGLGALGIFQCLIGAQILSHHVDDFTLGAAMLLFSVGCLNILLGLIFRESAKGKRSIVAWRNEGKGVLPIATGSTSPVFVNALPPQFAPALHNGHPEDEKARYVPYPEYASPILSDKATLGFGRQGEKAAGLRGFILQRPVESLPRYAPPPPPASSPTPQASPQVHAKRISIRSSTSSFASPSQPQSPALSYEDSRPTTPVNNHAAPAFRSSPTAL
PC9H_000610	CDS	scaffold_1	1803767	1805554	-		hypothetical protein									1 (o192-214i)				MSCVTTPSATETHLVTLTSQSVSNSPSVTTLPDSTSTTIFTTCALTGTASDSSAPGPTCLVTRTVTSTAVIPGDEVTTQVPFTVDVPFTSTSFSTLFGTSCTSQPVSDPPTPQPPTTAPPTPPTSISISTPPPETFTSQSESTLPNGVVTTTLLTVVSTLPPTSIVVSTTMPGQSQQQDNNNDDNSANLGPIIGGTVGGFFGLIGIVAVVWFIMKRRSRWDDIFDKEEETMQETTRASGNRFSLDVDNEPKPYQYGLVGHVTSPQLHSPPNSPPFGPVIGGSVHNRRPSSTGIPAPLSLSPSFTTSAGHSAQNTATNMTALSSRPSSAGSMQPLFTAGQQQGRMTNEFGTRPPSIHSHSHSSSITSPPTTFANWGNNVNITGTGSFMGPAAAAGGVAAV…
PC9H_000611	CDS	scaffold_1	1806071	1806896	-		hypothetical protein													MSIETPESPSRSLVVRIPRPSSTSSTDSPLASSPSTSILTFPNASTSSSSSSSAGTPPTATLSVKFAPLPDLSKRKKKYHHPLGVSARSDIMRRRRAAAEGNDYSYRDMANNSTDQQQQQPSAPAWSEEDAKVEERYRGRHRSSRRRNVMGDEEDELLEDPLITLGRMVKGASKSLWRKVANKRGDAVGGSEGDSEGGKVAADGEDIPAGTVDDPLPAAPELNEATTTGAQRPRKQSSASAKGLRDRKQSSGSVVDIRLPPHPVSRKASLDSSM
PC9H_000612	CDS	scaffold_1	1808301	1810053	-		hypothetical protein			IPR007271	ENOG410PJIB	G:(G) Carbohydrate transport and metabolism		GO:0016021;GO:0000139;GO:0015165;GO:0090481		8 (i72-92o104-125i232-251o278-296i308-328o358-377i384- 402o408-426i)				MYHRPYPTVRQGSSSGSVPTVSQTHTPSPRPTPLLPPSPPTYSSSLKGMSPSSPILQESPSGPTIFGMPLKYVSLVTLAVQNAALSIVMHYSRVSTPPSRSYSPAAAVLLNEVLKGSISFVIALWRVYSNPSYSYPPTPASFGTPNPSRQRSSQLIPQILYPFFHVCSEVFSPDCWKLSIPAILYVIQNSLQFVAISNLPVATFQVTYQMKILTTAAFSVALLRKRLGPTKWLSLFFLAMGVGIVQLQTATGPSKPNHVGSAHDSAPLHIHIMNPLKGFAAVTAACFTSGLAGVYFEMVLKGSKADLWVRNVQLSLFSLIPALLPIFYSNYSHSHVPGSPHEIPTSFLQELFKHFGPWAWATVSVQVFGGLVTAIVIKYSDNILKGFATSLSIVLSFLA…
PC9H_000613	CDS	scaffold_1	1811047	1812871	+		hypothetical protein		PF11709	IPR016712	ENOG410PT9K	S:(S) Function unknown								MSEAAPKLTSGEFSDVPCWCLHPFFVASVGLMSIASTSTSKVLRPGPAPSAFTTLLHKSKFASYDPYIKQVYSAPPASAHRGDYGLKRPIPLRRKNAFITVKSVDSRAQQTEWNHGESQARFIRRWEELGVLPKARAGGDKGWERTLGPEATEWLVDSEHCDWQEVKQQPGNSSRNLLGSTMPTSLLDGRGYTKKLEANKKESDAREGGHLVPNLDSMNPAEFKRFLNKCRELRPKFIEYLASVTELKGKSLYDISQNTAADHHRQFLQRHTRELFGYSSSDKSQQPSSQLPRPLPNSCRIEQKPHPTGALLYSHPSRMTNYFTSPSQPGLVVQELYVDKRKAQGNDSLLTPVTSAGAMYGRGSVNTKENAYFASFAGMTAILKRKNAAGKKPLLNINS…
PC9H_000614	CDS	scaffold_1	1813117	1815156	+		hypothetical protein				ENOG410PZSS									MSPRRAAKAASANIAKQLDSSDSDDEEHYGARVPTEKNRRLSSASSRCRAKAHIATAAGSSPRTPRPLSTKGVTPRPRKRPLAPSGSDVEDLTREPLAQPFPVFEESPARKKQKLPLTDTEDHHSRPLSVRNAEDVDEELPDPTSAFSRMNYSVRATCSTEGTTPETLLEGSLDTEDAYEEQFWEPPEADPCIKIPGEPILAQTKKGDVYWPAMVLDYIPPRERNEKEGKYRVLFLDNAERCIHRARFYIAEDDEFGTCKLGQFTSQFNEVEADEDFVASPIQQTGHRPSSPVPTDPPPSSSEFYELSVHEQLSYTKPILQAILMGTYTPAAERHNGFIAGGNARDIVVQNAAMRGDMDPRDVSELQNRLMEWCLRDERYARRMEGDAVVLTEPPIKPR…
PC9H_000615	CDS	scaffold_1	1815266	1817593	-	YND1	Golgi apyrase	EOG092R011X	PF01150	IPR000407	ENOG410PH76	F:(F) Nucleotide transport and metabolism		GO:0016787		1 (o559-579i)				MPPGNVVDPWLAGRRFGIVVDAGSSGSRLQIYSWTDPRLVQSEKGTRIPNSLPKVDKGTKDGEGWVSRIQPGISSHADDPETVALHLAPLLNHARETIPPSLHHETPLFLLATAGMRLLSPEKQATLLLHTCHFLRHHSDFRIEEQSEAGPCGTSVRIITGEEEGLFGWIAVNYLMDGFTGSSADKTTYGFLDMGGASTQIAFEPSKEHQGDTKNLIDVRLRLLSGQEIHHKVFVTTWLGYGTNQARERYVGKAINDYEAKNDPARGDTIPDPCLPKDLQLIEEPIHQGMSTSHTRKQHKMLGTGSFEQCMKSTSSLLNKQAPCPDTPCLMNGIHVPPIDFSVSKFIGVSEYWYSSEHVFGLGGPYDFVQYERAASKFCSRDWAGIVKEHEHSRAQDRL…
PC9H_000616	CDS	scaffold_1	1817738	1819884	-	ELP3	Elongator subunit	EOG092R05HF	PF00583;PF04055;PF16199	IPR000182;IPR006638;IPR007197;IPR016181;IPR023404;IPR032432;IPR034687;IPR039661	ENOG410PG0I	B:(B) Chromatin structure and dynamics;K:(K) Transcription		GO:0051536;GO:0003824						MVQRTKTEGPSQAETLLRVTSGIAAELIKAHDDNQSVSLNEIRLKISKKYSYGGVPRLVDIISAIPDEYKKALLPRLRARPIRTASGIAVVAVMCKPHRCPHIAMTGNICVYCPGGPDSDFDYSTQSYTGYEPTSMRAIRARYDPYEQTRGRVEQLKSLGHSVDKVEFIIMGGTFMSMPEDYRGKFVAQLHNALSGFTGTDVDEAVRYSEQSKSKAIGITIETRPDYCLRPHLSQMLRYGCTRLEIGVQSVYEDVARDTNRGHTVRAVSESFHLAKDAGFKVVAHMMPDLPNVGLERDLEQFKEYFENPAFRSDGLKIYPTLVIRGTGLYELWKTGKYKNYTPNVLVDVVARILALVPPWTRVYRVQRDIPLPLVSSGCDNSGNLRELALNRMKDFGAE…
PC9H_000617	CDS	scaffold_1	1820137	1820556	-		hypothetical protein			IPR009060;IPR038922	ENOG410Q3E5			GO:0005515						MSRNGRPEPEVIMNYADGFAYSKGKMEEAFRPGGILEKPPTKPAKDPNAPQIKREDIDLIVHELGITRAQAEKALAENGGDVSKALLYLITPNSNASA
PC9H_000618	CDS	scaffold_1	1820698	1824421	+		hypothetical protein		PF04851;PF09416;PF13087;PF13245;PF13604	IPR003593;IPR014001;IPR018999;IPR027417;IPR040812;IPR041677;IPR041679	ENOG410PHFX	A:(A) RNA processing and modification		GO:0005737;GO:0003677;GO:0005524;GO:0008270;GO:0004386;GO:0000184						MDSFDNFQYDSNSSYGGMGIVDDTSSIYTANTRDDSSLDLTTLSLSEHDGAEHASKHRVNGSDVASRLDEDFDSVLDDLKEEDSVELPPHACSYCGIHSPASVVKCLICSKWFCNSRGNTSASHIVNHLVRAKHKEVILHAESPLGETIPECYNCGSKNVFMLGFIPAKSDTVVVLLCRQPCAAISKDISWNAALWAPLIDDRSFLSWLVKPPSETEQLRSRQISFSQINRLEDLWRENANATLEDLDKPGVDDEPQHIEIRYEDAYQYQNIFGPLVKIEADYDKRLKESQTQTDVIVRWDLGLNQKRVAWFVLPKLESGEVRLAVGDELRLRYVGELHKPWEGVGHVVKIPNNISDEIGLELRRADGVPSECTHNFAVDFVWKSTSFDRMQLAMKTFA…
PC9H_000619	CDS	scaffold_1	1826755	1828099	-		hypothetical protein				ENOG410Q4AN									MTEYTTSSQAYREYMSSRERTARWVNAHSPTKTRFNSPSVAPSVIDGLVPSSPPSEADSSHSLPPQMVLRFPDGRPDVPIPQNPDASASGQVSRAHTLPQAAGARRPHPDYSPPSGPEEIRILPSRTGQAPPPTSQTRSQSLPRNAYSPSSRPSIQAPPPPPPGAMHRSKPRLPLALPPPVHTPPESAPLPLPAPQPQVIFDPQHMPNSSAWHPYTDKVPNRRQPIKQHGHPPAIIYAPSHHSKSRYAPPAILSHPPPRGPGGVVYSHSIPQYPTPYPSAMSSSHLTSVHEEDARRGMSRPRHDRSRSATLADDPHHGHHSRRSSVSSFVSNGSGSTYYVLPSARQKVHIIAPEPSIYTATSTTKSPSSPKRPFFKRLFGFNKEKLTSDSSKTSTRGGG…
PC9H_000620	CDS	scaffold_1	1828422	1829212	-		hypothetical protein								SignalP(1-24)					MARASFLELARVLILSGAFIKVAAQQAQTSLFIPGFDPQPLSADAIGVDGEGRTTWALQAGQATDPADIGIPPSATITYVAGPSNVGYTMVFTGDSGSPITVAYDCSLSGDQAVCSAEAGGETATATLTQDPFLVQVGTTLAANAPTSTPVAGSSRPGGSSGSGSVSPTSIGSPAPATQSNGSRQTGVGVAGLSAILVSMVAFW
PC9H_000621	CDS	scaffold_1	1829677	1833164	-		hypothetical protein		PF00172;PF04082	IPR001138;IPR007219;IPR036864	ENOG410PMHF	K:(K) Transcription		GO:0005634;GO:0008270;GO:0000981;GO:0003677;GO:0006355;GO:0006351						MPSSPFGYTSYYLPPAHHHFHSSYPDQISIPHHQDYPMSPQESSMSHSMQPPPSPSIPIDPALALYPPYYSYQQQAQHIPHHLSLPPNYSSPSSNGSDTIGTPPIEHMSFSSNGNGKRPASAAASNDSRKKVRKDDDLDVARSPTIEKEEPKAKPTRGSRACTVCRRLKMKCVGAEQGPPCKRCQSGNHECIFEESNRGKRSSKKHELLTRSLRKMEKTLDTVLRSIGNPTIASGMISRSPSPSAQTVTTQALLGSTPSPPASPFPHGQRPGSPKLHSLPDNALNPLGLLAEASLANRRATVSNSAALAARPSSKDGPQSLGVASANYFRPGPMTILPLRRLYIERQVQPEMLSFTTTEEVVALFNMFVSHNGRHMFANILDRNFHTPSLVCSRSPFLL…
PC9H_000622	CDS	scaffold_1	1840355	1843226	+	CDC4_1	SCF ubiquitin ligase complex subunit cdc4		PF00400;PF00646;PF12937	IPR001680;IPR001810;IPR015943;IPR017986;IPR019775;IPR020472;IPR036047;IPR036322	ENOG410PH5S	D:(D) Cell cycle control, cell division, chromosome partitioning		GO:0005515						MSPNQRPQLVLQPSVSTTRVVTTTTTTTTYAPITLPPLPPPSSPKDPKNYPLLHTTLPRSLRRFPLVFPGGAHATFRDAAEGDEEMQEEEEMVGGSGWRMLRHDEDQENVKTVNLTEAVERYGKKRSHGSDNMMEGVETTSEFEIGNPAPPRKKARASGLPPISTVNAAAPPSPLPSPHGSPTPESIWPSAPPSGASSPLPQAPLQPDLSLTTLLTLPSLLAHFTNLPPALQSHLLLTLLRHSPLPVLRTLHSVLTPTLARDFLTLLPPELVSQILSHLPFSTLARASRVSKAWRAIIDSDPVLWRDLLHSTKTWFGRDSEQAFANAVLARRAREHPSPTLHDPLPLPHPYKILFKSRHLTRTHWINNREPKHLSFPAHGSSVVTCLLFSHGRIISASD…
PC9H_000623	CDS	scaffold_1	1844024	1844777	-	CYP1	heme binding		PF00160	IPR002130;IPR020892;IPR024936;IPR029000	ENOG410PMZB	O:(O) Posttranslational modification, protein turnover, chaperones		GO:0003755;GO:0000413;GO:0006457						METVVLETNMGEIVLELYWDHAPKTCKNFAELAKRGYYNGTVFHRIISDFMVQGGDPTGTGRGGTSIYGQKFEDEITPELRFTGAGILAMANSGPNTNGSQFFITLAPTPYLDGKHTIFGRVASGMRVVQRLGAVAVDAQDRPREEITIRKGRVV
PC9H_000624	CDS	scaffold_1	1845275	1845715	+	DTD1	D-tyrosyl-tRNA(Tyr) deacylase		PF02580	IPR003732;IPR023509	ENOG410PPBZ	J:(J) Translation, ribosomal structure and biogenesis		GO:0005737;GO:0002161;GO:0051499						MWRSNVSDIDGDILCVSQFTLMANTSKGNKPDFHLAMSTEQSKEMYGALLLKLSGMYKAEKIKDGRFGAMMDVTLTNEGPVTLTIDSRKDTTA
PC9H_000625	CDS	scaffold_1	1846607	1848551	-	PGS1	CDP-diacylglycerol--glycerol-3-phosphate 3-phosphatidyltransferase	EOG092R06X8		IPR001736;IPR016270	ENOG410PHGG	I:(I) Lipid transport and metabolism		GO:0003824;GO:0008444;GO:0032049						MFSSLRPLCRRSTRFAFWATACETTNVRRAHSYHPLINGFVSALQREQPCLAVSPRRIQVLSQPSSFYETLLAMIQRAKSRIFISSLYIGSGESQLIGALEEALTRSPDLKVFLQLDLNRSTRPGKLSTAHLLLPLLEKFPSRVSVSLFRSPSLRGVLAKVVPPRFNEGWGTWHAKIYGADDEVMISGANLNDSYFTDRQDRYIHFDGEPQLADYCFSFLRTVSTFSFQLSPATHVRSSKYSYRHEDYTLDWPDASTHPHEIQSKAADSFTSFQAHQKELSISRRTPSHPSSSSEEKVLLFPIIQAGQFGIREEESSLDLLFRHVASHSTPESGFDDVRQRPLMDLTSGYFGLNKRYQDLVLSSRDIDCRIICASPKANGFYGSSGISGRIPEGYTYLE…
PC9H_000626	CDS	scaffold_1	1849494	1850323	+		hypothetical protein									4 (i5-24o30-55i75-99o105-125i)				MPILLWAMAGISFCGFLVSLGLLLNQHLFGWAIATACFLSLNAIIYFLISASLYFSLRTARKEKTSSTKKLLQRLMIWTLVNGFIFTFAGIASVVLFVVRLDSVLWVGALSASQQFFSVSFLASLNARKSLLKIANTNTEDTAIKPISVINVRPSRLL
PC9H_000627	CDS	scaffold_1	1850788	1852189	+		hypothetical protein		PF01419	IPR001229;IPR036404;IPR036691	ENOG4108PF7	S:(S) Function unknown			SignalP(1-17)					MLPLSLVVLGCSIPCLAAITQGSFSVLSYNVAGLPEPLSSSSPSTNTPLISPRLGPFDVVQVQEDFNYHAALYASDNHPFRTSTSGPALFGSGLNTLSNFPFIELQRVKWKDCFINEADCLTPKGFTFMRIKVADGAWVDFYNLHADAGSQTGDINARKSNLAQLAAFAQTWSVNMPIVIYGDTNARYTRDNEALHSLLDGLNVQDVWIQVIRNGVEPLPGSPANACPSTFPSGTPQSQMIACETVDKIFIRSSAAVTLTSNTITNENDAFLDSAGGPLSDHFPLSSVIHWQLSSAIRLADPVGGANDDPFTDVSLAAPGSVPRITSITLRGGNRLDSVSVAVQYTNGTTATATHGGQGGSPSTLALQSNEFITQAQICSGSHLSSTSVFFLQVTTNQG…
PC9H_000628	CDS	scaffold_1	1852584	1854869	-	ILV2_1	Acetolactate synthase, mitochondrial	EOG092R03NH	PF00205;PF02775;PF02776	IPR000399;IPR011766;IPR012000;IPR012001;IPR012846;IPR029035;IPR029061;IPR039368	ENOG410PFW3	E:(E) Amino acid transport and metabolism		GO:0030976;GO:0003824;GO:0000287;GO:0003984;GO:0050660;GO:0009082						MSFATTKMRSPATQAPVAFVRSRSTVAPAGSSMIEAKSRVREHARNISRSTVNKAAPAPVVRPAPAPGFQQVPTRNNLNLPMTGPGPVPAVPLDHTFVGLSGGQIFHEMMLRHDVKHIFGYPGGAILPVFDAIYNSPYFNFILPRHEQGAGHMAEGYARVSGKPGVILVTSGPGATNVVTPMQDALSDGVPLVVFTGQVATSAIGSDAFQEADIVGISRSCTKWNVMVKDISELPRRINEAFKIATSGRPGPVLVDLPKDVTASILRTPLPYKATTPGSNLSLPQNPLQMIEPPTDVNLIRQAAELINQAQRPIIYAGNGILSSPMGPKLLAQLVENGNIPVTTTLQGLGCFDETDERSLHMLGMHGSAYANIAMQQADVIIALGGRFDDRVTGKVDTF…
PC9H_000629	CDS	scaffold_1	1855519	1856487	-		hypothetical protein									1 (o20-42i)				MPQDEEGRDFGPHNGHLGTSWEIAVIVVFVVLLVAVVSTLIFHVRRKQRRKRQEQYDLERGRREQAEKELNTSAGDRNSRRQSSFANNSAASLPRRLPRTLPSVFARAGRNCPTGLPYIRAIVIFDLASAAAARWWRFSHTRVDKPSECRLPCQDAIYSGAGGLGGIEGQGSKA
PC9H_000630	CDS	scaffold_1	1856907	1858080	+		hypothetical protein		PF01557	IPR011234;IPR036663	ENOG410PGIV	G:(G) Carbohydrate transport and metabolism		GO:0003824						MSSLTSFIFRQGKQIVAIGRNYAEHAKELNNKVPKEPFFFLKPTSSYVFNGGNVEIPDGIVAHHEVELGVVIGKTGRDVSQADAESLIAGYALAVDMTARNLQDQVKKRGLPWSAAKGFDTFTPIGEFIAKSAIQDPHNLNLALKINGVVKQDGNTSDMIFQIPQLIEHITSIMTLAPGDVILTGTPSGVGPVAAGDKIECTMSDPASGKILSTLNLLAINRKGGYKFTPE
PC9H_000631	CDS	scaffold_1	1858233	1863818	-		hypothetical protein	EOG092R05TB	PF00928;PF01217;PF04499	IPR001392;IPR007587;IPR011012;IPR018240;IPR022775;IPR028565;IPR036168	ENOG410PH0E	D:(D) Cell cycle control, cell division, chromosome partitioning		GO:0030131;GO:0019903;GO:0006886;GO:0016192;GO:0043666						MISAFFIFSQKGEVLISRLYRTDFKRSIADVFRIQVISNSDVRSPIITLGSTSFFHVRINNLYVVAVTKNNANAALIFEYCYRFINICKSYFGKIDEESIKNNFVLIYELIDETIDFGYPQNSEIDTLKTYITTESITSAAIAPEESSKITSQATGATSWRRGDVKYKKNEAFVDVIETVNLSMSAKGTVLRADVDGHIQMRAYLSGTPECKFGLNDKLVIDKNERGISDAVELDDCRFHQCVRLDEFDATRTISFIPPDGEFELMRYRSTSNIKLPLRIIPTVTEIGTTQVSYAVTIKTNFNNKLSATNVVLRIPTPLNTTAVDCKVGSGKAKYVPGENVVVWKVPRIQGGQECTLSATAELTSTTHRQVWARPPIDVDFQVLMFTASGLIVRFLKVF…
PC9H_000632	CDS	scaffold_1	1864419	1865001	+		hypothetical protein													MTVTEFAKFKVLPPFTCSSPEILEFLADVGKKQYAFSGYPLRFYQDVNSPDAVYLVSGWDTVEDHGKWSATDASRKVIERCMLEKLVAIEGLAHLEVEFPSLPGEWKGIAHVVVEKEGNPVADANVEESFKNATHQIYVARDQTSPCGEVFQLAVLKDDVTGLEGKWDGVANFLAVN
PC9H_000633	CDS	scaffold_1	1865287	1867896	+		hypothetical protein	EOG092R050B	PF01909;PF03828	IPR002058;IPR002934	ENOG410PJHK	L:(L) Replication, recombination and repair		GO:0016779		1 (o455-473i)				MPTVEPIAKESRRERRLRRQREQGQEASAPAPDAQSKSNNINKHGPTKPPKTGPHSHSTSKPSSKNSSAKRRSKSTSRYASPSSSSGSPSTLLLSSTADFKGLESTSEIEEGEMDQPKAGPSRPRRSMTPPAANKNNSQASAKHGFDSQIDFIPFDTEDTSAPLTRNGKDMSSSKGKSGSDVRADERRGDMSGKGKARDVDPPTREWDRGKPPLSDDRDRDRDRHARRRDRDTDRHADGRGRKRDHDRIDENGDTRRDETRRTAHYTESLKAPWTKDVDWDACNNVAEMMHREVEAFVKWASPTHEEDEMRALIVSQITKAVTSAYHDAQVHPFGSFATKLYLPLGDIDLVILSPSLQQGYKDYVLRDLAHVIKRARIADQVTIISRARVPIIKFTSIH…
PC9H_000634	CDS	scaffold_1	1868182	1872419	+		hypothetical protein		PF02714;PF12621;PF13967;PF14703	IPR003864;IPR022257;IPR027815;IPR032880	ENOG410PH62	S:(S) Function unknown		GO:0016020		10 (o16-37i94-114o145-163i415-434o468-488i508-530o550- 579i621-645o665-690i702-720o)				MSVSAEGAASATTNKFVTALVTNLGLLAVEVGAFVVLKQRFGRIYQARTYLPPVDKRSQKLPSGPWRWVPAILHSPLEDIIHKNGLDAYMFLRYIRLLIIIFLIFTLLTFPIIIPLDAIGLDTGRTGLDRITWSNLADSDEQIRFVGHIILAYLLTGIVVFMIRREMNHFVHMRHQFLLSESHSRLPQARTVLITAVPDELGDEHALRTFASFTPGGVDRVWLYRDTKALNKIFEERRKLCTKLEKAISKLLRKATETWRIRERVHKKDVKLRKKQQKKMKDVEKDHNLLPHELERPPASFELLDELVPRGERPRHRVGLLGLIGRKVDTVDWCKEEISRLNIEIGEARSHVVNGKFLGSAFIRCRLQMGAHVLAQCVSFHEPNTMYNKWMEAHPKDIV…
PC9H_000635	CDS	scaffold_1	1872620	1874673	+		hypothetical protein		PF00884;PF01676;PF06415	IPR005995;IPR006124;IPR011258;IPR017850;IPR036646	ENOG410PHC1	G:(G) Carbohydrate transport and metabolism		GO:0005737;GO:0003824;GO:0046872;GO:0004619;GO:0030145;GO:0006007						MPVEIKNKVCLIVHDGWGVATTPGLKGNAIEAGTTTNMDTIGKEHSYRQLAAHGTAVGLSDGLMGNSEVGHLNIGAGRIVWQDIVRIDVAIKKRQFHKNENIVKSMERAKAGNGRLHLLGLVSDGGVHSHIRHLFALLETAKEVGVPKTYVHFLGDGRDTAPRSAAGYAQELLDFMKKEEYGELATIIGRYYAMDRDKRWERVKIAIDGLVKGEGEKVDGPDAAIKAIKSNYEADVTDEFLKPIIVNGDEGRIKDGDTLFFFNYRSDRMREIASVFGLPDKPMEVDIPEDLSITTMSRYNAEFPFPVAFPPQPMTNVLAEWLAKEGVKQAHIAETEKYAHITFFFNGGVEKQFENEERHMIPSPKVATYDKEPKMSVQGVADKVAEVVRKAEHEFIMCN…
PC9H_000636	CDS	scaffold_1	1876498	1877591	+		hypothetical protein		PF06330	IPR008949;IPR024652	ENOG410PRZG	S:(S) Function unknown		GO:0016838						MTSATATVPRIQEQTLDHVRQCVNRFLTECKIPYVVKPFDQEFHEACCEEAARRGCPMEDAADIRSVRPKLVSGVGMAIYTFGHLNDRSIQMYIALYTGLLMYVEDYMQHDVEIVSAFNQKYIRGDPQGHPVLDALAALLHELPQRFEPIVANIILTSALNYITAVWLEHQTETLELSPYATSFAGFSRWISGSSEAYALFVFASKLPLLVYIQAIPDMMTFLNYSNDMLSFYKEELAGETANHVSIIARCEGKTKEEVLRRITEDTIACHSRLRKILMNHREASEILDQLSEGYISFHASLGRYRLEELL
PC9H_000637	CDS	scaffold_1	1877924	1879033	-		hypothetical protein				ENOG410Q3DD									MDPNNLPDTQQILTTPARKRGNRENETPQQRIKREKAAERQRRKRERDRNAAGLGLISYQTDTDSAQVQQPQAHQISVMQQTVAQPSPPQQMLSPDLTPEEASRRERVRAAARERQRKHRLLVKQRKMRELGLEMAPDMVPMEEMRYPDGHYQQVLQHELQQPQIDPPFPPGPPIGGQTFASTLLLSFSSTPLLKQHLLRTLNMTNEELASLEPIIAESWDRWDHQRRMHGHPGATGFQVEMGPEGHPLPPNSAPYPAPVTASADPNHPSNEFRARFHRPLVAPTPFRTFTDSQGAAASTPGSTNGSLQASPDSAVDPQLSNPTQNGTSEGGS
PC9H_000638	CDS	scaffold_1	1880027	1880751	+		hypothetical protein		PF00098	IPR001878;IPR036875				GO:0003676;GO:0008270						MFLATTAEEKATFPGTAQAILSQRHATNVAQKGISRGNAQMLPQEAATLVSVVDLVVNATAAVNPDISLEHAPSLLVEAQVPSAVATEVEVTKRPVTPVVVSAICLGTVCKEASATTAHKLRECPQPQKRACYSCGSEGHISRDCPNAGAADAAA
PC9H_000639	CDS	scaffold_1	1881093	1881799	+	COX5A	Cytochrome c oxidase subunit 5A		PF02936	IPR004203;IPR036639	ENOG410PNPD	C:(C) Energy production and conversion		GO:0004129		1 (o109-130i)				MQAAARLARIPRLAIQRTAAVRCMATAASHVSASASPSSTPKQSVIPLGNVEAQWANLNQDDKSLVIEQLEELQKKDWKQLSIDEKKAAYYVAFGPHGPRTPIHPPGTILKIFLGTMGLVGAAGALFLALRQMAPPPPKTLTKEWEEASNERAIEQKMNPITGITSEGYSGKGFVQHK
PC9H_000640	CDS	scaffold_1	1882305	1883719	+		hypothetical protein		PF03171;PF14226	IPR005123;IPR026992;IPR027443	ENOG410PP6F	Q:(Q) Secondary metabolites biosynthesis, transport and catabolism		GO:0016491;GO:0055114						MPVLASSPYPAYPPFPEDVPTHPLLTIDYNLIKGGDEKEKDRLFVAATTAGFWYLKNHGLDEELDEMFNLGIQVMKAPLPELMKYEQGDSGLSAGYKAAGAYITDRTGGKDAVEFMNITQDDVFAWPKVVRCSYPSIVEASMESVIRPFSRKAIDLNLVCMDVLNDKLGFPPGKFRELHKVDALSTSEARIVRTPPPPPGGWNKNVALGAHTDFGSMSLVHNRLGGLQVYAKGSDRWQYVKPLPGHVVCNVGDTLNILSGGVLQSNLHRVALPPGAQSAFERCSVTYFTRPSDDVVLRALTEDSPLVAEAASKNNQETGMNFEPGVTAGQWVARRIKYVRVNNHKSPEDWFSARGTEHQPLIT
PC9H_000641	CDS	scaffold_1	1884440	1885857	+		hypothetical protein		PF03171;PF14226	IPR005123;IPR026992;IPR027443	ENOG410PP6F	Q:(Q) Secondary metabolites biosynthesis, transport and catabolism		GO:0016491;GO:0055114						MPVPTNTNSKHAFPPFPDDVPTHPLLIVDYALIKAGDEAEKNKLWKAGTNLGFWYLKNHDADEEVNGMFDMGAATMDLPLEEKLQFDQGDSGRSAGYKAIGANAVDETGQKDNVEFINVSQDDAMAWPEIARRTYPRTVTAVMDSVVQPFVRKSAEINLTLMDVFNDKLGLPEGTLRRKHTGELSGSETRCIKSPPKPDWDEKTASLGAHTDFGSLSFLHNRQGGLQVFVKGTDKWQYIKPLPGHAVCNLGDAMAIFSGGILRSNLHRVVPPPGAQAAFDRWSLVFFSRPGDSVVLRALKEDSQLIAEAAEKNQRENGTNYETQSTAADWFARRIKYQRVKNYKGPESWQQSRGTEHKQRV
PC9H_000642	CDS	scaffold_1	1886277	1886611	-		hypothetical protein		PF04627	IPR006721;IPR036742	ENOG410Q06I	C:(C) Energy production and conversion		GO:0000275;GO:0046933;GO:0015986						MSSANWRSVFTFNKYSQICARAVRTSLNDTARLAAERRGVTSLRYQNWEDGQGGQQVLLNPETDKGTPKSAAV
PC9H_000643	CDS	scaffold_1	1886807	1887864	+		hypothetical protein		PF00025;PF00071;PF01926;PF08477	IPR001806;IPR005225;IPR027417	ENOG410PP5J	U:(U) Intracellular trafficking, secretion, and vesicular transport		GO:0005525;GO:0003924						MSGLSWHYVFKFIITGDAAVGKSSLLIRLTDQRFLVNPDPTLGVEFGSKLIEIPEENKVIKLQCWDTAGTESFRSITRSYYRGAAGCLLVYDVTSRRSFTNARMWLADVREHADPHLTCILVGNKVDLCEAEVAGSDPASLPPSALKQREVPTEEARLWAQEEGLLFVEASAKSGQNVELAFEQAAKDILQKIRNGVFDDNRSPGVKLSKPADNSLSLEPTKAKGSCC
PC9H_000644	CDS	scaffold_1	1888277	1888961	-		hypothetical protein		PF00782	IPR000340;IPR000387;IPR020417;IPR020422;IPR029021	ENOG410Q32K	V:(V) Defense mechanisms		GO:0008138;GO:0016791;GO:0006470;GO:0016311						MSCVKVTQMRSNNPHLHLHHTHSQLPMQAWPSPVSAGHSAHRALHSPSSRNTRPSEIIPHLFISDLSTAESKTALATMGITHVVSAMRGFVAVPAELPTHRIQVPLDDFPFAELVAHLPATTSFIRDALGNPNARVLVHCAEGISRSVSVVAAFLIAQYGWSPSQAIQYIKAKRRVADPNPGFVGQLHEYAELLRRTPS
PC9H_000645	CDS	scaffold_1	1889779	1891308	-	TIF1	translation initiation factor eIF4A	EOG092R0BY1	PF00270;PF00271;PF04851	IPR001650;IPR011545;IPR014001;IPR014014;IPR027417	ENOG410PFHJ	A:(A) RNA processing and modification		GO:0005524;GO:0003676						MSTEELQDVAENEIESNWDQVVDNFDNMDLKPELLRGIYAYGFERPSAIQQRAIVPVVKGHDVIAQAQSGTGKTATFSISILQQLDMSIKGTQALILAPTRELAQQIQKVVIALGDYMNIECHACVGGTNVREDMAKLQEGVQVVVGTPGRVFDMINRRALRTDHIKIFCLDEADEMLSRGFKDQIYEVFQLLPQDIQVVLLSATMPAEVLEVTKKFMREPVRILVKRDELTLEGIKQFYIAVEKEEWKLDTLCDLYETVTITQAVIFCNTRRKVDWLTEKMHGREFTVSAMHGDMEQKQREVLMKEFRSGSSRVLITTDLLARGIDVQQVSLVINYDLPTNRENYIHRIGRGGRFGRKGVAINFVTTEDVRMLREIEQFYNTQIDEMPLNVADLI
PC9H_000646	CDS	scaffold_1	1892220	1894165	-		hypothetical protein		PF07690	IPR011701;IPR020846;IPR036259	ENOG410IMV1	U:(U) Intracellular trafficking, secretion, and vesicular transport		GO:0016021;GO:0055085		12 (i49-69o89-108i115-135o141-164i176-196o208-228i249- 275o287-305i317-335o341-364i376-397o409-429i)				MASAPLPARVPQMFDDDTEKKDAIEEKLQIETTTTPASADDFPDGGLRAWSVVLGASLSAFSTFGYVNAWGVFQSYYEQEILPTTSPSTIAWIGSIQYSLIFLPGLFFGRLFDLGYFKIPFFISSTILVLATFLVAQCTEYWHFLLCQGFAIGLASGAIFGPNIGIVGHWFLKRRGLAFGFTAAGSSIGGTVFPIAARKLIPQVGFPWTMRIIGFVLILTIGIPNVVLQRRLPPKKVSGGLFNLRAFKSIPYTLYTLSCIVAFLGLYTVLTYIDISATSFGISADTSFYLVSIANAGSLFGRLFAGVTSDNIGAVNIIAPMTLVAAVLTYAWPYAKDLPSLIVVAIIYGFASGTFVSIFAMPIYSFGAIEDVGRRVGMCMTLVALGALAGPPISGAINR…
PC9H_000647	CDS	scaffold_1	1894528	1896547	-		hypothetical protein		PF07690	IPR011701;IPR020846;IPR036259	ENOG410IMV1	U:(U) Intracellular trafficking, secretion, and vesicular transport		GO:0016021;GO:0055085		12 (i48-69o89-111i118-135o141-169i176-195o207-227i248- 265o285-303i341-361o367-386i398-415o435-455i)				MSSPEAANEGTTAQISAPFDDTKEGKPGFETNVVAAEADDFPDGGLRAWLVLSGAMCITFSTFGYVNAWGVFQAYYQETLLKDSSTSSIAWIGSIQYALIFLPGLVVGRLFDLGYLRSMLRIASAFLVAATFLIAQCTKYWHFLLCQGIVIGLASGICFSPSTAVLAHWFKRRRGVALGLLAVGSSVGGTLFPIVARLLITCVGFQWTMRIIGFILVCSLSFANLTIQRRLPPTNVSGGLFNLKAFRYAPFTIYCLSGFTIYLGLYTVLTYIDLAATAAGVSPDFSFYLVAIANASSGFGRFASGYVADSHGMCTMFHFRRRRFWSVVYKSMLTPIPEGPINAMIPTTAIAGILTYAWPFAQDKSSLIAIAVLYGFFSGTYTSLLAKPMMELGDTGDVG…
PC9H_000648	CDS	scaffold_1	1896699	1900270	+	PMT2	Protein O-mannosyltransferase 2	EOG092R02NJ	PF02366;PF02815;PF16192	IPR003342;IPR016093;IPR027005;IPR032421;IPR036300	ENOG410PGRQ	O:(O) Posttranslational modification, protein turnover, chaperones		GO:0016020;GO:0000030;GO:0006493		9 (i183-203o209-227i234-254o266-299i320-339o642-662i682- 704o710-729i741-758o)		GT39		MVLFSLLSACRKELEDEELPLHYMTEEKARRRVPKGPSAVDSYAPQEKANGHYDDDEGKDVYHKQKSLANQRVGSGRLRQPPPPPPTSMREFFFQNLEHIPPIVYTLLSCWTRFHKIGHSNIVIWDEAHFGKFGSHYLKREFYFDVHPPLGKMLVGLAGLLSGYDGSFEFKSGAEYPDTVPYVAMRVMLAMFGVLMVPLGWYTAVELGMSQWACHLVALMVLFDVGWLCISRFILLDSMLLFFTFTTVFCLSKFHNQQYHSFSFDWWLWLSMTGISIGCVTSVKMIGLFVTALVGLYTIEDLWEKFGDLKMPVRDQVRHWVARICCLIILPILVFMASFKIHFMVLNHSGPGDAQMSSLFQANLVGNDFAKNPLEIAFGSRITLKNMGWGGGLLHSHIQ…
PC9H_000649	CDS	scaffold_1	1900659	1903634	-		hypothetical protein		PF00443;PF13423	IPR001394;IPR018200;IPR028889;IPR038765	ENOG410PIVR	O:(O) Posttranslational modification, protein turnover, chaperones		GO:0036459;GO:0016579;GO:0006511			C19			MTNHHPYTGSGQPYYPHQYSYPTHSASHSPIPGNAPFQYQNPYVLPPSPAGIPPHPHMHMNGHHHHQPARVNGHGRGAYTYAHNSYNSRPVAGPSYPYPSHAPSPKYPPYPPYPTAYPPPHIPYPPQHWTAPQTPHSQISSPQPTQSSVSKDDPPPSIKSSPDAAAAPVLEHEPIEVPEVLESNETQPPPSPPPEPVEETESIESSPTESSIPATSSDIARGAYAIWSRRPRHPSQAPGIIISSHARPPPGVVKYALELPTPPASPPVASCPLPDTNEAVDEPANVPEEHAEDVKSRTVEVENLPSKETIPSLPSSSTATDATNTPSTTTPGSPVSTTNTSVSLNATPVKLDDSVASVADVPVSPENHTPTLEPERAPTPEVSTSKPTDDATPPPAKPP…
PC9H_000650	CDS	scaffold_1	1904158	1906695	+		hypothetical protein	EOG092R07GO	PF13920	IPR001841;IPR013083;IPR013087;IPR041888	ENOG410PKRG	O:(O) Posttranslational modification, protein turnover, chaperones		GO:0003676						MSTQTATQTASRGQGNRGGNRGKGRGGRGGRGGNRGNRQAANGGDQRAVQAVQTITEATAVVSLSESEVVKDDDAASVQTSPEMCWICAEPVKYYSVPPCNHRTCHVCALRLRALYKKTECTFCKDPQTSLIFTVSPDALFSSFTSEAIPFKDSLLEIYFETEDMMQETLILLRFNCPDPDCSYIGAGWGDLSIHIRGVHKKNLCNLCVKNKKVFAHEHYLYTRNELAIHLPSLLSRHHSGKQPAKAQIEGGIHPLCEFCNECFFSDDELYAHLREHHEECFVCKRNGVVHQYFRNYPELENHFNTVHHPCENSECLARKFVVFNTRLDLQAHMVEEHGAQMNTRDKKEARRVEADFEFEAIGRGGRGGRRAREPEGNRDPPPAPPGPSRPPGPSRRRE…
PC9H_000651	CDS	scaffold_1	1906770	1908226	-		hypothetical protein		PF00107;PF08240;PF13602	IPR011032;IPR013149;IPR013154;IPR020843;IPR036291	ENOG410PHMT	C:(C) Energy production and conversion		GO:0016491;GO:0055114						MTSAINTYKALVVKKSSGSVYAYDAHLTDLPLPKLNPGQVLVKVNAAAFNHRDLWIRRGQYPGITPGSTFGADGAGVVVGSHDKNDTLVGKRVFVTPMRGWEKHPDAPESHTATLRFGVIGGSAWLRLGTFTEYVAVDRDQAIPTPNHLDDTQAAAWPLAGLTAWRATIINGQVKKGDTVLITGIGGGVALVALQFCVAKGANVYVTSGKQEKLDKAIALGAKGGVNYKDKDWRKQLGVLLRKNNHGLFDAVIDSAGGDISELGKIVKAGGRFVCYGMTAEPRITFTMREVLKNYKLLGSTMGSRQDLIDATKFMAEHQIVPVVSHVLDGLESADEGFELIKRGDQFGKIVIKVRHDAQSKSKL
PC9H_000652	CDS	scaffold_1	1908476	1911383	-		hypothetical protein			IPR015943;IPR036322	ENOG410PR6A			GO:0005515						MTRSLRPRTSRPTYSLLAGLDGDDGDGPSQVLEEMDSGSDFAPAQEDPNKSSTKDIDASDSDGGASDVSVENPEIVRITKLVRPAANKGKMKQSAPRASVVAPTASSSVGGLLGTARRHMYTLPATRAQHRHRAPPLFIQARATLRLTKAPELFEEPSVTETSAFNYSPEIARKLGKAWGHSIGPGPVWDLLEDRGWFKEAQPGDITESSRRPRVYRDLKITNSWEVLDDVQAAGYLPSDITTTHDGAFKPPQPVSCYFGKYGDQKKVELTMLHSVSMSDFVPGSKSHVFNAGAPVWALDWCPIHPSDRAARSYEQYLAVAPLPSRSYSSEIGVRIPRPIPSCIQIWSFSFDETSDSSKVTCEMVLCLESGPAHELKWCPLPSHDMLSVSLSKIRKLGL…
PC9H_000653	CDS	scaffold_1	1911518	1912552	+		hypothetical protein		PF00081;PF02777	IPR001189;IPR019831;IPR019832;IPR019833;IPR036314;IPR036324	ENOG410PKNH	P:(P) Inorganic ion transport and metabolism		GO:0004784;GO:0046872;GO:0006801;GO:0055114						MFAIAKTALRPATARYSVIAAACRSKHTLPDLPYDYNALEPFISEEIMKLHHQKHHQTYVNGLNAAEESYASAQSTKEQIKLQSALKFNGGGHINHSLFWKNLAPASGDGGKLPDGPLKQAIERDFGSVEEFKKKFNTTTAAVQGSGWGWLGFNPTTKKLEVTTTPNQDPLITHAPIIGVDIWEHAFYLQYKNVKPDYLNAIWNVINFKEAEARFLEASA
PC9H_000654	CDS	scaffold_1	1912727	1914445	-	VPL2_1	Versatile peroxidase vpl2		PF00141;PF11895	IPR001621;IPR002016;IPR010255;IPR019793;IPR019794;IPR024589	ENOG410PMVS	Q:(Q) Secondary metabolites biosynthesis, transport and catabolism		GO:0004601;GO:0020037;GO:0006979;GO:0055114	SignalP(1-23)			AA2		MVNSFHSLLSTIALALLVPSVLAVPAHRAKCSKGRTASNDACCVWFDVLDDIQENLFDGGECGEEVHESLRLTFHDAIGFSPALTRQGKFGGGGADGSIMLFSDIETNFAANNGVDDIVEQQKPIAIKHQVSFGDFIQFAGAVGSSNCAGGPRIQFLAGRSNVTKPSPDHLVPEPFDSVTSILARMGDAGFKPDEVVALLASHSVAAQDTIDPKLAGHPFDSTPSDFDSQFFVETLLKGTLIPGDSLHKGQVKSPLPGEFRLQSDELLARDSRTSCEWQSFISNPNSMVPKFERAMAKMATLGQNPKKLIDCSEVIPVPRGRVKQPTLPAGKTIKDIEASCRKAPFPRLPTDKGTFTSILPVPSS
PC9H_000655	CDS	scaffold_1	1916790	1917255	+		hypothetical protein													MPDYYRKTRLEHYDPYRRASLYIEPLNIDDSEIESLEFCSSFMLDADIFDDDFEIASVVEEYKPLATTAKWSAKFTVAWEALLVFTSKCAKLLQPN
PC9H_000656	CDS	scaffold_1	1917875	1918285	-		hypothetical protein			IPR013870	ENOG410PTSQ	J:(J) Translation, ribosomal structure and biogenesis								MFLHYALRRPVLIRCTRRAYASAPPSQKQEPTTGTTKASEAPAKSSCIPNTVIDGVNYLKGQEPVIAKPDDEYPAWLWTILAPKVYPDDGPGGKAERVQRRRENKQRIKDQNFMKTQ
PC9H_000657	CDS	scaffold_1	1924569	1925571	-		hypothetical protein													MILIKGSVSSTELPPSSGLPSSLRKQQMGIDSDHYHFSNMYHHHTKHSPSSRAADISRLLDPAYSPSNTTPTKAAYVDHHGDLHDPDFRHFPSASSSSRNSPTKRRAASTHSASHAFARPQWELGTLYDDVDEFALDEDEDDDASNSNNHYDSYASPFSQRASRYVRDPYSRTSPIYTYSSYHYPTSTYSYASSPVSSSPISYSSDETALNDSPSDGSPLSDEPLPLHRRCVSRLRASRPRHRSQSRDEKRVSESIEEAPTRRSIESARSEARTLAPGNNDAEEEEEEQQQEFTPTCAQALKRQWSCIALRWRLGVFRAKKKVRRRLSAVVHQ
PC9H_000658	CDS	scaffold_1	1931624	1933138	-		hypothetical protein			IPR032675;IPR036047	ENOG410Q4H0			GO:0005515						MAFLSQPRALQIPELLLRIFQFSEPEDNCTNARVCKNWSNEALAVLWRSVMFDVVLELLGPTTRRAIGDLIFVRCPEPADWSRFNHYAWRIHHLEVSWDSYHPSIFQHIASIRSRTELFPNLETLDFDDDLGNVHLFTHAKLKSLVLQSSVNAGDCPHTKTALLHLPLQTRHLETLNLGYLLIPKEVSHSDLASVLQGLPALKTLWLPGDWLVSQIADALAWHPVLECLVSTIIHRAHATTWDVFSTSLDPHSFPSLKQLDIAVPFARAALLLSQTHRPRHLVSFTLKCYWGEESVHSYARFIDVICSNYPELESLSVQGNDAEQYPAALQRMTFLELRPITRLSGLTQLELTHPLQLDLDLRHITEIAKALPSIEVLYLNDSPRISSVPNLTMSALVT…
PC9H_000659	CDS	scaffold_1	1933710	1936655	+		hypothetical protein		PF04515	IPR007603	ENOG410PGEU	I:(I) Lipid transport and metabolism				10 (i206-229o249-270i277-303o315-336i361-389o409-428i476- 496o502-526i602-623o635-656i)				MFFSFTTDNGSRGGHSPDDSDLDDSDDPHLRLSNASRLEQGRYSARRLPMDDDDDDPYLRLDEDDGPQRFNPRNTHSSRYNAQNVPLISSEIDDSRREGSETRGWLAHQASPLRRARSPSPSPSGSSSSSSSPPPDIFSTPNNRPKLSSPRSHQPPLPPPTSRNPISLSLTESLLPRDGVSRPVHVFSLPDPRHTPRSRRKYHDSIWTALWLTGVTICLVASLITLIFTRKPPKRAHLILPYTTLLHTVPLLTILTVLSACAAYLHIWLLKVFVKPVMIATSMFVPATLFISAICAFVGSFMWDGDTEPTWGETVGLRLFALVPLLLSLFTARRLLHLPQILHMASSTLDLSTKLLTENPFLLALSPAILLCASIISIPFLTLVFRLLLIGYTTGDQVH…
PC9H_000660	CDS	scaffold_1	1938562	1941532	-		hypothetical protein		PF13920	IPR001841;IPR013083	ENOG410PSST					7 (o12-30i89-110o166-188i280-298o310-328i340-358o388-411i)				MITNISPSSYNLTLSLNISSILTFPSRLLARMRKMDGVLALPHNADDVITSSTFTSLQEAMSATPLPSVNKQQMLVRQRPDFQPFPGPWGFFTSGYAAGLLVMAILLHRIQNVVVPPRSSELHQLHRGRHNDHQHGDSNISYGHYMLRRIYSRVLPLDLSRTSTRLAAHLPSLYVLLRMLLLWTLVLLQTADVLNLPHNGEIKQPPAGTTGWQAIFDFNSWLWVQNLVVWSSAMEMETICWRTFCSVCAAFCVEALVKGLDGAGVGLTAHMNANTSPFNLVGYAFLLHIYSSPITHVNKYDGLPSRPDKHVVVTIAIPLLQLTIFHILSINKRWAHHRLLPTALSSCLSLTHFHLTLWSHPSPFSPPDKTSTPPSITSYPLLNYIPNIFESLLLATSLL…
PC9H_000661	CDS	scaffold_1	1946449	1947717	-		hypothetical protein		PF00134;PF08613	IPR006671;IPR036915	ENOG410Q3EE	S:(S) Function unknown								MDFSPCSSTSSFSSTTSSTLSSSSSNHAASLVHPSLHSPAIMDLIDVKISRSLIDYMVDCVAETVDYAMGRPSPSSSHRGRKSRRSEYTKFTTFVTNVITRAEVATPVYLAALVYIDRARPHLHIALEEWALERVFLGSLIVASKYLNDSTLKNVHWALCTGVFGKRDVGRIEREFLDVLDFELAITEDDILAHYDDIAAIAITPYSIRSMQVDYYTYQEPTQVAVEPTKPVATEYIVQPTKRHTRNNLSVHIPLPGAVPELSYSSPESASSDDSSFSSSPATPSTLNSDSDASPATSPERETCSKDDSFAIPVDEIHPHAEYIELSSRSATIPVRPPTAAKKSGLGFTSTTMELLRAFPIPLPPVAHHQRDKGIHSRFPIRLTH
PC9H_000662	CDS	scaffold_1	1950664	1952097	-		hypothetical protein		PF10146	IPR018482	ENOG410Q3AF									MSQPRYVHYNPPNAHASPPVNTTTIAPQDTTKQPPPHVQQPQQTQQHQQPQSNNGANVGTSVPLIATGDWTKDLVHLAKTAELKKHALTLQLHTAHILSAHATLEQKNKAIQDVREQKNKLESERNKLINSLREINEDRDKADLMEVSLSKECTDLRQKISDLTDGEYTIAKQDVDRLRQELGQPPLPSLQSTLDDKSSQYLNDRRLNGNESISSANNSKRGPGDLLQMDAPPAKRPRGRPKGSRNKGKDPTATIAA
PC9H_000663	CDS	scaffold_1	1953640	1954400	+	NAT3	N-terminal acetyltransferase	EOG092R0KR3	PF00583;PF08445;PF13508;PF13673	IPR000182;IPR016181	ENOG410PGG0	S:(S) Function unknown								MSVLRPFRATDMFKFNNVNLDVWTETYGISFYLSYLSRWPDLCCVQQAPSGRMMGYILGKAEGSGAEWHGHVTALTVAPEYRRLSLARKMMDLLEFVSDEIYRGFFVDLYVRCANYVAIDMYEKLGYSVYRRVREYYGSLGVGKGGRDEEDAFGPDMRKPLSRDPGRRSVRPNGRDIIVSAHDVP
PC9H_000664	CDS	scaffold_1	1954453	1959422	-	IML1	vacuolar membrane-associated protein iml1		PF00610;PF12257	IPR000591;IPR027244;IPR036388;IPR036390	ENOG410PI1E	T:(T) Signal transduction mechanisms		GO:0005096;GO:0035556						MPGSRAESQKSQFSGRRRSNTAQSILRSAAPVITMLQVGDYKILNAWVHDNVKESNAILFNQSLWPGVLEGDMLRITASSEDSDPGAGILFIVPRDEGSSKPQLQISIPKPVADAFNWRNNMEVMVTKVERENHQADYVELIFQDQYLGRNDMWRLGEHLVGQCIYKNQEISFIGAIAAKIHSIYVNGKQVSAACMTATTKTIYRSLSAKVMIFIQVCRELWEFSGDGERYNEKIVHSFLPALFAKWREAGTNHIVTIVLISRVYYEQSEIDYAAGPLRLDDQGNWYKDFYKVITDLEVIYDWKPTLVSLKNSFWDFQRDILLTHHHHRAAADPQAGAADQVRLVGRLSFAHDGPILEALNLALNPTETHYIDRSLSLTGATTILITPGTGYFRVSKAL…
PC9H_000665	CDS	scaffold_1	1959782	1961299	+		hypothetical protein		PF03054	IPR004506;IPR014729;IPR023382	ENOG410PHG8	J:(J) Translation, ribosomal structure and biogenesis		GO:0016740;GO:0016783;GO:0008033						MSGGVDSSVAAKLLAEQDYNLSAIFMRNWDTRDESGTDKGCEWEKDWQDVQQVCRTLDIPCRMIDLSREYWNRVFEPSLRLWESGVTPNPDVWCNKEIKFGALLDRLPHSESIPEEAWFATGHYARKSTGPRAKLLRAVDRHKDQTYYLSSLSEASLDRALFPIGGFTKPEVREIARKHNLVTAERPESMGLCFVGEKGKFRDFLDQYIPPKPGPIVDLLTDKTLGEHHGLWTYTIGENARISGMPMKMFVSRKDIANNRVYVVPGTDHIDLWATSIRATGWSWIWADSPPIGISQPAGTRLRAKFRHKMGDIPCTVRRRADGDVIITFDDPRKAVSPGQVVALWDADWCLGCGTIVEGKNDPPQSLDYTQDYQKANIAYTQESPNP
PC9H_000666	CDS	scaffold_1	1961338	1963060	-		hypothetical protein		PF12937	IPR001810;IPR032675	ENOG410Q43C			GO:0005515						MASSSLFSRQHLQLPLPVDDEGIFGPSEVYASSSDSSRSPTPHGVLRSLPASIPEDCDDQGYLDPDYVIFHAPAADPIDFGIAITEQDKEYSYEWTGEQHSLSPGSFDKRPFSFLEKELGPSPTWSVDSEPESVNPHRSILKLPDEVLRQVFLSYGAGTDSKPSVRCGPLFLGQICRRWRTIVHSTPELWSSLTILAGDHVCVPRMPLLKAWLNRSKNCPLNLTIVYDGRMLERPGNFGSIDLVSELILTHSSRWHTMCFNYTRAKRLISMLSRIPPWGLPILHNVEISLRQRVAPLEQAPILSSLLSWAPSLRQLTCRGLAGISQITIPTQLTHLDIEGPLSTKDCLALLRSGRQLQDCRFHMEHSQEESLDDSPLLVHPLRSLYISSQEHLGDFFDH…
PC9H_000667	CDS	scaffold_1	1963695	1965003	-		hypothetical protein									7 (o24-44i56-73o93-116i128-148o181-199i219-242o248-273i)				MASISVLPDLMSVYLQALDKTLKVIILSSIWLGVSIPLLFALFFFSTSRLRCQPMFIFNVVSICVGIAMGLLNMQTLVPPLVDPLRLVDRRGILAYTFISTSVPIMVESILMFRLFAVFPYRQTPKRLFFSIFIPLGLLKAARVGNVIEFMVTFARITRSATTNQEMGALSLRHAGPKVEWFLQVVDNTTASVLFLWRLNLNKSLSPPSATQPSQLRTLFWIAITNFIFPVLVSITLLVLYFREGDYLKILMCIISNAYIEIIGVLMATVWAASTHWQAENPSWSPFPVPQFQKVECTIYTSKIHWDPSTSLAVTRDIPVYLLEYFDIR
PC9H_000668	CDS	scaffold_1	1965652	1967215	+	RRP3	ribosomal RNA processing protein	EOG092R0BSN	PF00270;PF00271;PF04851	IPR000629;IPR001650;IPR011545;IPR014001;IPR014014;IPR027417	ENOG410PF8V	A:(A) RNA processing and modification		GO:0005524;GO:0003676						MSSPSPEAEEPQETQTFRSLGLIDPLLEALERLSFTSPTEIQSAVLPHALEGRDIIGVASTGSGKTAAFALPILQKLWENPAGLFACILAPTRELAYQISQQFEALGSAMGVRCAVIIGGMDEMAQKIVLAQKPHIIVATPGRLLDHLEKTKGFSLRTIKFLVFDEADRLLDMDFGPVIDKILKIIPRERSTYLFSATMTTKVSKLQRTSLSNPVKVQVAGKYQTVSTLLQYYLFVPLKDKDVNLVNLVNSLVQNSMMIFTRTVNDAARLSIILRTLGFSAIPLHGQLSQSQRLGSLGKFKSGGRNILVATDVASRGLDIPSVDIVINFDIPTHSKDYIHRVGRTARAGRSGKAITLVTQYDVELIQRIESVIGKKMDLWPTDKEEIALLKERVNEASR…
PC9H_000669	CDS	scaffold_1	1967529	1969522	+		hypothetical protein		PF11699	IPR011051;IPR014710;IPR025974;IPR028386	ENOG410PIM4	S:(S) Function unknown		GO:0000776;GO:0019237;GO:0051382						MPSSARKSSIGTSRRASQKGHIPYRGDNPEVGKKTGIPVRHVERKSDGFEPFEEVMRQADGRTPPRPKSKKQKAQKLVALDEEEDGEMSMELDDNTSTPLNYFRNARQQPLSAHRVGSSSRPVGRPSLVDYDQLPSPRRFSLASTSAGPSRLSRSFAANDNFDDDEDDGGGGFEHNPPFEPHDQGASGSDDELAQQSHSRNSRRVSFSAMNEDMEEDEDDQPIHPPSNHASPSRRKSKGKGKATEEDLEEDRMEDFAQELDDLGSMENGVVSDNEQEEEQQRSPAEKAKIKRGKQPAKRTKRAAEEPRSRSSSPTGVRRSKRFRFRPLEWWRQERVVYGRRDSTSGPVLVPHIKEVITIPQETPVPLGAKNKRRGARGRSKSKANSPPPPASNPEEGWD…
PC9H_000670	CDS	scaffold_1	1970171	1973062	-		hypothetical protein				ENOG410Q3RY									MLHMHGVHRATSSRVQPPAVNLKERIAALQQRNTAQNPHSTSPPAVPVSSQNSKHEAPKGLRDRIAKFEQKGGVPIPRGSFGLGAPPVPENGQQKRRGELYGNRIPAPVRSGILTPQVTGGTVASWSRSVSSPGVLTPQVTGGTLSSWRSMTSSPDSRAVSPTDWDDMPEDEDATTTLKPPTFSDLGRSPSQPFPMDDEEVDSNNEFEPPSTAKVNMPTKVDISSDGQDGISVSSTSAPDSFTSPTQSLGIGETQAGETRAPSTPDVHVQVLDASAIPSSIDMNADQLLPNIPEPKEDVDLLCNEPNEELTANTFQPSALGLIDTLSTDVIHTEEHVDRELDLDEHSLPESAGSVETPPLHAQEPSRPLEVDARSDFTPPEEGSLDTIHSLPISGSEQA…
PC9H_000671	CDS	scaffold_1	1973665	1976385	-		hypothetical protein			IPR001547;IPR017853	ENOG410PJVJ	G:(G) Carbohydrate transport and metabolism		GO:0004553;GO:0005975		1 (i83-107o)		GH5_9;GH5;GH5_50;GH5_14;GH5_15;GH5_45;GH5_49		MSSPEMASTSLRSPFGDSDTPNLTPRASYLASSDRAPSSSQLISPGERVESNSYDVAGAATASSPLASPDNTFTREQKSRRPIIWILLVLGIIALILVIVLPVYFVVVQPRNRNSSAASAPSTEGPGETDNNNTPNVSPEAPVLATTGGDGSEVTDEDGNKFTYRNSFGGYWVYDTKDPYNNGARPNAWTPPLNQSWNWGTDRIFGVNLGGLFVLEPFISPALFQRYPGTIDEWSLSMAMAADTANGGLGQLEEHYKTFITEQDIAEIAGAGLNWIRLPVPFWAIDSGHAPTAQEPFMAKTSWKYIVRVLGWARKYGLRVCLDLHAIPGSQNGYNHSGKWGQVNFLYGNMGMANAQRTLSYIRTFTEFINRPEWRDVVPIFGIMNEALTRLIGVDIARS…
PC9H_000672	CDS	scaffold_1	1976886	1978159	-		hypothetical protein									7 (o20-42i54-76o91-113i125-143o179-197i224-247o259-278i)				MTSPLPAFMTAYLHALNKSLKVIILCSVWLGVSIPLLFALFFFSTSRLLRQPIFIFNVVSICIGITMGLLNIQILVPSLVEPLVPVDRHSVLAYTFFSASAPILVESILMFRLFAVFPYRQTPKIIFFSIFIPLGLLKAGRLGNLIEFMVTFSGLIRNATTTEEMGELSLRHTGPKVEWFLQVVDNSFASVLFLWRLNLNNSLFPTGTAASAQPRSYSSRIRTLFWIAVSNFIFPVIVSITLLALYFREGDYLKCLMFLISNAYIEIIGVLMATVWSASTHWQGSESHPPNSFPVARFDGNGASGIPTSKTHWEASNARPSTSFPVVRFDGDGLSIPTAKAIQPSPREDIYGTLDSSDPFGIYRPSTKESA
PC9H_000673	CDS	scaffold_1	1981009	1982455	-		hypothetical protein		PF09532;PF12701	IPR010920;IPR019050;IPR025609;IPR025761;IPR025762;IPR025768	ENOG410PSRJ	U:(U) Intracellular trafficking, secretion, and vesicular transport								MAQSFIGKPIALISHSDVRYRGILAGIDAQASTIQLSNVYSMGTENRRLGPDFIPPVQEPYDYIIFRASEVKDLSVDEPVQRRSVHDDPAVIGASTASAPQQPYGFNSVPPQAAPAPAQPLVAQSQPPAAFANGRAPQTAQTPPEQPASTANPSANATSRHPQQQQQRRNNANPIHTATASLETVERALGDLRVSNNGNAQTGRSGRRGGGREHTKEIKVPKTDFDFQSNNAKFDKAAIAKVEGEPSSEGEGKSDAEAKSPKSEPAYNPQSSFFDSLSSSTQGPMSAPRGGGGGRRGGAAGRNRREEERERNYATFGEPGGIGLMGPGQYVGGWGGYGRRSGPGAGRGRRGGVPTGTR
PC9H_000674	CDS	scaffold_1	1982832	1983607	-		hypothetical protein		PF08695	IPR014807	ENOG410PS3M	S:(S) Function unknown				1 (i59-80o)				MSFLARRAHAHTPLRVPRRAYATETHRPRPEPSVETFSSPARLRPYRQPRDLPLPKKKWPVILAAVTGGVLAWSAFLTYITNQEKISSSVVRQIMRSVKESVELRDHLGEAIRPQPEWWLNGDPRIKGNINQLQGNVDVSLRLKGSKDSGTLYFTSIRKEKGVPFTILRFKVICDDGSVVHISSDPI
PC9H_000675	CDS	scaffold_1	1983683	1986382	+	COG6	Golgi transport complex subunit 6		PF06419	IPR010490	ENOG410PIBC	U:(U) Intracellular trafficking, secretion, and vesicular transport		GO:0017119;GO:0006891						MSTPSPSVRPTVRPSASHTSQRNPISARLYKLLGTSFDDNATKEALQTLSELYATQSTITPSKGKEIVHDTLDDNDTHDLELDGFRTSRANTSHTLVESIPGETAATARRHLKRDMENRLAEGSHEFLNALGEVSQRLQALQLHIDILHASCDEAEAQLDVTKESSKALLEHAGNVANEKEQVENKISIVNLFLAKFTLSEEEVKSLTSKDVHIGKAFFDAMDKTERIRDDCMILMSGEEGPTKVGLDIISNTSTHLEAAYEKIVSWCSYEFQQMGREPQLEVGTTMRESVRRLRKRPELLNEALGQLSETRQTALLSSFIAALTRGGPSGLPRPIELHAHDPIRYVGDMLAWVHQGIAAEREFLESLFDLRGHRRMVGSVRDFSSMSEEEEWIRELMD…
PC9H_000676	CDS	scaffold_1	1986613	1987074	-		hypothetical protein		PF04911	IPR006995	ENOG410PTBI	H:(H) Coenzyme transport and metabolism		GO:0045263;GO:0015078;GO:0015986		1 (o51-70i)				MGKTFTRPGRCELVRTFLQNQHFEIHSEATVCIVIFSKMAFLGLRKWPTPFLKPMWPFMAAGTITFYLVAKLQDAAVRSPEFAKDPRNPYAAQIAKEAHH
PC9H_000677	CDS	scaffold_1	1987195	1990865	+		hypothetical protein	EOG092R02B6	PF00637;PF12451;PF17122	IPR000547;IPR001841;IPR011990;IPR016528;IPR024763;IPR036322	ENOG410PI91	U:(U) Intracellular trafficking, secretion, and vesicular transport		GO:0005515;GO:0006886;GO:0016192						MASVQAQAANAASAPAWRQFSFFDVVPVKDVHDLASPPEIFKNPFEISTTATSSIGVLVADLHGSIHILDKHFEITRSWVAHVGGRVTHMSERKGVLISMGEEDSVKSPLLKIWDLGSNDKKTGAPLLLRSVKIQPSNRPHPVTTIALSASLSHLAIGLADGTVLLYRHLDQSVSSSSNLTAVPKPRTVFESSTEPITGLGFKEPTEETNSLYLFIVTTNRVLSYQASGRGSGGAPVVIDEVGSALGCATVDWRASDIVVARDEAIYICGTEGRGACLAYEGHKSFVLTHLNYLVMISPPMVPSASAASATVRHVARAANSVDSEITKVTVFDLENKFVAFSGTFTQGVSRVFSGYNKIYVLLTDGQLSTLEEKPTSTKLNMLYSKSLFVLALSLAKTQ…
PC9H_000678	CDS	scaffold_1	1990962	1991432	-	COX16	Cytochrome oxidase assembly		PF14138	IPR020164	ENOG410PPWG	U:(U) Intracellular trafficking, secretion, and vesicular transport		GO:0031966		1 (i21-40o)				MAVFPSNPVNKTPMSQLLRKYPGLFGVPFVLLMVGASFMLTPFTQTRYDLQDQRVKQMNKADELRLDQKRKKFDIREEYFRLSAASDDEWESKRIKRPKGLPEWGVPPPESPNSPKDSGK
PC9H_000679	CDS	scaffold_1	1991620	1993178	+	PDA1	alpha subunit of pyruvate dehydrogenase	EOG092R0CSH	PF00676	IPR001017;IPR017597;IPR029061	ENOG410PFYV	C:(C) Energy production and conversion		GO:0043231;GO:0004739;GO:0016624;GO:0006086						MASLARIRLPRRLPFAVRAIQTSADTTELHHAPSDPSHPMTVKLHEDSFRAYQCDVPELEVQVTKDDLLTMYKQMQTMRRMEMAADALYKAKMIRGFCHLAIGQEAVSVGLEHGITPTDKVITAYRCHPFAVLRGGTIKGVIAELLGRQGGMSHGKGGSMHIFTPTFFGGNGIVGAQVPVGAGIAFAEKYLERPNATFAMYGDGASNQGQVFEAFNMAKLWNLPCVFVCENNKYGMGTSAERSSSNTEYFTRGDKIPGIQANGMDIIAVLQAVKYARKWTVEDKKGPLLLEFVTYRYGGHSMSDPGTTYRTREEVQRMRSTQDPIRGLQRYIEEWGLASEQDLKQLDKAAKAEVDQAVEEAKTSPEPQAKDLWTDIYYKGTEPPYMRGREREEVHQY
PC9H_000680	CDS	scaffold_1	1993628	1994633	+		hypothetical protein		PF00583	IPR000182;IPR016181	ENOG410Q3P9	S:(S) Function unknown								MAFNIREISNLSGTLLIFVFHALKVELSLRRYPEAKLTELSVLAAAAFEGDGFLLAAVGSDPTLNVSYHRAQMIAATMAGKIVVAEDAQDGSVVGVALWFPPGITIEDQDRIAFQPFITKCPPSIQTWWNDHFLVEHPKSCQRMFGRNWFNNAWQLELLAIAPGHQGKGIGSALKEQNVRFYQRLGFVLRGKYEFNSNSGGFPLFCMTAARYTL
PC9H_000681	CDS	scaffold_1	1994750	1998661	-		hypothetical protein			IPR032466	ENOG410PHKY	G:(G) Carbohydrate transport and metabolism				1 (i21-43o)				MYNLYQPFTHGPSLYRRRNPNAVRAIVLALSWTFLLLFVWVIFAPESPWSSALRRKTNSNLKELHHARKNTNIARCKSLNNLPPTADAPVPGIKPPPRSRSDRYEPSKDEQLNKRKKYIKLKNGKVWTGRLNGTEVIQGDVVFGEGVIKSITAYTKPTPVHSGYTTHVEGDDIKGGGEWVVVRLEDVREDQEDGESVETEVIDVKGAWITPGLVDLHSHIGVSSLPQLSGASDGNSHNGPILPFLRSIDGLNTHDESYVLVMAGGVTTAQVLPGSANNIGGQSFVIKLRPTNERSVISKVVEPPYTLLNGSRYGDGDWDFQARPRWRHMKHACGENPDRRYGFTRMDAAWAYRNAYNEAKKIKDQQDEFCSQLLNGDLRRAEEEFPESPLETEALVDVL…
PC9H_000682	CDS	scaffold_1	2004873	2008130	-	HSF1_1	stress-responsive transcription factor hsf1		PF00447	IPR000232;IPR027725;IPR036388;IPR036390	ENOG410PG48	K:(K) Transcription		GO:0005634;GO:0003700;GO:0043565;GO:0006355						MYHQYYYQPYYPASPPSHHIEHASDYYAMPAEHSLSLARQPSQVHLSKATRQVVPAFLQKLFEMVNDPSNADLIRWSDAGDSFFVLDHERFARQVLGRWFKHQNFSSFVRQLNMYGFHKIPHLQQGVLRSDQEAEFWNFEHPNFHRGQPDLLCLIQRKKQAPQSSDLPSDPDPAASASANPSSSSHTQSPADPSASSAPATAALGNGQVLDIHSIINGIAAIKRHQTTISAELNQLKRSNQLLWQESLAARQRHQKHQDTINRILKFLAGVFGNGGGHAKDGVVAGGAEGAMGMGLNGSMGMGMSGAMGMAGAGGDAGRNEGYQRKQVQRLMIEEGPNSGKRKMPVVQVEEEDDDDEDASYLRDMSPVSLRSYNEPMSPTISEAPYINLNTPSLTPPRD…
PC9H_000683	CDS	scaffold_1	2008210	2008941	-		hypothetical protein		PF01121	IPR001977;IPR027417	ENOG410PI3Q	H:(H) Coenzyme transport and metabolism		GO:0004140;GO:0005524;GO:0015937						MGSMWGAVVGLTGGIATGKSTVSKLVGEAGIPIIDADVLARKVVEPGTRTLKRIVAEFGADILLADGQLDRKKLGAIVFGDEGKRRALNGIVHPAVRWEMFVGVVKCWIRGHRVCVLDVPLLIEGGLWKWVGKVAVVYCPREVQLQRLMRRDSSTEAEALARLNSQLSIEEKVGYADYVVDNSGEMGALEGQVSRFVSEIEGGGWVWVPPICSWLRRSHPRSATRG
PC9H_000684	CDS	scaffold_1	2015481	2016551	-		hypothetical protein													MYIYYRIYDANGPIVLKYPLSLSNLSFPDNKYVGRIDSSKVVPPFNVKNLNLAIALREGYQSIFEAGGAELYTTSSQTALPNKQGLPEDAGLHLTNPVKLKFLMKFEKPQVQRRIRPLSGAALRPISSQIATGPKQGLPEGAGSQLTHTPKPKLPIKLKKAQVEPRVGSRFAGKWSYTDTGTSTHFIHKNTSSFTLRMTSEGTIVASSYERFTTTYTGFVYQSPFNKPRPLPPPDEFTYKLSDFKVLDNSFISFLRTDQAAGCSWRMSGSLSADGNSFTLIANPIGKARRLPSRVFQRPKI
PC9H_000685	CDS	scaffold_1	2019025	2022714	-		hypothetical protein				ENOG410PQ2Z									MSQVKLTLQAPPNVDFVQGYPGIPPGPGRRQATVEGALEVRTPQGVKAKWITIELRKVETLPGGGVANTYYDPVPGPIKLWEASQDSDYELLRSRDFAFTIRIPESIPPTLNLDDRGSGIKYELVGSICVKGSKGFLRRRKEVISSTTTPIMMSKHELHSTWPVYCQPEVRQVSAEGMMMTVSRDRTCFGPNCAITAMVVLKSERLGSIILRGFEMQLVETMALTTAHTATKRALTQTHETVRAECKLPVNVSLYGGEQRQVELRCIVPPHHASSTVNSARHIDITYNLNIKAFISTGQQIALKLPVVVSTWPQEYSAEAVKLIGPAPGLSLIPVSNIPLDPHPNVLQAPNTYSGRPTPNQQTEMSIGRPGLAATFGPTSTQASSNFSSALRPIDEFGR…
PC9H_000686	CDS	scaffold_1	2022940	2026856	-		hypothetical protein	EOG092R0A87	PF00709;PF04037;PF04046	IPR001114;IPR006568;IPR007180;IPR018220;IPR027417;IPR033128;IPR042109;IPR042110;IPR042111	ENOG410PGW8	A:(A) RNA processing and modification		GO:0005634;GO:0004019;GO:0005525;GO:0006164						MATVVLGSQWGDEGKGKLVDILSAEFDICARCAGGNNAGHTIVVPINGEKKSFAFHLLPSGLVNPGCTGIVGSGVVIHIPSFFKELDDLQAQGLDCSNRLFVSDRATLVFDFHQIVDGLKEVELGGSSIGTTKKGIGPAYSGKASRSGLRVHHLFDHETFATKFRKLVEGRFKRYGHFEYDTEGEILRYKALAERLKPFVVDSLVYIHKAIGSGKQVLVEGANALMLDIDFGTYPFVTSSSTGIGGVCTGLGLPPKLIKKTIGVMKAYTTRVGGGPFPTEQLNEIGVHLQEVGREYGTTTGRRRRCGWLDLVVMKHSYMINGYDALNLTKLDVLDDLGEIKIGVKYLVDGEELPGFPADLDTLAKVEVTYETLPGWKADISSARTYEELPENCRAYIEF…
PC9H_000687	CDS	scaffold_1	2027089	2029901	-		hypothetical protein			IPR000225;IPR011989;IPR016024;IPR038739	ENOG410PG4B	S:(S) Function unknown		GO:0005515						MTIESVNLTSLKQVKNTVIGNPSAKITLARDEHFVQTLVQCLNQPAPPSDRASGSQDDIRIEAAHVLSSLSYGSEEALDSLLNARAVEACLHAISCLQPHDSNGLKSAFSRSLRSLATAVAEVVGPSQWGLRPEGSSVRDAARDALECFFHPNYLDVYLPMLVDSSPQTSISIAQLLAAAVRTGEHRDAITEWLPPVDRIKESKGKRGWEKPAVINSNAPGRQGGWVARNLAALLRSRDSKLQEAALYALSALSKDNDKIAALLVKPVSDRDMPSTLSSVLSLAKSRSTDVQLAACLCATHIIRASPTNHSSASDELYIQNIVSVLNRIISSSTSEALQTRSRACFILYNLISDDYRLCQFAHERGSLDQLATVVKDITPSEVQPEWDEDEPESLSSLR…
PC9H_000688	CDS	scaffold_1	2030449	2033242	+		hypothetical protein		PF10300	IPR011990;IPR019412	ENOG410QE90	S:(S) Function unknown		GO:0005515						MATELPSSQNPNDAALKAAMKGFDHLFSNDIVGARKEFAADHTPFHWMGLGACAFLQAALGMEASLMAEATHCLTKAEAESKTLLRSAGSSSSSRFPQGTEWEILNADAVVLLGLTHALSESYMGYLQCLYSLNSAHGKFTKLYKTVFPTGLDHYSTPATTPAISRNASNPNLAVPTQRSSFFGRWARPVGSLLSVPSSPSAAGASLPLDGPVEELIVSGTAFGYGLFNLVFSLLPKKIQSVVGFFGFKHDRKLALQALAVAAAKSDVHSVFAGLVLMTYYGVVLLMSGYQADEAHIVKQYRAIVGKIESKYPTGALWILNRAKILRMTHDPQAAIHVLQEGLGPDREFSFVQADTLLVFELAWTLLSQRRYQEAADMFIKLTELNSWSQATYYFIAAG…
PC9H_000689	CDS	scaffold_1	2033446	2035755	-		hypothetical protein		PF00069;PF00072;PF07714	IPR000719;IPR001245;IPR001789;IPR008266;IPR011006;IPR011009	ENOG410Q4CD	T:(T) Signal transduction mechanisms		GO:0004672;GO:0005524;GO:0000160;GO:0006468						MADSSIPCDLTGHVSRQDQYPAAHGGFSDVWIGSWDKGGETLKVAIKVLRPQTCQEDARSKVDKRLRRELRVWKELQHPNIVPLFGVVSDYGPYVSMVSPWMENGNLNKFLTEELTLATRFKLLCDIATGLHYLHSLDIIHGDLTGANILISKNGVACLSDFGLSTIIAEFQGTSYYTSSIHGNIRWTAPELYRIDAVPSVTFFSDVYSFGSVMHQVLSGCIPYHNFKSDVQVLLCLINRIRPERPIHNVSDAHWCFIQRCWIDNPRARPSITEVLAAISFFHRNLLDVRPKLSSADSAGSTATSDSLIGNLSLQLNPTSPLIIPKSRTCSKHGLVQPVWAISPRVLLVDDDAVIQKLSSRLLRIFGCTIDVATDGVAAVHKMNTAIYDLVFMDIMMPR…
PC9H_000690	CDS	scaffold_1	2036015	2037778	+		hypothetical protein			IPR038910	ENOG410PT0M									MTTLQPSAHNPFRSNQQTPANTGSQVPSSPPPPPFTDSPSTAPSASAVSGTAPQSNGHASDPPAESSQSNARQQNPDADDFGLDTELPPAYTPAADTYHGEATIEYGPIRPFQRPPPAPRIQPHLVPQPTGQSVASSTSWAQTPSVTSTPSRRARGPISLLSDLAGELERQLTTPPLQPSHTGRSWNAYPGQQQSFQRPSYAPVTPNHTGYRPPPPPRHPSEQLHARSVSSPATSPTLHPPPPPEAATSDFARDFYAAGSDVSVVTEPTGNVNINASHSTPNLQSPPGAYPPPPGPPPGRSGLYPPPSGPPPGSPSQYAPPSGPPPPLPQRPRTTSPTPGSSSGSGSRPNDGRPTQVPTPGHPLMRDGKVLVYPNGYVCDKCNNTGFKHSDPLNPCKKC…
PC9H_000691	CDS	scaffold_1	2038882	2042520	+	SKN7	kinase-regulated stress-responsive transcription factor skn7		PF00072;PF00447	IPR000232;IPR001789;IPR011006;IPR027725;IPR036388;IPR036390	ENOG410PIDV	K:(K) Transcription;T:(T) Signal transduction mechanisms		GO:0005634;GO:0003700;GO:0043565;GO:0006355;GO:0000160						MDQAGQYTNRHTNLFHSSHLPPPSALQLPPPSSYTLPPLSNLSPPAARFPPQPPPPRTSHLPTYSSSGTVLPPLPSPAGSLNSWPNLNRQEQRLDSAVKRESSQAQQHTMPPPDHKDPESGAGAGEDGMPTTSDFVKKLYKMLEDQSFQHVVSWGPQGDCFVVKDMNEFTKSILPRMFKHSNFASFVRQLNKYDFHKVKNTDDNQFGEHSWMFRHPDFHANRRDALENIKRKVPTQRKQTNPSTNRPLSSTSPGPYPGASSATQHQVESLQGQVERLTQSQDEMASRIRNLERNYQDVLVEMVTFQRNMAQQDSLMQNLIQYFLQIENGKSKNAARIGASNDPTGTVSDQNPFLPTQEAQRMMGAYPESDVARATLVQMSQISKRAEVAGLSFGADGGL…
PC9H_000692	CDS	scaffold_1	2043881	2045275	-		hypothetical protein	EOG092R0LW2	PF00096	IPR013087;IPR036236	ENOG410PKIC	S:(S) Function unknown		GO:0003676						MAKKKNKQIIRPWCWYCEREFEDEKVLMQHQKAKHFKCGMCPRRLNTAGGLAVHIQQVHKLEPENLPRIDNALPGRDGYEVEIFGMEGIPAPDVADYKRRKEIELGLAAGSISQPPVKRQKVESRPLSEEELRAQLEAHKALMGSATDGKPSASAADPGAVYGAPPQAYSAAPVPAPIIPGHPPMPGMPGMPPPFFHPPGMPGGPPFPPMPGMGMPPGMPPGPPPGFPMPPGFPGMPPPGMLPPGAPPFLPPGPGMRPPFPPPHGVGPPPTFVPAASSQQASPPPPSATPSSSGATPNPQQMSNNVQSAPPPNGPTLPNPALEQTIPPFKKATSLKYSDANFSPEERRAYHPKYFTPKTNQPLEESKGKKRARAEDFL
PC9H_000693	CDS	scaffold_1	2045503	2048105	-		hypothetical protein		PF00005	IPR003439;IPR027417	ENOG410Q34I	Q:(Q) Secondary metabolites biosynthesis, transport and catabolism		GO:0005524;GO:0016887		5 (i80-102o122-140i214-235o241-260i329-352o)				MLVKRVSRTPDHHTPQSPQISTERHGLRRLRWGIFEIAFEPPSRRYAFLGCVSSWPRIPPSVPYAARLLRDVFSIAPFTFATYILACLWTTGSSILSLYMAIMAVDLMSGPIQCVNDGGMGPLPALVYSFMASTLVSTLVERMKYGATIYFDTASLINLNSVQERHFNVFTWTPSKLFSSTTSKLEARAVNDTSYPEPWQFEEVAPGWAIIEQLCFKASIFCVAFIQACILLSLYLKKTSLEFKLLVVFGVYYPILLYTIPSDGVGGAEYTFWTSNPYYRRLAALYMLIFSPKYEEDIRKDEYEKTSRDLGVHRPDATALASNDIPRPLLWDLWSCIILDLPVLAFALTLPWSSPTNCIAKSLLLRLMTESIRSNVDLCLRMRSTFDDTCQQAERFYVP…
PC9H_000694	CDS	scaffold_1	2048979	2050058	-		hypothetical protein				ENOG410Q47I									MTIDEDNRHSSFWFEDGNLILHVQNCAFKIHKDIFSRHSRLSLSHDPESTPKALNSADNGQEAQYLRYVVPPERGVTADDVAVLLDYIYSNPPLTPSPLSPETPLSRLVSLIRVSSTGQLDLPTVHTASINQFVQLFPDNPTPAQYHEDLIQALLLALEFQIVAVQKRLFYSFVVASNLDLESFESIVQEDKPGGVSVVDVPSTSTSNPTLSPLPASQIKRCNDLMTKMVEHFTPLLFSPATTPHMACTDVFADTWMNLVIQPAIEDDGVCKPLETLERIKGVDWAAHGLCAECVREKRAEWNDEQVLIWNLMDEWLAVGPLAV
PC9H_000695	CDS	scaffold_1	2050227	2052572	+		hypothetical protein		PF00441;PF02770;PF02771;PF08028	IPR006091;IPR009075;IPR009100;IPR013786;IPR036250;IPR037069	ENOG410PK4F	I:(I) Lipid transport and metabolism		GO:0016627;GO:0050660;GO:0055114						MAHTTVQRGFHFLCKNSAQKLRLGSPTRYVSQTRQYGGMSLDGFTESQIQVREAIGSICSKYPDEYWAQKDMDGSYPSDLHRDLAAGGWLGICMPEKYGGSNLGISEATVMLQTIAESGAGIAGAQSIHANVYAMQPVWTFATEDQRNRWLPPIISGSQRACFGVTEPNTGLDTLNLQTRATRQGDKYIVNGKKISAQVAQKMVLLARTIPLDQLDNPLKGLSLFFADIKKEDGVTPKRGIDLQRISKMGGRAIDANQVFFDDFEIPVADRIGAEGEGFKQILHGMNAERCLLAGEALGIGLAALRRAARYASERVVFGRPIGQNQAIQHPLAQSWIDLEAAKLLTYSAAKAYDDRAADKGSSNTDVGAKCNAAKYFAAEVAFKACERAVMIHGGMGYS…
PC9H_000696	CDS	scaffold_1	2052939	2054432	-		hypothetical protein	EOG092R04D7	PF01399;PF10602	IPR000717;IPR011990;IPR019585;IPR035268;IPR036390	ENOG410PFGD	O:(O) Posttranslational modification, protein turnover, chaperones		GO:0030234;GO:0005515		1 (o211-229i)				MADDIVLPIPNLSLPQQLFVLSAPSLTALHENARTELLKNIEADQMAPYYRTVTSTSSASVPLDDALISAMEKSNAEELQKLDERLAEAEKQEGESEISDALRARANYLTRIGDKDRAVVAQKLALEKTPGLGSRIDIVLTLTRIGFFFGDHELITEHLTKAEALIEEGGDWDRRNRLKVYHGLHLLSIRQFKRGGELLLDALSTFTATELLSYNDFVALVVISCALTLSRVDLKKKIMDAAEVNQVLPEIPLLGDLVKSLYECHYDKFFVALARLEQEHLTPSRVLSPHARYYVREMRIRAYTQLLESYRSLTLDSLAAAFGVSVDFVDNELSRFIASGRLHCTIDKVNGIVETTRPELKAAQYDILIRQGDALLTGIQRLSKVLY
PC9H_000697	CDS	scaffold_1	2054524	2056050	+	RPN6	26S proteasome regulatory subunit rpn6	EOG092R0C2U	PF01399	IPR000717;IPR011990;IPR036390;IPR040773;IPR040780	ENOG410PJ50	O:(O) Posttranslational modification, protein turnover, chaperones		GO:0005515						MSAQELLDQAAACKETDPARAETLYKQVLEIEAASNQQESALAKLGELYRDQKNAEGVAQLITLSRGFMSSTAKAKTAKLIRTLLDFFNAIPNSQQIQIAVLKDNIDWAKQEKRIFLKHSLETRLVSLQLDTAQHKPALKLIDTLLTELKRLDDKLILTEVHLLESRAHLSLRNLPKAKAALTSSRTAANSIYCPPYLQSALDLQAGILHAEERDWTTAYSYFFEAFEGLSSLGEESALGAFKYMLLCKVMLNLPDDVNSLLTIKLALKYAQLREVESMRAIARAHQNRNLADFEKALRDYQEELTTDPIVRSHLTALYDTLLEQNLLRIVEPYSVVEIEYVAQIVGQERQAVETKLSKMILDKVFYGVLDQGRGCLIIYDEPEVDTMYGAAIDTLEQV…
PC9H_000698	CDS	scaffold_1	2059128	2060402	-		hypothetical protein		PF03330	IPR009009;IPR036908	ENOG410PTY4	S:(S) Function unknown			SignalP(1-20)					MLASFSFAAIVLAAVASVDAAVIPRTKAPAHYLEGYLEPYETYHTRYLAIGCHNNHGKQFFDDCCHPMLATESLEKNRKAYCVPSPEASSSAHAAEPTSTVTTPVDPIDDCDDDEEEGSHADEEDCDDEGSQDTPAPLPTPAPAPSSAPAPAPASQKPASTPESKPAATPESKPSPTPTPIPTPEASPEPKPETTAKPTVIVSSSKAPEPTKSIVDAAVDTVKDIVKGGFATFYYQHGVAGACGDVNPDSALIAALDYRTYGDTSKKSSHCGSKVNIKNTKNGKSVIVTVADACPTCKNEGSIDLSTAAFNEIASEDEGIVPIEWSFIRSH
PC9H_000699	CDS	scaffold_1	2060801	2062160	+		hypothetical protein		PF04144	IPR007273	ENOG410PMXP	U:(U) Intracellular trafficking, secretion, and vesicular transport		GO:0016021;GO:0015031		4 (i98-119o131-148i160-181o201-218i)				MSTYQNPFASSHSLDTNPFDDPAPPQSSSHAAEAARLEELRRREQDLERREQELTQKAEHIRKHGRNNWPPFFPLIFHSIQDEIPEASRPLVTRLYQLWLVLALTLILNMVACIFVLLAGSSDGGKDLGASIGYLVFISAASFLLWYRPIYNGYMKEQSLYYYFYFFFGGFHLLFSIYMIIGIPSTGSAGLIQTIQMYARHAWVAAVLGTVTTVGWTIQGLGNAFYYRQIYAHHTAAGHSMEKAKAELATHGAKAYFTRG
PC9H_000700	CDS	scaffold_1	2062821	2065234	+	PAB1_1	Protein phosphatase PP2A regulatory subunit B	EOG092R0AC9	PF00076;PF00658;PF13893	IPR000504;IPR002004;IPR003954;IPR006515;IPR012677;IPR035979;IPR036053	ENOG410PFWK	A:(A) RNA processing and modification		GO:0003676;GO:0003723						MASVAVAQPETVPQQGTSIPEQPAPVMAAPPAPAPAPAPYVAPAPAPSASPSASLYVGELDPTVTEAMLFEIFNMIGPVASIRVCRDAVTRRSLGYAYVNYLNAADGERALEQLNYSLIKNRACRIMWSQRDPALRKTGQGNIFIKNLDELIDNKALHDTFAAFGNVLSCKVATDDQGRSKGYGFVHYETAEAAESAIKAVNGMLLNDKKVYVGYHISRKERQSKMDEMRAQFTNLYVKNLDPEVTQEEFEALFNQYGSVTSAIVQVDEEGRSKGFGFVNYESHEEAQRAVDGLNDKEINGKKLFVARAQKKAEREEELRKSYEAAKMEKLNKYAGVNLYIKNLEDDVDDEKLRAEFEPFGTITSCKVMCDDKSKSKGFGFVCFSSPEEATKAVAEMNN…
PC9H_000701	CDS	scaffold_1	2065700	2067335	-		hypothetical protein		PF08241;PF13489;PF13649;PF13847	IPR029063	ENOG410PFNZ	S:(S) Function unknown								MSLYQHPVEYLSDRDDDSDYFRNVHGRALNALNERYMLPVDHDEVKRSELHHRMMQFVFNGKNYVGPVSEVLHGGHQRRVLDLGTGGGCWSVAIDIADEFPKVEVVGVDLAPIQPRSVPPNCTFELCDLDQWTLPYPDNHFDLIHARSMHTGISNYPRLVHEISRILKPGGLVILIEPDLMPIADGKPADEFGLPGWFAFWQTYRGCLKQQGIDTTVPSRLPQFLSATKAFHHIVTQDGNIPVGFWPKDPLLLTVGQLAWMDCDLFIPALKPLFLHAGLPESKVTKLIKEAQQDLYYPLLQISCKYHIVHAFKRN
PC9H_000702	CDS	scaffold_1	2067781	2068594	-	TMA22	Translation machinery-associated protein 22	EOG092R0PI7	PF01253	IPR001950;IPR005873;IPR036877	ENOG410PNU3	J:(J) Translation, ribosomal structure and biogenesis		GO:0003743;GO:0006413						MGRKNNVSSSNAPPPPAPEPGQPEGEAPQPRPPVQVLYCGVCTYPIEYCEFGSSLTKCKEWLKEEHPEQFDKYYSEEALQAKIGTLSLEAQTKLEKDTAKAEAKAEAKADAALKKKMSSQITIKRIERNKRKHITAVHGLEAFGIDLKKAAKQFASKFATGASVTKNAQGLDEVVVQGDVSDEIVDMIEQEAGVLKGIPVDNVEIVEEKKKKGGE
PC9H_000703	CDS	scaffold_1	2068749	2071559	-		hypothetical protein	EOG092R07DL		IPR009060;IPR011990;IPR013026;IPR019734;IPR036869	ENOG410PJMR	S:(S) Function unknown		GO:0005515						MSDAFADLWSSAAPPPQKKQPLQAYQAASNPSSRPITPGSSSALFNSQPRHTPNYTQPPPQHAPPKPSLTPKPTSGDPFGALLSGNLASAGGNGRLTMAEMAAKAQQERLDRHLNSHNQAGAQNGGGSAAVWAGLDVLATPSQTPSPPVKASNSNSLLDDADDWGFGTTTSTGSSKVEQVLAKPAVSTSNVLDDTFSFDAFGTTPKAPSKVPAAATASKSSMNVWDALDSFGDSAATAPLTQPTHDDADDLGFGPVPTKPPQPAITTSSTPQRSDSPSADFDFGSREYDDASPVPPVRRSRPSRGAPSPPPHILGQMVEMGFAPDKAKVALINTYKEPESRARKDAGWDVEEAVSSLINGGGGSTSRTPEPRRASPDDYPSSSTRGRPKPPIRGDSLSR…
PC9H_000704	CDS	scaffold_1	2071705	2074064	-	SPT8	Transcription factor spt8			IPR001680;IPR015943;IPR017986;IPR036322	ENOG410PHS7	K:(K) Transcription		GO:0005515						MPSDSEEEIEDVDFDLDEDAEPDLEDEGLLDGIEVADDATEDGDDDSGSDDSDEGSDDDDEEASEPSMDPTLLDLELAEEPLQSPNEPDSAKSAMPPGPPSSNTSTQPSKPPSPAPAPLRSLVLSPENARRRGLLIMSGPGVPAPRTYTVEAICALPHPGPTNALAATPCMLHLLTGSDDGYIRDYDIFSAVNSKNFLSAPQRHHSGVVEGILKAGQLRFWWENPSYAPPVNGMVQMEEEPPLVPVYSLAMHSDALWALAGTDVGHINLFTVRHEPGRLCHVLAGGHRSRVSALSLDHDEKSLFSAGWDAEALQWDLNTGQIVRNFTAHNAQLSGIAVRPANAVYHEDGTPITIRRVSASEGALSQHPTQETLIGSEMDLSASSTAIASQSQPMAVDSS…
PC9H_000705	CDS	scaffold_1	2074184	2076361	+	SRP54	Signal recognition particle	EOG092R08J0	PF00448;PF02881;PF02978	IPR000897;IPR004125;IPR006325;IPR013822;IPR022941;IPR027417;IPR036891;IPR042101	ENOG410PH16	U:(U) Intracellular trafficking, secretion, and vesicular transport		GO:0048500;GO:0005525;GO:0003924;GO:0008312;GO:0006614		1 (o529-551i)				MVLADLGRKLNAALSSLNRAPVVDEKVLDATLKEITAALLESDVNVKLVASLRQKVKVKVKAALEGGDKSKETNRKHLIQKAVFDELVNLVDPGVEPYKPKKGQSNVIMAVGLQGNGKTTTCTKLAVHYQKRGFRSAIVCADTFRAGAFDQTRQSATKAKVAYFGSYTETDPVAIAAQGVAKFKKERFEVIIVDTSGRHKQESELFEEMVQISEAVQPNMTVMILDASIGQAAEAQSRAFKESADFGAIIVTKMDGHAKGGGAISAVAATKTPIIFLGVGEHLHDLDRFSPQPFISKLLGLGDVQGLMEHMQDLASQNPDKQKEMAKKLEEGKLSIRDWREQISNVMNMGPLSKIASMIPGLPQDLLQGSDEEGSLRLKRMIYMTDSMTASELDSDGSP…
PC9H_000706	CDS	scaffold_1	2076529	2077616	+		hypothetical protein		PF00472	IPR000352	ENOG410PSDE	J:(J) Translation, ribosomal structure and biogenesis		GO:0003747;GO:0006415						MSITPSLRAAARSAYRDLWRAARTTFSGDEPVFQAFRDKMRTDALRLNQVASPEAYSSGIATTKEIASVLRKNVVQASLASEPDPEGQSLWKLRMTRDTELGSNDSIKNPDPMPSSRSSRRQKYKPPVNDIRFYSALKRAHKDRVVPDLREEDLEESFVRGSGPGGQAINKTMSNVQLLHKPTGIRVNCQETRSLELNRRFARRILVEKLDRIQNPGLSKGELQRAKQRERERRRRKKAKKKAQGKEKLAEP
PC9H_000707	CDS	scaffold_1	2077829	2079818	+		hypothetical protein	EOG092R0BY6	PF01213;PF08603	IPR001837;IPR006599;IPR013912;IPR013992;IPR016098;IPR017901;IPR028419;IPR036222;IPR036223	ENOG410PIFG	T:(T) Signal transduction mechanisms;Z:(Z) Cytoskeleton		GO:0003779;GO:0000902;GO:0007010;GO:0007015						MSGGGGLYSLATIIKRLEAATSRIEDIVHVQDGLRPAPRAVEGSSAPTSDTTTTASAAPAPPPPPPAPTAAPPAEEPRSVLAFDEVILEGKLKPFIQATREFPCQALVEQVDLVEREFKTLRSVILMAAQCQKPDQKTWGEVLAPLQADIESITRLKEANRKDRNWFTHMSTISEGAPVVGWITVELKPAPYVKDIVDSTMFYGNRVIKEFKDKEPKHAEWVKAYIAVLEEVRKYILEHHTTGLFWNPKGTTVEQYLASGKAPAAGAAPPPPPPPPPPPVLAPPPPAAAPAASGPAAVFAELNRGEEVTKGLRKVDKSEMTHKNPALRASSVVPAASSPPKKPTKPAKPHALAGKKPPKFALEGSKWVIEYQENEPTLVVEEGQINQTVNLYKCNKCTI…
PC9H_000708	CDS	scaffold_1	2080030	2083343	+		hypothetical protein				ENOG410PGCZ	S:(S) Function unknown								MDNAGWHAQRRAAREQHDAYLRREDDVHPLDERFIGGFVPGLPPSPMPPPVPAKDYFPSVVSPTHSQGTTISSSTLATMTAVERSQILRVARMEPHLQFMVGPLLRYDTVDHEGIWHGAALIVTADSGSVYEPHPMLTYEWDPDKSTQPVENTLRNGRGRSFDLGPHPADPHSVIPSLGSAMHPNGHAQQGPNAVLHQIPGQEIYVYAGQGGTFTFWRFLIDIPLGPKEMSISYTINNGQAIQFFVPGRNENMKWAAHSCNGFSAGVNPDDFRGPGYQSGYDPVWVDLLSKHNREHFHVMVGGGDQLYCDSLTREPELQEWVSALKPEAKKTHPLTDDIAETIDHFFFNHYCQCFRRGAFARANSTIPMINMADDHDPEDLQMAPVFRRIGSRGYFFFL…
PC9H_000709	CDS	scaffold_1	2083407	2085306	-		hypothetical protein	EOG092R07A5	PF00622	IPR001870;IPR003877;IPR013320;IPR037353	ENOG410PGAS	B:(B) Chromatin structure and dynamics;K:(K) Transcription		GO:0048188;GO:0005515;GO:0051568						MFAAGSPDPSREESPATVLTASNAKVAGKKRKRVPGAASSPAPSDLGNASQSTPPPETRLSAAGPLAKYRDPIFVAISEGSEYYNTEQLPMNRMGFRYIPAGATLSNGILTCHTTETTPASYRVSWEDRSPFVRVTKDGLGLLGDKGFRSARCNAPIREGSWFMEVKIERGGGEHSGDNNQPEGSHVRLGWGRREAPLNGPVGLDGYSYGIRDKSGEKVTLSRPRPYGRPFKSGDVVGMYISLPPRRKANPKDPNDPAHLKRQRIAIDLRGQTYFEALEYPQCKEMTSLMDYSGKSTSSASVPSSGKKSATVKNLPERGRPKATQPEAATTRPLPTLSNSSIAFFVNGEFQGAAFEDLYDYLPLKATDSSRKVKEKRRTRDNAHEHKENPFDDGQLGYY…
PC9H_000710	CDS	scaffold_1	2085441	2086415	+		hypothetical protein		PF00179	IPR000608;IPR016135	ENOG410QDSS	O:(O) Posttranslational modification, protein turnover, chaperones								MSASPAVVRRLQKELRDITLNPIDGLHVEPNDDNMFQWKCSIKAAPDSPYAKGTFHFTLELPKNFPFKAPTVTFTTKIYHPGINDEGAICVPILRDEWKPSVSLSTVLIIIQEKLNNPSPDDPFEPDIAAVLKNDKAKFLATAKEHTKKWDRFAALIAHILTLHFSGMPCENGR
PC9H_000711	CDS	scaffold_1	2086778	2091722	+		hypothetical protein				ENOG410PZNH									MNRFRKKSDAKRSQVPLTARTNSPPVREILPELPPASDFRTSLILPDLSRRFTLLRTSTGDPITLDDLRSRFAEQRAKGASNHISEEEEDMILETLGRMRGKALNGRNTPDNSPRQTEYSTGAGRYSVRSNDTEVTESSSVVGSIQSSPSGRSNRYSNNLFGSGRLRDYSYARNATTQSKTGSTRSALSFTPTESSASVKNVEDTRPVTPEQSGSDSLPSSPSENLHSSQETAHAGTPPSSDHSIKPVNPSALRRASLALEKVIKEIEEEGEDEIVMPRSTPTTRYNGAIEADRPLEVRQSISETSTVGEVEAVVAISSDTRPELDSHRVSPVPFRIAPGYIPGMPRPMTPRDNMEFDDRSHSTTPRATSPAYAASIETNSPTTSKISSLSRFGRNSPS…
PC9H_000712	CDS	scaffold_1	2091860	2092549	-		hypothetical protein				ENOG410Q34X									MAPSTFNLFFTGRDDPRHWVIIGEDTKPVLICFETPELGGMSSVKTTVFRNDREHVASFEWAPGNHLGRASIGRRYLPMSQLVASSNTGRCFTSADGQRYEWRPSQSSYHLYAPGNRHIAIYTLQPQATPVGPAHGILQYTFSHDLLLLESLLALSLNRWIDIHGM
PC9H_000713	CDS	scaffold_1	2092951	2094446	-		hypothetical protein			IPR011333	ENOG410PTZM									MSTSPSTFGTLNGNGVTTNGATSHSATYPSINGSPASSSAYPLNGDSRPVYQNQFEGIVNHIYQSGFQTGNYADTHLHVYHSVYRLHAIILSRSPYLVHLMSTSPQTGGVRTIYVQVEQEPEITQEGFAIALGYLYSPISLNNIRPDNARAVLAAGCLLGGMEELCQYAYETCRQSLSVENIVHWIEFIGSLPPPSDGSTTPEPLPTTIFGAYADRLREDVFHFLVVTLPEVLDARGTSTSPPQSQTQQPQGPSGREVLLQIFSRVPFEIFKAAVESPTFQIGSDRARYEFAKEAVELRKHGVARGQGAEETVVLAFGGGNTNGSAVHVARKMRKRPLWKVNA
PC9H_000714	CDS	scaffold_1	2094640	2095589	-		hypothetical protein		PF09764	IPR023128;IPR037132;IPR039733	ENOG410PZ7D	O:(O) Posttranslational modification, protein turnover, chaperones		GO:0016811;GO:0070773;GO:0008418						MAGCCACPPPLPAEFKSTAFWCEENVYLLIQRFLLSHQISASCDIFAIIISNVDKSVALWNQKLAQQDLYPVVWDYHVVMALRLRTAPSSEVQQSEGADDQGDTAGAICRCWVYDFDTRLGLPCPAEKYITQSFCPCPARFQSMFRVVPGQDYIDYFASDRSHMLSPSSSQLQIKGQRPEYSKPPPDYPCLVGKKAAEAGVTNNLMQSFVAMDAQGLGTMYGRVLTLQEMVHWISVVQ
PC9H_000715	CDS	scaffold_1	2096260	2096569	-		hypothetical protein				ENOG410Q32U									MAQSSLLDSFDPFATHPFTNISGVIPQPPAPSRYAIPQRPRASTSQTSSASSSPSSSQGSSPTLQSPQPRPFASSPPQPVFVPFRQETSSPDLVLKKKGLRY
PC9H_000716	CDS	scaffold_1	2097773	2098863	-	ATP12	ATP synthase complex assembly protein atp12	EOG092R0MKD	PF07542	IPR011419;IPR023335;IPR042272	ENOG410PHTY	C:(C) Energy production and conversion		GO:0043461						MRWNSSLAAETTRPDGPVISETNRAEATLKRFWKTVGIDTHGDSLAVTLDKRALKTPSGNKMLLPQNKRLVATLIAGEWDSQETMLKPHALPMTSIASRALDAMSDEQTRHDVRDALLKYLDTDTICFHQEEPPLLAELQSTHWVPLLEWARSTFDVEIQTSESILLSEQPEETKRKLGAVLDTFDPWEMAAMERATYTTKSFLIALALVKKQLSIEQAAKAAQIEVDSQIQRWGEVEDSHDVDFHDVRRQLGSAACLLSYT
PC9H_000717	CDS	scaffold_1	2099108	2103478	+	MSH3	Mismatch repair protein msh3		PF00488;PF01624;PF05188;PF05192	IPR000432;IPR007695;IPR007696;IPR007860;IPR016151;IPR017261;IPR027417;IPR036187;IPR036678	ENOG410PGVC	L:(L) Replication, recombination and repair		GO:0030983;GO:0005524;GO:0006298						MSPRASNSQIPISKYFSPPSRKRAGSEVIDLTQSDSDDAEPRSQRAQKRARTTTAPASSQGQRAAGRPSVERWRFTPSPLKTVTTGDATAVLPEVREAFRRKLLTSSQVGGEPPSTPKASKGKGRAQEPQEEFTASPISSGLGSPPSDGDQAFNELTALFPKKSKGKKIKAPPVRKVVSKAPERVGPSGQTYTPLEEQILKLKADNPGTLLMVEIGYKYKFFGEDAEIASKTLGVACYPDRNFSVAFIPVDRLNIHLKNLLSQGHRVGIVQQTETAALKKVSDTRNDVFERKLTHLYTAATYVDEIDSVDDTDKYISPPLMCLIEKSKKGATKVNVNIAMITVCPHTGDVTWDEFEDGPMRIELETRLAHTQPAELLLPAELSKATEKMLAHFTTMSPT…
PC9H_000718	CDS	scaffold_1	2103497	2107541	-	POL5	DNA-directed DNA polymerase		PF04931	IPR007015;IPR016024	ENOG410PFQC	K:(K) Transcription		GO:0005730;GO:0008134;GO:0003677;GO:0006355						MSTTLPLFWHLSSNSKQERIDASLKLITALNQFQAQFTPKVDARGSGDDESDKEDAEAEGLDALNAHDVVYSIRRLIRGLSSPRESSRLGFAVALTELLSQLETVTCSQILSLILDNSKPPTSATGQEERDSLFARLFGLTSVIQSRLLVNTKALSASASSTTAISDIGTFNEVISQLLILGEKKSWLRESAWWSISLAVDVLEASDVPWKKEAVKSTIDKLLVEQQHWSPEKIALALKLQTQYPAHDWKALLAPTFKNPQLLSNANLLNIARLMKACHEDDENEGSKSVAGGWKPQIHFAWKAILDRFFASESPSPPVSFQEFFRVVVDESLFASNSSPQRKYWGFQVFQAALPRLDGTTLSMLFTKNFMRTWINHLSHQDRYLHKAAKQVATDIQAT…
PC9H_000719	CDS	scaffold_1	2107774	2108467	-		hypothetical protein				ENOG410Q3TU									MQMEVEFPPSLNFSNKRSRSSSPAPHERPTKRLFLNHAESEAFNGFDHTPPMSLSGSSRNGSRQPSEDWVRQANDLRIDSPLTTDPMNEALQGTIVERYPITDEDVMMDVAMISSQQMKEDAEPPSNPTSASAILPPPFLAETPLAQQDSSLLAVPSVPRFQPQGDPKPRPRMTMGPRAGCEKCQLGVKGHWMHLS
PC9H_000720	CDS	scaffold_1	2108632	2111391	-		hypothetical protein		PF00534;PF13692	IPR001296	ENOG410PHGT	M:(M) Cell wall/membrane/envelope biogenesis								MSTHHQFESKPSTAIRRRLSSSVSSKQRPNMTTTFASLTPMWAGVAGTLVNNNTQYEIAVTVHDGVYSTDFASVIIPVTSGDTAKNSKDIEAQVLNLIRKFSAEHLCKFLGAGITLALLKECPNLCTRLWLDMDIVPIVFNIKPFHTDSVTRPNIKHRISSTTGSYVPSGSETPTVYVEAAHLGDPSHLSPNAAQKLPIPRTLDEQSDSAARKCLMYFGPNNNPRLSIGARNQVTVDAGGKIHLIDDLEEYRKTVGTGTWNAVIKLADELREKKVKIGFFSSTPQGGGVALMRHALIRFLTALDVDVAWYVPNPSPQVFRTTKNNHNILQGVAAPDLRLTQEAKDAFDAWILKNGLRWTAEGGPLAPGGVDVVFIDDPQMPGLIPLIKKVRPEVPIVYR…
PC9H_000721	CDS	scaffold_1	2111657	2113656	+		hypothetical protein			IPR000812;IPR036915	ENOG410Q474			GO:0070897;GO:0006355						MSRNCGECGGTTVWDEDASSSICQSCGTLTDPSQSVLSSHIDQPENTRQNHFLNPNSAATTLKSFRTRQGWDLAGQGKEARESRNTYTMHEFIRSFCAALSVPGLSPRVIILFTQAMAAGQFRWGRTAKRVAGACLAIALRETNRPDAIRDVASILEESPVVLTRTFMSVLTLLNHNLSPVDPAMHVPALELHLNSIVRNPETSNIPSTLVKKLRMLHIPSVIRTVQSLSDIIYRLGEDSEVTTLPTGPTAAALLILAAEAETRSSLPNIKELAQCLASTASWQASVVMARYKLLSDLILGCVDKIPWLDKYETVKGRAKVARRIVVARSIKDMIQFYEDIWVQKREELRKNVSFDHGEAICDFDNDVTEMSSSSSIYSAQDDAGKAPLGPPRKKRRVD…
PC9H_000722	CDS	scaffold_1	2114112	2115874	-		hypothetical protein		PF01569	IPR000326;IPR036938	ENOG410PJG4	I:(I) Lipid transport and metabolism				6 (i49-68o116-136i148-165o217-235i247-265o277-296i)				MAYYQLDEPHLPPLSQRIREFIPMRTLFARPPNAEPKRPPITPARRRKLLLSYAPDWILTIVLAYVIAARSPSLADLTTSALFFLLDKIDGFKREFSLEDTSLRHPYAEHERVPNLALIFICFVAPVVLLPIINLLTVRSWWDLHNSWLGLVLGLSLTGAVTQFTKVTVGRPRPDVISRCQPIPGSVDPTYGLSTFNICTQTDEAILRDGFRSFPSGHSSLSFAGLGFLSFYLAGKLHLFDKRGHAGKAWLALLPFSGAALVAISRTMDYRHHWHDVLVGSILGSVLSFFAYRQYYPGLSTELSHRPYSPRIKREEDDILPVHSHSRDDSVSTELAFRTPSAPPGTGRPARYGYRETAEDTAYYPPDHLESTVPRPNPGSLEEIWEEEPRDGRDSNTPT…
PC9H_000723	CDS	scaffold_1	2115968	2117099	+		hypothetical protein			IPR015267	ENOG410PU1T	S:(S) Function unknown		GO:0030289;GO:0019888						MSSDNACSIASDFDAPDYDALLQQIASTDVVDHYEACSFEWSKLRDIIKYKIEKNIALFLTDESTNQSPPTPRPFTPISLASGGLKLPPFPPRKTSPNGTAVAAPVNYMNNAQIDEMKEYIFAQLHTFDTNPPFTVQRLCELVVNPQQHYNCIGKYLRAVEKSMLVTSTWDAFPIPPSNETEPTLRTVLSTGTSSLNAPATPLFSPIPFLHEDARRSKSRSPPPSPLVLPTAGLVTGGTSETPETKSLGLVDELDDPSPGHMSDHPTALSAVTTVGPNSGARPLFPALEDRFVKSENAEGESSKAMQSDT
PC9H_000724	CDS	scaffold_1	2117172	2117795	-		hypothetical protein				ENOG410Q3FH									MAPVQSGAKKKRPPTFQHFPEKRARALKKTWVETAKIKSQWKAEKRKANLLGAARPAQDDVEEDGNDSEVQDDLADSQVTSNQSKRDPQTFIAEAIPHRDSQPSGSMSLPKRNKSSHSHPQTHPRQGSSSHSSAQKPPKAPAPHPSNRQATGRTKQKPTFTHTRHGQPNMGLRMGAMLEKIKKDFA
PC9H_000725	CDS	scaffold_1	2118019	2118536	+	SUI1	Eukaryotic translation initiation factor eIF-1	EOG092R0PLB	PF01253	IPR001950;IPR005874;IPR036877	ENOG410PNPS	J:(J) Translation, ribosomal structure and biogenesis		GO:0003743;GO:0006413						MSVQNLTAFDPFADEGDLGNNQDVGSQQNYIHIRIQQRNGRKTLTTLQGLPTEYDAKKLLKAFKKEFACNGTLVEDEEMGQVIQLQGDQRLKISNFLTENGIDKKTIKLHGF
PC9H_000726	CDS	scaffold_1	2118803	2119716	-		hypothetical protein		PF08648	IPR013957	ENOG410PSRF	A:(A) RNA processing and modification		GO:0008380						MSSRGDYRRRDRSWEKGDRERSHRSERGGRGGRGGNYRDEPRRRSSRSRSPRRGERDRRHDSDRREHGPDKDYDRVDKSRYSRDDHHRRDDRRDRERDVDRRDRREPSRRDHEKPSRVEDTVQDQPPKATPPPAQNDTRDPKDHMDVAEEGETEEVEQDDSAMMAMMGMSGFGTTKACFEGNQEGGADIKKIRTWRQYMNRRGGFNRPLDKIK
PC9H_000727	CDS	scaffold_1	2119808	2120464	+		hypothetical protein				ENOG410Q44C									MAAQVRRFAAGLGEASRAYKETWDRCVHIELQKVPSTTTPKDIRRALGHARLQGVSDVAIIYRGFRPTNRALLTLVHNSYLRQNLKALEKLTLVGLPIDSEPVLLSSSEAQESQARQRGSKGRTDAAERGAVTGDGPNGGVPNNGKNVVVWGLPLRIHSDIFRELLTGFKLAELDQGPDIMRVHS
PC9H_000728	CDS	scaffold_1	2120732	2121634	-	CBC2	nuclear cap binding complex subunit	EOG092R0KT6	PF00076	IPR000504;IPR012677;IPR027157;IPR034148;IPR035979	ENOG410PN15	A:(A) RNA processing and modification		GO:0005846;GO:0003676;GO:0000339;GO:0045292						MAHIVTPLDQPSNYKDSQSKVDRQKHTDLLAKSTTLYIGNLSFYTTEEQIYEIFSKCASSEDGGGIKRIIMGLDRNTRTPCGFCFVEYYTHAEALASMRYVSGTKLDERIIRCDLDLGYKEGRQFGRGKSGGQVRDEHRQDYDPGRGGWGAQAQRLEMERRREVEERYADAQDGVGAVAGGGDDWKDNSGSGVTDSKKRARSPDDDGEGRMGQRARIDEDIEAERM
PC9H_000729	CDS	scaffold_1	2122335	2124027	+	RPT3	26S proteasome regulatory subunit 6B	EOG092R0BF1	PF00004;PF07724;PF07728	IPR003593;IPR003959;IPR003960;IPR005937;IPR027417;IPR032501;IPR035256	ENOG410PGYA	O:(O) Posttranslational modification, protein turnover, chaperones		GO:0005737;GO:0005524;GO:0016787;GO:0036402;GO:0030163						MDEIGIELSKEEPTFESVVTEKTALYQELQEEDLYIKYKKLTRHLEMLEIQESYIKDEQMNLKRELIRAQEEVKRIQSVPLVIGQFLEPIDQHTAIVGSTTGSNYVVRILSTLDRELLKPSSSVALHRHSNALVDILPPEADSSISMLGKEEKPDVAYQDVGGMDSQKQEIREAVELPLTHFDLYKKIGIDPPRGVLLYGPPGTGKTMLVKAVAHHTTASFIRVVGSEFVQKYLGEGPRMVRDVFRLARENAPSIIFIDEIDAIATKRFDAQTGADREVQRILLELLNQMDGFDQGSNVKVIMATNRADTLDPALLRPGRLDRKIEFPLPSRRERRLIFQTVTGKMNLGPDVDLEDYVSRPDRLSSAEIASIVQAAGLQAVRKNRYVILPVDFEEAWKQ…
PC9H_000730	CDS	scaffold_1	2124542	2125742	-	PRO3	delta 1-pyrroline-5-carboxylate reductase		PF03807;PF14748	IPR000304;IPR008927;IPR028939;IPR029036;IPR036291	ENOG410PFDI	E:(E) Amino acid transport and metabolism		GO:0004735;GO:0006561;GO:0055114	SignalP(1-23)					MGYTLCVLGCGTMGIAILSGVVASLEPHRNKSDFPKWESHTPGTLTPVNTPDVTVPTRFIACVSKEQSGKKLTATFANLGRQVEIVVSNNLWAVQQADVILLCCKPQLAHTILEEPGMRQALDSKLLISILAGVTLSQLNEWILPSTTVIRAMPNTPCKIREGMTVVSPIPESAEAERDTARILKIFSSIGRCRFLEEKHFDACTALSGSGPAFACIFLEAMADGGVMMGLPRAEALELAAQTLQGAARMVLQVGAHPAQIKDAVTTPGGCTIAGLLALEDGRVRSTIARGIQIATERASELGQPGKK
PC9H_000731	CDS	scaffold_1	2125818	2126435	+	ALG13	N-acetylglucosaminyldiphosphodolichol N-acetylglucosaminyltransferase catalytic subunit alg13		PF04101	IPR007235;IPR039042	ENOG410PRX7	G:(G) Carbohydrate transport and metabolism		GO:0016758;GO:0006488				GT28		MLVFVTVGSTKFDALIQAVLSADVLQCLQAKGYTSLVVQCGNSRTDEPVPNEGKTKMRREGVDIELWKFKPSLEEEYENADLIVSHAGSGTILDVLRRDKPLIVVPNPTLLDNHQQELARALSEQSYLLRSSVDPSELSQVIRDLVPSELRKFPAMDGSRFRQILDEEMGFL
PC9H_000732	CDS	scaffold_1	2126482	2127473	+	TRM9	tRNA methyltransferase, has a role in tRNA modification		PF08241;PF13649	IPR013216;IPR029063;IPR032873	ENOG410PMYZ	Q:(Q) Secondary metabolites biosynthesis, transport and catabolism		GO:0008168;GO:0016300;GO:0002098						MPPKVEATVVDQDAQKYEQLHVHEVYEQIAGHFSSTRYKPWPIIACFLASLPTGWVGLDSGTGNGKYLPLPADRPGCLMTIGMDRSQNLLNAARTAGGTDVIREVVRGDVLDNPWRRGIFDYCISIATIHHLATHERRKLAVQRTLQAVSPNHGRVLIYVWAIDQDELSKRQIPKDNETRAGQDVFVPWVLSTQKKSEADSVQTQSQVYNRYYHMFAEGELSALVHEAATELGMLVDRESSNGDPGTRGVEVVQDGWERSNYYVELRLWENGQI
PC9H_000733	CDS	scaffold_1	2127536	2128275	-	EGD2	GAL4 enhancer protein		PF01849	IPR002715;IPR016641;IPR038187	ENOG410PN4Z	K:(K) Transcription		GO:0005854						MSHIEEVASDHSDHDHDHDDHEHDQEEDPTSAAALDKIQSRSERKARKALLSLGLKRVPNITRVTLRRPKNVLFVLASPDVYKSPNSDCYIVFGEAKMEDMNSQAGLGAAQQMPSGGGVPELERSAAGGADDDDDIPELEAPEDDGPVDETGIDQKDIDLVMQQVNCSRAKAVRALKDSGGDLINAIMAASE
PC9H_000734	CDS	scaffold_1	2128800	2134508	+	HSP90	Heat shock protein 90	EOG092R05VL	PF00183;PF02518;PF13589	IPR001404;IPR003594;IPR019805;IPR020568;IPR020575;IPR036890;IPR037196	ENOG410PHYZ	O:(O) Posttranslational modification, protein turnover, chaperones		GO:0005524;GO:0051082;GO:0006457						MPQSLLLRQLRAVLDKNESVSLTQLLTTVDDLVLATSADSENTNDSDLDDELQTIHDECADHSPYHLEVFLAVLFHLCPITPPISIISSWFDLVLRPALREPKLPKVAVKHAKELIIHALQQPDPDTSSDDGSRAGKKAMPSELRRRLMDLYLLDAFNEGSGGDILEWAELDQEQKESRACWKANLEDILLKYGAEHPQASDFLLSTNFRQDLMTEVYMHFSAPSARLQLLMFLNLYTSEPPFQQSASILAPHPLMTSLLSCLLLDKSSTVCNIALTLIVKILPIFAVHANDELENMLPSLFAILARMMCWKERPPSTHLDDPDDDYSADAEVLEPSMEDSLQLRADHAWQRLELSFESTSSSPPSPRQFFTMLYYLFPCNVLLFLRKPVGHLTANNLV…
PC9H_000735	CDS	scaffold_1	2134896	2135558	+		hypothetical protein													MPTVVAPQPTRPMALLSLSTPPPPMLGSPIELTRRDTESHRATWAPKQRPARRAPRRQLFSSYSRSHCCCVECPIIPSSRPPLHFSATDALDLPFQPITQEVDLPSAGPGPIRRRKALTRPSPLEPPRNHPYLLDIDIPSLRDARPITPTRSAPPNHQIQFRNLMPVLLCDIDDESPSPHSPALQ
PC9H_000736	CDS	scaffold_1	2137295	2138558	+	SER1	Phosphoserine transaminase	EOG092R0AJO	PF00266	IPR000192;IPR015421;IPR015422;IPR015424;IPR022278	ENOG410PFY6	E:(E) Amino acid transport and metabolism		GO:0003824;GO:0004648;GO:0006564						MTRVINFGAGPSALPQSVLEEAAKGLLNFHGTGIGVAEISHRSKAFTGFLTSLESLIRTQLDVPATHSILFTQGGGTGQFSAVVLNLLARHRLLHPDLTDAERHLDYVITGSWSKKGADEAKRLGGGTVNIAVDSRPYSKDGKSFDNIPTHDRYSFSPDPALIYYCENETVDGVQFGYEEGDQTSFPFELFPQGTLLPLVADYSSSFMSRPIPRLADHAVIYAGAQKNIGPAGLTILIVRQDCLVDVDAAAKLGAVPVPLSMSYKVLADAKSLYNTPSVLPIYIAGLVLERMKENGGMPYYEDVNRRKAEKVYAALKRGEAKGVMQSKVKEGGGRSWMNVVFDIVGGPDALSKFISGAEAKGLHELKGHRSVGGVRASLYNAITEDQVDQLVAYMDEFT…
PC9H_000737	tRNA	scaffold_1	2138642	2138745	+		tRNA-Ser
PC9H_000738	CDS	scaffold_1	2138809	2140584	-	MCH1	Putative monocarboxylate transporter mch1		PF06813;PF07690	IPR011701;IPR036259	ENOG410PHCI	U:(U) Intracellular trafficking, secretion, and vesicular transport		GO:0016021;GO:0055085		10 (i22-44o83-105i126-146o158-181i193-212o258-285i346- 371o377-402i414-433o453-472i)				MIGANTYPLMELRLSLPVVRKGVACCSIIVNALFAGGIFIFPIISPALVSHLKLTQPQLTTIVLAGMVGQYPFSVLVGYMIDYYGPAACSLVASVMFSAAFSCFSHEISMAPDDVNVFSSATFYKLTLYFFVAGLGTVFSYFSLLFSAAQCFPNHPGIASGLSTAVFGLSPLFLSLLASNLFTTASGLQVIPFLRFLAICTGVVHLCGFVTLRIPKPTPVPLAQPSEHTPLLQSAPGEPGTQQQPRDDSLLGLLSDRFFWILFLACVLTLGYCEMIISNIGTIVLSVSKSTVHSQESMEAIASQQVRLISFSNTASRIVVGPLADFISPVASHLPSGLRALPSHHFISRVAFISVPTALLVISSLVMIFTIDEPQKIWILSAGIGMSYGTIFTLLPSIL…
PC9H_000739	CDS	scaffold_1	2140720	2141862	+		hypothetical protein				ENOG410Q4G3					4 (i44-66o78-98i110-127o147-173i)				MPLSLFLVDGPFSFFNPYPSTFLVKAGPKIMEAFSPLFVKLRTLLFSCIIGLSFLWILLLSLDIFLQWEVSGTTDRSFLVVFLLINVITIIMLPIMMLREFRPWLDAARFLLLSLCHIGFAVMFSYWNPRIQCPDRTPDQEGVCKLLNLYLLVASWIIPVLLIVYMSGLAYVVSRRRARAKLEEDIETPSVTTEVDRTSTQLTLKYPLPAVHRDSVQRSSISSDVESGSAEKSRFSTSTRRSTRLSKRLPDFYFS
PC9H_000740	CDS	scaffold_1	2142178	2146467	+		hypothetical protein		PF00566;PF03398	IPR000195;IPR005061;IPR035969;IPR042277	ENOG410PSCB	Z:(Z) Cytoskeleton		GO:0015031						MDDPAWDAPSVKTLLRLTSQKLGQIQDRKDAQSQITRRDIATLLQQDNVGLARAKAQNAILEDSKGDLLELLEMYVGMLLEHFGQLEQGYGVASPPDGKSPSPSPIVTEAASSIIFAAPHTESKELNTVRDILIQRLGPDFARAVAGNRDNYVPPKVVSALSTPPPSAAKLDDYLLNIAKIYRINWEPDLRRQDTVDPLSEIMDPELTPVVDLPRLRKLCMHGIPDEPVWLRPRLWKLLLGFLPVVKSSWSTEHQKYRESYYDLIRRLLPPIVGSPPPLTPPNSSDSLLLMVHKHLLYVAPGLFAGLETGPEDVERCPLDPSAPEDIQISCATALDDRLVKLLGPAEVVPSTPEIRLEHDSSDSPSMSTHDSAESWISRSTTLLPSKPIGIADVHPKHA…
PC9H_000741	CDS	scaffold_1	2146551	2147292	-		hypothetical protein		PF10181	IPR019328	ENOG410PTFS	H:(H) Coenzyme transport and metabolism		GO:0017176		1 (i67-84o)				MNIYRPLASTHPQFTVLEFPGFKEYRVENWRLSRNGTGKIIHATSGLTWREACHAFILTYIWPKTSGSTLATIFIVLCCIWIIYSKCTQVLYESVIVMPSHGIQLETHRGLPPLRLAVSRRFIPFSTLQDIFIHEGLKRWDVRFYLAALRHVGNGHLNIDVCFPNVLPYFPVLLLTYQGIQEILDTKPRE
PC9H_000742	CDS	scaffold_1	2147512	2149432	+	EXG3	Glucan 1,3-beta-glucosidase 3		PF00150	IPR001547;IPR017853	ENOG410PFKX	G:(G) Carbohydrate transport and metabolism		GO:0004553;GO:0005975				GH5_50;GH5_49;GH5_9;GH5_14;GH5;GH5_45;GH5_15;GH5_22;GH5_46		MLGLVPASQKQVFGAPSPQQLSMDSPTMNTHQNDTFFHANQAHDQCYVEPYIAAPEPNIHFPAFNQEEANIFRYRQQQGVNLGSWFVHENWMQPTTMFDCASGNKESEYDIASGWGSKASARALLEKHWDTFIGPADFAYLAGIGINTVRLPIGYWSLGPEFCKGTLFESVADVYTNSWSRVLQAIKWAGASGIGVLVDLHGAPGSQNGESHSGVSDHKAQLFDSDNREKTIKVLQYIAQQLCNINHIVGIQILNEPKEHEMLAAFYDEAMAAMNCSIPKYIHDAFNLAKYSEYNSHRQDFVVVDHHSYFVFTDKDNTESASGHTQDVGSSIAANLAAHSSQQRGNLIIGEWSCALSSQSVKKENDPEASQKEFCTRQMETYGANTAGWTFWSYMKEGC…
PC9H_000743	CDS	scaffold_1	2149626	2154093	+		hypothetical protein	EOG092R01SG	PF12584	IPR022233	ENOG410PJJT	S:(S) Function unknown								MSGERVLVSYHAPNAYLASESWKQIRSALVSQFPLRNLHWKSPSRSIKTIQELDLNLVAFDSLHDEHTSQVPATLLEKPLLNIYIVACEDTDFDSYKNTIKKQIKDWHSVVASRKHQEWLILHVVRPDARTAGGNFFQMKYSVFERIKTDFNAEKRDRCVQMVWSALQENPAVWADLMSKTKDGLITAFESAVNQREEDVRRSESQRAMPGWNFCTFFILKESLASSIQGLSLYEDAYMQYAELESSFQQVLKEKNASWFGTFIQPSPRDDSLPLLSTDKKPYRDLILANTISVFDLRTYILARQCTLLWKLGRINDVGRAVTSFLSTFGRLLRDHETPLPEFFVESWIYSSCLSVVEQCDSWTSNQTLEGAKLAVYNASKGELLELALNQLSTIGVAV…
PC9H_000744	CDS	scaffold_1	2154154	2155183	-		hypothetical protein		PF13640	IPR005123;IPR006620	ENOG410PNNI	S:(S) Function unknown		GO:0031418;GO:0005506;GO:0016705;GO:0016491;GO:0055114						MSKQQRKGKAQTSKATRGTKGENPPSPEHNYTFPAIAPKDYLECRTLLDDQILLIDNFLTAAECKQYIQFIDNLPLELTPPKKRGEAERVNYRFSIPSVDFAERLHSLFQPYVLSLPTPSTWRTSESHHSPVGCNSNIRLYKYNPGQHFGPHYDDSVRDPATGLKSEWTILMYLSGIEDGVEGGETIFYLEQKGKAREAIAAPLTRGTALLHRHGSECLLHEGSPVRKGTKYILRSDLMFKY
PC9H_000745	CDS	scaffold_1	2155263	2156732	-	ALG3	dolichyl-P-Man:Man(5)GlcNAc(2)-PP-dolichol alpha-1,3-mannosyltransferase		PF05208	IPR007873	ENOG410PJ0Q	G:(G) Carbohydrate transport and metabolism		GO:0030176;GO:0000030		8 (i21-42o108-127i147-170o176-202i268-287o318-337i358- 377o383-401i)		GT58		MISHFLRHPFQALCELLTNPRYFGAVAALVVVGDAVLTQLIVRFIPYTEIDWETYMAQIAVIMKGETNYSRISGPTGPLVYPAGHVYIHQLLYKITDAGRNMALSQQIYAGLYVSSLILTCCIYRKAGAPNWLLLALPLSKRLHSIYVLRLFNDCWSVTAALAAVLAYQLEMDDLAVLLYSTALSIKMSILLYLPGLLVLLYKRRGLLTTFRQMITILSFQAVIARTFIKADLSAYLNGAFDLSRVFLFKWTVNWRILGEGLFLDRRWAVGLLVGHVSVLVAVGYRWCRPDGGPLPTILRGISRPSTPAGLVPVSPDYVATVLFTSNLIGIFFARSLHYQFYSWYAQQLPFLVFKTHYAMPVKLAILVAVEFAWNVYPSTNVSSSILLLAHSLLLAGIW…
PC9H_000746	CDS	scaffold_1	2156946	2158724	+	ARG4	argininosuccinate lyase	EOG092R09CZ	PF00206;PF14698	IPR000362;IPR008948;IPR009049;IPR020557;IPR022761;IPR024083;IPR029419	ENOG410PHD8	E:(E) Amino acid transport and metabolism		GO:0004056;GO:0003824;GO:0042450						MAEQPTKQKLWGGRFTGTTDPLMHEFNQSLKYDQRMHAADIKGSIAYAKALSLVGILTAQERDKIVDGLKRVGKEWEDGVFKPQPDDEDIHTANERRLSELIGPLGGKLHTGRSRNDQVATDMRIWLLEEVKDIEESLKGLIRVMVERADKEKDILLPGYTHLQRGQPIRWSHLLLSHAFSFRSDLERLQQQVARISVLPLGCGALAGNPFVVDREFLAKELGFQSLAENSLWGVGDRDFIVEFLMWGSLTMAHISRMAEDLIVYSTAEFGFVSLSDAYSTGSSIMPQKKNPDSLELLRGKSGRIFGNMAGFLMTLKGLPSTYNKDLQEDKEPLFDSVDNVSASLKIAEGVVATLEVHADRMRQALTMDVLATDLADYLVRKGIPFRETHHISGRAVAL…
PC9H_000747	CDS	scaffold_1	2159109	2160574	+	SSO2_1	Plasma membrane t-SNARE, secretory vesicle fusion		PF00804;PF05739;PF14523	IPR000727;IPR006011;IPR010989	ENOG410PK20	U:(U) Intracellular trafficking, secretion, and vesicular transport		GO:0016020;GO:0016192		1 (i309-330o)				MARDRLAAMRAQQQGGGNNYSNNSYPTQASGGGGGGYNSRNNPYAQQDDKTYEMSDVKDSQTHLTAAADFGGDNMSAFYSEISSLQDSLRTFNDNVSRIGDLHSRSLNNTDDQAAQRNAAQLEELVEDTSALSATLKRRIKALERSPGSGRDGQIRKQQTALVKSKFVEAIQNYQTVEQQFRSKYKQRMERQFKIVKPDASPEEVKAVVNDESGGQIFSQALISSNRYGESRAAYREVQERHEDIKKIERTLTELAQLFNDMSVLVEQQEETINVIETAAAGVEKDTEVGLGYTEKAVDSARAARKKRWICFIICLVVLIIVGIIIAVVITQQVNKTK
PC9H_000748	CDS	scaffold_1	2161280	2161563	+		hypothetical protein		PF01428	IPR000058;IPR035896	ENOG410PTF9	S:(S) Function unknown		GO:0008270						MAAKKRCQLQAETPCNSAVLRIVGECPMCRHQFCGEHRLPEHHNCNQLEDCRKQAYERNKLKLESERTVASKMATA
PC9H_000749	CDS	scaffold_1	2162476	2164139	+	AAT2	Aspartate aminotransferase, cytoplasmic		PF00155	IPR000796;IPR004838;IPR004839;IPR015421;IPR015422;IPR015424	ENOG410PGES	E:(E) Amino acid transport and metabolism		GO:0008483;GO:0003824;GO:0030170;GO:0006520;GO:0009058						MADRLKQLLNHVLPSNNMSAELWQSVPLAPPDSIFKLTATYKADTFPQKVNLGVGAYRDDDNKPWVLPVIKKATQILLNDDKLDHEYLPITGLPEFTSAAAKLILGANSPAIADGRVSSVQTISGTGANHLGALFLSRFYGWDAEKKVHLSNPTWANHQAIFRNVGIEPVDYPYYDPATIGLDYKGFINSLETAPPRSVFLLHACAHNPTGVDPTQEQWKTIADVMLAKNHYAFFDCAYQGFASGDLDNDAWAVRHFVDRAVPMLVCQSFAKNAGLYGERVGALHVIAPSAEGANRVKSQLSVLQRSEISNPPSHGARLVSLVLNDPGLFEEWKRDIRTMAGRIIEMRKELHRLLTEELKNPRNWDHILNQIGMFSFTGISPDQSKALIEKAHIYLTAN…
PC9H_000750	CDS	scaffold_1	2164303	2168256	+		hypothetical protein		PF02985	IPR000357;IPR011989;IPR016024;IPR021133	ENOG410QEDD	T:(T) Signal transduction mechanisms		GO:0005515						MFPPSSPSDTAGAPNPSSSPLSATAPPSYIQLPPPPCFSSFAFSQSPSHPSPDPFDRTPTSPSIYYTAPSSPYTESPTNSEPSSPLKSPGSPPPLPGLHITIPSGPLPRSPNYEPLQNEAFPTTDVSIDIALDDESLSPLEKIYLFSRNNDPFHRVFIIHAMPSFLEQVTPLEADEYVLPLLRSLAQDEDETVKEALAAELVPIIWWFFTHCQIVPEGVKANEFGQPSTIPVTTICVQSFTPIFGRLLLSPNPMVGGPTRSAVVEILAKMRRADIKEGLLPASMGPTNSLDDQPPSDPQSESEADSVIGLFGKVERELFEHELLQHVVIGMGRLDMMATDDCQEPQPEDYAYEDWDGSSQDISPATNNLTDGSTAESSPDAMDVDVEERTPMLEEPVNP…
PC9H_000751	CDS	scaffold_1	2168724	2170187	+		hypothetical protein				ENOG410Q3XW					5 (i12-32o44-65i72-90o96-116i137-162o)				MMDRVMRILRCVLFAFFIVCNAIICSGAVWNLSLMQPLGWRMEVNVYLIVIGAIAVTFSFALMFCELLRPNGFTSLVWVECAWVTLFLVLELAGASAFLAIVPALTCQPLGVPARLNDGRRSRLLTRVNGACSSTRLVLAFTWICSLMLLIYVCFLTISAVIQSKDDPKIWVSSVRHLRWSEERRQLSSAPPSPTRPRFIKKNPSIVAPRPRRVLQAPNIYAYRSGLSDDYQIEHFQPPNAIQSEPVEPEPALLLRNDSQPPVNYNAYPAVSFYPQYMQSAITPAIHQQLPPEQQAGPSSPPPLGDWPRRDVLSHPAKPKRRPAPPLDDELAAIANLTSPSASHTRRPSGPRTRSTMNAYNSRPPPPLDLTNISSHRT
PC9H_000752	CDS	scaffold_1	2170741	2172058	+		hypothetical protein				ENOG410Q3N2					4 (i28-48o68-90i102-121o141-167i)				MPALTSSSSSTSSEKANTNERRLPNPVVVIRFLAFALLVFLNFQLLVFTAWNIHAALSISLPVSGPTIVFIFNCCFLYLFIVFAMVEYIRPYSKTGQIKFELAWSGVISLMYLGATISLTVDGPTQVCEATKDSSICASASLLLPVAWATTLTLLTYLFGLVVLCAVHVPSYPAIWDDTVYKFPWFLHPDGTYQPYVRERKTDEETGDASSPTSIATHGTRRRFTLDPPSWAKALNVRRGRDSPFATSGVQSGTPSMVPSSVTVAPSVPPKDLRIKVPPTPSREGSPFPDSVDNQDIPIPLPRLSAWIRADAIRGITVHTIPIPTP
PC9H_000753	CDS	scaffold_1	2172931	2174687	+		hypothetical protein				ENOG410Q4G3					4 (o16-37i49-73o79-99i120-143o)				MGSAKLWAAFTKYRRITFAFCAVASLGWAIFLSIFLSREWVEYDISERAIVVGLVAHHGLATILLYLMAVLQFRKWLDAARVAFVLIFQTGTIIVFSLFSTDFPCNQFLGSPAACRTGMMAAIIGIWSQTGVLLIYACVLALMTCFPAPVQAPVEVAKVTPYGVVSKRSSASSVDSQTRLLRVDNSGYSRAPSPRTHYAQPVNSLSPMRSAALPSSPLHSPRPDGYGHTRGYRPNTPGLSYSSTASSASSVRVPSTGPSYGPNLRSPPRSPRGPPGTPAPMILNPFLDPLSRSSSAVSSSTYASSANNWNPYAAPMRYNYGTLTPPPNTPRMLEAQYRPGAPPKSAPPYYSTTPFIPEERYMQNATAFLQVPMSPYAVQPSAQRLMPPRSMTATPAHSI…
PC9H_000754	CDS	scaffold_1	2174985	2175758	+		hypothetical protein		PF04930	IPR007014	ENOG410PRFS	S:(S) Function unknown				3 (i57-76o110-129i136-156o)				MASFASVFARQSCYSRIMSLQTSFRQTSGLRNVVARSPGRGIHSTPGTGRRLSSYKAFGVAGVGLGLVTAAMPTVYCDVSDNEKAQRQAAASPRAEQPKSSLPPPPSSAINVYELTFGSVCGICAGIFLKKGAKAVAFVFGGLFVLLQYFTSVSLVRVDWVKMGSRFENLFYRTDAVTGARKAPSIVSLWTWLVDFLTSDFQPRASFIAGLALGLRIG
PC9H_000755	CDS	scaffold_1	2175887	2178334	+	NOP2	rRNA (cytosine-C5-)-methyltransferase nop2	EOG092R0AG4	PF01189;PF17125	IPR001678;IPR011023;IPR018314;IPR023267;IPR023273;IPR029063;IPR031341	ENOG410PHXV	A:(A) RNA processing and modification		GO:0008168;GO:0003723;GO:0008757;GO:0006364						MGRRAKNKQAAPEPFEVVPASYSRKNGKRKADEREHEIARPSKKVKDDKKVTKGKPKSILKGASATAPKRVAPKKKAAGSEDEASDGWEDVEDEDVETHKKSLFNDSDDDGGWAGLAGDLGDLDDDDDMLGDGPVEELDLGSDDDEPPTTLKIKGSKSKQSSRPAKIIPDALESSDSDSSSEDEEERITIANMEARSRALDAQATADAEIDAEEMQRAEQEGGSDDFDEMDEEMDEGPDGEAFHLPTAEERAEEKQAGGPDVNSVQRRMRECVRVLGNFKKRAEAGRSRSEYIEQLTSDIASYYGYNDFLTEKLFHLFPVAEAIEFFEANEVPRPVTIRTNTLRTRRRDLAQALVNRGVNLEPIGKWTNVGLQVFESSVPIGATPEYLAGHYMLQAASS…
PC9H_000756	CDS	scaffold_1	2178861	2179900	-		hypothetical protein		PF06687	IPR009571	ENOG410PNRT	S:(S) Function unknown		GO:0005886		3 (n2-20c24/25o116-138i150-178o198-222i)				MVFIFVAPVFLLIAFILLLLVSVSVPVVYTINLFGIGVNTGGRFANAGANGYVTFGVWGYCIDRMNMQFGGFNRGLYGDCSHPGVGYYFDPWVANALRVNPFYFENTISHSVTSALVMHVLAAILTFFTMAISVFMVVKRGSAGTARAPSLCTLILGVLAGLFTTVCFLIDVIFVAVVRDRIRDLSNDVLYVEYGNGVWMTLVAAILIWIGMVGACCGIFSCGGSRRFRKSQPVEAS
PC9H_000757	CDS	scaffold_1	2180569	2181757	+		hypothetical protein													MSAPETAAPVAPVEDKKPETTPAPEATPAAEAAKVEEPAVEAPKAEEPKAEETPATEPATTTETPAAEEAAEPAKDEAKPAEETSKEERPKSPGFLAKLLAPFKGDKKVKAPKSPKKEKKKEVEAEAAAPATEEAAEPAPEAPAEETAEPAKTEEAPAAEPVKETETAEAPAAAEPAAEEPKEEKKEEKKEEKKAPKVGRRLSARVTDLFKSTKKHEVTPPAKVDENPPKIDEPTPVAPLENPASESAAETPAAPAETPAPAKEEEPSKPVEAAPPAAPVVAAAA
PC9H_000758	CDS	scaffold_1	2182271	2185591	+		hypothetical protein	EOG092R03JU	PF00132;PF00483;PF02020	IPR001451;IPR003307;IPR005835;IPR011004;IPR016021;IPR016024;IPR029044;IPR035543	ENOG410PFJ7	J:(J) Translation, ribosomal structure and biogenesis		GO:0005515;GO:0016779;GO:0009058						MPPKQSNPKDPLISDDDEVLQAVILSDSFNKRFRPLTRRKPRCLLPICNAPLLDWTLESLALAGVQEIFVICRSYATQVKAALSKSKWSAPNSGIKITPIMTAKETFSPGDAMRDIYTRGLLTSDFVLVYGDLVSNIRIDDVVRVHKERRKVNKDAIMTMVVKEAGIGHRTRSRGESSVFVLDPETSECLHYEPVMGYPRKSVARIPREVVAAHPRIEIRNDLIDCQIDVCSVEVPSLFTDNFDYGDIRRDFVHGILTSDLLMKNIHCYIAKEGYAARVQDTRSYDSVSKDILSRWTFPMVPDNNHPADHAYEHIRGNKYIPKDNSVVLARTCKIGPKSLIGPASNCSEDTTITSSVIGANCVIGPRSTISNAYIFDNTVIGADCVIDRSIVGSNVQVK…
PC9H_000759	CDS	scaffold_1	2186288	2187221	+	BNA7	Kynurenine formamidase			IPR029058	ENOG410PPMY	E:(E) Amino acid transport and metabolism								MTLRTNTGKHCFPMAVIPNIDYSPKRDPQRQFDFYSPPVPTRSIVVFVHGGAWRAYVPSDSSRCACAHCYAHYAHSEDKADHAPLAQSLCKHTQLAVAVPNYRLTPSNPQAGDDVFRHPGHAEDLLHFLEFLIQWPGPDGITGVGGGIRRLYLIGHSCSAHMLASIFLDSSKVTPSLGPSATLLEAVKAIVMSEGIYDIPLLLSSFPAYLGWFIANTFGQHDSYDQFSTTRLPLRTSDIRWYIIHSKDDTLVDEIQSQTMYDRLHTLLGSKATEGVSKNMDQITGDHNAIFKGDAYVRTVGDYITRIDSN
PC9H_000760	CDS	scaffold_1	2187302	2189654	-	BNA5	Kynureninase (L-kynurenine hydrolase)	EOG092R091V	PF00266	IPR000192;IPR010111;IPR015421;IPR015422;IPR015424	ENOG410PH7Q	E:(E) Amino acid transport and metabolism		GO:0005737;GO:0030170;GO:0030429;GO:0003824;GO:0006569;GO:0009435						MSPTTDLYKPLSDDFILPSNRDVGGEKHSDPDASCTYLCGNSLGPLSKSSERLVHEELDAWRHRAVEGHFSHPYNRPWTKITDHVHPLLAEVVGAKEKEVVCMGTLTTNLHLMMTSFYTPTPNRFKILCEAKAFPSDQYAFASQVLLHGYAPADAIIEVSPREGEFHLREEDILDIIDREGDTIALVLFSGVQYYTGQLFPMASITEKAKSKGCICGWDLAHGVGNVPLSLHDWDVDFAVWCTYKYLNSGPGGIAGLFIHEKWNDEKKPMQAGWWGHELSTRFAMPPTFQPIPGAQGFQQSNPSALTIASLLGSLQIYKSVGMMQPVRERSLKLTGALESFLKKSRYFVPLEQAIKHDSQGRLGFTIITPSDPNMRGSQLSLLFLPQGSEVMRNVFKSL…
PC9H_000761	CDS	scaffold_1	2189893	2191806	+	BNA4	kynurenine 3-monooxygenase, mitochondrial precursor		PF01134;PF01494	IPR002938;IPR027545;IPR036188	ENOG410PFFH	C:(C) Energy production and conversion		GO:0071949;GO:0004502;GO:0006569;GO:0019805		1 (o476-497i)				MNTAHPAHQRTAAVVGAGPVGCLAAIALAHRGWQVQLYEGRSDMRLPTSKAVSQQRSINLAISSRGILALQAISPSTAQRLLQAVIPMKGRMIHHINGKQESQLYDKDGQCINSIDRALLNEELLQEAANTKNIRILFDHKVQNVDFEKKIIGGRNVRTGEDASSAFDLIIGADGSYSVVRRQMMRVVRMNYQQEYIRDEYKELKMQPGRDKDGNPTFLIDPNHLHIWPRHSFMLIALPNQDKTFTCTLFAPSAEFDHLQTPETILAWFKLNFPDALSLIGEDTLVKDFQRNPRCPLICTKSRPYHYKDCAILLGDAAHSMVPFYGQGLNCGLEDVRVLDALLHEEGVSSTEPPAHSSTNGSDEKLHRVLDRYSENRHEDLIAICDLAMDNYAEMRHSV…
PC9H_000762	CDS	scaffold_1	2192293	2192856	-		hypothetical protein			IPR017956				GO:0003677						MSSSPHDPADDPAENKDELDPQTGDDAEPGAPADAVTPVKRGRGRPKGSKNKKTLAAATEADASTSTQPPRRKRGRPRKEKPEDSGDAPPPAKRKRGRPPKPKPEAPTSGEASNGDGSEPAKRKRGRPPTKKT
PC9H_000763	CDS	scaffold_1	2193548	2195492	+	YOS9	Protein OS-9	EOG092R0GHG	PF07915	IPR009011;IPR012913	ENOG410PK6W	O:(O) Posttranslational modification, protein turnover, chaperones			SignalP(1-17)					MRRCLLAAIYALPYAAARLLHSLPEDPAAFPKYRVAFLNALPVLNQTAEKWLRDGLRGGELEFLDSQWSEGDVSETYTSPKEIGSGDTHEEFHTSRHQPWDTPYSLEHMKIGPRDSYICFIPKPLEIPPSVDDEVDSDITTLRSWSLLQPLVGTCLYHRQGWFTYSYCHNKEIRQFKELIQAQPHVSGGYKPEEDPEWESYTLGRAPANPEPGADLTVTEQNALAANLELAKGAGSRYLVQKWSDGTFCDKTGRKREVEVQFHCSMTMTDTILFVKETKTCSYILVINTPRLCGEPGFRSPRDTRSEALIRCRAVVDSPQDFPAFDNKLAESDYPFKLPRQKPVLSPPPTEPKGTKSEAKDPKVSLSTEQVDEMVRKALQTFADNKAAGKTDEPNVHIE…
PC9H_000764	CDS	scaffold_1	2198350	2200859	-	HRK1	serine/threonine protein kinase		PF00069;PF07714	IPR000719;IPR008271;IPR011009;IPR017441	ENOG410PGRB	T:(T) Signal transduction mechanisms		GO:0004672;GO:0005524;GO:0006468						MPHSAVHIVPAVPQQHKNGPLHDLKRFLNNHIQQHNPASSRTTSPRHISARPSQPASPAVLQDSYVPFPAEPDDSSPSKPSLREGKRSFSSRRSKSTRPPALPQDKPGAPSSSTSHSPTARSPTSAAPPPPDNSQGTISNHRKRSTRSAGATTPSHAIYSLQDATQAHLSKKYGKWGRVLGSGAGGTVRLIQASTKNGGSIFAVKEFRPKRSNESEKEYQKKVTAEFCVGSTLKHPNIIETVDIVSDHGHYYEVMEYAPYDLFSVVMSGRMCRPEIYCVFRQICDGVEYLHEMGLAHRDLKLDNCVMTNDNVVKLIDFGTATVFHYPGKAQQSATGIVGSDPYLAPEVLSQDSYDPRKTDVWSVAIIFLCMTLRRFPWKIPDPKTDPSFRAFVNAHPDL…
PC9H_000765	CDS	scaffold_1	2203284	2206178	-	PRP28	mRNA splicing protein prp28	EOG092R08JB	PF00270;PF00271	IPR000629;IPR001650;IPR011545;IPR014001;IPR014014;IPR027417	ENOG410PFDF	A:(A) RNA processing and modification		GO:0005524;GO:0003676						MATRSEPLSIESLLQKQKAEKEAAAKPKFLSKEERAKLAIAKRAQEIREQKEREEASQKDRETLEREANELRRKEMGSSNRYGGGRYEDRYAHPERDRGGRHGRRDGRDRDRDRDREREREQRPPSGANTHRDGYQNVPTGPRADRNKQSAPTPSSSTGTPTPGTPSSMPPPPPPDTAPQISIPDSSGSYVPPMTENDLSAIRSRYLGVDKKKRKIRKMNDRKFVFDWDAQDDTLVEDSFVAVGSNRQGAQVMFGRGHLAGMDDGGPSGPRKSETTVTHLADAMERRKAAKAGFDERHWTEKPLEEMKERDWRIFREDFSISARGGQIPHPLRSWTESAIPPAILECIENIGYKEPSPIQRQAIPIGLQNRDIIGIAETGSGKTAAFVIPMLTFILKLP…
PC9H_000766	CDS	scaffold_1	2206401	2208720	+	ASN1	asparagine synthetase	EOG092R04PJ	PF13522;PF13537	IPR001962;IPR006426;IPR014729;IPR017932;IPR029055;IPR033738	ENOG410PH2V	E:(E) Amino acid transport and metabolism		GO:0004066;GO:0006529			C44			MCGIFAVHGLDKPSADRAHFIALSKRLRHRGPDWSGCFVGKNCTLVHERLAIVGVDTGAQPLVSEDGKIILAVNGEIYNHIQLRASVGPGVKFKTHSDCEVIIPLYRKYDKDVCGHLDGMFSFVLLDESEEKPRIIAARDPIGITTLYQGWSSKRPGAVYFASELKALVDDCDKIISFPPGHIYDSRDGSTTRYFTPSWWNGDNEVNPTIPSASPDYKLIKETLEAAVRKRLMSEVPYGVLLSGGLDSSLIAAIASRETEKVAQAQYEARKKKLEEALTLAAWPQLHSFSIGLENSPDLLAARKVAHYLGTVHHEYVFTVQEGLDAIPEVIYHLETYDVTTVRASTPMYLLSRKIKAMGVKMVLSGEGSDEIFGGYLYFHAAPDRVSFHQECVRRVKNL…
PC9H_000767	CDS	scaffold_1	2209072	2212475	-		hypothetical protein		PF00621	IPR000219;IPR035899	ENOG410PMVE	S:(S) Function unknown		GO:0005089;GO:0035023						MKAFLSRLHIGGGAKDKERDPQPVQKEKFPPLRSWPPDDHNRATSTPTSYASFKPLPELLPSQLADQFSPRLLPPIDEPASTSTRTTPTPTPTPTLPYTPSPQPTLRNDDPSAEAANRVASPSKQDPEAPGRISRKPTSTSVNTSPAPNEGQKKQVAFISPPPTPNLTDVDRSLPDAPANGQASASPLKTTLTRFQAMHGKEPRGSTSTSGASSSKTDLSATPSSNTAVKATSTRATSPSLHKTSGDGVSMQSLRSGTPYSQMSQSSGSRILAATSWSEVIEDDLVSNIGSRERTRQEVLFEIISSEERYVQELIKMKETFIDPLLHPFSSAGTPLSASTPNLDYDYYRAESPLESTDHLPPIAARFMSPTPTTGHPPGSGPSSIRNKDTPNIDGESLD…
PC9H_000768	CDS	scaffold_1	2212595	2213463	+		hypothetical protein		PF10294	IPR019410;IPR029063	ENOG410PS9S	S:(S) Function unknown								MHPSPLPAHLTKHLPLLHYPFRNNNFLLAQQNDGFSTGTALWLGAQCLSAFLAENFTSRNRLKVIELGSGIGLTALAMSSLGWDVLATDLPHIISSVLAQNISRNLTRLSGSIQIQELDWTAELPWDDGSPGVTISTSSHPSSASLPEAGALSPPFDLIVTADTIYTPELIQPLLRTLHALSKISVVPGSRPPLVFVCLERRDPELVDRFLACARDPWHFHTEQVQRKKITKAMEKSGLKWQREDWDDVEIWKLRWEAETQAHGQTAT
PC9H_000769	CDS	scaffold_1	2213584	2214277	-		hypothetical protein			IPR011992	ENOG410PYEJ									MQVGHAPECKDRLQLSPSLSSPGIKMTTEEKPKDSKNLMAISIDTLDFLQCEKCLKHIFAKYCTPQPKDLPTGSITELLVPPEDAYLTNEGLDKWASETNGAPFSEDQKEELQMLDVNDDGHLTYAGFIQLYQLQTENDEAETWRDLIAHGFNGRLEKIARPS
PC9H_000770	CDS	scaffold_1	2218448	2220161	-		hypothetical protein				ENOG41143G0	S:(S) Function unknown								MPDTVLASAPSRPATPFTSPTPRSHSMQPLDDHLLTPRKEISDKRRRTDGNQSPPLSRPTSRADSAHDTFFSQPADFTPLGHIVGIRIKSGGSIPGYPADEWARDCTQMLGLIAEGARATSQRITDPDSDLDTMQHIFNVYDGLRTCAEALSFLVPEETLEYIGPLPPLDKGARARRADTHSSSAETTTGEIKDLIKGLESSLSLRIANIERQVRGQNNPQPRHPPQISTSPNAVAPSQSLHSTASYATATANGAQKTPPAPSATKPSTRPHTNVKFIVRFQGRLPPDTARKTPLLMSTALNYAFGNSITAREANLTILGAEWNRTGNINLVFPANTRPSVVHSHLGIIRPIVDHGVKDVCISHDTKWSKLVCSRVPAHDPEGQPWEPVALGVMLRRNP…
PC9H_000771	CDS	scaffold_1	2220339	2221692	+	SSO2_2	Plasma membrane t-SNARE, secretory vesicle fusion		PF00804;PF05739	IPR000727;IPR006011;IPR010989	ENOG410PK20	U:(U) Intracellular trafficking, secretion, and vesicular transport		GO:0016020;GO:0016192		1 (i278-301o)				MDRLAAARAQRRQHDGASEPPHELSGYQNGQYTNGTTNDDTTGFLNEIVDIQDSIDRLQTNVNRIAGLHTRSMDAVGDVSPKDAAELEDLTTETRALANTIKDRIKGLESKPLTGRDAQIRRNRTGLIRKNFLEALQRYQQVEQQSRAKARERVERQFKIGMSNPNATQEEVAAVVNNSSGQGDQIFANALTSSTRYGDSRVAYREVQERHQEILHMEQTLAELAQLFNDMAVLVEQQDATIVDIETTAGKVEADAKAGDEQVAIAVKHARSARRKRWICFFIFLFVIVVLGLALGLKFGLDNNNNNNRNPQ
PC9H_000772	CDS	scaffold_1	2221922	2222924	+	PIS1	CDP-diacylglycerol-inositol 3-phosphatidyltransferase		PF01066	IPR000462;IPR014387	ENOG410PI51	I:(I) Lipid transport and metabolism		GO:0016020;GO:0016780;GO:0008654		3 (o37-55i170-189o209-229i)				MSSEPKPTHSRRRASIEVVDANVALDLATAQTYSENVFLFVPNIIGYTRVLLAALSMHYMSYHPKYCTLAYVVSCLLDAVDGQAARALGQTSKFGAVLDMVTDRCTTSCLLCYLTSAYPKWTVLFQFLIALDFSSHYMHMYSSLITGSRSHKTVQSDVSRILRWYYNDSTTLFLVCAGNELFFVALYLMKWIKTPLDLDFLPPILASLTWPQALAAISFPVFFIKNFLLNTVQLWKASKILVGVDLAERAKAREEALARKR
PC9H_000773	CDS	scaffold_1	2223158	2226579	+		hypothetical protein		PF00004	IPR003593;IPR003959;IPR003960;IPR027417;IPR041569	ENOG410PFZ9	O:(O) Posttranslational modification, protein turnover, chaperones		GO:0005524						MRSSQALFRRSRSLFQSTALNSARRSTTRLARPSRKDVTVPSSTGTPGIRLSSSATPPPSNEPVEPIPDSTPTPTPTPSPDAPENEGAPSEDSEKPRVRRTRLTLTVSKDAETLQLPEDLDILWAPESEPPERATSDLSALPPDDILDDALHNLHIALHPQTQHKATYATGSAAIEPTLALCCPIEGGEYIIDATVRELGRRTGAEVIELDAVQLAAGEWGHFGKAGSAIQLPQNPLHFASSSSSSTPTSRSNHNDEDDDQDMPAQMFPPQQMTLTLMTSASPGGRTVISPPSRRTSTPSKAKVFFDALVNTPPKQNTDDPQPSSSTSSHRPRLIYVRDFQTLAATSSTWYPPLLSAVRQRRRGPISRPSSPVSNPMVIVFGISPSLTPPSSLSPQGAA…
PC9H_000774	CDS	scaffold_1	2226682	2227978	-		hypothetical protein	EOG092R0KI5	PF07574;PF08746	IPR011513;IPR013083;IPR014857;IPR036388	ENOG410PS3R	O:(O) Posttranslational modification, protein turnover, chaperones		GO:0030915;GO:0006281						MVSSGDVQRLFLQAVLSRGVLSVKLAQAIWAKCVDAVKAADDSLAIAHSNQRAAWDEFVARVNTSIDNLDLEFRHLHDEHTGREMYALVNRKGDEIAQMASHYSPAEIAFFRALVEQIMLAPNESYCVSSLAALREVHVLQTSMSKSQAEVVLGSFVANGWLYKSKQGRYSLSTRSLLELLPYLKTTYPDEVNECTICMEIITRGAACHTANCKTRMHFHCFTTYRKRHNVCASCGREWPQQAAELLPVGEGAAKSIDDARRRTRQKEADSDDEEEEEFDAESQPTQSQATQATQSQPTRSQRSRNKGKKKQVEEDVSMDEEGEPEVKEEAPKRSQARRRSRR
PC9H_000775	CDS	scaffold_1	2228175	2229026	-	CHO1	CDP-diacylglycerol-serine O-phosphatidyltransferase	EOG092R0H8R	PF01066	IPR000462;IPR004533	ENOG410PKTK	I:(I) Lipid transport and metabolism		GO:0016020;GO:0016780;GO:0008654		6 (i48-69o75-92i113-135o141-163i175-192o220-239i)				MTLNQRKSTQKSNDNSQMPPKAKDHTLQQYADTDGHFSLVRNFRLADLVTIMNGVCGSLSIFSSAHYLLSNDPDYLWTALSLPLAGLMFDFLDGKVARWRKSTSLLGQELDSLADLISFGVAPALLAFVVGLRTYLDTVCLTGFICCGLARLARFNATVALVPKNEAGKASYFEGLPIPTSLGLVAVLSYWVKNDWIEGKQGIPWGTITLWGDAGGRGELHLVSIVFGLWAAAMVSKTLRVPKL
PC9H_000776	CDS	scaffold_1	2229134	2230974	-		hypothetical protein		PF04104	IPR007238;IPR016558	ENOG410PIE0	F:(F) Nucleotide transport and metabolism		GO:0003896;GO:0016779;GO:0006269						MLKARTVRKPTNVEEKSSFDEHTFGLEYPHRLNFYDRPPAFDVTLEEFETAALDRLRVLAEIESSAVRGRSWEETKSVTGEHCNKYLPLHSSTAKYIDRDAERRKDILGHFVLRLAFSRSDELRQRFLKAELTLFKVRYDDSDMGEREAFSESRNFNWVKVDDEEKKAIRSQLFSVYSGPKATREALFKQETYLKVRWTRVPDLVSHRKVFLKGGWAYVPSREQSSIIFQEFESHLEQALLLTAKSLPRLDEDTRLDPILTNLSKGFLAGVASGWNDDQTDKDHITADMIDSLSKHFPLCMQHLHFKLTKDRHLPHFGRLQYGLFLKVLGLPIDEAIAFWRRSFSKITDDEFNKKYKYNIRHSYGLEGRKANYSALSCSQILIPSNKDSNWVCPYKHFA…
PC9H_000777	CDS	scaffold_1	2231255	2236646	-		hypothetical protein													MKSFFQRHSESRPGPSKPSSKSRHKPWASVDSVQVTPPIASAPPEKQRNSEDRPYAPSRPTAQNGIAPGVPASAIHGQTHVRSQPTQPQDVPVRATQPVNSSPDDRDARGRRSTKPPTPLSSSEHVSGIDEPKTARPSRQRGGQEPGPPATAPAPEIWIPPSTTTQPTNHVPSRPSQDRERMLPHREEGRRDREHGERERDRAREREKERKREKENKRDEEYRARDVNGAEKDYTRSRDAERHRERERRREYPSSGTKDRDRDRTRDRAGESGRGREGDRTRERYEYERAERERMRAEEERYARTREQAERDKMKEASRTAEPPQSRSRSKSRHPTREFLEEGDSSDSSRRKPQVSYRYRGRGFEDVLPSSRKVREPPSLIPAAVGSTSASKHALSNSM…
PC9H_000778	CDS	scaffold_1	2237495	2241805	+		hypothetical protein	EOG092R00QP	PF00443;PF00917;PF12436;PF13423;PF14533	IPR001394;IPR002083;IPR008974;IPR018200;IPR024729;IPR028889;IPR029346;IPR038765	ENOG410PF84	O:(O) Posttranslational modification, protein turnover, chaperones		GO:0005515;GO:0036459;GO:0016579;GO:0006511			C19			MDALDEKHSMEIDDIVSVQDHEAFAAKHMPDLGHEVKDFQVFTWRLTNWKKLEKKITSPEFECGGHKWRILLFPFGNSNAPPNDTVSVYLDYAEPKKAPEGWHACAQFALVISNIYDPAIYTVSHAHHRFIAEESDWGFTRFSELRKLFHVAEGHNRPTIEEESADVTVFVRVLEDPTGVLWHNFVNYDSKKETGFVGLKNQGATCYMNSLLQSLYCTRYFRRAVYQIPTEDDIPTESVPLALQRAFYHLQTSDQPVGTTELTKSFGWKSLDSFLQHDVQEFNRVLQDKLESKMKGTKAEGAIAKLFVGKMKSFIKCVNVEYESSRIEEFNDIQLNVKGMKNLYESFKDYVAVETLEGENKYQAEGFGLQDAKKGIVFESFPPVLHLQLKRFEYDIQRD…
PC9H_000779	CDS	scaffold_1	2241966	2242848	-	SEC66	translocation protein S66		PF09802	IPR018624	ENOG410PN7T	U:(U) Intracellular trafficking, secretion, and vesicular transport		GO:0031207;GO:0031204		1 (o6-25i)				MASILVPIAYVIIVFGGLYVFSYFYRNYTASKYVEPYFPPHHERNLYVTLLGKSDPPVSDALLKSALVRRAMADVHRVIRLREDKPALQNLLQKGSIGDDLWNSLLAAEKELEAEIMEVVQEANAYVEGWGQVIFPTANEMIANERMRQLFESTNETRTAKEIKYGVKSKSVATSSVPSSPALTSPSPSLLTPTTPKTPNGLAPPSKAESVASSDGEAPDSPNMSRKSAKKNKKRK
PC9H_000780	CDS	scaffold_1	2243023	2245269	+		hypothetical protein		PF00285	IPR002020;IPR010109;IPR016142;IPR016143;IPR019810;IPR036969	ENOG410PFD1	C:(C) Energy production and conversion		GO:0046912;GO:0004108;GO:0006101;GO:0006099						MMLSRFSGSLTRSSRSLLYSSQRFASTKTLRETLQDVIPAKQEQLKKLKTEHAQAVVGDIKVENIIGGMRGLKSMLWEASVLDPNEGIRFHGLTIPDCQKVLPPAPGGKEMTAESMLWLLMTGQVPTAEQSRQLSQELASKGQLPAFIEQLIDSLPQTLHPMTQLGIGVAALNHDSSFQSAYEKGMKKSEYWTHTYEDCINLLARLPALAARIYRNVYHPGKEIPAIDKDLDLVGNYTNLLGFGGNKNLTEYLRLYIALHGDHEGGNASAHTSHLVGSTLADPYLAYSAALYALAGPLHGLANQEVLRWQQAMQKELGDNVTHDQIKEYLWKTLKSGQVVPGYGHGVLRQADPRFIALQEFCESRPELMASSTIQLVKKTYEVAPDVLKEHGKTKNPYP…
PC9H_000781	CDS	scaffold_1	2245511	2246837	-		hypothetical protein				ENOG410PKC7									MAAIYAVYTSPNHPTLPNHLPTLVVTPHGQPTNILYSYLHTNFNSENYLLTPSPQGDLCVAKLFPPRPKEPGKGSASDPGHGSSASSRVVRCEASRNLKWSIANTGVISPIYKLSLPSPDSPDLPLFQISKPNPNAAFWSMFYFAYAGHNIPPKRIEFGKIQKNPPGPNGGGTRISITGKTPEEKAVWQTLGEGNEDCVEWVVLCAALNLLDDEIMKAVEKNPPPGGGNRPPPVQLRDSGPTPGPGPGPGPALRGPPPPQQQQVPPLQGRPPPPPHTQSAPVNIQGGRPPPGYPPPGAGRGFPGPGPQPGGYPPPQQGFGPGPGRGGPPPPRGGMPPPGPGHMPGGGYPMRGGAPPPMQHAASQGQPRRF
PC9H_000782	CDS	scaffold_1	2247430	2249978	+		hypothetical protein	EOG092R04Y3	PF01603	IPR002554;IPR011989;IPR016024	ENOG410PFJ3	A:(A) RNA processing and modification		GO:0000159;GO:0019888;GO:0007165						MKGLKKTLLRKSSQDSNSSKHKDSKTNSAAAAAAAAAAAAPPPPPNTGKPLPQPAASIATAHSHPNNSNHYLQQQPAATRSTPLIVPSSSDRTRYSSDSASAAPPIVVVSSDADPRRGGPYSGSPERSSLTIDHAVGGAATPPRTALKGLRTGPKDTIPIVGKPPRKQRSSRFVVTDKAEIEKLPSFMEMPPSDRPQLFIRKLHQCRVLFDFNDASSDLKGKQIKAQTLHDLLEYVTTQRGVITENVYPEVVNMFAVNLFRSIPPPVNPTGDAFDPEEDEPVLELAWPHLQIVYEFFLRFVESPDFNTNQAKRFIDQSFVLNLLELFDSEDPRERDFLKTTLHRIYGKFLNLRAFIRRSINNVFFHFIYETERHNGIAELLEILGSIINGFALPLKDEH…
PC9H_000783	CDS	scaffold_1	2250378	2252574	+	HSP70_1	70-kilodalton heat shock protein		PF00012;PF06723	IPR013126;IPR018181;IPR029047;IPR029048	ENOG410PFQW	O:(O) Posttranslational modification, protein turnover, chaperones								MSSSKAIGIDLGTTYSCVGVWQNDRVEIIANDQGNRTTPSYVSFSDTERLIGDAAKNQVAMNPHNTVFDAKRLIGRKFDDIEVQSDIKHFPFTVFSKQGKPYIRVQYRGEDKEFSPEEISSMVLNKMKETAEAYLGTTVNNAVVTVPAYFNDSQRQATKDAGTISGLNVLRIINEPTAAAIAYGLDKKVVGERNVLIFDLGGGTFDVSLLTIEEGIFEVKATAGDTHLGGEDFDNRLVNHFVQEFKRKHKKDLSSNPRALRRLRTACERAKRTLSSATQTSIEIDSLFEGIDFYTSLTRARFEELCQDLFRSTLEPVEKVLRDSKIDKANVHEIVLVGGSTRIPRIVKLVSDFFNGKEPNKSINPDEAVAYGAAVQAAILSGDTSEKTQDLLLLDVAPL…
PC9H_000784	CDS	scaffold_1	2252811	2253757	-		hypothetical protein			IPR018946;IPR038607	ENOG410PJBQ	H:(H) Coenzyme transport and metabolism								MAHYRDSWDGYRANRNRILDHLVGGHIDNAIILSGDSHGNWVSDLAHPNDTTSYNPITGAGAVGVEFAGTAVTSTSTFGADTNQSIAEGLSRQLVQANPDLQWSEGFFRGFYTLTVDVHQIKADFFAMRNITIPNLEAFVSASFIVENGANKLKRPIAGGKINAGALKSTREE
PC9H_000785	CDS	scaffold_1	2257720	2263780	+		hypothetical protein		PF00172;PF04082	IPR000195;IPR001138;IPR007219;IPR035969;IPR036864	ENOG410Q3W7	K:(K) Transcription		GO:0005634;GO:0003677;GO:0008270;GO:0000981;GO:0006351;GO:0006355		2 (o444-466i507-527o)				MTMPASIPNSFYPVAPSNEGSDTESSHRTQGTQSRQGSRGTGKLTGACVHCKSLKVRCEFSPGDSACQRCQAGNYQCMARTRKKRKPAPTHEDLQERSLNQDLQIKSLLLEFDKIKTETKIREWMAKAHSDTSSEASDPNQWRVYEHAGIEHPRYMSHNVSAVDMAITTFFPQGGGLHALSPPNIVKHCGLYPPEIVELFRIFFDRINPFFSILDPDLHTPERLIWTSPFLFTVVCATASRYYTERPNLYHLAKDFARDAAGKALIDASKSVDVCQAYLLLAVYPVPKKRWTEDRSWLLMGVAIRMALELQLNQPPPPHLDDREALNRTRTWLNCFCVDGSHAIQFGKQPMLRLDDYTAKHSEDWYKTSSINIDFDIHLCGYVELIILMAEWRNEIAEE…
PC9H_000786	CDS	scaffold_1	2264043	2266521	+	SDH1_2	succinate dehydrogenase flavoprotein subunit		PF00890;PF02910	IPR003952;IPR003953;IPR011281;IPR014006;IPR015939;IPR027477;IPR036188;IPR037099	ENOG410PFY0	C:(C) Energy production and conversion		GO:0016627;GO:0050660;GO:0016491;GO:0022900;GO:0055114;GO:0006099						MFKRSLQRTLVRRQRAFHSSAPAHKVVATNPVKAEEVKSWSSGKYPLIEHEYDAIVVGAGGAGLRAAFGLAEAGFKTACITKLFPTRSHTVAAQGGINAALGNMTEDDWRWHMYDTVKGSDWLGDQDAIHYMCREAPNTVIELEHFGVPFSRTKEGKIYQRAFGGQSLKFGKGGQAYRCAAAADRTGHALLHTLYGQSLRHDTNFFIEYFALDLIMQDGECVGVIALNMEDGTLHRFRAHKTVLATGGYGRAYFSCTSAHTCSGDGNAMVARAGLPLQDLEFVQFHPTGIYGAGCLITEGSRGEGGYLLNSEGERFMERYAPTAKDLASRDVVSRSMTIEIREGRGVGPEKDHIYLQLSHLPAEVLHERLPGISETAAIFSGVDVTKEPIPVLPTVHYN…
PC9H_000787	CDS	scaffold_1	2266670	2268639	-		hypothetical protein		PF01585	IPR000467;IPR000504;IPR003954;IPR012677;IPR035979;IPR040052	ENOG410PRZS	A:(A) RNA processing and modification		GO:0003676;GO:0043484						MALPTNCSLHNHLRTQAWSAALAFAPVRRNPAQKAKAPINRLPVGASVTATTSATISATATVSSTAVIFAPPELVDPSAAAQEAESTTQAWGKKVKPPSMVLDEDVNGFRSSRGGRGNKKKGKGKKNKNAPLVNVWDPTEQYDPLRPNDYNEYKMWKQRERIQKREELAEQRRKEERKRYRRDGSYSDSENTDDDDDERPPRKMGRHDDYTEEPHESAMEEDSRPPYQATAPASAVDRSLTGDEAYMRRLALSGMRLPSPLPVQSYPPAAMEEDPNAIPGLVPTVAAPPPTLSGEEAYLRRVALSQGQRPDMPTFAPAINAPAFAPPVRPPSPPELAYNPFAPPENVPPPPPGGPGSVPAGFQDIQDKIKAAAAIAAKLSALSAAPASEGSGSSSPVPD…
PC9H_000788	CDS	scaffold_1	2269015	2269654	+		hypothetical protein		PF02410		ENOG410Q378	S:(S) Function unknown								MQALRRICRPTQRSLSTTPWFVDTEAFLQRPPPPHLTENPLTTRPPPLPKDVPHSIKELHSQLASSPHLEPSTIVVDRSLGRVMGPPLPLRKPQGRRKRGGTNAGESAFDIPGGVWNWVVLAQVKEGTESKGGIESVVRLVRKTLLGMSPPLPLGVNPKKKMHNGWAMVDAGDFAVHVLSKQAKERYFTQIEGDQW
PC9H_000789	CDS	scaffold_1	2270152	2270911	+		hypothetical protein		PF08229	IPR013248	ENOG410PTB5	S:(S) Function unknown				4 (i7-25o57-76i88-111o131-153i)				MGIRAGVVVCTTSFLLGALFTNWIADSVTLWKSPITDEHLWTAASYYSILAKAPQELLYFLGCITLLGGTTILWSLRDGEAGNLMFDGGSLFLFASTMGMYLYSVLPSIFAKFAPLPTHALKDPIPSNLRTAALDLASNNLICSVALTGVLALQAGRFWADKPEEESDDDAPQAVTTSSSTKNAAEYYTSDASEKLES
PC9H_000790	CDS	scaffold_1	2271216	2273507	-		hypothetical protein	EOG092R09RJ	PF07766	IPR002048;IPR011685;IPR011992;IPR033122	ENOG410PGFS	S:(S) Function unknown		GO:0005509;GO:0043022		1 (i155-178o)				MSLWLPRPPPSFIARSSCSRPHYFTRLSYSRIAYIPLDTTRRAGIVGNRFQSTKPASAPARVTANAANASPTVPADPATSSEVKPSPPANKEEPKGPLMTRVWKKVKHEAQHYWHGSKLLVSEVRISARLQWKILHGETLTRRERRQLKRTTQDLLRLVPFAVFIIVPFMELLLPVALKLFPNMLPSTFEDKYAAEEKQRKLLRSRLEMAKFLQETLRESGLKANAHIVGSDAFKEFFRKVRSTGESPSAQDVIQVAKLFDDDLTLDNLSRPQLVSMSRYMGLNAFGTDNFLRGTIRARLRELRRDDQLIYSEGVDELSVAELIAACQSRGIRTGGVSPARLRDELTTWIQLHLHDRVSGVLLVLGRAFNFDKKPGDEEDGKTNVIRSIESVLSGLPDN…
PC9H_000791	CDS	scaffold_1	2273649	2275812	+		hypothetical protein		PF01249;PF13532	IPR001931;IPR004574;IPR005123;IPR018279;IPR027450;IPR037151;IPR038579	ENOG410PQGY	A:(A) RNA processing and modification		GO:0005840;GO:0003735;GO:0016491;GO:0006412;GO:0055114						MPSATTSMIDLHDPSTKAYKKAKRQYQKATKNRASDTEADWTPFRAAEKRYKARFPPPDLRDVLDIATLDPARADEVKQGSWTGSVHSVEYRSVPSSATSKAYAIPQIPGLVIIPGFLSHEEQRHLIRWSLADHAKHPNDTNLDTHYLLPRHGLWNTYIESLKDPEHDETIQPRAMVSTDDPSPTQYEPTGPRQLINNTPAAPETFTTISLTPKPPPPPSQNALPSKASELLPKLRWANIGWFYHWGVKQYDFSKGKVEVDGKLRDICKSAVESVDWDALYKGTEDSWGEERAAWRNWNDTYEPDAGIVNFYQTKDTLMAHVDRSEVCATSPLVSISLGNAAVFLIGGLTRDTEPTPILLRSGDVVIMSGPACRRAYHGVPRILEGTLPRHFTDDDTEE…
PC9H_000792	CDS	scaffold_1	2276175	2279239	+	GYP7	GTPase activating protein	EOG092R02Y3	PF00566	IPR000195;IPR021935;IPR035969	ENOG410PFJW	T:(T) Signal transduction mechanisms				1 (o723-742i)				MNPSPVSSPSSFDGSLSTISFDSMVEIKRSDIPSSPEVVARRPDAEDDKHRLLYTRSKVYVHPTAYARDNIPGFVALVKREATNAVYFLAWIPESLLNEKGDDEWKKFTKIEESSTLDEEDDDVVFIDLPNHRPESYAFSVPLTSIYSLIIHPPSLSSWYGSMAINLINGDTLPTLHFHDDESRSFTAPTPKTPQSSKAGLSSYPPPPTSPSPPPKYSGSWGGDDLLNKLRSYSHLLRSTLQPSLYLVDPSKADMETHTTQIFDDDAVDDILAQSSYANSHSPVPAHRRPRPLSSSPLSPNPYSQRSSVLHRSLGSPTSSSSSPPTQARMALLQSFSNITRATRHAAQNILSHPLAKPIVPHLPDPVRSLVNVTGETEWGSWVEKGGVGEFESARVYLA…
PC9H_000793	CDS	scaffold_1	2279313	2280189	+		hypothetical protein		PF01230;PF11969;PF16278	IPR032566;IPR036265	ENOG410PRQM	S:(S) Function unknown								MSLTILRSYALKEDPSTLPPTVLFSRDDHHLVVFDAFPKGIFHFLLLPRVQEPFSAADLSNLRSLLKCDRDSVKATLEQWKEDAKVVVKDIEDEMVSRYGFKWDIWVGFHAVPSMEHVHLHIVSSDLCSEKLKHKKHYNSFHPKLGFFLHLDEVLSWFESDSYFTTMAKLDKHKYEALLKEDLACWRCGSSQKNMPTLKAHLQTEFDDLAKKEKAKQERKRKFEEKQSASNDTEEEVSKKPKTTAGSDHEAEE
[truncated: 11,082 more rows]

## Sheet: Table S5
Table S5. Families of transposable elements detected in the PC9_AS assembly.
Name	Classification	Length	Fragments	Copies	Total bp
PC9_TE_1	DNA/Unknown	1090	7	5	2771
PC9_TE_2	DNA/Unknown	2743	35	11	22718
PC9_TE_3	DNA/Unknown	1060	2	0	0
PC9_TE_4	DNA/CMC-EnSpm	4959	20	10	22022
PC9_TE_5	DNA/CMC-EnSpm	846	1	1	846
PC9_TE_6	DNA/CMC-EnSpm	594	1	1	1426
PC9_TE_7	DNA/CMC-EnSpm	1542	1	1	1542
PC9_TE_8	DNA/CMC-EnSpm	1542	6	1	1542
[truncated: 245 more rows]

## Sheet: Table S6
Table S6. PFAM domains, CAZymes, and KOG/COG classifications for the PC15, PC9_JGI, and PC9_AS genome assemblies.
[truncated: 28 more rows]

[truncated: 2 more sheets: Table S7, Table S8]
